# Supplementary material for: Palladium/H+-cocatalyzed kinetic resolution of tertiary propargylic alcohols
Source: Royal Society of Chemistry journal article supplement (doi:10.1039/c8cc01949e), 2018-01-01
Supplement: c8cc01949e1.pdf [file c8cc01949e1.pdf]

## Palladium/H<sup>+</sup>-Cocatalyzed Kinetic Resolution of tertiary Propargylic Alcohols

Wanli Zhang<sup>a</sup> and Shengming Ma<sup>\*b,c</sup>

<sup>a</sup> Shanghai Key Laboratory of Green Chemistry and Chemical Process, College of Chemistry and Molecular Engineering, East China Normal University, 3663 North Zhongshan Lu, Shanghai 200062, P. R. China

<sup>b</sup> Research Center for Molecular Recognition and Synthesis, Department of Chemistry, Fudan University, 220 Handan Lu, Shanghai 200433, P. R. China

<sup>c</sup> State Key Laboratory of Organometallic Chemistry, Shanghai Institute of Organic Chemistry, Chinese Academy of Sciences, 345 Lingling Lu, Shanghai 200032, P. R. China. E-mail: masm@sioc.ac.cn

|                                                                         |          |
|-------------------------------------------------------------------------|----------|
| General information                                                     | S2       |
| English translation table for the Chinese words used in HPLC spectra    | S3       |
| Schemes S1 and S2                                                       | S4-S5    |
| Calculation of selectivity factor <i>s</i>                              | S6       |
| Tables S1, S2, and S3                                                   | S7-S9    |
| Experimental details and analytical data                                | S10-S27  |
| Mechanistic studies                                                     | S28-S32  |
| Synthetic applications                                                  | S33-S36  |
| References                                                              | S37      |
| <sup>1</sup> H and <sup>13</sup> C NMR and HPLC spectra of the products | S38-S171 |

**General Information.** NMR spectra were taken with an Agilent-400 spectrometer (400 MHz for  $^1\text{H}$  NMR and 100 MHz for  $^{13}\text{C}$  NMR) in  $\text{CDCl}_3$ . Chemical shifts were recorded in ppm in relative to the TMS in  $\text{CDCl}_3$  and coupling constants were reported in Hz. All reactions were carried out in flame-dried Schlenk tubes.  $[\text{PdCl}(\pi\text{-allyl})]_2$  was purchased from J&K Chemicals; (*R*) and (*S*)-DTBM-Segphos were purchased from Strem Chemicals Inc.;  $(\text{PhO})_2\text{POOH}$  was purchased from Energy Chemical and purified through stirring with 1 N HCl, extracting with dichloromethane, and removing the solvent under vacuum; Anhydrous MeOH was purchased from Sinopharm Chemical Reagent Co., Ltd; Petroleum ether (b.p. 60-90  $^\circ\text{C}$ ) was purchased from Shanghai Titan Scientific Co., Ltd. Toluene was dried over sodium wire with benzophenone as the indicator and distilled freshly before use. The reaction should be conducted in a hood working efficiently due to the toxicity of CO gas. All the temperatures are referred to the oil baths used. The NMR yields of allenates and propargylic alcohols were determined by  $^1\text{H}$  NMR analysis using 1,3,5-trimethylbenzene or dibromomethane as the internal standard. The starting propargylic alcohols were synthesized according to the reported procedures.<sup>1</sup> The apparatus used in this study is shown as follows:

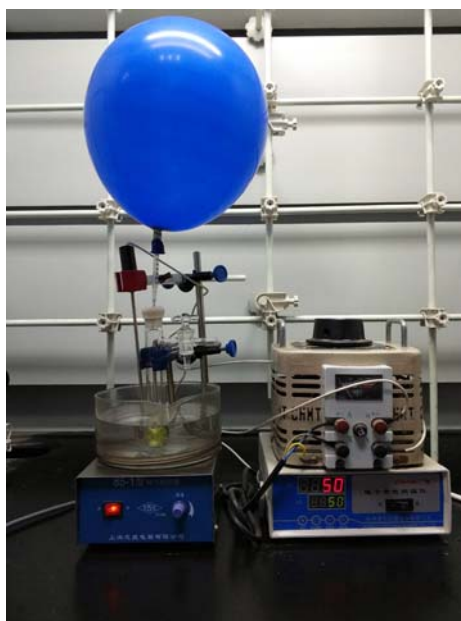

Chinese and English comparison table for the HPLC spectra (Translations have been made in all the HPLC spectra presented here)

| Chinese words | Corresponding English words                   |
|---------------|-----------------------------------------------|
| 实验内容简介        | Brief introduction of experimental conditions |
| 色谱图           | Chromatogram Figure                           |
| 电压 (mV)       | Voltage (mV)                                  |
| 时间 (min)      | Time (min)                                    |
| 峰号            | Peak No.                                      |
| 峰名            | Peak name                                     |
| 保留时间          | Retention time                                |
| 峰高            | Peak height                                   |
| 峰面积           | Peak area                                     |
| 含量            | Content                                       |

# Scheme S1 Known approaches to optically active tertiary propargylic alcohols-Part I

## a) Terminal alkyne approaches

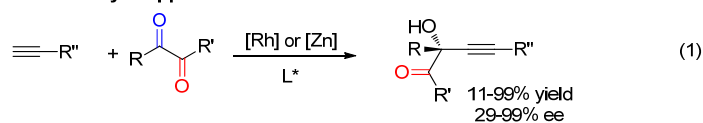

selected chiral catalysts:

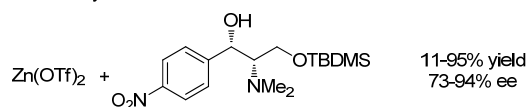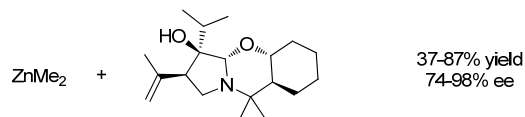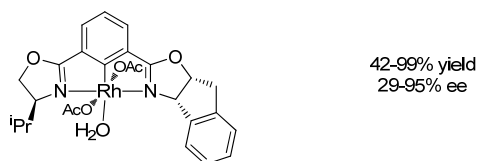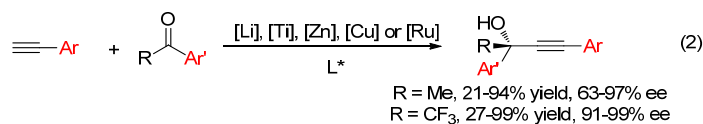

selected chiral catalysts:

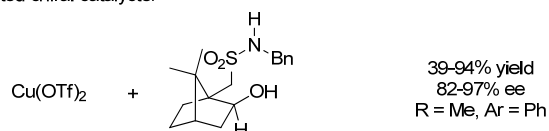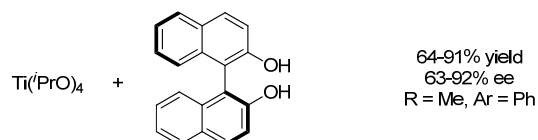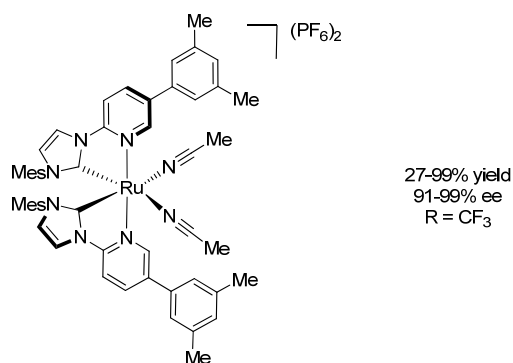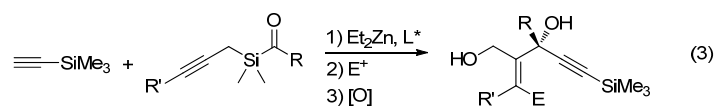

R = alkyl, R' = H or SiMe<sub>3</sub>, E = H or I  
54-71% yield, 92-96% ee

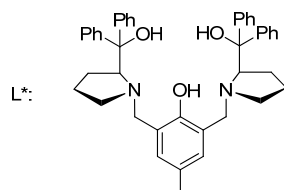

## Scheme S2 Known approaches to optically active tertiary propargylic alcohols-Part II

### b) Alkynyl ketone approach

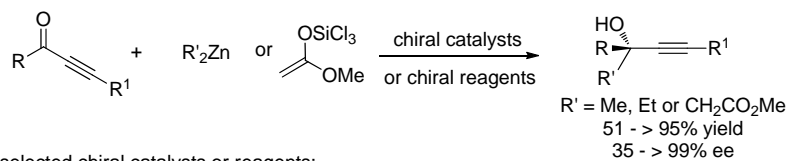

selected chiral catalysts or reagents:

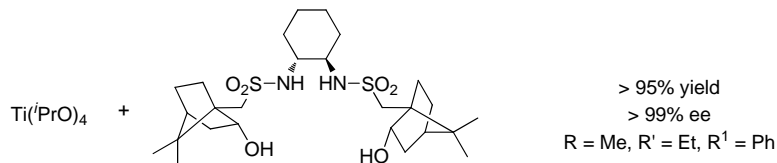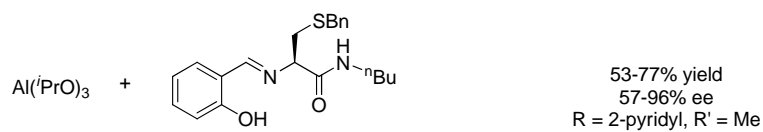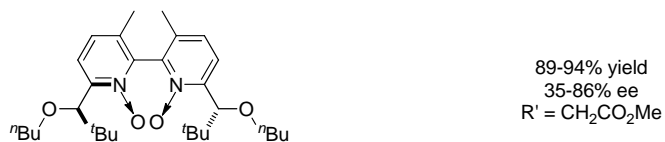

## Calculation of selectivity factor $s^2$

In the kinetic resolution process, the selectivity factor  $s$  is related to the rate constants of the reaction of  $R$ - and  $S$ -enantiomers,  $k_R$  and  $k_S$ , respectively, by  $s = k_R/k_S$ , for  $k_R > k_S$ .

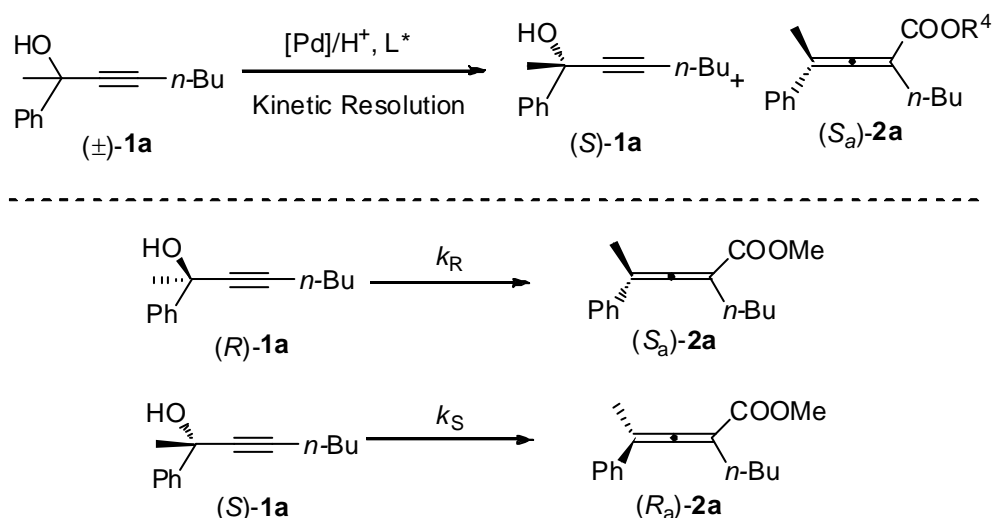

Basically,  $s$  can be established by the following equation for a first order reaction, in which  $C$  is the conversion and  $ee$  is the enantiomeric excess value of recovered substrate:

$$s = \frac{\ln [(1-C)(1-ee)]}{\ln [(1-C)(1+ee)]}$$

Besides,  $C$  can be calculated from the enantiomeric excess values of recovered substrate and product,  $ee$  and  $ee'$ , respectively, through the equation  $C = ee/(ee+ee')$  if  $(R)\text{-1a}$  was stereospecifically transferred to  $(S_a)\text{-2a}$  and  $(S)\text{-1a}$  was completely transferred to  $(R_a)\text{-2a}$  in this kinetic resolution process.

However, in the current study, when  $(R)\text{-1a}$  was introduced into the standard reaction conditions with 98%  $ee$ , the product was obtained with only 90%  $ee$ , which makes the equation mentioned before not suitable here, thus, the conversion was determined by  $^1\text{H}$  NMR analysis.

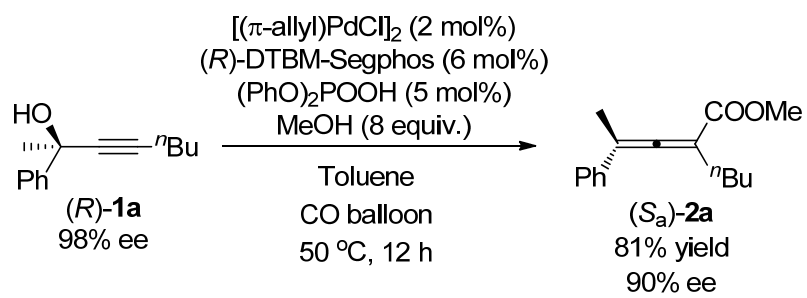

Table S1 Solvent effect in this kinetic resolution process <sup>a</sup>

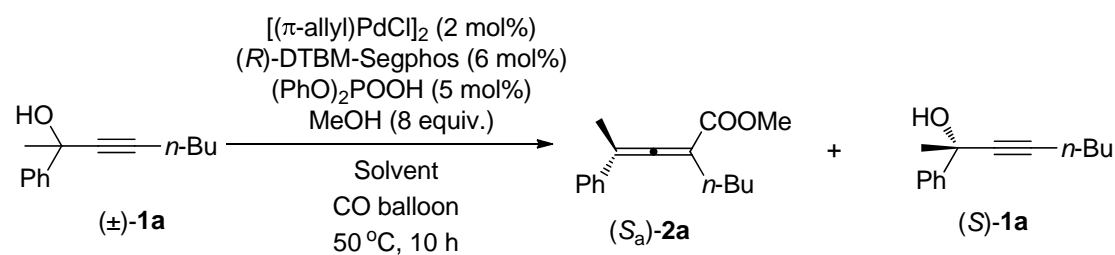

| entry          | Solvent            | <b>(S<sub>a</sub>)-2a</b> |                        | Recovery of <b>1a</b>         |                        | <i>s</i> <sup>e</sup> |
|----------------|--------------------|---------------------------|------------------------|-------------------------------|------------------------|-----------------------|
|                |                    | Yield<br>/ % <sup>b</sup> | ee<br>/ % <sup>c</sup> | NMR Yield<br>/ % <sup>d</sup> | ee<br>/ % <sup>c</sup> |                       |
| 1              | toluene            | 60                        | 48                     | 36 (35)                       | 99                     | 16.9                  |
| 2              | 1,4-dioxane        | 21                        | 49                     | 74 (73)                       | 25                     | 7.6                   |
| 3              | CH <sub>3</sub> CN | -                         | -                      | 100 (-)                       | -                      | -                     |
| 4              | DME                | -                         | -                      | 100 (-)                       | -                      | -                     |
| 5              | THF                | -                         | -                      | 99 (-)                        | -                      | -                     |
| 6 <sup>f</sup> | toluene            | -                         | -                      | 100 (-)                       | -                      | -                     |

<sup>a</sup> Reaction conditions: **(±)-1a** (0.2 mmol),  $[(\pi\text{-allyl})\text{PdCl}]_2$  (2 mol%), (*R*)-DTBM-Segphos (6 mol%),  $(\text{PhO})_2\text{POOH}$  (5 mol%), and MeOH (8 equiv.) in toluene (2 mL) at 50 °C under 1 atm of CO unless otherwise noted, DME = 1,2-dimethoxyethane, THF = tetrahydrofuran. <sup>b</sup> Isolated yields. <sup>c</sup> ee values of 2,3-allenoates and chiral propargylic alcohols were determined by HPLC. <sup>d</sup> NMR yields were determined by <sup>1</sup>H NMR analysis using 1,3,5-trimethylbenzene as the internal standard, the data in the parenthesis are isolated yields based on **(±)-1a**. <sup>e</sup>  $s = k_{\text{fast}}/k_{\text{slow}} = \ln[(\text{recovery})(1-\text{ee})]/\ln[(\text{recovery})(1+\text{ee})]$ , (recovery) is the recovery of **1a** determined by <sup>1</sup>H NMR analysis, ee is the enantionmeric excesses value of recovered substrate. <sup>f</sup> 4 mol% PdCl<sub>2</sub> was used instead of 2 mol%  $[(\pi\text{-allyl})\text{PdCl}]_2$ .

Table S2 Screening of reaction temperature in the kinetic resolution process <sup>a</sup>

| <div style="text-align: center;"> <math display="block">  \begin{array}{c}  [(\pi\text{-allyl})\text{PdCl}]_2 \text{ (2 mol\%)} \\  (R)\text{-DTBM-Segphos (6 mol\%)} \\  (\text{PhO})_2\text{POOH (5 mol\%)} \\  \text{MeOH (8 equiv.)} \\  \text{HO}-\text{C}(\text{Ph})\equiv\text{C}-n\text{-Bu} \xrightarrow{\text{Toluene, CO balloon, 10 h}} \text{Ph}-\text{C}(\text{H})(\text{COOMe})\equiv\text{C}-n\text{-Bu} + \text{HO}-\text{C}(\text{Ph})\equiv\text{C}-n\text{-Bu} \\  (\pm)\text{-1a} \qquad\qquad\qquad (S_a)\text{-2a} \qquad\qquad\qquad (S)\text{-1a}  \end{array}  </math> </div> |        |                           |                        |                                  |                        |                |
|---------------------------------------------------------------------------------------------------------------------------------------------------------------------------------------------------------------------------------------------------------------------------------------------------------------------------------------------------------------------------------------------------------------------------------------------------------------------------------------------------------------------------------------------------------------------------------------------------------|--------|---------------------------|------------------------|----------------------------------|------------------------|----------------|
| entry                                                                                                                                                                                                                                                                                                                                                                                                                                                                                                                                                                                                   | T / °C | (S <sub>a</sub> )-2a      |                        | Recovery of 1a                   |                        |                |
|                                                                                                                                                                                                                                                                                                                                                                                                                                                                                                                                                                                                         |        | Yield<br>/ % <sup>b</sup> | ee<br>/ % <sup>c</sup> | NMR<br>Yield<br>/ % <sup>d</sup> | ee<br>/ % <sup>c</sup> | s <sup>e</sup> |
| 1                                                                                                                                                                                                                                                                                                                                                                                                                                                                                                                                                                                                       | 40     | 41                        | 78                     | 53 (50)                          | 78                     | 36.8           |
| 2                                                                                                                                                                                                                                                                                                                                                                                                                                                                                                                                                                                                       | 45     | 52                        | 54                     | 39 (40)                          | 91                     | 11.4           |
| 3 <sup>f</sup>                                                                                                                                                                                                                                                                                                                                                                                                                                                                                                                                                                                          | 50     | 60                        | 48                     | 36 (35)                          | 99                     | 16.9           |
| 4                                                                                                                                                                                                                                                                                                                                                                                                                                                                                                                                                                                                       | 55     | 72                        | 38                     | 14 (13)                          | 99                     | 5.1            |

<sup>a</sup> Reaction conditions: (±)-**1a** (0.5 mmol), [(π-allyl)PdCl]<sub>2</sub> (2 mol%), (R)-DTBM-Segphos (6 mol%), (PhO)<sub>2</sub>POOH (5 mol%), and MeOH (8 equiv.) in toluene (2.5 mL) under 1 atm of CO unless otherwise noted. <sup>b</sup> Isolated yields. <sup>c</sup> ee values of 2,3-allenoates and chiral propargylic alcohols were determined by HPLC. <sup>d</sup> NMR yields were determined by <sup>1</sup>H NMR analysis using 1,3,5-trimethylbenzene or dibromomethane as the internal standard, the data in the parenthesis are isolated yields based on (±)-**1a**. <sup>e</sup>  $s = k_{\text{fast}}/k_{\text{slow}} = \ln[(\text{recovery})(1-\text{ee})]/\ln[(\text{recovery})(1+\text{ee})]$ , (recovery) is the recovery of **1a** determined by <sup>1</sup>H NMR analysis, ee is the enantioselective excess value of recovered substrate. <sup>f</sup> The reaction was carried out in 0.2 mmol scale.

Table S3 Screening of phosphoric acid and alcohol in the kinetic resolution process <sup>a</sup>

| $  \begin{array}{c}  \text{HO} \\    \\  \text{Ph}-\text{C} \equiv \text{C}-n\text{-Bu} \\  (\pm)\text{-1a}  \end{array}  \xrightarrow[\text{Toluene, CO balloon, 50 }^\circ\text{C, 10 h}]{\begin{array}{c} [(\pi\text{-allyl})\text{PdCl}]_2 \text{ (2 mol\%)} \\ (R)\text{-DTBM-Segphos (6 mol\%)} \\ [\text{POOH}] \text{ (5 mol\%)} \\ \text{ROH (8 equiv.)} \end{array}}  \begin{array}{c}  \text{Ph}-\text{C} \equiv \text{C}-\text{C}(\text{COOR})=n\text{-Bu} \\  (S_a)\text{-2}  \end{array}  +  \begin{array}{c}  \text{HO} \\    \\  \text{Ph}-\text{C} \equiv \text{C}-n\text{-Bu} \\  (S)\text{-1a}  \end{array}  $ |                           |                   |                           |                        |                                  |                        |                |
|-----------------------------------------------------------------------------------------------------------------------------------------------------------------------------------------------------------------------------------------------------------------------------------------------------------------------------------------------------------------------------------------------------------------------------------------------------------------------------------------------------------------------------------------------------------------------------------------------------------------------------------|---------------------------|-------------------|---------------------------|------------------------|----------------------------------|------------------------|----------------|
| <div style="display: flex; justify-content: space-around; align-items: center;"> <div style="text-align: center;"> 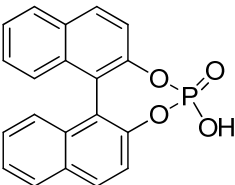 <p>BINOL-[PO<sub>2</sub>H]</p> </div> <div style="text-align: center;"> 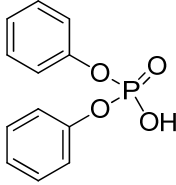 <p>(PhO)<sub>2</sub>POOH</p> </div> <div style="text-align: center;"> 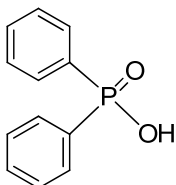 <p>Ph<sub>2</sub>POOH</p> </div> </div>                                                                  |                           |                   |                           |                        |                                  |                        |                |
| entry                                                                                                                                                                                                                                                                                                                                                                                                                                                                                                                                                                                                                             | [POOH]                    | ROH               | (S <sub>a</sub> )-2       |                        | Recovery of <b>1a</b>            |                        |                |
|                                                                                                                                                                                                                                                                                                                                                                                                                                                                                                                                                                                                                                   |                           |                   | Yield<br>/ % <sup>b</sup> | ee<br>/ % <sup>c</sup> | NMR<br>Yield<br>/ % <sup>d</sup> | ee<br>/ % <sup>c</sup> | s <sup>e</sup> |
| 1                                                                                                                                                                                                                                                                                                                                                                                                                                                                                                                                                                                                                                 | BINOL-[PO <sub>2</sub> H] | MeOH              | 62                        | 53                     | 37 (34)                          | 95                     | 12.2           |
| 2                                                                                                                                                                                                                                                                                                                                                                                                                                                                                                                                                                                                                                 | Ph <sub>2</sub> POOH      | MeOH              | 48                        | 51                     | 50 (47)                          | 82                     | 25.5           |
| 3 <sup>f</sup>                                                                                                                                                                                                                                                                                                                                                                                                                                                                                                                                                                                                                    | (PhO) <sub>2</sub> POOH   | MeOH              | 60                        | 48                     | 36 (35)                          | 99                     | 16.9           |
| 4                                                                                                                                                                                                                                                                                                                                                                                                                                                                                                                                                                                                                                 | (PhO) <sub>2</sub> POOH   | EtOH              | 59                        | 41                     | 22 (20)                          | 99                     | 7.4            |
| 5                                                                                                                                                                                                                                                                                                                                                                                                                                                                                                                                                                                                                                 | (PhO) <sub>2</sub> POOH   | <sup>i</sup> PrOH | 34                        | 58                     | 34 (31)                          | 99                     | 12.0           |

<sup>a</sup> Reaction conditions: (±)-**1a** (0.5 mmol), [(π-allyl)PdCl]<sub>2</sub> (2 mol%), (R)-DTBM-Segphos (6 mol%), (PhO)<sub>2</sub>POOH (5 mol%), and MeOH (8 equiv.) in toluene (2.5 mL) at 50 °C under 1 atm of CO unless otherwise noted. <sup>b</sup> Isolated yields.

<sup>c</sup> ee values of 2,3-allenoates and chiral propargylic alcohols were determined by HPLC. <sup>d</sup> NMR yields were determined by <sup>1</sup>H NMR analysis using 1,3,5-trimethylbenzene or dibromomethane as the internal standard, the data in the parenthesis are isolated yields based on (±)-**1a**. <sup>e</sup>  $s = k_{\text{fast}}/k_{\text{slow}} = \ln[(\text{recovery})(1-\text{ee})]/\ln[(\text{recovery})(1+\text{ee})]$ , (recovery) is the recovery of **1a** determined by <sup>1</sup>H NMR analysis, ee is the enantiomeric excesses value of recovered substrate. <sup>f</sup> The reaction was carried out in 0.2 mmol scale.

## Experimental details and analytical data

### 1. Preparation of optically active tertiary propargylic alcohols and tetra-substituted allenates

#### (1) Preparation of (*S<sub>a</sub>*)-methyl 4-phenyl-2-butyl-2,3-pentadienoate ((*S<sub>a</sub>*)-2a) (zwl-11-41-1) and (*S*)-2-phenyloct-3-yn-2-ol ((*S*)-1a) (zwl-11-41-2)

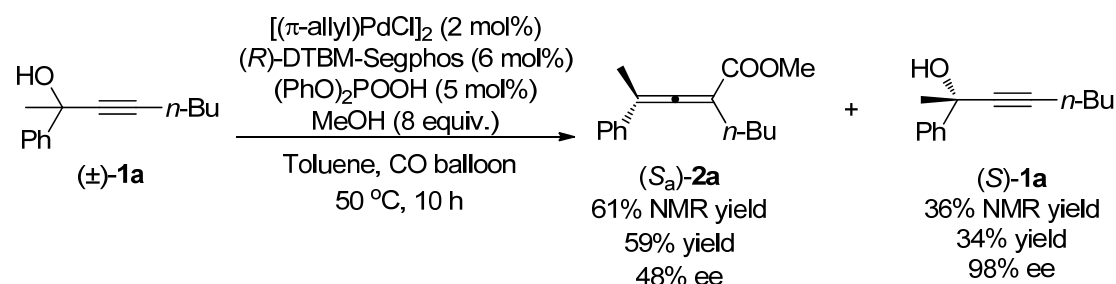

**Typical Procedure:** To a flame-dried Schlenk tube were added  $[(\pi\text{-allyl})\text{PdCl}]_2$  (7.6 mg, 0.02 mmol), (*R*)-DTBM-Segphos (72.3 mg, 0.06 mmol),  $(\text{PhO})_2\text{POOH}$  (12.4 mg, 0.05 mmol), ( $\pm$ )-**1a** (202.4 mg, 1 mmol), MeOH (256.1 mg, 8 mmol), and toluene (5 mL) sequentially under argon. The resulting mixture was then frozen with a liquid nitrogen bath, degassed to remove the argon inside completely, and refilled with CO by a balloon of CO for three times. Then the liquid nitrogen bath was removed and the mixture was warmed up to room temperature and vigorously stirred at 50 °C with a balloon of CO for 10 h. The reaction mixture was then diluted with 5 mL of ethyl acetate, filtered through a short column silica gel (3.5 cm), eluted with ethyl acetate (20 mL), and concentrated. The residue was purified by column chromatography on silica gel to afford (*S<sub>a</sub>*)-**2a** (144.2 mg, 59%) as an oil and (*S*)-**1a**<sup>3</sup> (68.8 mg, 34%) as an oil [eluent: petroleum ether/ethyl ether/dichloromethane = 100/1/1 (0.5 L) to petroleum ether/ethyl ether/dichloromethane = 20/1/1 (0.5 L)].

(*S<sub>a</sub>*)-**2a**: 48% ee (HPLC conditions: Regis (*S,S*) Whelk-O column, hexane/*i*-PrOH = 200/1, 1.0 mL/min,  $\lambda$  = 214 nm,  $t_R$  (major) = 8.0 min,  $t_R$  (minor) = 9.3 min);  $[\alpha]_D^{22}$  = +9.1 ( $c$  = 1.57,  $\text{CHCl}_3$ );  $^1\text{H}$  NMR (400 MHz,  $\text{CDCl}_3$ ):  $\delta$  = 7.43-7.30 (m, 4 H, Ar-H), 7.28-7.20 (m, 1 H, Ar-H), 3.72 (s, 3 H,  $\text{OCH}_3$ ), 2.35 (t,  $J$  = 7.6 Hz, 2 H,  $\text{CH}_2$ ), 2.18 (s, 3 H,  $\text{CH}_3$ ), 1.51-1.41 (m, 2 H,  $\text{CH}_2$ ), 1.41-1.30 (m, 2 H,  $\text{CH}_2$ ), 0.88 (t,  $J$  = 7.4 Hz, 3 H,  $\text{CH}_3$  from *n*-Bu);  $^{13}\text{C}$  NMR (100 MHz,  $\text{CDCl}_3$ ):  $\delta$  = 211.1, 167.8, 135.4, 128.5, 127.3,

125.9, 104.6, 102.0, 52.1, 30.2, 28.7, 22.3, 16.4, 13.9; MS (70 eV, EI)  $m/z$  (%): 244 ( $M^+$ , 1.63), 143 (100); IR (neat):  $\nu$  = 2954, 2928, 2860, 1943, 1712, 1494, 1434, 1262, 1206, 1119, 1087, 1067, 1026  $\text{cm}^{-1}$ ; HRMS calcd for  $\text{C}_{16}\text{H}_{20}\text{O}_2$  [ $M^+$ ]: 244.1463, found: 244.1466.

(*S*)-**1a**:<sup>3</sup> 98% ee (HPLC conditions: OD-H column, hexane/*i*-PrOH = 200/1, 1.0 mL/min,  $\lambda$  = 214 nm,  $t_R$  (minor) = 22.9 min,  $t_R$  (major) = 26.0 min);  $[\alpha]_D^{23}$  = -0.5 ( $c$  = 1.10,  $\text{CHCl}_3$ ) [90% ee,  $[\alpha]_D^{30}$  = -0.3 ( $c$  = 1.2,  $\text{CHCl}_3$ )];<sup>2</sup>  $^1\text{H}$  NMR (400 MHz,  $\text{CDCl}_3$ ):  $\delta$  = 7.71-7.62 (m, 2 H, Ar-H), 7.41-7.31 (m, 2 H, Ar-H), 7.31-7.23 (m, 1 H, Ar-H), 2.38-2.22 (m, 3 H, OH and  $\text{CH}_2$ ), 1.74 (s, 3 H,  $\text{CH}_3$ ), 1.62-1.49 (m, 2 H,  $\text{CH}_2$ ), 1.49-1.37 (m, 2 H,  $\text{CH}_2$ ), 0.93 (t,  $J$  = 7.4 Hz, 3 H,  $\text{CH}_3$  from *n*-Bu);  $^{13}\text{C}$  NMR (100 MHz,  $\text{CDCl}_3$ ):  $\delta$  = 146.2, 128.2, 127.5, 124.9, 85.7, 83.7, 70.0, 33.5, 30.7, 22.0, 18.4, 13.6; MS (70 eV, EI)  $m/z$  (%): 202 ( $M^+$ , 1.18), 187 (100); IR (neat):  $\nu$  = 3393, 2958, 2931, 2872, 1493, 1447, 1365, 1327, 1232, 1180, 1093, 1063, 1027  $\text{cm}^{-1}$ ; Raman :  $\nu$  = 2240  $\text{cm}^{-1}$ .

The following compounds were prepared according to **Typical Procedure**.

## (2) Preparation of (*S*)-2-phenyloct-3-yn-2-ol ((*S*)-**1a**) (zwl-10-130)

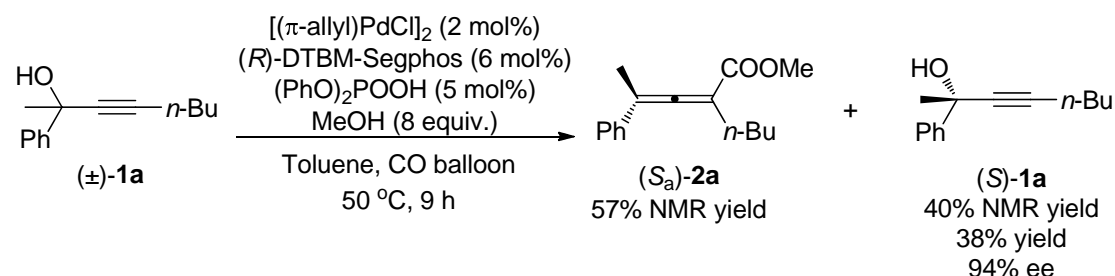

The reaction of  $[(\pi\text{-allyl})\text{PdCl}]_2$  (7.5 mg, 0.02 mmol), (*R*)-DTBM-Segphos (70.9 mg, 0.06 mmol),  $(\text{PhO})_2\text{POOH}$  (12.6 mg, 0.05 mmol), ( $\pm$ )-**1a** (202.2 mg, 1 mmol), MeOH (256.6 mg, 8.0 mmol), and toluene (5 mL) left (*S*)-**1a** (76.8 mg, 38%) as an oil [eluent: petroleum ether/ethyl ether/dichloromethane = 50/1/1 (0.5 L) to petroleum ether/ethyl ether/dichloromethane = 20/1/1 (0.5 L)]: 94% ee (HPLC conditions: OD-H column, hexane/*i*-PrOH = 200/1, 1.0 mL/min,  $\lambda$  = 214 nm,  $t_R$  (minor) = 21.2 min,  $t_R$  (major) = 24.9 min);  $[\alpha]_D^{21}$  = -0.4 ( $c$  = 1.00,  $\text{CHCl}_3$ ) [90% ee,  $[\alpha]_D^{30}$  = -0.3 ( $c$  = 1.2,  $\text{CHCl}_3$ )];<sup>3</sup>  $^1\text{H}$  NMR (400 MHz,  $\text{CDCl}_3$ ):  $\delta$  = 7.69-7.62 (m, 2 H, Ar-H), 7.40-7.32 (m, 2 H, Ar-H), 7.32-7.24 (m, 1 H, Ar-H), 2.32-2.25 (m, 3 H, OH and  $\text{CH}_2$ ), 1.74 (s, 3 H,

CH<sub>3</sub>), 1.61-1.49 (m, 2 H, CH<sub>2</sub>), 1.49-1.38 (m, 2 H, CH<sub>2</sub>), 0.93 (t, *J* = 7.4 Hz, 3 H, CH<sub>3</sub> from *n*-Bu); <sup>13</sup>C NMR (100 MHz, CDCl<sub>3</sub>): δ = 146.2, 128.1, 127.5, 124.9, 85.6, 83.6, 70.0, 33.5, 30.7, 22.0, 18.4, 13.6.

### (3) Preparation of (*S*)-5-methyl-2-phenylhex-3-yn-2-ol ((*S*)-1b) (zwl-11-51)

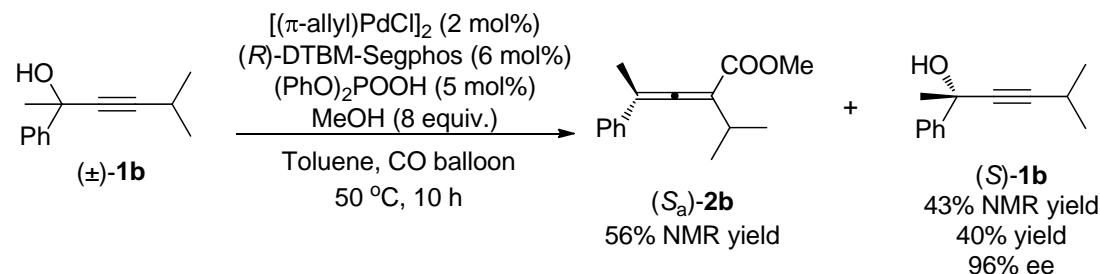

The reaction of [( $\pi$ -allyl)PdCl]<sub>2</sub> (7.6 mg, 0.02 mmol), (*R*)-DTBM-Segphos (72.4 mg, 0.06 mmol), (PhO)<sub>2</sub>POOH (12.5 mg, 0.05 mmol), (±)-1b (188.4 mg, 1 mmol), MeOH (256.1 mg, 8 mmol), and toluene (5 mL) left (*S*)-1b (75.4 mg, 40%) as an oil [eluent: petroleum ether/ethyl ether/dichloromethane = 50/1/1 (0.5 L) to petroleum ether/ethyl ether/dichloromethane = 20/1/1 (0.5 L)]: 96% ee (HPLC conditions: Regis (*R,R*) Whelk-O column, hexane/*i*-PrOH = 100/1, 1.0 mL/min, λ = 214 nm, *t<sub>R</sub>* (minor) = 8.1 min, *t<sub>R</sub>* (major) = 10.1 min); [α]<sub>D</sub><sup>25</sup> = +4.6 (*c* = 1.15, CHCl<sub>3</sub>); <sup>1</sup>H NMR (400 MHz, CDCl<sub>3</sub>): δ = 7.70-7.60 (m, 2 H, Ar-H), 7.41-7.31 (m, 2 H, Ar-H), 7.31-7.23 (m, 1 H, Ar-H), 2.72-2.58 (m, 1 H, CH), 2.43-2.32 (m, 1 H, OH), 1.73 (s, 3 H, CH<sub>3</sub>), 1.21 (d, *J* = 7.2 Hz, 6 H, 2 x CH<sub>3</sub>); <sup>13</sup>C NMR (100 MHz, CDCl<sub>3</sub>): δ = 146.2, 128.1, 127.4, 124.9, 91.0, 82.9, 69.9, 33.6, 22.9, 20.5; MS (70 eV, EI) *m/z* (%): 188 (M<sup>+</sup>, 1.70), 173 (100); IR (neat): ν = 3292, 2972, 2926, 2872, 2241, 1447, 1366, 1318, 1234, 1186, 1089, 1048 cm<sup>-1</sup>; HRMS calcd for C<sub>13</sub>H<sub>16</sub>O [M<sup>+</sup>]: 188.1201, found: 188.1203.

### (4) Preparation of (*S*)-8-chloro-2-phenyloct-3-yn-2-ol ((*S*)-1c) (zwl-11-53)

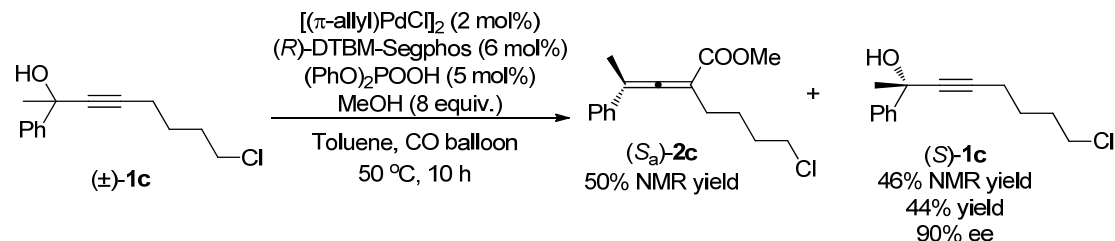

The reaction of [( $\pi$ -allyl)PdCl]<sub>2</sub> (7.4 mg, 0.02 mmol), (*R*)-DTBM-Segphos (72.3 mg, 0.06 mmol), (PhO)<sub>2</sub>POOH (12.6 mg, 0.05 mmol), (±)-1c (236.6 mg, 1 mmol), MeOH (256.1 mg, 8 mmol), and toluene (5 mL) left (*S*)-1c (104.1 mg, 44%) as an oil

[eluent: petroleum ether/ethyl ether/dichloromethane = 50/1/1 (0.5 L) to petroleum ether/ethyl ether/dichloromethane = 20/1/1 (0.5 L)]: 90% ee (HPLC conditions: Regis (*R,R*) Whelk-O column, hexane/*i*-PrOH = 100/1, 1.0 mL/min,  $\lambda$  = 214 nm,  $t_R$  (minor) = 16.0 min,  $t_R$  (major) = 20.4 min);  $[\alpha]_D^{24}$  = +0.7 ( $c$  = 1.69, CHCl<sub>3</sub>); <sup>1</sup>H NMR (400 MHz, CDCl<sub>3</sub>):  $\delta$  = 7.69-7.59 (m, 2 H, Ar-H), 7.42-7.32 (m, 2 H, Ar-H), 7.32-7.22 (m, 1 H, Ar-H), 3.57 (t,  $J$  = 6.6 Hz, 2 H, CH<sub>2</sub>), 2.38 (brs, 1 H, OH), 2.33 (t,  $J$  = 6.8 Hz, 2 H, CH<sub>2</sub>), 1.98-1.83 (m, 2 H, CH<sub>2</sub>), 1.80-1.60 (m, 5 H, CH<sub>2</sub> and CH<sub>3</sub>); <sup>13</sup>C NMR (100 MHz, CDCl<sub>3</sub>):  $\delta$  = 146.0, 128.2, 127.5, 124.9, 84.6, 84.4, 70.0, 44.5, 33.4, 31.5, 25.7, 18.0; MS (70 eV, EI)  $m/z$  (%): 238 ( $M^+$ (<sup>37</sup>Cl), 0.45), 236 ( $M^+$ (<sup>35</sup>Cl), 1.30), 221 (100); IR (neat):  $\nu$  = 3394, 2938, 2865, 2238, 1492, 1444, 1323, 1230, 1174, 1066 cm<sup>-1</sup>; HRMS calcd for C<sub>14</sub>H<sub>17</sub>O<sup>35</sup>Cl [ $M^+$ ]: 236.0968, found: 236.0970.

#### (5) Preparation of (*S*)-2-(4-chlorophenyl)oct-3-yn-2-ol ((*S*)-**1d**) (zwl-8-72)

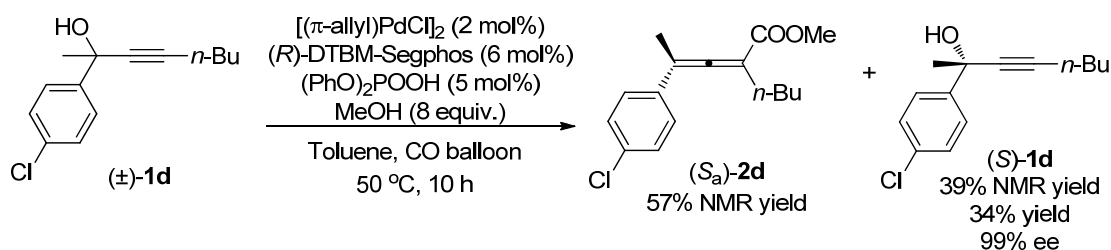

The reaction of  $[(\pi\text{-allyl})\text{PdCl}]_2$  (7.5 mg, 0.02 mmol), (*R*)-DTBM-Segphos (70.8 mg, 0.06 mmol), (PhO)<sub>2</sub>POOH (12.6 mg, 0.05 mmol), (±)-**1d** (236.7 mg, 1 mmol), MeOH (256.1 mg, 8 mmol), and toluene (5 mL) left (*S*)-**1d** (80.4 mg, 34%) as an oil [eluent: petroleum ether/ethyl acetate = 100/1 (1.5 L) to petroleum ether/ethyl acetate = 50/1]: 99% ee (HPLC conditions: Regis (*R,R*) Whelk-O column, hexane/*i*-PrOH = 200/1, 1.0 mL/min,  $\lambda$  = 214 nm,  $t_R$  (minor) = 9.2 min,  $t_R$  (major) = 11.7 min);  $[\alpha]_D^{20}$  = -0.6 ( $c$  = 1.20, CHCl<sub>3</sub>); <sup>1</sup>H NMR (400 MHz, CDCl<sub>3</sub>):  $\delta$  = 7.61-7.54 (m, 2 H, Ar-H), 7.34-7.28 (m, 2 H, Ar-H), 2.42-2.38 (m, 1 H, OH), 2.27 (t,  $J$  = 7.2 Hz, 2 H, CH<sub>2</sub>), 1.71 (s, 3 H, CH<sub>3</sub>), 1.57-1.47 (m, 2 H, CH<sub>2</sub>), 1.47-1.37 (m, 2 H, CH<sub>2</sub>), 0.92 (t,  $J$  = 7.4 Hz, 3 H, CH<sub>3</sub> from *n*-Bu); <sup>13</sup>C NMR (100 MHz, CDCl<sub>3</sub>):  $\delta$  = 144.8, 133.2, 128.2, 126.5, 86.0, 83.3, 69.6, 33.6, 30.6, 22.0, 18.3, 13.6; MS (70 eV, EI)  $m/z$  (%): 238 ( $M^+$ (<sup>37</sup>Cl), 0.67), 236 ( $M^+$ (<sup>35</sup>Cl), 1.88), 221 (100); IR (neat):  $\nu$  = 3357, 2958, 2932, 2872, 1488, 1399, 1366, 1327, 1229, 1177, 1090, 1054, 1014 cm<sup>-1</sup>; HRMS calcd for C<sub>14</sub>H<sub>17</sub>O<sup>35</sup>Cl

[M<sup>+</sup>]: 236.0968, found: 236.0970.

**(6) Preparation of (S)-2-(4-bromophenyl)dec-3-yn-2-ol ((S)-1e) (zwl-8-189)**

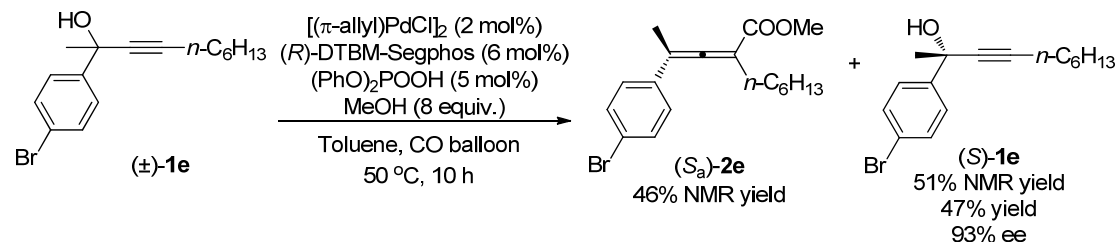

The reaction of [(π-allyl)PdCl]<sub>2</sub> (7.5 mg, 0.02 mmol), (R)-DTBM-Segphos (70.9 mg, 0.06 mmol), (PhO)<sub>2</sub>POOH (12.6 mg, 0.05 mmol), (±)-1e (309.1 mg, 1 mmol), MeOH (256.1 mg, 8 mmol), and toluene (5 mL) left (S)-1e (145.3 mg, 47%) as an oil [eluent: petroleum ether/ethyl acetate = 100/1 (1.5 L) to petroleum ether/ethyl acetate = 50/1]: 93% ee (HPLC conditions: Regis (R,R) Whelk-O column, hexane/*i*-PrOH = 200/1, 1.0 mL/min, λ = 214 nm, *t*<sub>R</sub> (minor) = 8.8 min, *t*<sub>R</sub> (major) = 11.8 min); [α]<sub>D</sub><sup>20</sup> = -1.6 (*c* = 1.21, CHCl<sub>3</sub>); <sup>1</sup>H NMR (400 MHz, CDCl<sub>3</sub>): δ = 7.55-7.49 (m, 2 H, Ar-H), 7.48-7.42 (m, 2 H, Ar-H), 2.43-2.35 (m, 1 H, OH), 2.25 (t, *J* = 7.2 Hz, 2 H, CH<sub>2</sub>), 1.70 (s, 3 H, CH<sub>3</sub>), 1.58-1.48 (m, 2 H, CH<sub>2</sub>), 1.45-1.35 (m, 2 H, CH<sub>2</sub>), 1.35-1.22 (m, 4 H, 2 x CH<sub>2</sub>), 0.89 (t, *J* = 6.8 Hz, 3 H, CH<sub>3</sub> from *n*-C<sub>6</sub>H<sub>13</sub>); <sup>13</sup>C NMR (100 MHz, CDCl<sub>3</sub>): δ = 145.3, 131.2, 126.9, 121.4, 86.1, 83.2, 69.6, 33.6, 31.2, 28.5, 22.5, 18.7, 14.0; MS (70 eV, EI) *m/z* (%): 310 (M<sup>+</sup>(<sup>81</sup>Br), 2.31), 308 (M<sup>+</sup>(<sup>79</sup>Br), 2.12), 293 (100); IR (neat): ν = 3385, 2955, 2929, 2858, 1681, 1589, 1485, 1466, 1394, 1365, 1271, 1228, 1177, 1074, 1010 cm<sup>-1</sup>; HRMS calcd for C<sub>16</sub>H<sub>21</sub>O<sup>79</sup>Br [M<sup>+</sup>]: 308.0776, found: 308.0773.

**(7) Preparation of (S)-2-(2-methylphenyl)dec-3-yn-2-ol ((S)-1f) (zwl-8-187)**

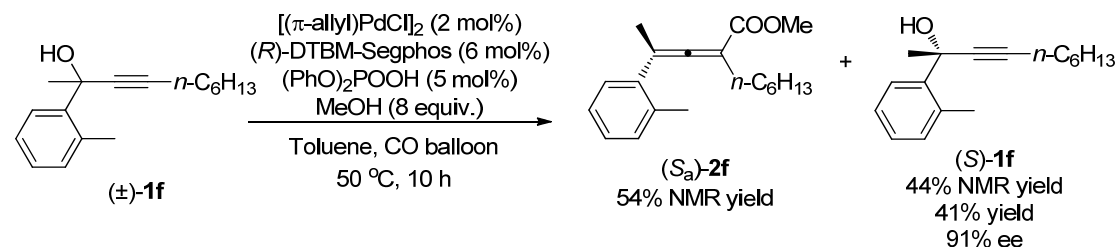

The reaction of [(π-allyl)PdCl]<sub>2</sub> (7.6 mg, 0.02 mmol), (R)-DTBM-Segphos (70.9 mg, 0.06 mmol), (PhO)<sub>2</sub>POOH (12.6 mg, 0.05 mmol), (±)-1f (244.1 mg, 1 mmol), MeOH (256.1 mg, 8 mmol), and toluene (5 mL) left (S)-1f (100.0 mg, 41%) as an oil [eluent: petroleum ether/ethyl acetate = 100/1 (1.5 L) to petroleum ether/ethyl acetate

= 50/1]: 91% ee (HPLC conditions: OJ-H column, hexane/*i*-PrOH = 200/1, 1.0 mL/min,  $\lambda$  = 214 nm,  $t_R$  (major) = 9.7 min,  $t_R$  (minor) = 10.4 min);  $[\alpha]_D^{20}$  = -2.0 ( $c$  = 1.70, CHCl<sub>3</sub>); <sup>1</sup>H NMR (400 MHz, CDCl<sub>3</sub>):  $\delta$  = 7.72-7.65 (m, 1 H, Ar-H), 7.20-7.12 (m, 3 H, Ar-H), 2.61 (s, 3 H, Ar-CH<sub>3</sub>), 2.44 (s, 1 H, OH), 2.22 (t,  $J$  = 7.4 Hz, 2 H, CH<sub>2</sub>), 1.79 (s, 3 H, CH<sub>3</sub>), 1.56-1.45 (m, 2 H, CH<sub>2</sub>), 1.45-1.20 (m, 6 H, 3 x CH<sub>2</sub>), 0.88 (t,  $J$  = 7.2 Hz, 3 H, CH<sub>3</sub> from *n*-C<sub>6</sub>H<sub>13</sub>); <sup>13</sup>C NMR (100 MHz, CDCl<sub>3</sub>):  $\delta$  = 142.8, 135.6, 132.2, 127.4, 125.6, 124.9, 85.3, 84.0, 69.7, 31.3, 31.1, 28.6, 28.5, 22.5, 21.2, 18.7, 14.0; MS (70 eV, EI)  $m/z$  (%): 244 ( $M^+$ , 2.80), 229 (100); IR (neat):  $\nu$  = 3406, 2955, 2930, 2858, 1484, 1456, 1367, 1328, 1287, 1223, 1164, 1131, 1079, 1047 cm<sup>-1</sup>; HRMS calcd for C<sub>17</sub>H<sub>24</sub>O [ $M^+$ ]: 244.1827, found: 244.1824.

#### (8) Preparation of (*S*)-2-(3-methylphenyl)dec-3-yn-2-ol ((*S*)-**1g**) (zwl-10-129)

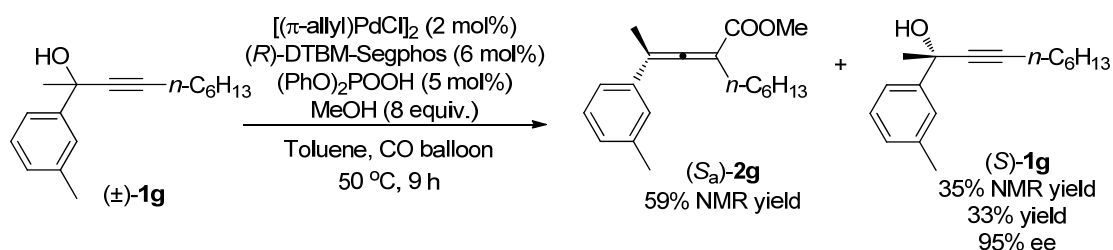

The reaction of  $[(\pi\text{-allyl})\text{PdCl}]_2$  (7.6 mg, 0.02 mmol), (*R*)-DTBM-Segphos (70.9 mg, 0.06 mmol), (PhO)<sub>2</sub>POOH (12.6 mg, 0.05 mmol), ( $\pm$ )-**1g** (244.2 mg, 1 mmol), MeOH (256.4 mg, 8 mmol), and toluene (5 mL) left (*S*)-**1g** (80.6 mg, 33%) as an oil [eluent: petroleum ether/ethyl ether/dichloromethane = 50/1/1 (0.5 L) to petroleum ether/ethyl ether/dichloromethane = 20/1/1 (0.5 L)]: 95% ee (HPLC conditions: Regis (*S,S*) Whelk-O column, hexane/*i*-PrOH = 200/1, 1.0 mL/min,  $\lambda$  = 214 nm,  $t_R$  (major) = 8.5 min,  $t_R$  (minor) = 10.7 min);  $[\alpha]_D^{22}$  = -1.3 ( $c$  = 0.98, CHCl<sub>3</sub>); <sup>1</sup>H NMR (400 MHz, CDCl<sub>3</sub>):  $\delta$  = 7.51-7.41 (m, 2 H, Ar-H), 7.29-7.19 (m, 1 H, Ar-H), 7.08 (d,  $J$  = 7.6 Hz, 1 H, Ar-H), 2.37 (s, 3 H, Ar-CH<sub>3</sub>), 2.32 (brs, 1 H, OH), 2.27 (t,  $J$  = 7.2 Hz, 2 H, CH<sub>2</sub>), 1.73 (s, 3 H, CH<sub>3</sub>), 1.60-1.49 (m, 2 H, CH<sub>2</sub>), 1.48-1.37 (m, 2 H, CH<sub>2</sub>), 1.37-1.23 (m, 4 H, 2 x CH<sub>2</sub>), 0.90 (t,  $J$  = 6.8 Hz, 3 H, CH<sub>3</sub> from *n*-C<sub>6</sub>H<sub>13</sub>); <sup>13</sup>C NMR (100 MHz, CDCl<sub>3</sub>):  $\delta$  = 146.1, 137.8, 128.2, 128.1, 125.6, 122.0, 85.6, 83.8, 70.0, 33.5, 31.3, 28.6, 28.5, 22.5, 21.5, 18.37, 14.0; MS (70 eV, EI)  $m/z$  (%): 244 ( $M^+$ , 2.27), 229 (100); IR (neat):  $\nu$  = 3403, 2955, 2929, 2858, 1607, 1485, 1457, 1365, 1329, 1255, 1199, 1158,

1084, 1062  $\text{cm}^{-1}$ ; HRMS calcd for  $\text{C}_{17}\text{H}_{24}\text{O}$  [ $\text{M}^+$ ]: 244.1827, found: 244.1825.

**(9) Preparation of (*S*)-2-(4-methylphenyl)oct-3-yn-2-ol ((*S*)-1h) (zwl-10-101)**

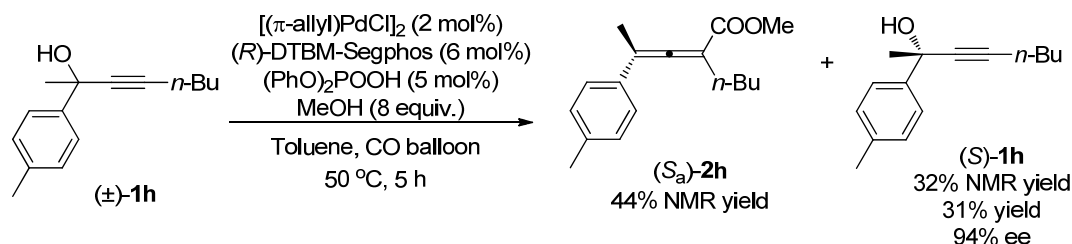

The reaction of  $[(\pi\text{-allyl})\text{PdCl}]_2$  (7.6 mg, 0.02 mmol), (*R*)-DTBM-Segphos (70.9 mg, 0.06 mmol),  $(\text{PhO})_2\text{POOH}$  (12.6 mg, 0.05 mmol), ( $\pm$ )-**1h** (216.2 mg, 1 mmol), MeOH (256.2 mg, 8 mmol), and toluene (5 mL) left (*S*)-**1h** (67.1 mg, 31%) as an oil [eluent: petroleum ether/ethyl ether/dichloromethane = 50/1/1 (0.5 L) to petroleum ether/ethyl ether/dichloromethane = 20/1/1 (0.5 L)]: 94% ee (HPLC conditions: Regis (*S,S*) Whelk-O column, hexane/*i*-PrOH = 200/1, 1.0 mL/min,  $\lambda$  = 214 nm,  $t_R$  (major) = 9.3 min,  $t_R$  (minor) = 13.0 min);  $[\alpha]_D^{23}$  = -0.4 ( $c$  = 0.96,  $\text{CHCl}_3$ );  $^1\text{H}$  NMR (400 MHz,  $\text{CDCl}_3$ ):  $\delta$  = 7.53 (d,  $J$  = 8.4 Hz, 2 H, Ar-H), 7.15 (d,  $J$  = 8.4 Hz, 2 H, Ar-H), 2.40-2.30 (m, 4 H, OH and Ar- $\text{CH}_3$ ), 2.27 (t,  $J$  = 7.2 Hz, 2 H,  $\text{CH}_2$ ), 1.72 (s, 3 H,  $\text{CH}_3$ ), 1.58-1.48 (m, 2 H,  $\text{CH}_2$ ), 1.48-1.36 (m, 2 H,  $\text{CH}_2$ ), 0.92 (t,  $J$  = 7.4 Hz, 3 H,  $\text{CH}_3$  from *n*-Bu);  $^{13}\text{C}$  NMR (100 MHz,  $\text{CDCl}_3$ ):  $\delta$  = 143.4, 137.1, 128.8, 124.9, 85.4, 83.9, 69.8, 33.4, 30.7, 21.9, 21.0, 18.4, 13.6; MS (70 eV, EI)  $m/z$  (%): 216 ( $\text{M}^+$ , 2.20), 201 (100); IR (neat):  $\nu$  = 3384, 2957, 2930, 2863, 1509, 1456, 1405, 1365, 1327, 1234, 1184, 1089, 1052, 1020  $\text{cm}^{-1}$ ; HRMS calcd for  $\text{C}_{15}\text{H}_{20}\text{O}$  [ $\text{M}^+$ ]: 216.1514, found: 216.1516.

**(10) Preparation of (*S*)-2-(2-naphthyl)oct-3-yn-2-ol ((*S*)-1i) (zwl-10-124)**

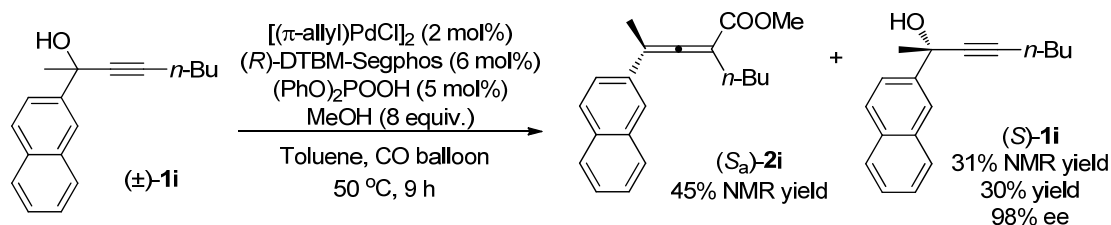

The reaction of  $[(\pi\text{-allyl})\text{PdCl}]_2$  (7.5 mg, 0.02 mmol), (*R*)-DTBM-Segphos (70.9 mg, 0.06 mmol),  $(\text{PhO})_2\text{POOH}$  (12.6 mg, 0.05 mmol), ( $\pm$ )-**1i** (252.5 mg, 1 mmol), MeOH (256.4 mg, 8 mmol), and toluene (5 mL) left (*S*)-**1i** (75.8 mg, 30%) as an oil [eluent: petroleum ether/ethyl ether/dichloromethane = 50/1/1 (0.5 L) to petroleum

ether/ethyl ether/dichloromethane = 20/1/1 (0.5 L)]: 98% ee (HPLC conditions: Regis (*S,S*) Whelk-O column, hexane/*i*-PrOH = 200/1, 1.0 mL/min,  $\lambda$  = 214 nm,  $t_R$  (major) = 22.0 min,  $t_R$  (minor) = 40.2 min);  $[\alpha]_D^{23}$  = -11.8 ( $c$  = 1.55, CHCl<sub>3</sub>); <sup>1</sup>H NMR (400 MHz, CDCl<sub>3</sub>):  $\delta$  = 8.11 (s, 1 H, Ar-H), 7.88-7.77 (m, 3 H, Ar-H), 7.77-7.70 (m, 1 H, Ar-H), 7.52-7.42 (m, 2 H, Ar-H), 2.47 (brs, 1 H, OH), 2.30 (t,  $J$  = 7.0 Hz, 2 H, CH<sub>2</sub>), 1.82 (s, 3 H, CH<sub>3</sub>), 1.63-1.51 (m, 2 H, CH<sub>2</sub>), 1.51-1.39 (m, 2 H, CH<sub>2</sub>), 0.94 (t,  $J$  = 7.2 Hz, 3 H, CH<sub>3</sub> from *n*-Bu); <sup>13</sup>C NMR (100 MHz, CDCl<sub>3</sub>):  $\delta$  = 143.5, 133.0, 132.7, 128.3, 128.0, 127.5, 126.1, 125.9, 123.6, 123.3, 85.9, 83.7, 70.1, 33.4, 30.7, 22.0, 18.4, 13.6; MS (70 eV, EI)  $m/z$  (%): 253 ( $M^+$ +1, 2.05), 252 ( $M^+$ , 7.42), 155 (100); IR (neat):  $\nu$  = 3387, 3057, 2957, 2930, 2861, 1673, 1601, 1506, 1465, 1354, 1326, 1271, 1194, 1162, 1127, 1084, 1052, 1018 cm<sup>-1</sup>; HRMS calcd for C<sub>18</sub>H<sub>20</sub>O [ $M^+$ ]: 252.1514, found: 252.1516.

#### (11) Preparation of (*S*)-2,4-diphenylbut-3-yn-2-ol ((*S*)-**1j**) (zwl-10-115)

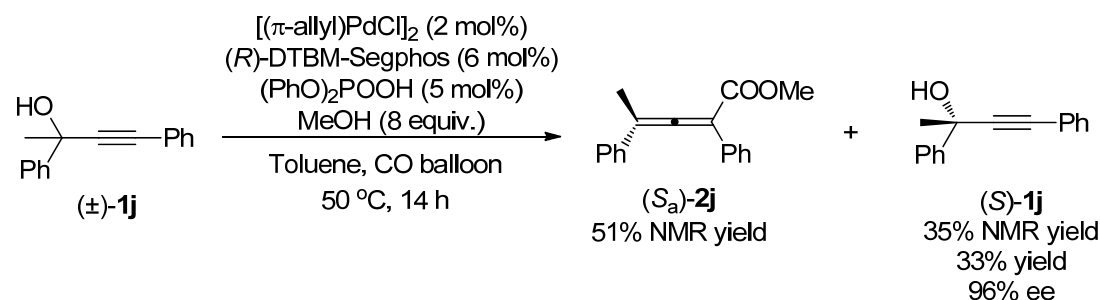

The reaction of  $[(\pi\text{-allyl})\text{PdCl}]_2$  (7.6 mg, 0.02 mmol), (*R*)-DTBM-Segphos (70.9 mg, 0.06 mmol), (PhO)<sub>2</sub>POOH (12.5 mg, 0.05 mmol), ( $\pm$ )-**1j** (222.2 mg, 1 mmol), MeOH (256.4 mg, 8 mmol), and toluene (5 mL) left (*S*)-**1j**<sup>2</sup> (73.3 mg, 33%) as an oil [eluent: petroleum ether/ethyl ether/dichloromethane = 50/1/1 (0.5 L) to petroleum ether/ethyl ether/dichloromethane = 20/1/1 (0.5 L)]: 96% ee (HPLC conditions: Regis (*S,S*) Whelk-O column, hexane/*i*-PrOH = 200/1, 1.0 mL/min,  $\lambda$  = 214 nm,  $t_R$  (major) = 17.2 min,  $t_R$  (minor) = 28.7 min);  $[\alpha]_D^{23}$  = -7.2 ( $c$  = 1.23, CHCl<sub>3</sub>) [96% ee,  $[\alpha]_D^{30}$  = -7.4 ( $c$  = 1.3, CHCl<sub>3</sub>)]<sup>2</sup>; <sup>1</sup>H NMR (400 MHz, CDCl<sub>3</sub>):  $\delta$  = 7.79-7.68 (m, 2 H, Ar-H), 7.55-7.44 (m, 2 H, Ar-H), 7.44-7.35 (m, 2 H, Ar-H), 7.35-7.26 (m, 4 H, Ar-H), 2.50 (s, 1 H, OH), 1.87 (s, 3 H, CH<sub>3</sub>); <sup>13</sup>C NMR (100 MHz, CDCl<sub>3</sub>):  $\delta$  = 145.6, 131.7, 128.4, 128.30, 128.26, 127.7, 125.0, 122.5, 92.4, 84.9, 70.3, 33.3; MS (70 eV, EI)  $m/z$  (%):

223 ( $M^+ + 1$ , 4.20), 222 ( $M^+$ , 30.84), 207 (100); IR (neat):  $\nu$  = 3298, 2978, 1597, 1488, 1442, 1402, 1365, 1270, 1212, 1140, 1088, 1073, 1050, 1027  $\text{cm}^{-1}$ .

### (12) Preparation of (*S*)-3-methyl-1-phenylhex-1-yn-3-ol ((*S*)-1k) (zwl-10-118)

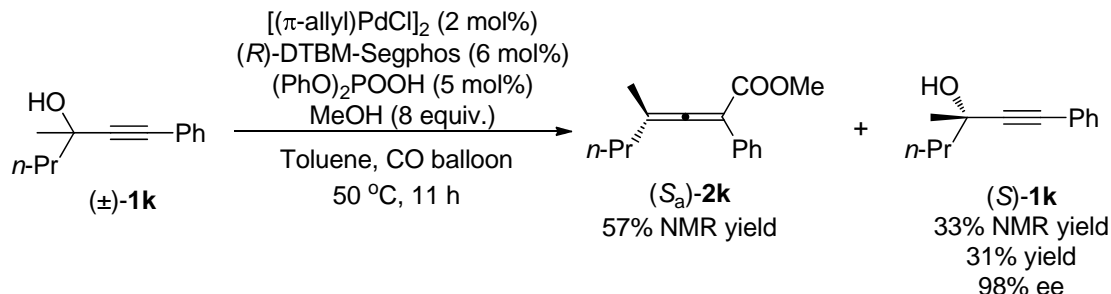

The reaction of  $[(\pi\text{-allyl})\text{PdCl}]_2$  (7.5 mg, 0.02 mmol), (*R*)-DTBM-Segphos (70.9 mg, 0.06 mmol),  $(\text{PhO})_2\text{POOH}$  (12.6 mg, 0.05 mmol), ( $\pm$ )-**1k** (188.4 mg, 1 mmol), MeOH (256.6 mg, 8 mmol), and toluene (5 mL) left (*S*)-**1k** (58.4 mg, 31%) as an oil [eluent: petroleum ether/ethyl ether/dichloromethane = 50/1/1 (0.5 L) to petroleum ether/ethyl ether/dichloromethane = 20/1/1 (0.5 L)]: 98% ee (HPLC conditions: AD-H column, hexane/*i*-PrOH = 95/5, 1.0 mL/min,  $\lambda$  = 214 nm,  $t_R$  (major) = 6.8 min,  $t_R$  (minor) = 7.2 min);  $[\alpha]_D^{23}$  = -0.5 ( $c$  = 1.05,  $\text{CHCl}_3$ );  $^1\text{H}$  NMR (400 MHz,  $\text{CDCl}_3$ ):  $\delta$  = 7.46-7.38 (m, 2 H, Ar-H), 7.35-7.27 (m, 3 H, Ar-H), 2.04 (s, 1 H, OH), 1.80-1.69 (m, 2 H,  $\text{CH}_2$ ), 1.65-1.53 (m, 5 H,  $\text{CH}_3$  and  $\text{CH}_2$ ), 0.99 (t,  $J$  = 7.2 Hz, 3 H,  $\text{CH}_3$  from *n*-Pr);  $^{13}\text{C}$  NMR (100 MHz,  $\text{CDCl}_3$ ):  $\delta$  = 131.6, 128.21, 128.18, 122.8, 92.9, 83.2, 68.6, 46.0, 29.8, 18.1, 14.2; MS (70 eV, EI)  $m/z$  (%): 188 ( $M^+$ , 4.96), 145 (100); IR (neat):  $\nu$  = 3354, 2959, 2933, 2873, 1598, 1489, 1444, 1369, 1286, 1155, 1130, 1018  $\text{cm}^{-1}$ ; HRMS calcd for  $\text{C}_{13}\text{H}_{16}\text{O}$  [ $M^+$ ]: 188.1201, found: 188.1198.

### (13) Preparation of (*S*)-3-methyl-1-phenyloct-1-yn-3-ol ((*S*)-1l) (zwl-10-116)

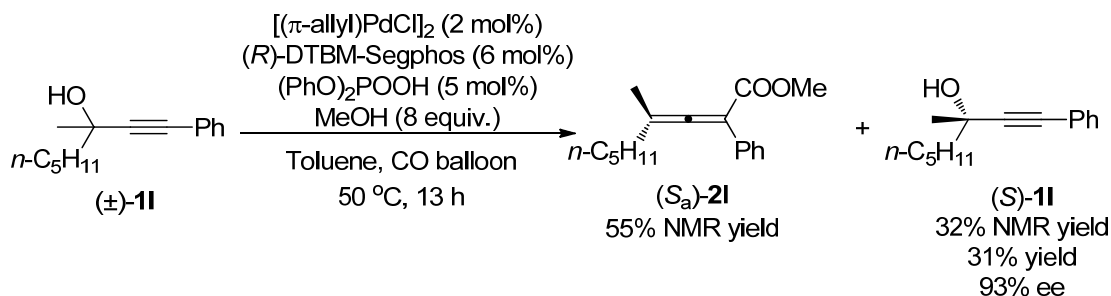

The reaction of  $[(\pi\text{-allyl})\text{PdCl}]_2$  (7.6 mg, 0.02 mmol), (*R*)-DTBM-Segphos (70.9 mg, 0.06 mmol),  $(\text{PhO})_2\text{POOH}$  (12.6 mg, 0.05 mmol), ( $\pm$ )-**1l** (216.3 mg, 1 mmol),

MeOH (256.4 mg, 8 mmol), and toluene (5 mL) left (*S*)-**1l** (67.1 mg, 31%) as an oil [eluent: petroleum ether/ethyl ether/dichloromethane = 50/1/1 (0.5 L) to petroleum ether/ethyl ether/dichloromethane = 20/1/1 (0.5 L)]: 93% ee (HPLC conditions: IC column, hexane/*i*-PrOH = 200/1, 1.0 mL/min,  $\lambda$  = 214 nm,  $t_R$  (minor) = 14.8 min,  $t_R$  (major) = 16.0 min);  $[\alpha]_D^{22}$  = -1.0 ( $c$  = 1.00, CHCl<sub>3</sub>); <sup>1</sup>H NMR (400 MHz, CDCl<sub>3</sub>):  $\delta$  = 7.46-7.38 (m, 2 H, Ar-H), 7.35-7.27 (m, 3 H, Ar-H), 2.11-2.02 (m, 1 H, OH), 1.82-1.67 (m, 2 H, CH<sub>2</sub>), 1.67-1.50 (m, 5 H, CH<sub>3</sub> and CH<sub>2</sub>), 1.42-1.30 (m, 4 H, 2 x CH<sub>2</sub>), 0.91 (t,  $J$  = 7.0 Hz, 3 H, CH<sub>3</sub> from *n*-C<sub>5</sub>H<sub>11</sub>); <sup>13</sup>C NMR (100 MHz, CDCl<sub>3</sub>):  $\delta$  = 131.6, 128.21, 128.18, 122.8, 93.0, 83.2, 68.7, 43.7, 31.9, 29.8, 24.4, 22.6, 14.0; MS (70 eV, EI)  $m/z$  (%): 216 ( $M^+$ , 2.07), 145 (100); IR (neat):  $\nu$  = 3356, 2955, 2932, 2861, 1599, 1489, 1465, 1370, 1129, 1092, 1041 cm<sup>-1</sup>; HRMS calcd for C<sub>15</sub>H<sub>20</sub>O [ $M^+$ ]: 216.1514, found: 216.1512.

**(14) Preparation of (*S*)-6-methyldodec-7-yn-6-ol ((*S*)-**1m**) (zwl-11-25)**

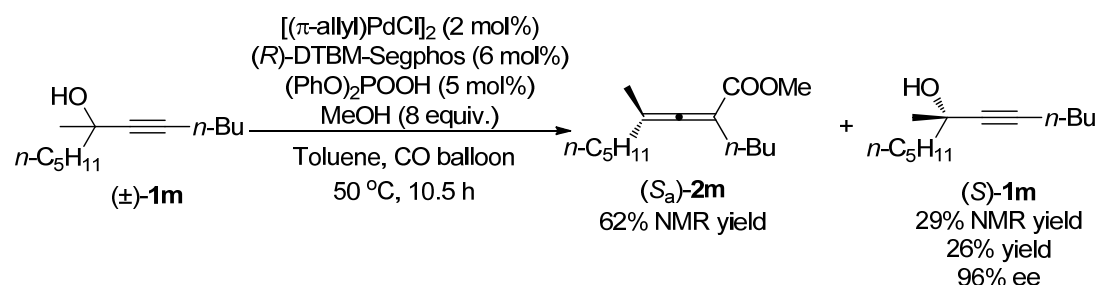

The reaction of  $[(\pi\text{-allyl})\text{PdCl}]_2$  (7.6 mg, 0.02 mmol), (*R*)-DTBM-Segphos (72.4 mg, 0.06 mmol), (PhO)<sub>2</sub>POOH (12.6 mg, 0.05 mmol), ( $\pm$ )-**1m** (196.1 mg, 1 mmol), MeOH (256.1 mg, 8 mmol), and toluene (5 mL) left (*S*)-**1m** (51.0 mg, 26%) as an oil [eluent: petroleum ether/ethyl ether/dichloromethane = 50/1/1 (0.5 L) to petroleum ether/ethyl ether/dichloromethane = 20/1/1 (0.5 L)]: 96% ee (HPLC conditions: AD-H column, hexane/*i*-PrOH = 100/1, 1.0 mL/min,  $\lambda$  = 214 nm,  $t_R$  (major) = 16.4 min,  $t_R$  (minor) = 18.0 min);  $[\alpha]_D^{25}$  = -0.3 ( $c$  = 1.20, CHCl<sub>3</sub>); <sup>1</sup>H NMR (400 MHz, CDCl<sub>3</sub>):  $\delta$  = 2.19 (t,  $J$  = 6.8 Hz, 2 H, CH<sub>2</sub>), 1.93-1.82 (brs, 1 H, OH), 1.72-1.57 (m, 2 H, CH<sub>2</sub>), 1.54-1.21 (m, 13 H, CH<sub>3</sub> and 5 x CH<sub>2</sub>), 1.00-0.83 (m, 6 H, 2 x CH<sub>3</sub>); <sup>13</sup>C NMR (100 MHz, CDCl<sub>3</sub>):  $\delta$  = 84.1, 83.7, 68.3, 43.9, 31.9, 30.8, 30.1, 24.4, 22.6, 21.9, 18.3, 14.0, 13.6; MS (ESI)  $m/z$  (%): 211 ( $M$  - OH+MeOH)<sup>+</sup>; IR (neat):  $\nu$  = 3367, 2957, 2932, 2862, 2238, 1461, 1371, 1329, 1130, 1055 cm<sup>-1</sup>; HRMS calcd for C<sub>13</sub>H<sub>24</sub>O [ $M^+$ ]:

196.1827, found: 196.1830.

**(15) Preparation of (*R*)-2-phenyloct-3-yn-2-ol ((*R*)-1a) (zwl-10-24)**

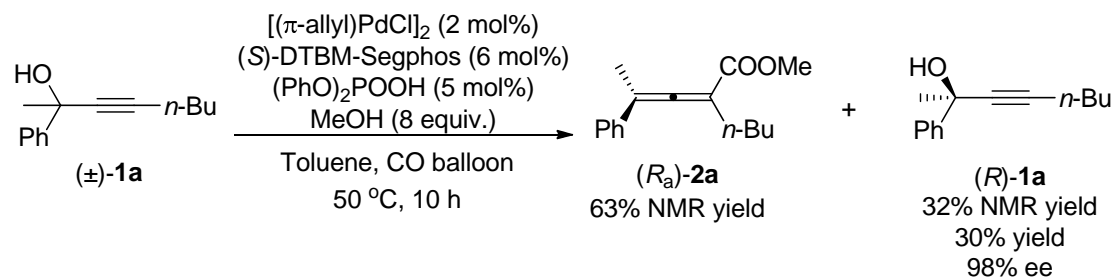

The reaction of  $[(\pi\text{-allyl})\text{PdCl}]_2$  (7.5 mg, 0.02 mmol), (*S*)-DTBM-Segphos (70.9 mg, 0.06 mmol),  $(\text{PhO})_2\text{POOH}$  (12.6 mg, 0.05 mmol), ( $\pm$ )-1a (202.2 mg, 1 mmol), MeOH (256.1 mg, 8.0 mmol), and toluene (5 mL) left (*R*)-1a (60.7 mg, 30%) as an oil [eluent: petroleum ether/ethyl ether/dichloromethane = 50/1/1 (0.5 L) to petroleum ether/ethyl ether/dichloromethane = 20/1/1 (0.5 L)]: 98% ee (HPLC conditions: OD-H column, hexane/*i*-PrOH = 200/1, 1.0 mL/min,  $\lambda$  = 214 nm,  $t_R$  (major) = 17.4 min,  $t_R$  (minor) = 19.3 min);  $[\alpha]_D^{20}$  = +0.4 ( $c$  = 2.18,  $\text{CHCl}_3$ );  $^1\text{H}$  NMR (400 MHz,  $\text{CDCl}_3$ ):  $\delta$  = 7.69-7.61 (m, 2 H, Ar-H), 7.39-7.31 (m, 2 H, Ar-H), 7.31-7.23 (m, 1 H, Ar-H), 2.33 (s, 1 H, OH), 2.28 (t,  $J$  = 7.2 Hz, 2 H,  $\text{CH}_2$ ), 1.74 (s, 3 H,  $\text{CH}_3$ ), 1.59-1.49 (m, 2 H,  $\text{CH}_2$ ), 1.49-1.37 (m, 2 H,  $\text{CH}_2$ ), 0.93 (t,  $J$  = 7.2 Hz, 3 H,  $\text{CH}_3$  from *n*-Bu);  $^{13}\text{C}$  NMR (100 MHz,  $\text{CDCl}_3$ ):  $\delta$  = 146.2, 128.2, 127.5, 124.9, 85.7, 83.7, 70.0, 33.5, 30.7, 22.0, 18.4, 13.6; MS (70 eV, EI)  $m/z$  (%): 202 ( $\text{M}^+$ , 1.33), 187 (100); IR (neat):  $\nu$  = 3386, 2958, 2931, 2862, 2238, 1447, 1365, 1327, 1231, 1179, 1093, 1062, 1027  $\text{cm}^{-1}$ ; Raman :  $\nu$  = 2240  $\text{cm}^{-1}$ ; HRMS calcd for  $\text{C}_{14}\text{H}_{18}\text{O}$  [ $\text{M}^+$ ]: 202.1358, found: 202.1361.

**(16) Preparation of (*S<sub>a</sub>*)-methyl 2-propyl-4-phenyl-2,3-hexadienoate ((*S<sub>a</sub>*)-2n) (zwl-8-173-1) and (*S*)-3-phenyloct-4-yn-3-ol ((*S*)-1n) (zwl-8-173-2)**

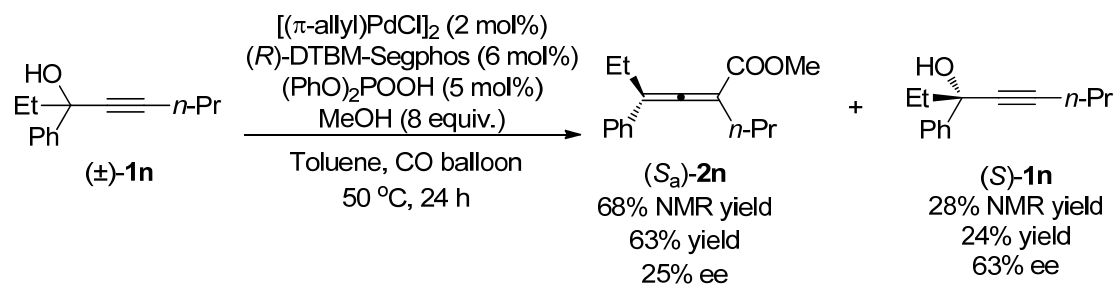

The reaction of  $[(\pi\text{-allyl})\text{PdCl}]_2$  (7.4 mg, 0.02 mmol), (*R*)-DTBM-Segphos (70.9

mg, 0.06 mmol), (PhO)<sub>2</sub>POOH (12.6 mg, 0.05 mmol), (±)-**1n** (202.4 mg, 1 mmol), MeOH (256.1 mg, 8.0 mmol), and toluene (5 mL) afforded (*S<sub>a</sub>*)-**2n** (154.0 mg, 63%) as an oil and left (*S*)-**1n** (48.6 mg, 24%) as an oil [eluent: petroleum ether/ethyl acetate = 100/1 (1.5 L) to petroleum ether/ethyl acetate = 50/1].

(*S<sub>a</sub>*)-**2n**: 25% ee (HPLC conditions: IC column, hexane/*i*-PrOH = 200/1, 1.0 mL/min,  $\lambda$  = 214 nm,  $t_R$  (major) = 6.5 min,  $t_R$  (minor) = 6.8 min); <sup>1</sup>H NMR (400 MHz, CDCl<sub>3</sub>):  $\delta$  = 7.41-7.28 (m, 4 H, Ar-H), 7.28-7.20 (m, 1 H, Ar-H), 3.72 (s, 3 H, OCH<sub>3</sub>), 2.54 (q,  $J$  = 7.2 Hz, 2 H, CH<sub>2</sub>), 2.34 (t,  $J$  = 7.6 Hz, 2 H, CH<sub>2</sub>), 1.57-1.43 (m, 2 H, CH<sub>2</sub>), 1.15 (t,  $J$  = 7.6 Hz, 3 H, CH<sub>3</sub>), 0.94 (t,  $J$  = 7.4 Hz, 3 H, CH<sub>3</sub>); <sup>13</sup>C NMR (100 MHz, CDCl<sub>3</sub>):  $\delta$  = 210.9, 168.0, 135.2, 128.5, 127.3, 126.2, 111.5, 103.8, 52.0, 31.1, 23.1, 21.5, 13.9, 12.3; MS (70 eV, EI)  $m/z$  (%): 245 ( $M^+$ +1, 10.43), 244 ( $M^+$ , 55.55), 229 (100); IR (neat):  $\nu$  = 2958, 2919, 2873, 1936, 1703, 1493, 1453, 1435, 1377, 1269, 1230, 1216, 1135, 1088, 1067, 1032 cm<sup>-1</sup>; HRMS calcd for C<sub>16</sub>H<sub>20</sub>O<sub>2</sub> [ $M^+$ ]: 244.1463, found: 244.1466.

(*S*)-**1n**: 63% ee (HPLC conditions: Regis (*R,R*) Whelk-O column, hexane/*i*-PrOH = 200/1, 1.0 mL/min,  $\lambda$  = 214 nm,  $t_R$  (minor) = 6.2 min,  $t_R$  (major) = 7.5 min); <sup>1</sup>H NMR (400 MHz, CDCl<sub>3</sub>):  $\delta$  = 7.66-7.57 (m, 2 H, Ar-H), 7.38-7.30 (m, 2 H, Ar-H), 7.30-7.22 (m, 1 H, Ar-H), 2.41-2.32 (m, 1 H, OH), 2.27 (t,  $J$  = 7.0 Hz, 2 H, CH<sub>2</sub>), 2.02-1.80 (m, 2 H, CH<sub>2</sub>), 1.64-1.52 (m, 2 H, CH<sub>2</sub>), 1.02 (t,  $J$  = 7.4 Hz, 3 H, CH<sub>3</sub>), 0.94 (t,  $J$  = 7.2 Hz, 3 H, CH<sub>3</sub>); <sup>13</sup>C NMR (100 MHz, CDCl<sub>3</sub>):  $\delta$  = 145.1, 127.9, 127.4, 125.5, 86.6, 82.6, 73.9, 38.5, 22.1, 20.7, 13.5, 9.1; MS (ESI)  $m/z$  (%): 185 ( $M$ -OH)<sup>+</sup>; IR (neat):  $\nu$  = 3418, 2965, 2934, 2874, 2242, 1448, 1378, 1328, 1209, 1166, 1051, 1017 cm<sup>-1</sup>; HRMS calcd for C<sub>14</sub>H<sub>18</sub>O [ $M^+$ ]: 202.1358, found: 202.1361.

**(17) Preparation of (*S<sub>a</sub>*)-ethyl 2-butyl-4-phenyl-2,3-pentadienoate ((*S<sub>a</sub>*)-**2aa**) (zwl-11-18-1) and (*S*)-2-phenyloct-3-yn-2-ol ((*S*)-**1a**) (zwl-11-18-2)**

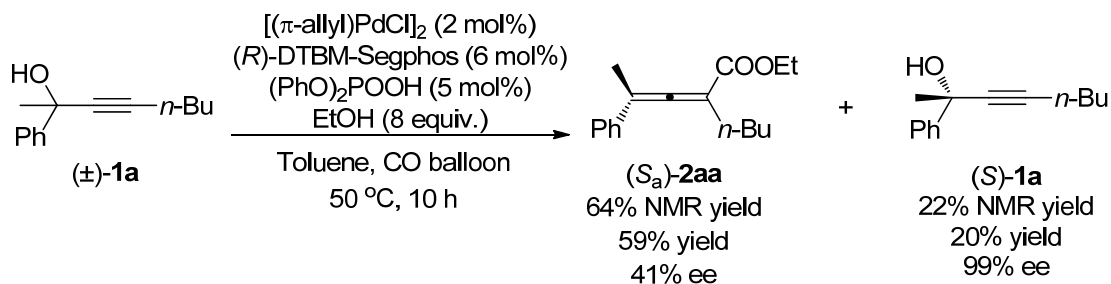

The reaction of [( $\pi$ -allyl)PdCl]<sub>2</sub> (3.5 mg, 0.01 mmol), (*R*)-DTBM-Segphos (36.2 mg, 0.06 mmol), (PhO)<sub>2</sub>POOH (6.4 mg, 0.05 mmol), (±)-**1a** (101.1 mg, 0.5 mmol), EtOH (184.1 mg, 4 mmol), and toluene (2.5 mL) afforded (S<sub>a</sub>)-**2aa** (75.7 mg, 59%) as an oil and left (S)-**1a** (20.1 mg, 20%) as an oil [eluent: petroleum ether/ethyl ether/dichloromethane = 50/1/1 (0.5 L) to petroleum ether/ethyl ether/dichloromethane = 20/1/1 (0.5 L)].

(S<sub>a</sub>)-**2aa**: 41% ee (HPLC conditions: Regis (*R,R*) Whelk-O column, hexane/*i*-PrOH = 200/1, 1.0 mL/min,  $\lambda$  = 214 nm,  $t_R$  (minor) = 7.8 min,  $t_R$  (major) = 9.0 min;  $[\alpha]_D^{26}$  = +28.2 ( $c$  = 1.17, CHCl<sub>3</sub>); <sup>1</sup>H NMR (400 MHz, CDCl<sub>3</sub>):  $\delta$  = 7.44-7.28 (m, 4 H, Ar-H), 7.28-7.18 (m, 1 H, Ar-H), 4.19 (q,  $J$  = 7.2 Hz, 2 H, OCH<sub>2</sub>), 2.34 (t,  $J$  = 7.4 Hz, 2 H, CH<sub>3</sub>), 2.17 (s, 3 H, CH<sub>3</sub>), 1.51-1.40 (m, 2 H, CH<sub>2</sub>), 1.40-1.29 (m, 2 H, CH<sub>2</sub>), 1.25 (t,  $J$  = 7.2 Hz, 3 H, CH<sub>3</sub>), 0.88 (t,  $J$  = 7.4 Hz, 3 H, CH<sub>3</sub>); <sup>13</sup>C NMR (100 MHz, CDCl<sub>3</sub>):  $\delta$  = 211.1, 167.4, 135.7, 128.4, 127.2, 126.0, 104.5, 102.3, 60.8, 30.2, 28.7, 22.3, 16.4, 14.3, 13.9; MS (70 eV, EI)  $m/z$  (%): 258 (M<sup>+</sup>, 2.07), 143 (100); IR (neat):  $\nu$  = 2956, 2928, 2859, 1943, 1707, 1598, 1494, 1462, 1444, 1368, 1257, 1118, 1086, 1067, 1025 cm<sup>-1</sup>; HRMS calcd for C<sub>17</sub>H<sub>22</sub>O<sub>2</sub> [M<sup>+</sup>]: 258.1620, found: 258.1623.

(S)-**1a**: 99% ee (HPLC conditions: Regis (*S,S*) Whelk-O column, hexane/*i*-PrOH = 200/1, 1.0 mL/min,  $\lambda$  = 214 nm,  $t_R$  (major) = 13.7 min,  $t_R$  (minor) = 17.7 min); <sup>1</sup>H NMR (400 MHz, CDCl<sub>3</sub>):  $\delta$  = 7.69-7.62 (m, 2 H, Ar-H), 7.40-7.32 (m, 2 H, Ar-H), 7.32-7.24 (m, 1 H, Ar-H), 2.33-2.24 (m, 3 H, OH and CH<sub>2</sub>), 1.74 (s, 3 H, CH<sub>3</sub>), 1.61-1.49 (m, 2 H, CH<sub>2</sub>), 1.49-1.37 (m, 2 H, CH<sub>2</sub>), 0.93 (t,  $J$  = 7.4 Hz, 3 H, CH<sub>3</sub> from *n*-Bu). For full characterization, see experiment No. 1. (1) at Page S9.

**(18) Preparation of (S<sub>a</sub>)-isopropyl 2-butyl-4-phenyl-2,3-pentadienoate ((S<sub>a</sub>)-**2ab**) (zwl-11-19-1) and (S)-2-phenyloct-3-yn-2-ol ((S)-**1a**) (zwl-11-19-2)**

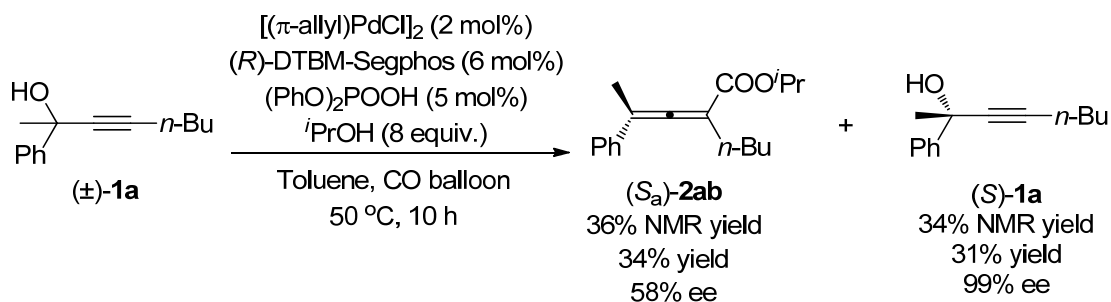

The reaction of [( $\pi$ -allyl)PdCl]<sub>2</sub> (3.6 mg, 0.01 mmol), (R)-DTBM-Segphos (36.2 mg, 0.06 mmol), (PhO)<sub>2</sub>POOH (6.4 mg, 0.05 mmol), (±)-**1a** (101.2 mg, 0.5 mmol), *i*PrOH (240.1 mg, 4 mmol), and toluene (2.5 mL) afforded (S<sub>a</sub>)-**2ab** (46.3 mg, 34%) as an oil and left (S)-**1a** (31.4 mg, 31%) as an oil [eluent: petroleum ether/ethyl ether/dichloromethane = 50/1/1 (0.5 L) to petroleum ether/ethyl ether/dichloromethane = 20/1/1 (0.5 L)].

(S<sub>a</sub>)-**2ab**: 58% ee (HPLC conditions: Regis (*R,R*) Whelk-O column, hexane/*i*-PrOH = 200/1, 1.0 mL/min,  $\lambda$  = 214 nm,  $t_R$  (minor) = 7.3 min,  $t_R$  (major) = 8.6 min;  $[\alpha]_D^{26}$  = +51.2 ( $c$  = 1.20, CHCl<sub>3</sub>); <sup>1</sup>H NMR (400 MHz, CDCl<sub>3</sub>):  $\delta$  = 7.43-7.29 (m, 4 H, Ar-H), 7.28-7.20 (m, 1 H, Ar-H), 5.13-4.99 (m, 1 H, OCH), 2.33 (t,  $J$  = 7.4 Hz, 2 H, CH<sub>2</sub>), 2.17 (s, 3 H, CH<sub>3</sub>), 1.50-1.38 (m, 2 H, CH<sub>2</sub>), 1.38-1.28 (m, 2 H, CH<sub>2</sub>), 1.28-1.17 (m, 6 H, 2 x CH<sub>3</sub>), 0.88 (t,  $J$  = 7.4 Hz, 3 H, CH<sub>3</sub>); <sup>13</sup>C NMR (100 MHz, CDCl<sub>3</sub>):  $\delta$  = 211.1, 166.9, 135.9, 128.4, 127.2, 126.0, 104.4, 102.7, 68.1, 30.2, 28.6, 22.3, 21.9, 21.8, 16.4, 13.9; MS (70 eV, EI)  $m/z$  (%): 272 (M<sup>+</sup>, 1.62), 143 (100); IR (neat):  $\nu$  = 2957, 2928, 2860, 1944, 1704, 1494, 1463, 1373, 1260, 1105, 1066 cm<sup>-1</sup>; HRMS calcd for C<sub>18</sub>H<sub>24</sub>O<sub>2</sub> [M<sup>+</sup>]: 272.1776, found: 272.1773.

(S)-**1a**: 99% ee (HPLC conditions: Regis (*S,S*) Whelk-O column, hexane/*i*-PrOH = 200/1, 1.0 mL/min,  $\lambda$  = 214 nm,  $t_R$  (major) = 13.8 min,  $t_R$  (minor) = 18.4 min); <sup>1</sup>H NMR (400 MHz, CDCl<sub>3</sub>):  $\delta$  = 7.72-7.61 (m, 2 H, Ar-H), 7.42-7.32 (m, 2 H, Ar-H), 7.32-7.23 (m, 1 H, Ar-H), 2.35-2.20 (m, 3 H, OH and CH<sub>2</sub>), 1.74 (s, 3 H, CH<sub>3</sub>), 1.60-1.49 (m, 2 H, CH<sub>2</sub>), 1.49-1.38 (m, 2 H, CH<sub>2</sub>), 0.93 (t,  $J$  = 7.4 Hz, 3 H, CH<sub>3</sub> from *n*-Bu). For full characterization, see experiment No. 1. (1) at Page S9.

## Synthesis of optically active 2,3-allenoates

### (1) Preparation of (*R<sub>a</sub>*)-methyl 4-phenyl-2-butyl-2,3-pentadienoate ((*R<sub>a</sub>*)-2a) (zwl-11-65)

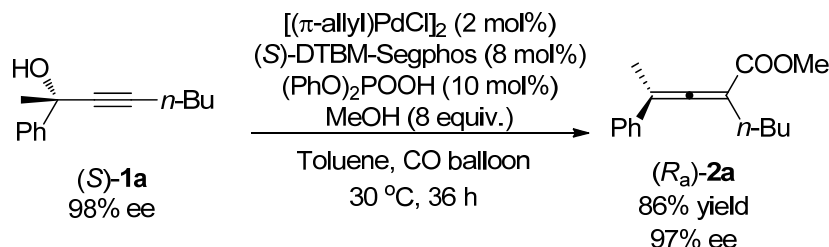

Following **Typical Procedure I**, the reaction of  $[(\pi\text{-allyl})\text{PdCl}]_2$  (3.6 mg, 0.01 mmol), (*S*)-DTBM-Segphos (48.3 mg, 0.04 mmol),  $(\text{PhO})_2\text{POOH}$  (12.4 mg, 0.05 mmol), (*S*)-**1a** (101.2 mg, 0.5 mmol, 98% ee), MeOH (128.4 mg, 4 mmol), and toluene (5 mL) afforded (*R<sub>a</sub>*)-**2a** (105.1 mg, 86%) as an oil [eluent: petroleum ether/ethyl ether/dichloromethane = 50/1/1]: 97% ee (HPLC conditions: Regis (*S,S*) Whelk-O column, hexane/*i*-PrOH = 200/1, 1.0 mL/min,  $\lambda$  = 214 nm,  $t_R$  (minor) = 7.3 min,  $t_R$  (major) = 8.6 min);  $[\alpha]_D^{20}$  = -35.8 ( $c$  = 1.25,  $\text{CHCl}_3$ );  $^1\text{H}$  NMR (400 MHz,  $\text{CDCl}_3$ ):  $\delta$  = 7.44-7.29 (m, 4 H, Ar-H), 7.29-7.20 (m, 1 H, Ar-H), 3.72 (s, 3 H,  $\text{OCH}_3$ ), 2.35 (t,  $J$  = 7.6 Hz, 2 H,  $\text{CH}_2$ ), 2.18 (s, 3 H,  $\text{CH}_3$ ), 1.52-1.41 (m, 2 H,  $\text{CH}_2$ ), 1.41-1.30 (m, 2 H,  $\text{CH}_2$ ), 0.88 (t,  $J$  = 7.4 Hz, 3 H,  $\text{CH}_3$  from *n*-Bu);  $^{13}\text{C}$  NMR (100 MHz,  $\text{CDCl}_3$ ):  $\delta$  = 211.1, 167.8, 135.4, 128.5, 127.3, 125.9, 104.6, 102.0, 52.0, 30.2, 28.7, 22.3, 16.4, 13.8; MS (70 eV, EI)  $m/z$  (%): 244 ( $\text{M}^+$ , 2.19), 143 (100); IR (neat):  $\nu$  = 2954, 2927, 2861, 1943, 1712, 1436, 1260, 1124, 1067  $\text{cm}^{-1}$ ; HRMS calcd for  $\text{C}_{16}\text{H}_{20}\text{O}_2$  [ $\text{M}^+$ ]: 244.1463, found: 244.1460.

### (2) Preparation of (*R<sub>a</sub>*)-methyl 2-(4-chlorobutyl)-4-phenyl-2,3-pentadienoate ((*R<sub>a</sub>*)-2c) (zwl-11-71)

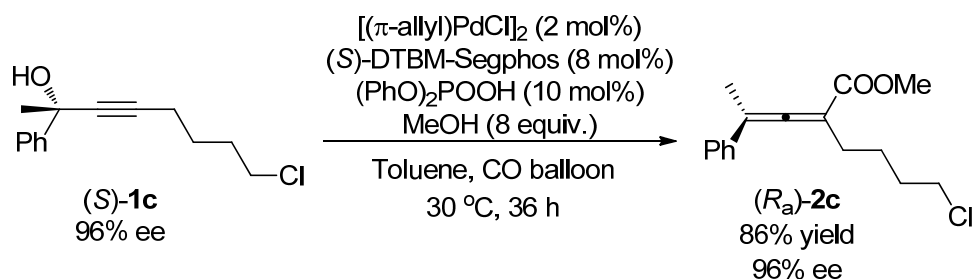

Following **Typical Procedure I**, the reaction of  $[(\pi\text{-allyl})\text{PdCl}]_2$  (3.6 mg, 0.01

mmol), (*S*)-DTBM-Segphos (48.2 mg, 0.04 mmol), (PhO)<sub>2</sub>POOH (12.4 mg, 0.05 mmol), (*S*)-**1c** (118.2 mg, 0.5 mmol, 96% ee), MeOH (128.6 mg, 4 mmol), and toluene (5 mL) afforded (*R<sub>a</sub>*)-**2c** (119.7 mg, 86%) as an oil [eluent: petroleum ether/ethyl ether/dichloromethane = 100/1/1]: 96% ee (HPLC conditions: Regis (*S,S*) Whelk-O column, hexane/*i*-PrOH = 100/1, 1.0 mL/min,  $\lambda$  = 214 nm,  $t_R$  (minor) = 9.4 min,  $t_R$  (major) = 10.6 min);  $[\alpha]_D^{21}$  = -4.5 ( $c$  = 1.35, CHCl<sub>3</sub>); <sup>1</sup>H NMR (400 MHz, CDCl<sub>3</sub>):  $\delta$  = 7.43-7.30 (m, 4 H, Ar-H), 7.30-7.21 (m, 1 H, Ar-H), 3.73 (s, 3 H, OCH<sub>3</sub>), 3.50 (t,  $J$  = 6.6 Hz, 2 H, CH<sub>2</sub>), 2.39 (t,  $J$  = 7.4 Hz, 2 H, CH<sub>2</sub>), 2.19 (s, 3 H, CH<sub>3</sub>), 1.87-1.75 (m, 2 H, CH<sub>2</sub>), 1.70-1.56 (m, 2 H, CH<sub>2</sub>); <sup>13</sup>C NMR (100 MHz, CDCl<sub>3</sub>):  $\delta$  = 213.7, 166.5, 134.5, 132.9, 128.7, 128.30, 128.28, 127.8, 127.7, 126.1, 106.0, 104.3, 52.3, 16.3; MS (70 eV, EI)  $m/z$  (%): 280 ( $M^+$ (<sup>37</sup>Cl), 1.75), 278 ( $M^+$ (<sup>35</sup>Cl), 5.10), 143 (100); IR (neat):  $\nu$  = 2950, 2864, 1942, 1710, 1493, 1436, 1251, 1099 cm<sup>-1</sup>; HRMS calcd for C<sub>16</sub>H<sub>19</sub>O<sub>2</sub><sup>35</sup>Cl [ $M^+$ ]: 278.1074, found: 278.1078.

**(3) Preparation of (*R<sub>a</sub>*)-methyl 2-(*n*-hexyl)-4-(4-bromophenyl)-2,3-pentadienoate ((*R<sub>a</sub>*)-**2e**) (zwl-11-73)**

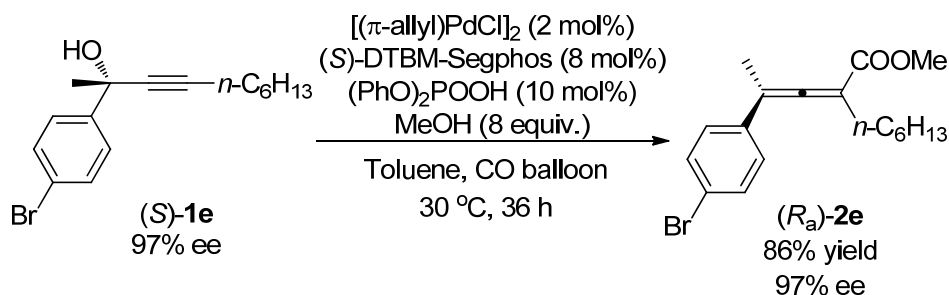

Following **Typical Procedure I**, the reaction of [( $\pi$ -allyl)PdCl]<sub>2</sub> (3.6 mg, 0.01 mmol), (*S*)-DTBM-Segphos (48.2 mg, 0.04 mmol), (PhO)<sub>2</sub>POOH (12.6 mg, 0.05 mmol), (*S*)-**1e** (154.4 mg, 0.5 mmol, 97% ee), MeOH (128.1 mg, 4 mmol), and toluene (5 mL) afforded (*R<sub>a</sub>*)-**2e** (138.8 mg, 86%) as an oil [eluent: petroleum ether/ethyl ether/dichloromethane = 100/1/1]: 97% ee (HPLC conditions: Regis (*S,S*) Whelk-O column, hexane/*i*-PrOH = 200/1, 1.0 mL/min,  $\lambda$  = 214 nm,  $t_R$  (minor) = 7.9 min,  $t_R$  (major) = 8.7 min);  $[\alpha]_D^{21}$  = -18.0 ( $c$  = 1.89, CHCl<sub>3</sub>); <sup>1</sup>H NMR (400 MHz, CDCl<sub>3</sub>):  $\delta$  = 7.45 (dt,  $J_1$  = 8.9 Hz,  $J_2$  = 2.2 Hz, 2 H, Ar-H), 7.23 (dt,  $J_1$  = 8.8 Hz,  $J_2$  = 2.3 Hz, 2 H, Ar-H), 3.73 (s, 3 H, OCH<sub>3</sub>), 2.34 (t,  $J$  = 7.4 Hz, 2 H, CH<sub>2</sub>), 2.15 (s, 3 H,

CH<sub>3</sub>), 1.50-1.38 (m, 2 H, CH<sub>2</sub>), 1.37-1.18 (m, 6 H, 3 x CH<sub>2</sub>), 0.85 (t, *J* = 6.8 Hz, 3 H, CH<sub>3</sub> from *n*-C<sub>6</sub>H<sub>13</sub>); <sup>13</sup>C NMR (100 MHz, CDCl<sub>3</sub>): δ = 211.0, 167.5, 134.5, 131.5, 127.5, 121.3, 103.9, 102.4, 52.1, 31.6, 28.9, 28.8, 27.9, 22.6, 16.3, 14.0; MS (70 eV, EI) *m/z* (%): 352 (M<sup>+</sup>(<sup>81</sup>Br), 1.27), 350 (M<sup>+</sup>(<sup>79</sup>Br), 1.19), 142 (100); IR (neat): ν = 1935, 1703, 1461, 1435, 1249, 1219, 1079, 1006 cm<sup>-1</sup>; HRMS calcd for C<sub>18</sub>H<sub>23</sub>O<sub>2</sub><sup>79</sup>Br [M<sup>+</sup>]: 350.0881, found: 350.0880.

**(4) Preparation of (*R*<sub>a</sub>)-methyl 2,4-diphenyl-2,3-pentadienoate ((*R*<sub>a</sub>)-2j) (zwl-11-69)**

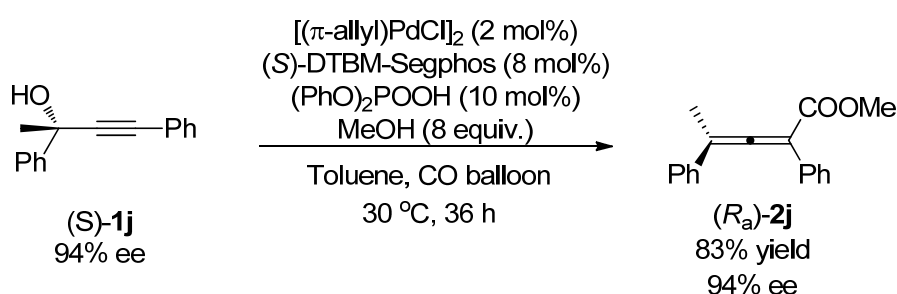

Following **Typical Procedure I**, the reaction of [( $\pi$ -allyl)PdCl]<sub>2</sub> (3.6 mg, 0.01 mmol), (*S*)-DTBM-Segphos (48.2 mg, 0.04 mmol), (PhO)<sub>2</sub>POOH (12.6 mg, 0.05 mmol), (*S*)-1j (111.0 mg, 0.5 mmol, 94% ee), MeOH (128.3 mg, 4 mmol), and toluene (5 mL) afforded (*R*<sub>a</sub>)-2j (109.6 mg, 83%) as an oil [eluent: petroleum ether/ethyl ether/dichloromethane = 100/1/1]: 94% ee (HPLC conditions: PC-2 column, hexane/*i*-PrOH = 100/1, 1.0 mL/min, λ = 214 nm, *t*<sub>R</sub> (minor) = 7.6 min, *t*<sub>R</sub> (major) = 8.8 min); [α]<sub>D</sub><sup>20</sup> = +219.1 (*c* = 1.47, CHCl<sub>3</sub>); <sup>1</sup>H NMR (400 MHz, CDCl<sub>3</sub>): δ = 7.61-7.50 (m, 2 H, Ar-H), 7.50-7.40 (m, 2 H, Ar-H), 7.40-7.21 (m, 6 H, Ar-H), 3.80 (s, 3 H, OCH<sub>3</sub>), 2.28 (s, 3 H, CH<sub>3</sub>); <sup>13</sup>C NMR (100 MHz, CDCl<sub>3</sub>): δ = 213.6, 166.5, 134.5, 132.9, 128.7, 128.29, 128.27, 127.8, 127.6, 126.1, 106.0, 104.3, 52.3, 16.2; MS (70 eV, EI) *m/z* (%): 265 (M<sup>+</sup>+1, 16.85), 264 (M<sup>+</sup>, 75.94), 205 (100); IR (neat): ν = 3026, 2950, 1931, 1715, 1491, 1436, 1270, 1241, 1194, 1169, 1019 cm<sup>-1</sup>; HRMS calcd for C<sub>18</sub>H<sub>16</sub>O<sub>2</sub> [M<sup>+</sup>]: 264.1150, found: 264.1152.

**(5) Preparation of (*R*<sub>a</sub>)-methyl 2-phenyl-4-methyl-2,3-nonadienoate ((*R*<sub>a</sub>)-2l) (zwl-11-70)**

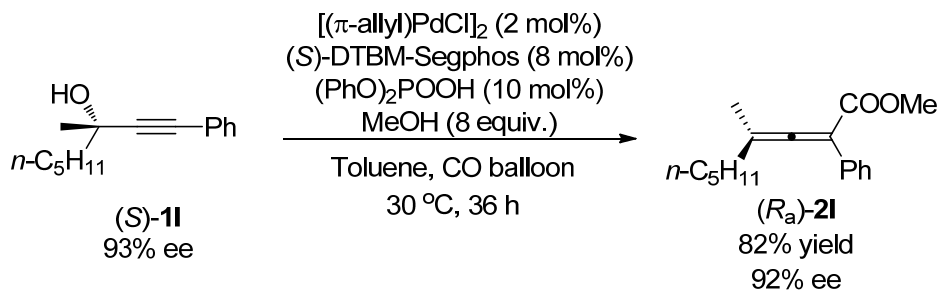

Following **Typical Procedure I**, the reaction of  $[(\pi\text{-allyl})\text{PdCl}]_2$  (3.6 mg, 0.01 mmol),  $(S)\text{-DTBM-Segphos}$  (48.3 mg, 0.04 mmol),  $(\text{PhO})_2\text{POOH}$  (12.4 mg, 0.05 mmol),  $(S)\text{-11}$  (108.0 mg, 0.5 mmol, 93% ee),  $\text{MeOH}$  (128.1 mg, 4 mmol), and toluene (5 mL) afforded  $(R_a)\text{-21}$  (105.7 mg, 82%) as an oil [eluent: petroleum ether/ethyl ether/dichloromethane = 100/1/1]: 92% ee (HPLC conditions: Regis ( $S,S$ ) Whelk-O column, hexane/ $i$ -PrOH = 200/1, 1.0 mL/min,  $\lambda$  = 214 nm,  $t_R$  (minor) = 11.3 min,  $t_R$  (major) = 12.3 min);  $[\alpha]_D^{20}$  = +64.7 ( $c$  = 1.80,  $\text{CHCl}_3$ );  $^1\text{H}$  NMR (400 MHz,  $\text{CDCl}_3$ ):  $\delta$  = 7.52-7.41 (m, 2 H, Ar-H), 7.37-7.27 (m, 2 H, Ar-H), 7.27-7.19 (m, 1 H, Ar-H), 3.78 (s, 3 H,  $\text{OCH}_3$ ), 2.23-2.07 (m, 2 H,  $\text{CH}_2$ ), 1.87 (s, 3 H,  $\text{CH}_3$ ), 1.58-1.44 (m, 2 H,  $\text{CH}_2$ ), 1.38-1.20 (m, 4 H, 2 x  $\text{CH}_2$ ), 0.85 (t,  $J$  = 6.8 Hz, 3 H,  $\text{CH}_3$  from  $n\text{-Bu}$ );  $^{13}\text{C}$  NMR (100 MHz,  $\text{CDCl}_3$ ):  $\delta$  = 209.4, 167.4, 134.0, 128.3, 128.1, 127.1, 105.1, 101.8, 52.0, 33.6, 31.3, 26.8, 22.4, 18.0, 14.0; MS (70 eV, EI)  $m/z$  (%): 259 ( $\text{M}^+ + 1$ , 2.68), 258 ( $\text{M}^+$ , 14.64), 143 (100); IR (neat):  $\nu$  = 2926, 2858, 1948, 1715, 1435, 1272, 1196, 1175, 1021  $\text{cm}^{-1}$ ; HRMS calcd for  $\text{C}_{17}\text{H}_{22}\text{O}_2$  [ $\text{M}^+$ ]: 258.1620, found: 258.1624.

## 2. Mechanistic studies

### (1) Subjecting optically active allenolate to the standard reaction conditions

(zwl-11-22)

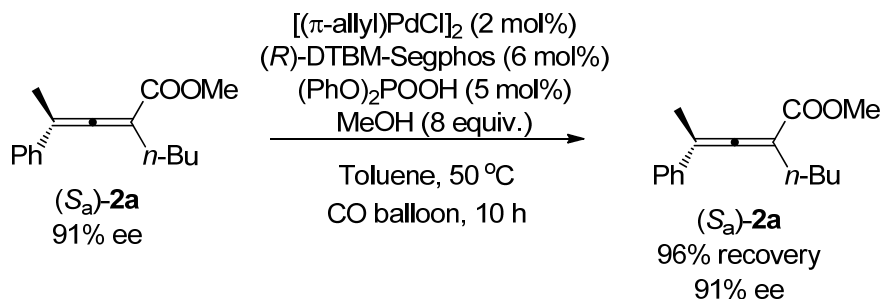

To a flame-dried Schlenk tube were added [( $\pi$ -allyl)PdCl]<sub>2</sub> (3.6 mg, 0.01 mmol), (R)-DTBM-Segphos (36.0 mg, 0.03 mmol), (PhO)<sub>2</sub>POOH (6.4 mg, 0.025 mmol), (S<sub>a</sub>)-**2a** (122.0 mg, 0.5 mmol, 91% ee), MeOH (128.0 mg, 4 mmol), and toluene (2.5 mL) sequentially under argon. The resulting mixture was then frozen with a liquid nitrogen bath, degassed to remove the argon inside completely, and refilled with CO by a balloon of CO for three times. Then the liquid nitrogen bath was removed and the resulting mixture was warmed up to room temperature and vigorously stirred at 50 °C with a balloon of CO for 10 h. The reaction mixture was then diluted with ethyl acetate (5 mL), filtered through a short column silica gel (3.5 cm), eluted with ethyl acetate (20 mL), and concentrated. The residue was purified by column chromatography on silica gel to afford (S<sub>a</sub>)-**2a** (117.0 mg, 96%) as an oil [eluent: petroleum ether/ethyl ether/dichloromethane = 100/1/1 (0.5 L)]: 91% ee (HPLC conditions: Regis (S,S) Whelk-O column, hexane/*i*-PrOH = 200/1, 1.0 mL/min,  $\lambda$  = 214 nm,  $t_R$  (major) = 12.1 min,  $t_R$  (minor) = 14.4 min); <sup>1</sup>H NMR (400 MHz, CDCl<sub>3</sub>):  $\delta$  = 7.44-7.31 (m, 4 H, Ar-H), 7.30-7.22 (m, 1 H, Ar-H), 3.73 (s, 3 H, OCH<sub>3</sub>), 2.35 (t,  $J$  = 7.4 Hz, 2 H, CH<sub>2</sub>), 2.18 (s, 3 H, CH<sub>3</sub>), 1.51-1.41 (m, 2 H, CH<sub>2</sub>), 1.41-1.29 (m, 2 H, CH<sub>2</sub>), 0.88 (t,  $J$  = 7.4 Hz, 3 H, CH<sub>3</sub> from *n*-Bu). For full characterization, see experiment No. 1. (1) at Page S8.

**(2) Subjecting optically active allenolate to the reaction conditions applying (S)-DTBM-Segphos (zwi-11-67)**

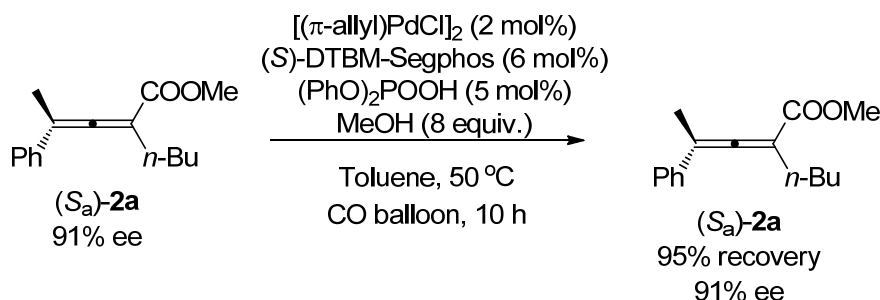

To a flame-dried Schlenk tube were added  $[(\pi\text{-allyl})\text{PdCl}]_2$  (3.6 mg, 0.01 mmol), (S)-DTBM-Segphos (36.0 mg, 0.03 mmol),  $(\text{PhO})_2\text{POOH}$  (6.3 mg, 0.025 mmol), **(S<sub>a</sub>)-2a** (122.0 mg, 0.5 mmol, 91% ee), MeOH (128.4 mg, 4 mmol), and toluene (2.5 mL) sequentially under argon. The resulting mixture was then frozen with a liquid nitrogen bath, degassed to remove the argon inside completely, and refilled with CO by a balloon of CO for three times. Then the liquid nitrogen bath was removed and the mixture was warmed up to room temperature and vigorously stirred at 50 °C with a balloon of CO for 10 h. The reaction mixture was then diluted with ethyl acetate (5 mL), filtered through a short column silica gel (3.5 cm), eluted with ethyl acetate (20 mL), and concentrated. The residue was purified by column chromatography on silica gel to afford **(S<sub>a</sub>)-2a** (115.9 mg, 95%) as an oil [eluent: petroleum ether/ethyl ether/dichloromethane = 50/1/1 (0.5 L)]: 91% ee (HPLC conditions: Regis (S,S) Whelk-O column, hexane/*i*-PrOH = 200/1, 1.0 mL/min,  $\lambda$  = 214 nm,  $t_R$  (major) = 7.6 min,  $t_R$  (minor) = 8.8 min);  $[\alpha]^{24}_D = +31.6$  ( $c$  = 1.10,  $\text{CHCl}_3$ );  $^1\text{H}$  NMR (400 MHz,  $\text{CDCl}_3$ ):  $\delta$  = 7.43–7.29 (m, 4 H, Ar-H), 7.28–7.20 (m, 1 H, Ar-H), 3.72 (s, 3 H,  $\text{OCH}_3$ ), 2.35 (t,  $J$  = 7.6 Hz, 2 H,  $\text{CH}_2$ ), 2.18 (s, 3 H,  $\text{CH}_3$ ), 1.52–1.41 (m, 2 H,  $\text{CH}_2$ ), 1.41–1.29 (m, 2 H,  $\text{CH}_2$ ), 0.88 (t,  $J$  = 7.4 Hz, 3 H,  $\text{CH}_3$  from *n*-Bu). For full characterization, see experiment No. 1. (1) at Page S8.

**(3) Subjecting optically active propargylic alcohol to the standard conditions  
(zwl-11-42)**

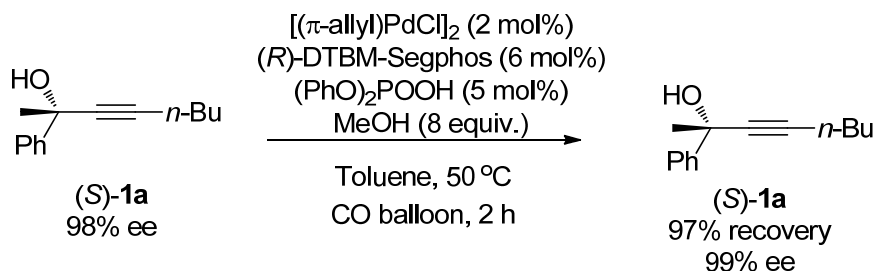

To a flame-dried Schlenk tube were added  $[(\pi\text{-allyl})\text{PdCl}]_2$  (0.7 mg, 0.002 mmol), (*R*)-DTBM-Segphos (7.3 mg, 0.006 mmol),  $(\text{PhO})_2\text{POOH}$  (1.2 mg, 0.005 mmol), (S)-**1a** (20.2 mg, 0.1 mmol, 98% ee), MeOH (25.7 mg, 0.8 mmol), and toluene (1 mL) sequentially under argon. The resulting mixture was then frozen with a liquid nitrogen bath, degassed to remove the argon inside completely, and refilled with CO by a balloon of CO for three times. Then the liquid nitrogen bath was removed and the resulting mixture was warmed up to room temperature and vigorously stirred at 50 °C with a balloon of CO for 2 h. The resulting mixture was then filtered through a short column of silica gel (3.5 cm), eluted with ethyl acetate (20 mL), and concentrated. The residue was purified by column chromatography on silica gel to afford (S)-**1a** (19.5 mg, 97%) as an oil [eluent: petroleum ether/ethyl ether/dichloromethane = 20/1/1 (0.5 L)]: 99% ee (HPLC conditions: OD-H column, hexane/*i*-PrOH = 200/1, 1.0 mL/min,  $\lambda$  = 214 nm,  $t_R$  (minor) = 22.6 min,  $t_R$  (major) = 25.3 min);  $^1\text{H}$  NMR (400 MHz,  $\text{CDCl}_3$ ):  $\delta$  = 7.72-7.62 (m, 2 H, Ar-H), 7.42-7.32 (m, 2 H, Ar-H), 7.32-7.23 (m, 1 H, Ar-H), 2.35-2.23 (m, 3 H, OH and  $\text{CH}_2$ ), 1.74 (s, 3 H,  $\text{CH}_3$ ), 1.60-1.49 (m, 2 H,  $\text{CH}_2$ ), 1.49-1.38 (m, 2 H,  $\text{CH}_2$ ), 0.93 (t,  $J$  = 7.4 Hz, 3 H,  $\text{CH}_3$  from *n*-Bu). For full characterization, see experiment No. 1. (1) on page S9.

#### (4) Kinetic experiments (zwl-11-33)

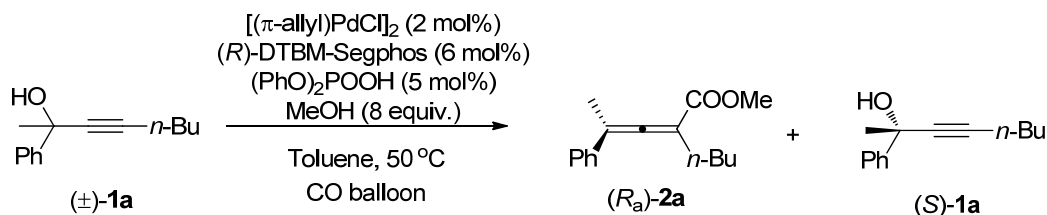

To a flame-dried Schlenk tube were added  $[(\pi\text{-allyl})\text{PdCl}]_2$  (7.4 mg, 0.02 mmol),  $(R)$ -DTBM-Segphos (72.3 mg, 0.06 mmol),  $(\text{PhO})_2\text{POOH}$  (12.6 mg, 0.05 mmol),  $(\pm)$ -**1a** (202.1 mg, 1 mmol), MeOH (256.1 mg, 8 mmol), and toluene (5 mL) sequentially under argon. The resulting mixture was then frozen with a liquid nitrogen bath, degassed to remove the argon inside completely, and refilled with CO by a balloon of CO for three times. Then the liquid nitrogen bath was removed and the mixture was warmed up to room temperature. Then the resulting mixture was stirred at 50 °C with a balloon of CO. 0.5 mL each of the aliquot was taken with an Ar-purged syringes after 1 h, 2 h, 3 h, 4 h, 5 h, 6 h. Each aliquot was immediately filtered through a short column silica gel (3.5 cm), eluted with ethyl acetate (20 mL), and concentrated. To the crude product was added 3.5  $\mu\text{L}$   $\text{CH}_2\text{Br}_2$  as the internal standard. Then the mixture was analyzed by  $^1\text{H}$ -NMR spectra to determine the recovery data of **1a**. All the data acquired were analyzed by Origin 8.0.

Table S4 Kinetic studies with the standard catalytic formula

| $  \begin{array}{c}  \text{HO} \\    \\  \text{---C---} \equiv \text{---} n\text{-Bu} \\    \\  \text{Ph} \\  (\pm)\text{-1a}  \end{array}  \xrightarrow[\text{Toluene, 50 }^\circ\text{C, CO balloon}]{\begin{array}{l} [(\pi\text{-allyl})\text{PdCl}]_2 \text{ (2 mol\%)} \\ (R)\text{-DTBM-Segphos (6 mol\%)} \\ (\text{PhO})_2\text{POOH (5 mol\%)} \\ \text{MeOH (8 equiv.)} \end{array}}  \begin{array}{c}  \text{Ph} \text{---} \text{C} \text{---} \text{C} \text{---} \text{COOMe} \\    \quad   \\  \text{---} \quad \text{---} \\  (R_a)\text{-2a}  \end{array}  +  \begin{array}{c}  \text{HO} \\    \\  \text{---C---} \equiv \text{---} n\text{-Bu} \\    \\  \text{Ph} \\  (\text{S})\text{-1a}  \end{array}  $ |          |                            |                           |
|---------------------------------------------------------------------------------------------------------------------------------------------------------------------------------------------------------------------------------------------------------------------------------------------------------------------------------------------------------------------------------------------------------------------------------------------------------------------------------------------------------------------------------------------------------------------------------------------------------------------------------------------------------------------------------------------------------------------------------|----------|----------------------------|---------------------------|
| Entry                                                                                                                                                                                                                                                                                                                                                                                                                                                                                                                                                                                                                                                                                                                           | Time / h | NMR yield of <b>2a</b> / % | Recovery of <b>1a</b> / % |
| 1                                                                                                                                                                                                                                                                                                                                                                                                                                                                                                                                                                                                                                                                                                                               | 1        | 8                          | 91                        |
| 2                                                                                                                                                                                                                                                                                                                                                                                                                                                                                                                                                                                                                                                                                                                               | 2        | 20                         | 77                        |
| 3                                                                                                                                                                                                                                                                                                                                                                                                                                                                                                                                                                                                                                                                                                                               | 3        | 30                         | 66                        |
| 4                                                                                                                                                                                                                                                                                                                                                                                                                                                                                                                                                                                                                                                                                                                               | 4        | 40                         | 56                        |
| 5                                                                                                                                                                                                                                                                                                                                                                                                                                                                                                                                                                                                                                                                                                                               | 5        | 45                         | 48                        |
| 6                                                                                                                                                                                                                                                                                                                                                                                                                                                                                                                                                                                                                                                                                                                               | 6        | 48                         | 43                        |

Figure S1 Recovery of **1a** vs. time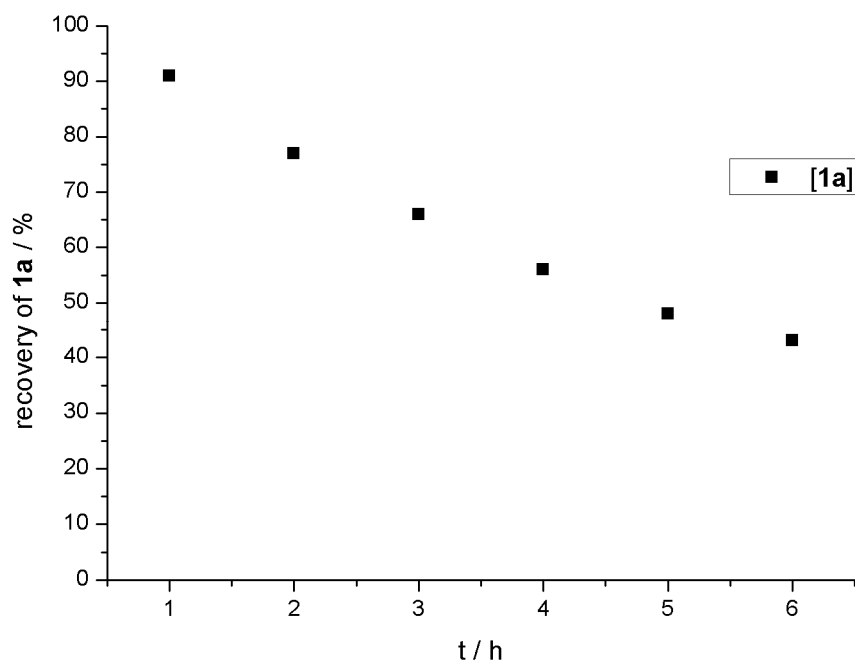

### 3. Synthetic applications

#### (1) Preparation of (2*R*)-2-phenyl-3-(*E*)-octen-2-ol ((2*R*)-*E*-3)<sup>4</sup> (zwl-10-37)

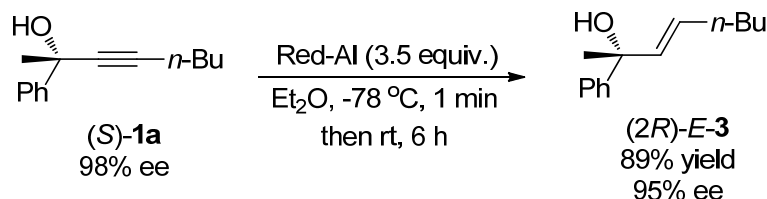

To a flame-dried Schlenk tube were added (*S*)-**1a** (40.3 mg, 0.2 mmol, 98% ee) and ethyl ether (1 mL) under argon. The resulting mixture was then cooled down to -78 °C. To the reaction mixture was added a solution of Red-Al (3.5 M in toluene, 0.2 mL, 0.7 mmol) dropwise in 1 minute at -78 °C. Then the reaction mixture was stirred for 6 h at room temperature and subsequently quenched by dropwise addition of MeOH (2 mL) at -78 °C. To the mixture was added a saturated aqueous solution of potassium sodium tartrate (Rochelle's salt) (2 mL). After extraction with ethyl acetate (2 mL x 3), the organic layer was washed with brine (5 mL) and dried over anhydrous Na<sub>2</sub>SO<sub>4</sub>. After filtration and concentration under reduced pressure, the crude product was purified by column chromatography on silica gel to afford (2*R*)-*E*-**3**<sup>5</sup> (36.2 mg, 89%) as an oil [eluent: petroleum ether /ethyl ether/dichloromethane = 10/1/1]: 95% ee (HPLC conditions: AS-H column, hexane/*i*-PrOH = 98/2, 1.0 mL/min, λ = 214 nm, *t*<sub>R</sub> (minor) = 10.7 min, *t*<sub>R</sub> (major) = 11.3 min); [α]<sub>D</sub><sup>20</sup> = +0.5 (*c* = 1.25, CHCl<sub>3</sub>); <sup>1</sup>H NMR (400 MHz, CDCl<sub>3</sub>): δ = 7.49-7.42 (m, 2 H, Ar-H), 7.38-7.29 (m, 2 H, Ar-H), 7.29-7.20 (m, 1 H, Ar-H), 5.78 (dt, *J*<sub>1</sub> = 15.6 Hz, *J*<sub>2</sub> = 1.2 Hz, 1 H, =CH), 5.67 (dt, *J*<sub>1</sub> = 15.6 Hz, *J*<sub>2</sub> = 6.5 Hz, 1 H, =CH), 2.11-2.01 (m, 2 H, CH<sub>2</sub>), 1.91-1.84 (m, 1 H, OH), 1.63 (s, 3 H, CH<sub>3</sub>), 1.42-1.25 (m, 4 H, 2 x CH<sub>2</sub>), 0.89 (t, *J* = 7.0 Hz, 3 H, CH<sub>3</sub> from *n*-Bu); <sup>13</sup>C NMR (100 MHz, CDCl<sub>3</sub>): δ = 147.3, 136.8, 129.2, 128.1, 126.7, 125.2, 74.4, 31.9, 31.4, 29.9, 22.2, 13.9; MS (70 eV, EI) *m/z* (%): 204 (*M*<sup>+</sup>, 0.98), 147 (100); IR (neat): ν = 3383, 2957, 2926, 2857, 1493, 1446, 1369, 1136, 1091, 1061, 1028 cm<sup>-1</sup>. This reaction could not be monitored by TLC since the *R*<sub>f</sub> values of starting material and product are the same. Prolonging reaction time would be necessary if the propargylic alcohol remains.

## (2) Preparation of (2*R*)-4-iodo-2-phenyl-3-(*E*)-octen-2-ol ((2*R*)-**Z-4**) (zwl-11-38)

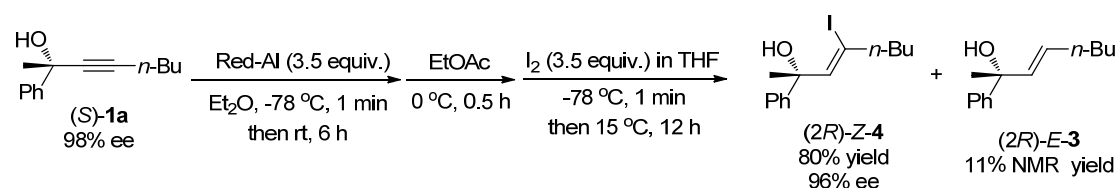

To a flame-dried Schlenk tube were added (S)-**1a** (40.4 mg, 0.2 mmol, 98% ee) and ethyl ether (1 mL) under argon. The resulting mixture was then cooled down to -78 °C. To the reaction mixture was added a solution of Red-Al (3.5 M in toluene, 0.2 mL, 0.7 mmol) dropwise in 1 minute at -78 °C. Then the cooling bath was removed and the mixture was stirred for 6 h at room temperature. After being cooled down to 0 °C, ethyl acetate (0.04 mL) was added and the resulting mixture was stirred at 0 °C for 0.5 h and then cooled down to -78 °C. A solution of I<sub>2</sub> (177.4 mg, 0.7 mmol) in THF (0.4 mL) was added dropwise in 1 minute. Then the reaction mixture was stirred for 12 h at 15 °C and quenched with dropwise addition of a saturated aqueous solution of NaS<sub>2</sub>O<sub>3</sub> (5 mL) at 0 °C. After extraction with ethyl acetate (5 mL x 3), the organic layer was washed with brine (10 mL) and dried over anhydrous Na<sub>2</sub>SO<sub>4</sub>. After filtration and concentration under reduced pressure, the crude product was purified by column chromatography on silica gel to afford (2*R*)-**Z-4** (52.6 mg, 80%) as an oil [eluent: petroleum ether /ethyl acetate/dichloromethane = 40/1/1]: 96% ee (HPLC conditions: IC column, hexane/*i*-PrOH = 400/1, 1.0 mL/min, λ = 214 nm, *t*<sub>R</sub> (major) = 21.8 min, *t*<sub>R</sub> (minor) = 25.4 min); [α]<sup>24</sup><sub>D</sub> = +0.3 (*c* = 1.00, CHCl<sub>3</sub>); <sup>1</sup>H NMR (400 MHz, CDCl<sub>3</sub>): δ = 7.52-7.40 (m, 2 H, Ar-H), 7.38-7.29 (m, 2 H, Ar-H), 7.29-7.21 (m, 1 H, Ar-H), 6.53 (s, 1 H, =CH), 3.19 (s, 1 H, OH), 2.55 (t, *J* = 7.2 Hz, 2 H, CH<sub>2</sub>), 1.64 (s, 3 H, CH<sub>3</sub>), 1.58-1.46 (m, 2 H, CH<sub>2</sub>), 1.41-1.27 (m, 2 H, CH<sub>2</sub>), 0.93 (t, *J* = 7.4 Hz, 3 H, CH<sub>3</sub> from *n*-Bu); <sup>13</sup>C NMR (100 MHz, CDCl<sub>3</sub>): δ = 147.1, 140.3, 128.1, 126.8, 125.8, 108.6, 74.8, 46.4, 32.9, 31.5, 21.3, 13.8; MS (ESI) *m/z* (%): 185 (M - I - H<sub>2</sub>O)<sup>+</sup>; IR (neat): ν = 3444, 2956, 2928, 2858, 1627, 1492, 1446, 1370, 1336, 1113, 1090, 1065, 1028 cm<sup>-1</sup>; HRMS calcd for C<sub>14</sub>H<sub>19</sub>OI [M<sup>+</sup>]: 330.0481, found: 330.0484. Prolonging reaction time at room temperature would be necessary before the addition of ethyl acetate if the propargylic alcohol remains.

**(3) Preparation of (*S<sub>a</sub>*)-*N*-methoxy-2-(2-phenyl-2,3-octadien-4-yl)benzamide ((*S<sub>a</sub>*)-6a)<sup>6</sup> (zwl-10-18)**

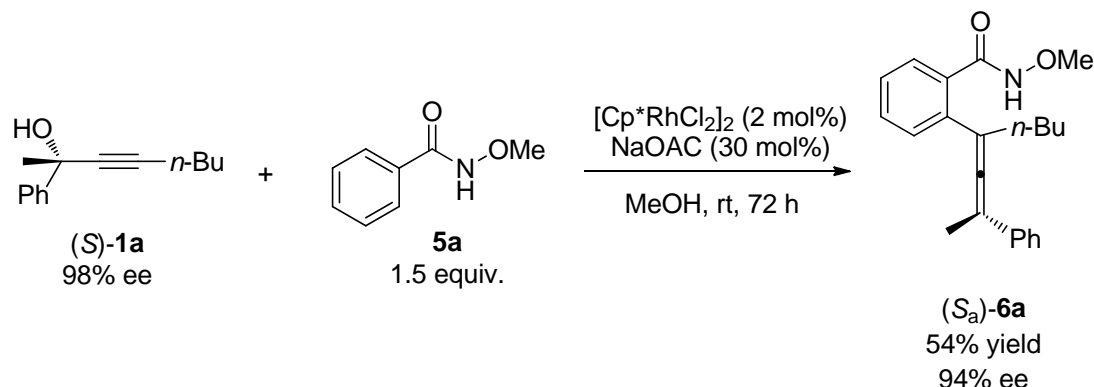

To a Schlenk tube were added  $[\text{Cp}^*\text{RhCl}_2]_2$  (2.5 mg, 0.004 mmol), *N*-methoxybenzamide **5a**<sup>6</sup> (45.1 mg, 0.3 mmol), NaOAc (4.9 mg, 0.06 mmol), (*S*)-**1a** (40.6 mg, 0.2 mmol, 98% ee), and MeOH (1.2 mL) sequentially at room temperature. After being stirred for 72 h at room temperature, the reaction was complete as monitored by TLC. After filtration through a short column of silica gel (eluent: ethyl acetate 20 mL) and evaporation under reduced pressure, the crude product was purified by flash column chromatography on silica gel to afford (*S<sub>a</sub>*)-**6a** (39.0 mg, 54%, 93% purity) as an oil [eluent: petroleum ether/ethyl acetate/dichloromethane = 10/1/0.5]: 94% ee (HPLC conditions: IC column, hexane/*i*-PrOH = 90/10, 1.0 mL/min,  $\lambda = 214$  nm,  $t_R$  (major) = 10.4 min,  $t_R$  (minor) = 11.4 min);  $[\alpha]_D^{26} = +309.4$  ( $c = 1.67$ ,  $\text{CHCl}_3$ );  $^1\text{H}$  NMR (400 MHz,  $\text{CDCl}_3$ ):  $\delta = 8.83$  (brs, 1 H, NH), 7.55-7.11 (m, 9 H, Ar-H), 3.79 (s, 3 H,  $\text{OCH}_3$ ), 2.59-2.28 (m, 2 H,  $\text{CH}_2$ ), 2.18 (s, 3 H,  $\text{CH}_3$ ), 1.57-1.43 (m, 2 H,  $\text{CH}_2$ ), 1.43-1.31 (m, 2 H,  $\text{CH}_2$ ), 0.87 (t,  $J = 7.4$  Hz, 3 H,  $\text{CH}_3$  from *n*-Bu);  $^{13}\text{C}$  NMR (100 MHz,  $\text{CDCl}_3$ ):  $\delta = 203.7, 167.5, 137.5, 137.2, 131.6, 130.6, 129.4, 128.8, 128.7, 128.33, 128.25, 127.1, 126.7, 125.6, 107.4, 102.6, 64.2, 33.8, 30.0, 22.3, 16.7, 13.8$ ; MS (70 eV, EI)  $m/z$  (%): 336 ( $\text{M}^+ + 1$ , 3.67), 335 ( $\text{M}^+$ , 14.94), 260 (100); IR (neat):  $\nu = 3195, 2955, 2930, 2870, 2242, 1944, 1651, 1597, 1493, 1462, 1440, 1371, 1299, 1027$   $\text{cm}^{-1}$ ; HRMS calcd for  $\text{C}_{22}\text{H}_{25}\text{NO}_2$  [ $\text{M}^+$ ]: 335.1885, found: 335.1886.

**(4) Preparation of (*S<sub>a</sub>*)-*N*-methoxy-4-bromo-2-(2-phenyl-2,3-octadien-4-yl)-benzamide ((*S<sub>a</sub>*)-**6b**)<sup>6</sup> (zwl-10-50)**

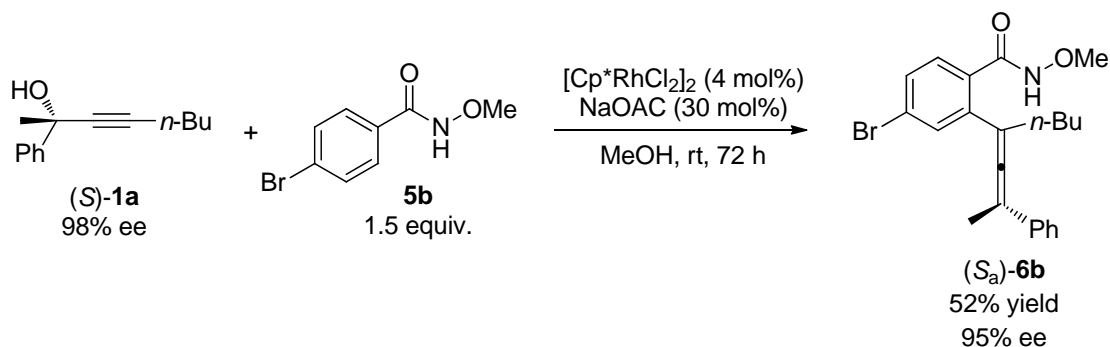

To a Schlenk tube were added  $[\text{Cp}^*\text{RhCl}_2]_2$  (4.9 mg, 0.008 mmol), *N*-methoxy-4-bromobenzamide **5b**<sup>6</sup> (69.2 mg, 0.3 mmol), NaOAc (5.0 mg, 0.06 mmol), (*S*)-**1a** (40.6 mg, 0.2 mmol, 98% ee), and MeOH (1.2 mL) sequentially at room temperature. After being stirred for 72 h at room temperature, the reaction was complete as monitored by TLC. After filtration through a short column of silica gel (eluent: ethyl acetate 20 mL) and evaporation under reduced pressure, the crude product was purified by flash column chromatography on silica gel to afford (*S<sub>a</sub>*)-**6b** (47.3 mg, 52%, 91% purity) as an oil [eluent: petroleum ether/ethyl acetate/dichloromethane = 10/1/0.5]: 95% ee (HPLC conditions: IC column, hexane/*i*-PrOH = 95/5, 1.0 mL/min,  $\lambda$  = 214 nm,  $t_R$  (major) = 11.6 min,  $t_R$  (minor) = 12.5 min);  $[\alpha]_D^{26} = +198.4$  ( $c$  = 0.62,  $\text{CHCl}_3$ );  $^1\text{H}$  NMR (400 MHz,  $\text{CDCl}_3$ ):  $\delta$  = 8.93 (brs, 1 H, NH), 7.48 (s, 1 H, Ar-H), 7.43-7.23 (m, 6 H, Ar-H), 7.23-7.14 (m, 1 H, Ar-H), 3.77 (s, 3 H,  $\text{OCH}_3$ ), 2.65-2.30 (m, 2 H,  $\text{CH}_2$ ), 2.17 (s, 3 H,  $\text{CH}_3$ ), 1.59-1.43 (m, 2 H,  $\text{CH}_2$ ), 1.43-1.31 (m, 2 H,  $\text{CH}_2$ ), 0.88 (t,  $J$  = 7.6 Hz, 3 H,  $\text{CH}_3$  from *n*-Bu);  $^{13}\text{C}$  NMR (100 MHz,  $\text{CDCl}_3$ ):  $\delta$  = 203.9, 166.6, 139.6, 136.8, 132.0, 130.6, 130.2, 130.0, 128.4, 127.7, 127.0, 126.3, 125.7, 124.8, 106.4, 103.5, 64.3, 33.5, 29.9, 22.3, 16.6, 13.8; MS (70 eV, EI)  $m/z$  (%): 415 ( $\text{M}^+(\text{}^{81}\text{Br})$ , 9.12), 413 ( $\text{M}^+(\text{}^{79}\text{Br})$ , 9.39), 43 (100); IR (neat):  $\nu$  = 3179, 2955, 2929, 2859, 1737, 1655, 1579, 1556, 1493, 1462, 1441, 1372, 1240, 1079, 1028  $\text{cm}^{-1}$ ; HRMS calcd for  $\text{C}_{22}\text{H}_{24}\text{NO}_2\text{}^{79}\text{Br}$  [ $\text{M}^+$ ]: 413.0990, found: 413.0995.

## References:

1. S. Ma, B. Wu, X. Jiang and S. Zhao, *J. Org. Chem.*, 2005, **70**, 2568.
2. Kagan, H. B.; Fiaud, J. C. *Top. Stereochem.* **1988**, *18*, 249.
3. S. Kotani, K. Kukita, K. Tanaka, T. Ichibakase and M. Nakajima, *J. Org. Chem.*, **2014**, *79*, 4817.
4. T. Ueda, K. Tanaka, T. Ichibakase, Y. Orito and M. Nakajima, *Tetrahedron*, **2010**, *66*, 7726.
5. Y. Li, S. Chakrabarty and A. Studer, *Angew. Chem. Int. Ed.*, **2015**, *54*, 3587.
6. S. Wu, X. Huang, C. Fu and S. Ma, *Org. Chem. Front.*, **2017**, *4*, 2002.

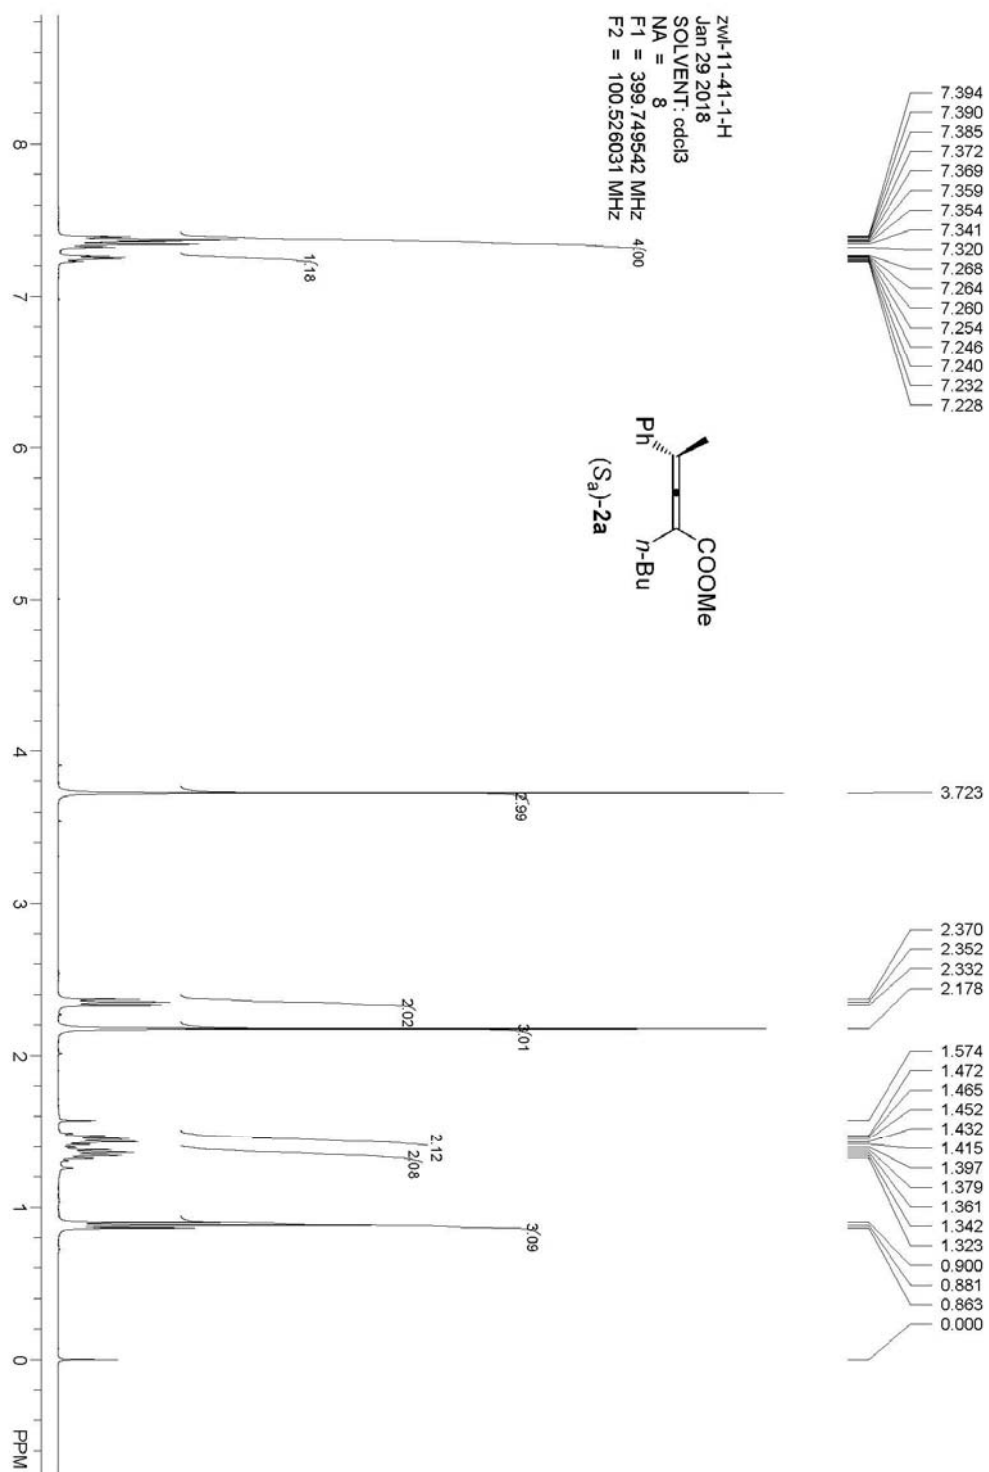

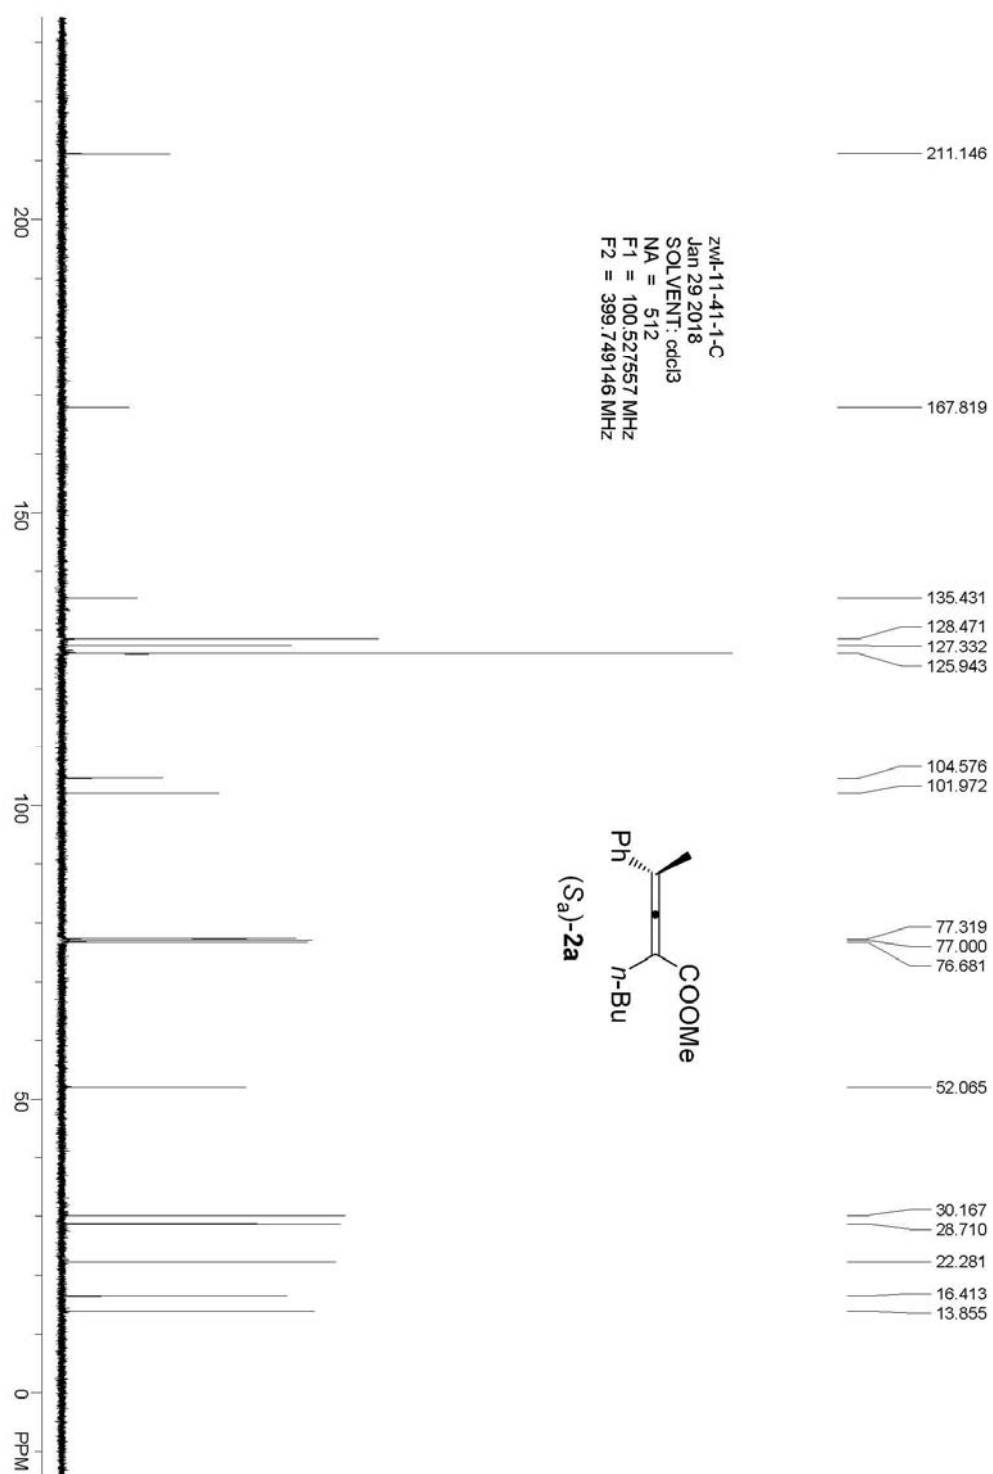

# zw1-11-41-1

实验时间: 2018-01-29, 14:40:26

报告时间: 2018-01-29, 14:52:40

谱图文件: E:\data\zw1\zw1-11-41-1-whelk-s, s-200-1-1-214-18.1.29.org

Brief introduction of experimental conditions

实验内容简介:  
zw1-11-41-1-whelk-s, s-200-1-1-214

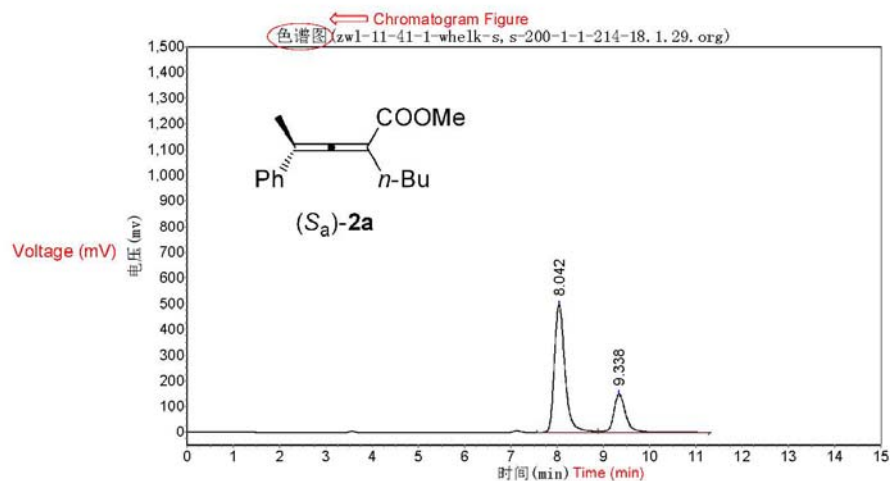

分析结果表

| 峰号 (Peak No.) | 峰名 (Peak name) | 保留时间 (Retention time) | 峰高 (Peak height) | 峰面积 (Peak area) | 含量 (Content) |
|---------------|----------------|-----------------------|------------------|-----------------|--------------|
| 1             |                | 8.042                 | 496307.219       | 7944497.000     | 73.9965      |
| 2             |                | 9.338                 | 148625.797       | 2791813.250     | 26.0035      |
| 总计            |                |                       | 644933.016       | 10736310.250    | 100.0000     |

## zw1-9-139

实验时间: 2018-01-29, 14:21:05  
谱图文件: E:\data\zw1\zw1-9-139-whelk-s, s-200-1-1-214-18.1.29.org

报告时间: 2018-01-29, 14:50:14

实验内容简介: Brief introduction of experimental conditions  
zw1-9-139-whelk-s, s-200-1-1-214

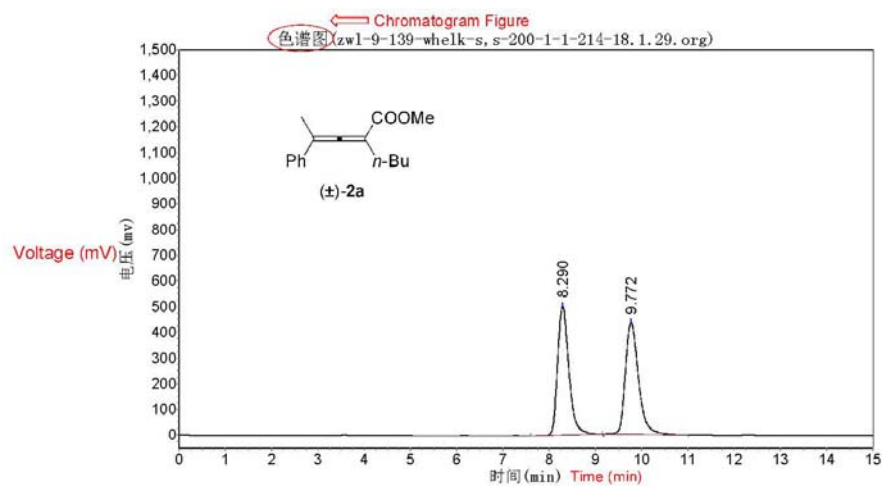

分析结果表

| 峰号 (Peak No.) | 峰名 (Peak name) | 保留时间 (Retention time) | 峰高 (Peak height) | 峰面积 (Peak area) | 含量 (Content) |
|---------------|----------------|-----------------------|------------------|-----------------|--------------|
| 1             |                | 8.290                 | 500491.938       | 8495500.000     | 49.6469      |
| 2             |                | 9.772                 | 434477.281       | 8616346.000     | 50.3531      |
| 总计            |                |                       | 934969.219       | 17111846.000    | 100.0000     |

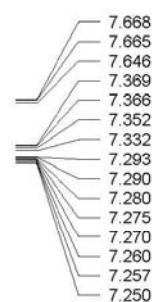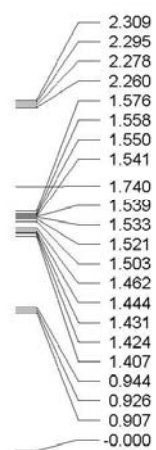

zw4-11-41-2-H  
Jan 29 2018  
SOLVENT: cdcl3  
NA = 8  
F1 = 399.749542 MHz  
F2 = 100.526031 MHz

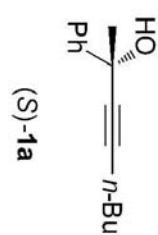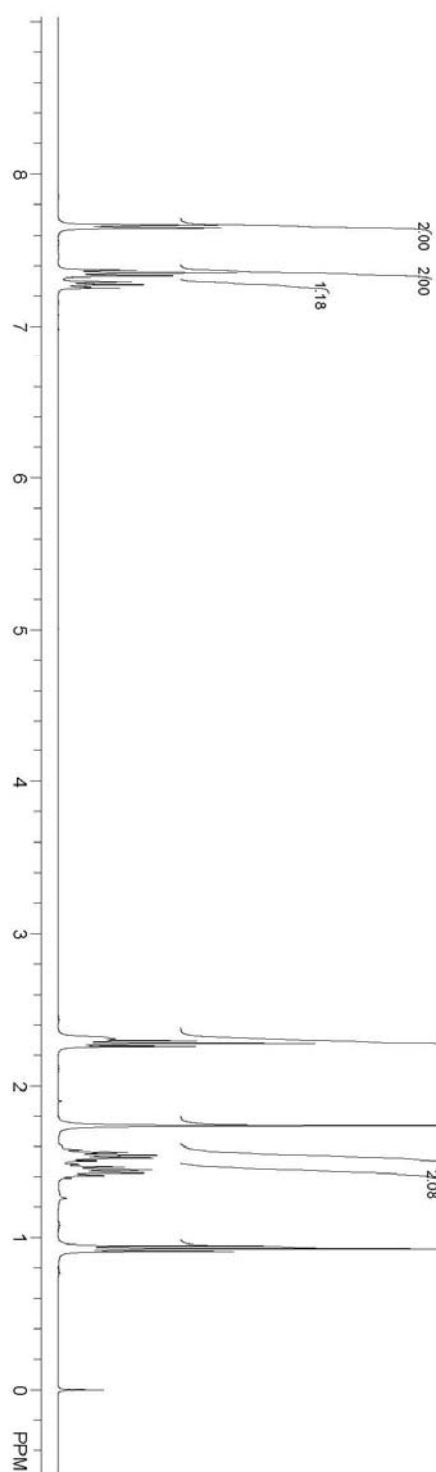

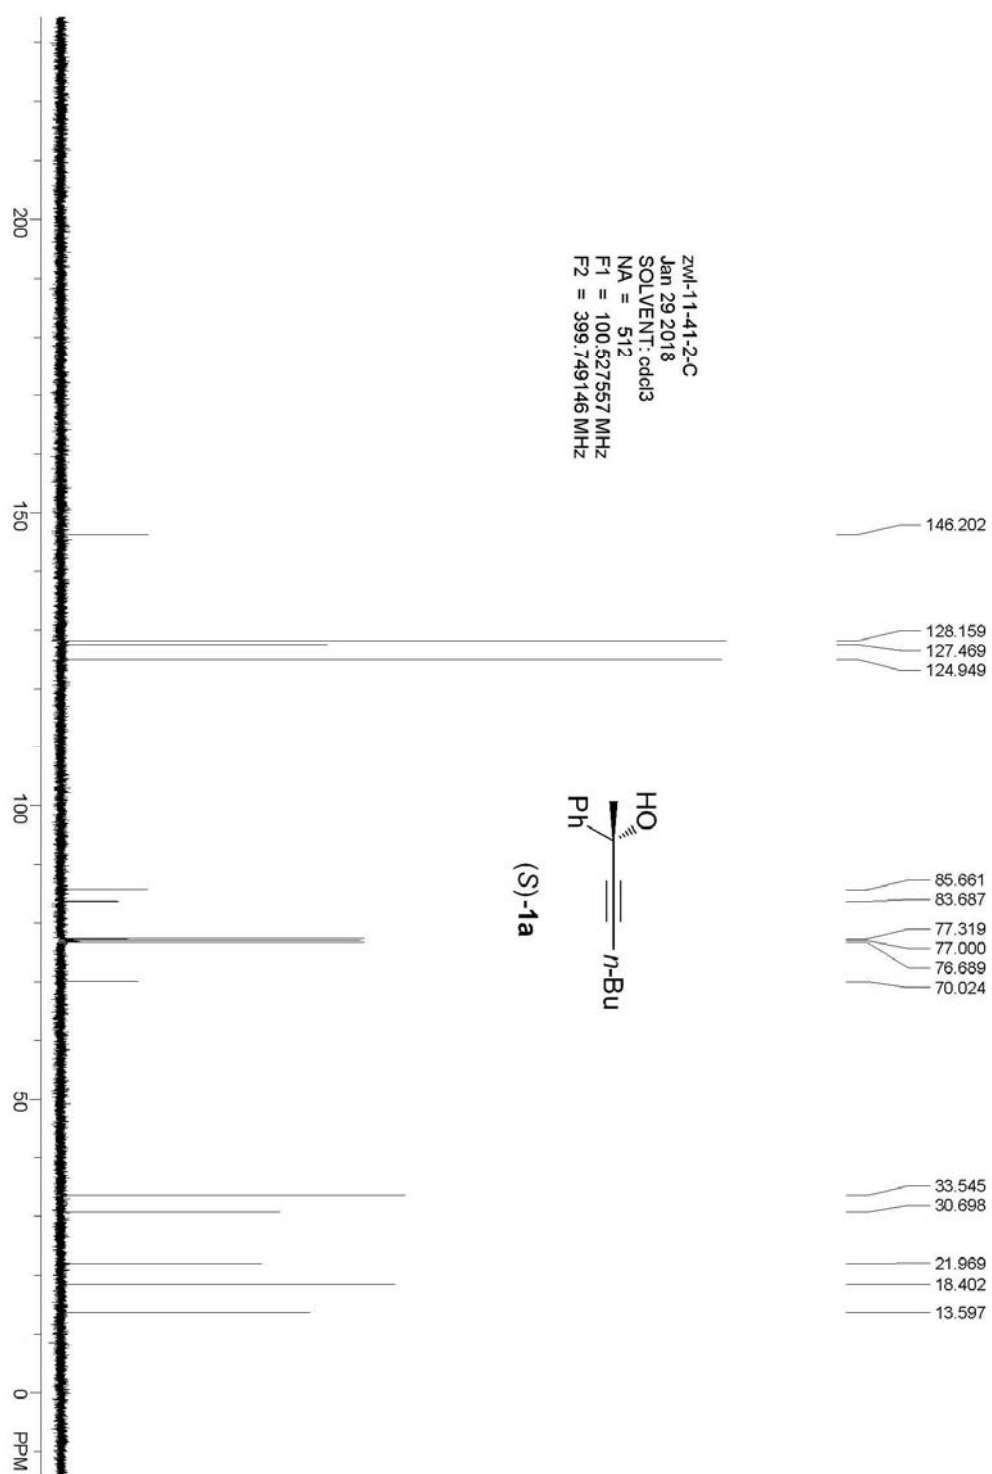

## zw1-11-41-2

实验时间: 2018-01-29, 10:08:44  
 谱图文件: E:\data\zw1\zw1-11-41-2-od-h-200-1-1-214-18.1.29.org

报告时间: 2018-01-29, 10:40:34

实验内容简介: Brief introduction of experimental conditions  
 zw1-11-41-2-od-h-200-1-1-214

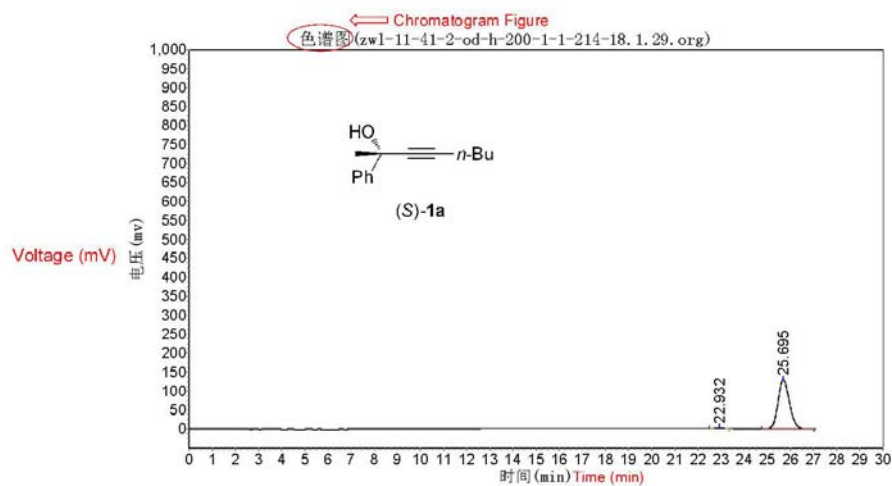

分析结果表

| 峰号 (Peak No.) | 峰名 (Peak name) | 保留时间 (Retention time) | 峰高 (Peak height) | 峰面积 (Peak area) | 含量 (Content) |
|---------------|----------------|-----------------------|------------------|-----------------|--------------|
| 1             |                | 22.932                | 1823.750         | 47134.945       | 1.0650       |
| 2             |                | 25.695                | 128680.680       | 4378590.000     | 98.9350      |
| 总计            |                |                       | 130504.429       | 4425724.945     | 100.0000     |

# zw1-10-177

实验时间: 2018-01-29, 9:09:05

报告时间: 2018-01-29, 9:42:01

谱图文件: E:\data\zw1\zw1-10-177-od-h-200-1-1-214-18.1.29.org

← Brief introduction of experimental conditions

实验内容简介:

zw1-10-177-od-h-200-1-1-214

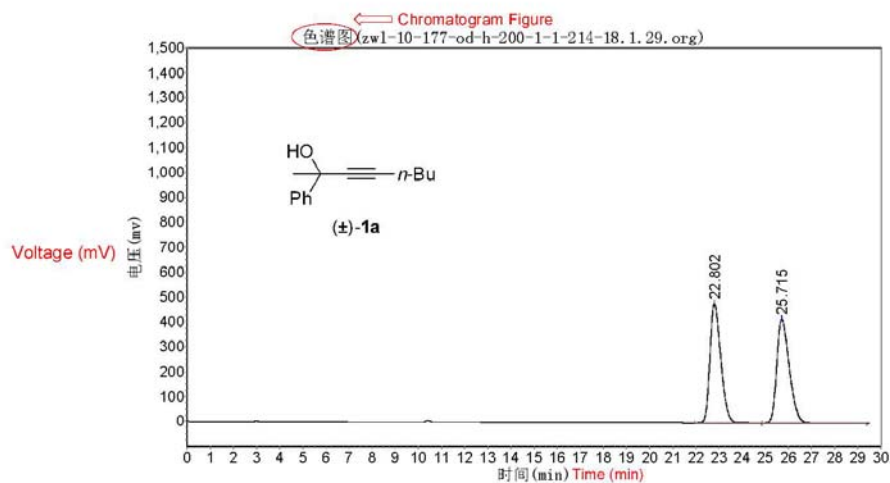

分析结果表

| 峰号 (Peak No.) | 峰名 (Peak name) | 保留时间 (Retention time) | 峰高 (Peak height) | 峰面积 (Peak area) | 含量 (Content) |
|---------------|----------------|-----------------------|------------------|-----------------|--------------|
| 1             |                | 22.802                | 477322.750       | 15513478.000    | 49.9342      |
| 2             |                | 25.715                | 416485.000       | 15554379.000    | 50.0658      |
| 总计            |                |                       | 893807.750       | 31067857.000    | 100.0000     |

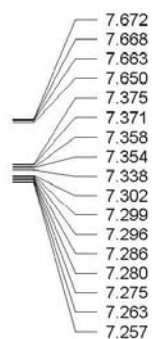

zmh-10-130-H  
Oct 30 2017  
SOLVENT: cdcl3  
NA = 4  
F1 = 399.749542 MHz  
F2 = 100.526031 MHz

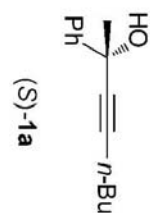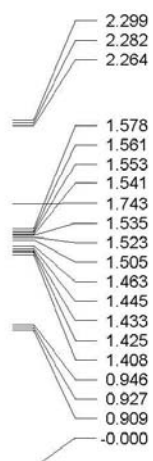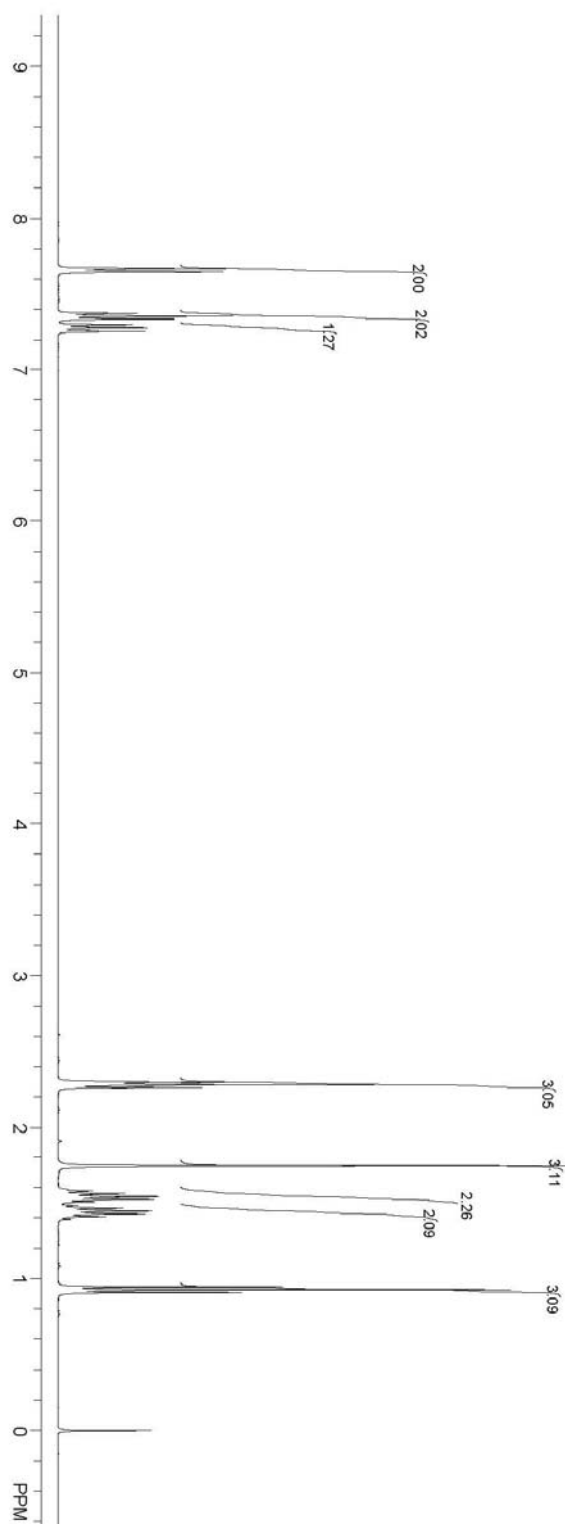

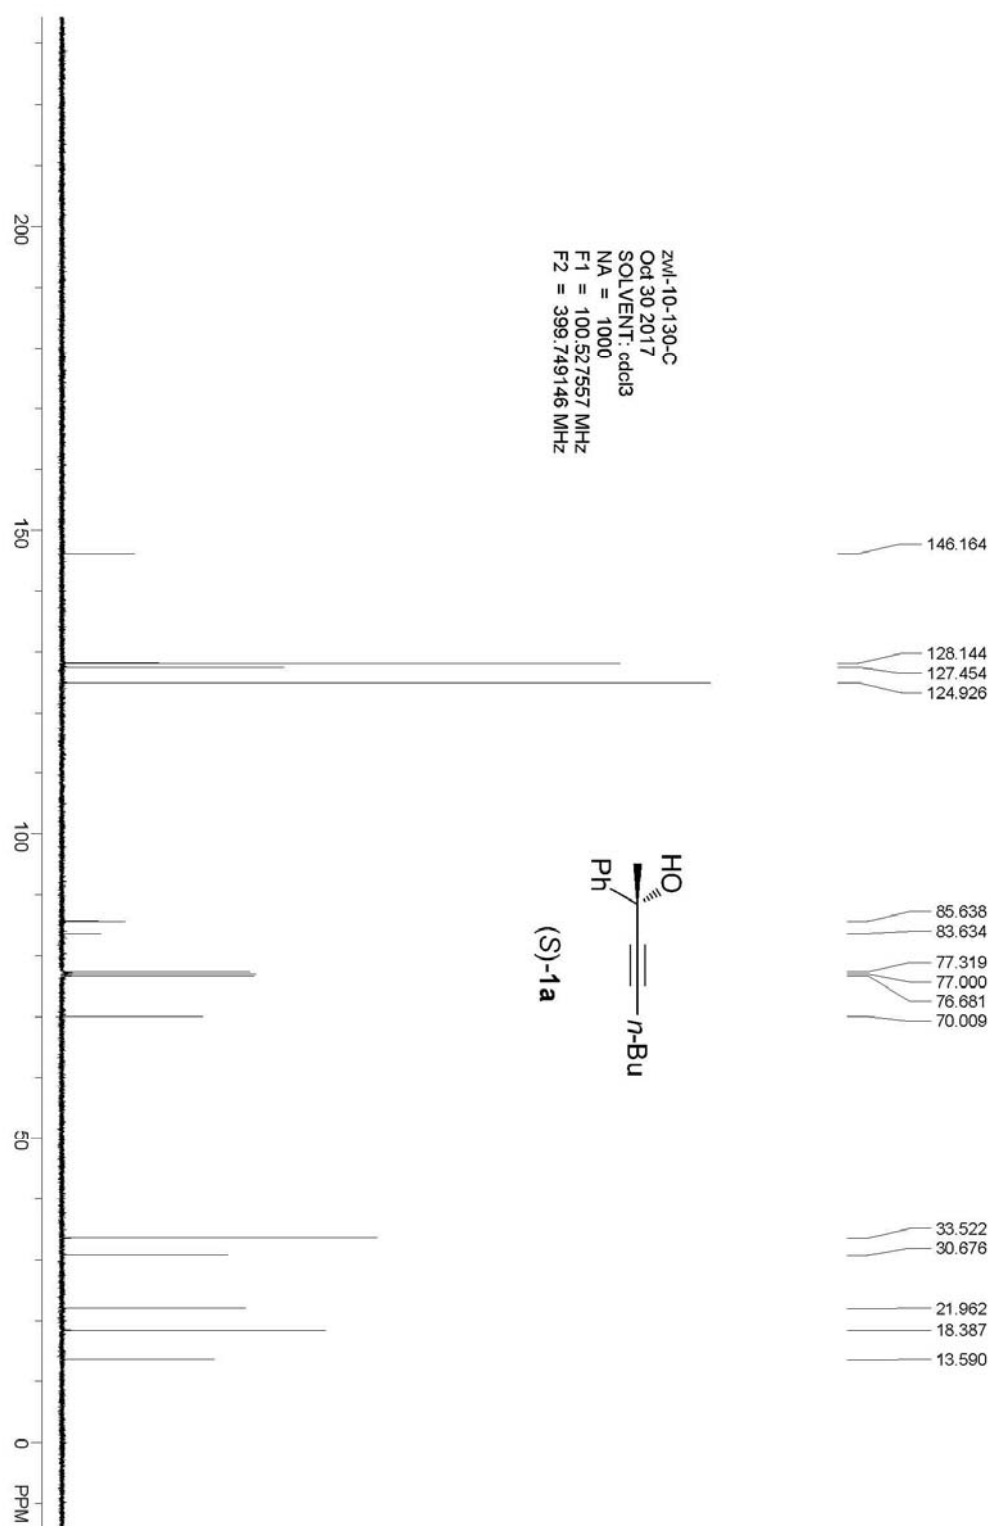

## zw1-10-130

实验时间: 2017-10-29, 14:01:42

报告时间: 2017-10-29, 14:33:50

谱图文件: E:\data\zw1\zw1-10-130-od-h-200-1-1-214.org

方法文件: E:\data\zw1\zw1.mtd

← Brief introduction of experimental conditions

实验内容简介:

zw1-10-130-od-h-200-1-1-214

← Chromatogram Figure

色谱图 (zw1-10-130-od-h-200-1-1-214.org)

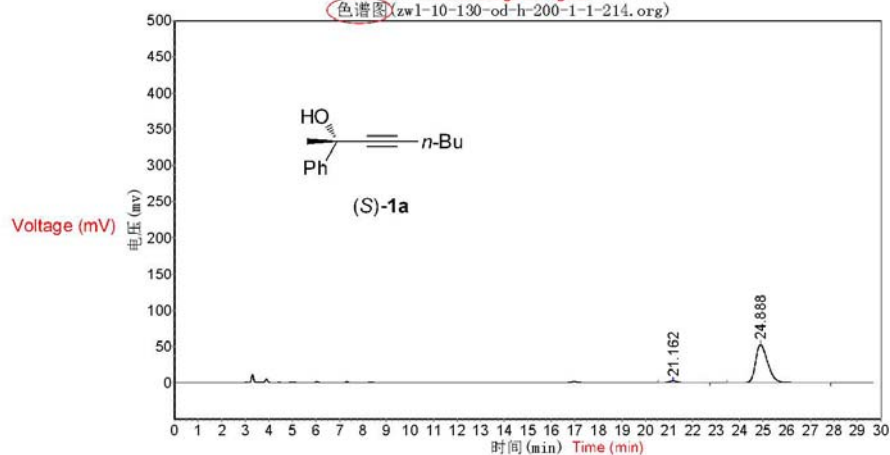

分析结果表

| 峰号 (Peak No.) | 峰名 (Peak name) | 保留时间 (Retention time) | 峰高 (Peak height) | 峰面积 (Peak area) | 含量 (Content) |
|---------------|----------------|-----------------------|------------------|-----------------|--------------|
| 1             |                | 21.162                | 1963.569         | 56631.250       | 2.9201       |
| 2             |                | 24.888                | 52727.469        | 1882736.125     | 97.0799      |
| 总计            |                |                       | 54691.038        | 1939367.375     | 100.0000     |

# zw1-9-184

实验时间: 2017-10-29, 13:33:24 报告时间: 2017-10-29, 14:03:16  
 谱图文件: E:\data\zw1\zw1-9-184-od-h-200-1-1-214-17.10.29.org  
 方法文件: E:\data\zw1\zw1.mtd

实验内容简介: Brief introduction of experimental conditions  
 zw1-9-184-od-h-200-1-1-214

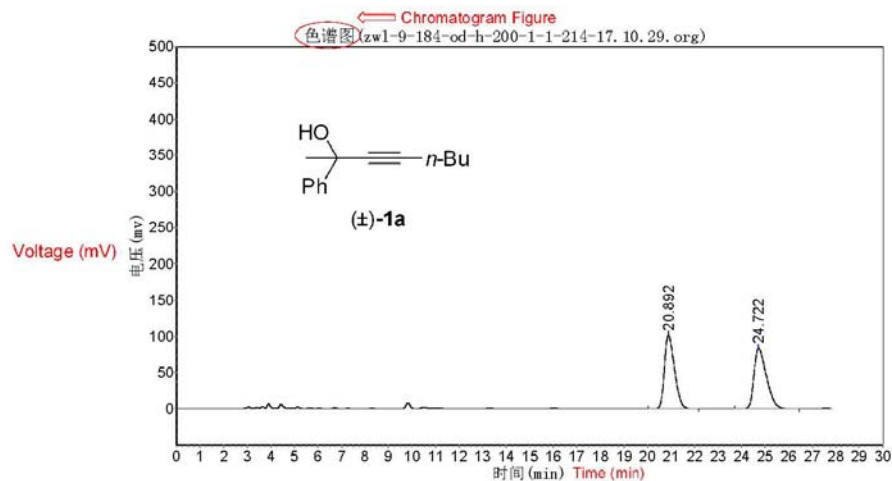

分析结果表

| 峰号 (Peak No.) | 峰名 (Peak name) | 保留时间 (Retention time) | 峰高 (Peak height) | 峰面积 (Peak area) | 含量 (Content) |
|---------------|----------------|-----------------------|------------------|-----------------|--------------|
| 1             |                | 20.892                | 101460.320       | 3007729.750     | 49.6040      |
| 2             |                | 24.722                | 83459.898        | 3055757.750     | 50.3960      |
| 总计            |                |                       | 184920.219       | 6063487.500     | 100.0000     |

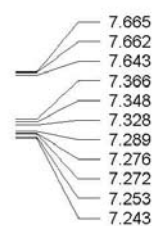

zwl-11-51-H  
 Mar 1 2018  
 SOLVENT: cdcl3  
 NA = 4  
 F1 = 399.749542 MHz  
 F2 = 100.526031 MHz

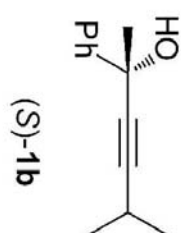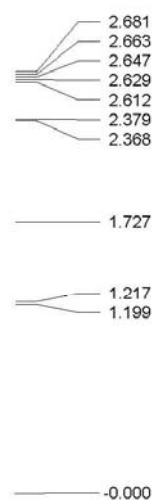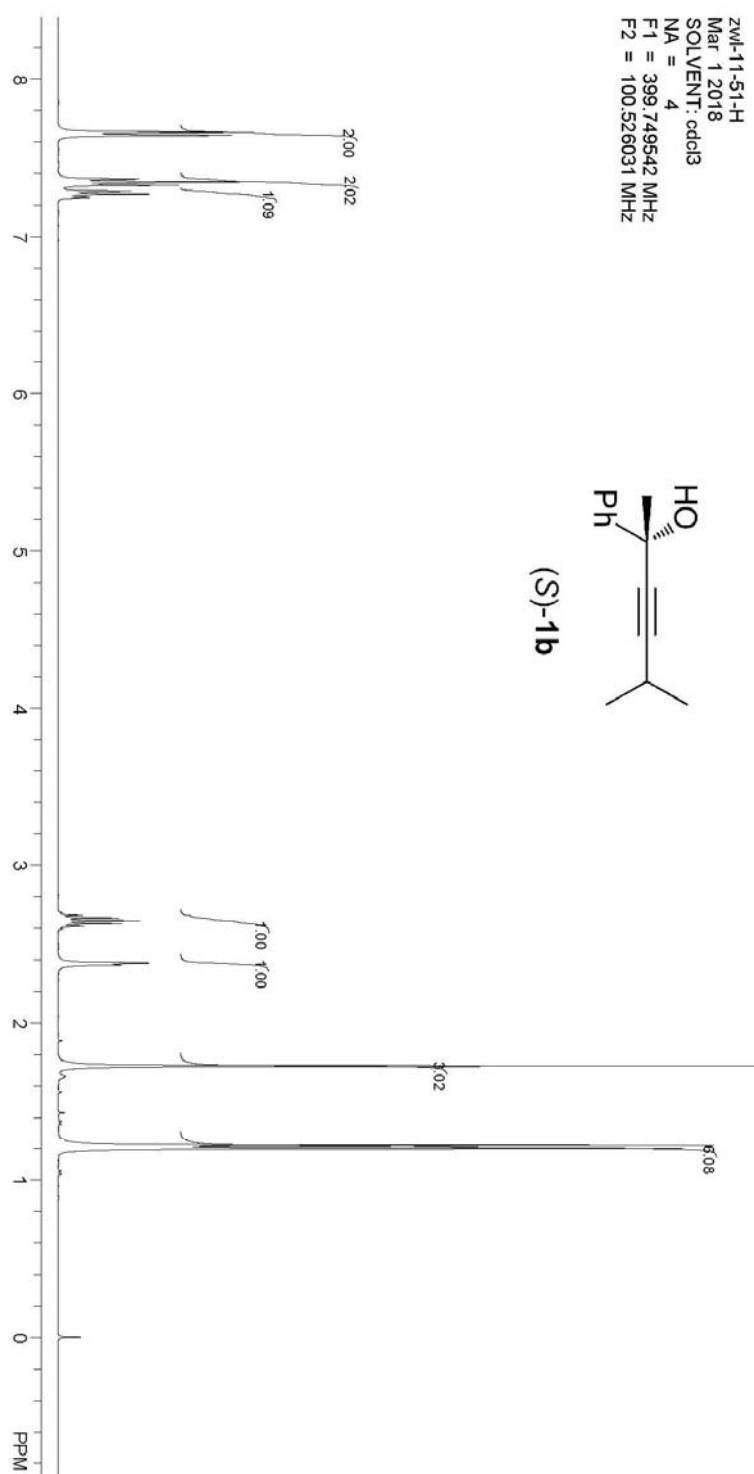

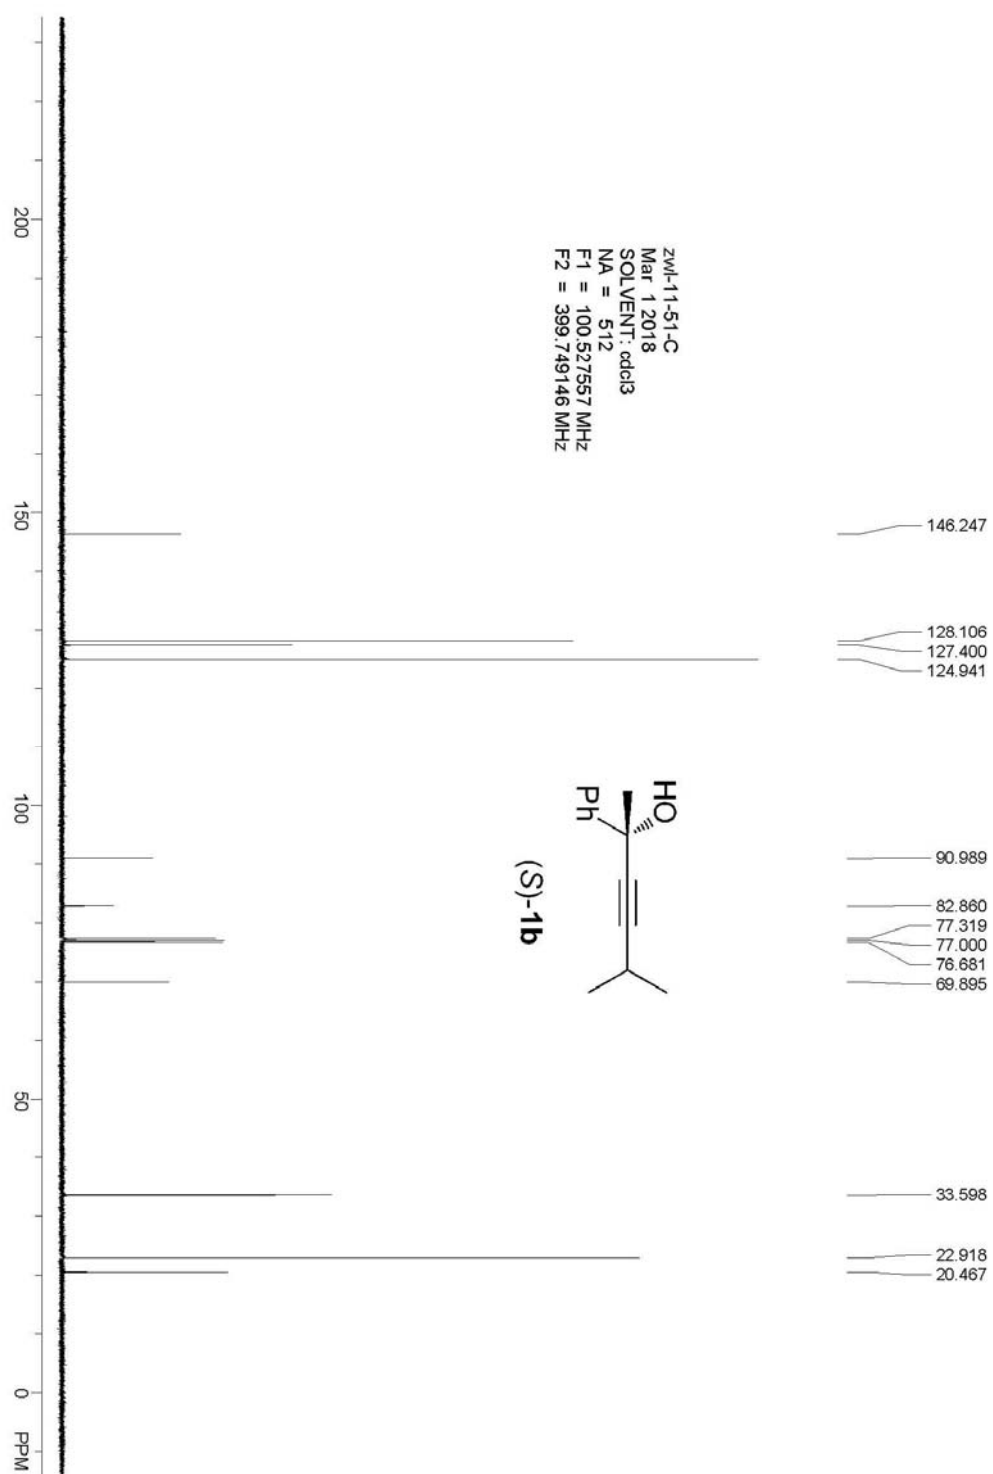

zw1-11-51-wheelk-r, r-100-1-1-214

实验时间: 2018-03-05, 17:54:12  
请图文件: D:\zhuguangjiang\zw1\20180305\zw1-11-51-wheelk-r, r-100-1-1-214. org

报告时间: 2018-03-05, 19:29:56

实验内容简介:

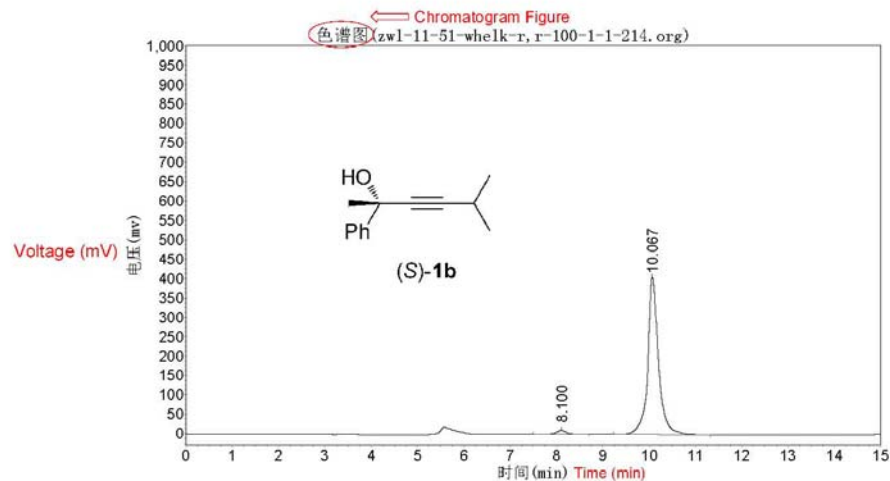

分析结果表

| 峰号 (Peak No.) | 峰名 (Peak name) | 保留时间 (Retention time) | 峰高 (Peak height) | 峰面积 (Peak area) | 含量 (Content) |
|---------------|----------------|-----------------------|------------------|-----------------|--------------|
| 1             |                | 8.100                 | 10248.888        | 142264.516      | 2.1192       |
| 2             |                | 10.067                | 406127.938       | 6570812.500     | 97.8808      |
| 总计            |                |                       | 416376.825       | 6713077.016     | 100.0000     |

zw1-11-47-wheelk-r, r-100-1-1-214

实验时间: 2018-03-05, 17:34:13  
请图文件: D:\zhuguangjiang\zw1\20180305\zw1-11-47-wheelk-r, r-100-1-1-214. org  
报告时间: 2018-03-05, 19:26:45

实验内容简介:

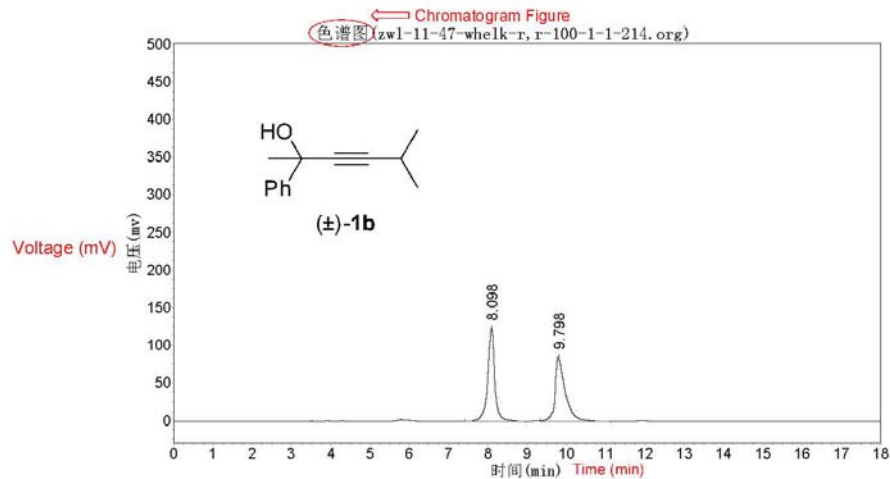

分析结果表

| 峰号(Peak No.) | 峰名(Peak name) | 保留时间(Retention time) | 峰高(Peak height) | 峰面积(Peak area) | 含量(Content) |
|--------------|---------------|----------------------|-----------------|----------------|-------------|
| 1            |               | 8.098                | 122880.539      | 1531053.875    | 50.2793     |
| 2            |               | 9.798                | 84950.438       | 1514043.500    | 49.7207     |
| 总计           |               |                      | 207830.977      | 3045097.375    | 100.0000    |

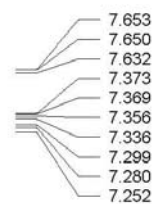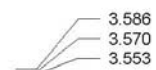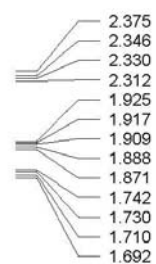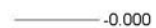

zw/-11-53-H  
Mar 1 2018  
SOLVENT: cdcl3  
NA = 4  
F1 = 399.749542 MHz  
F2 = 100.526031 MHz

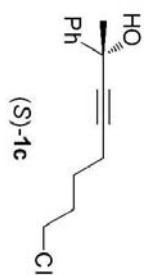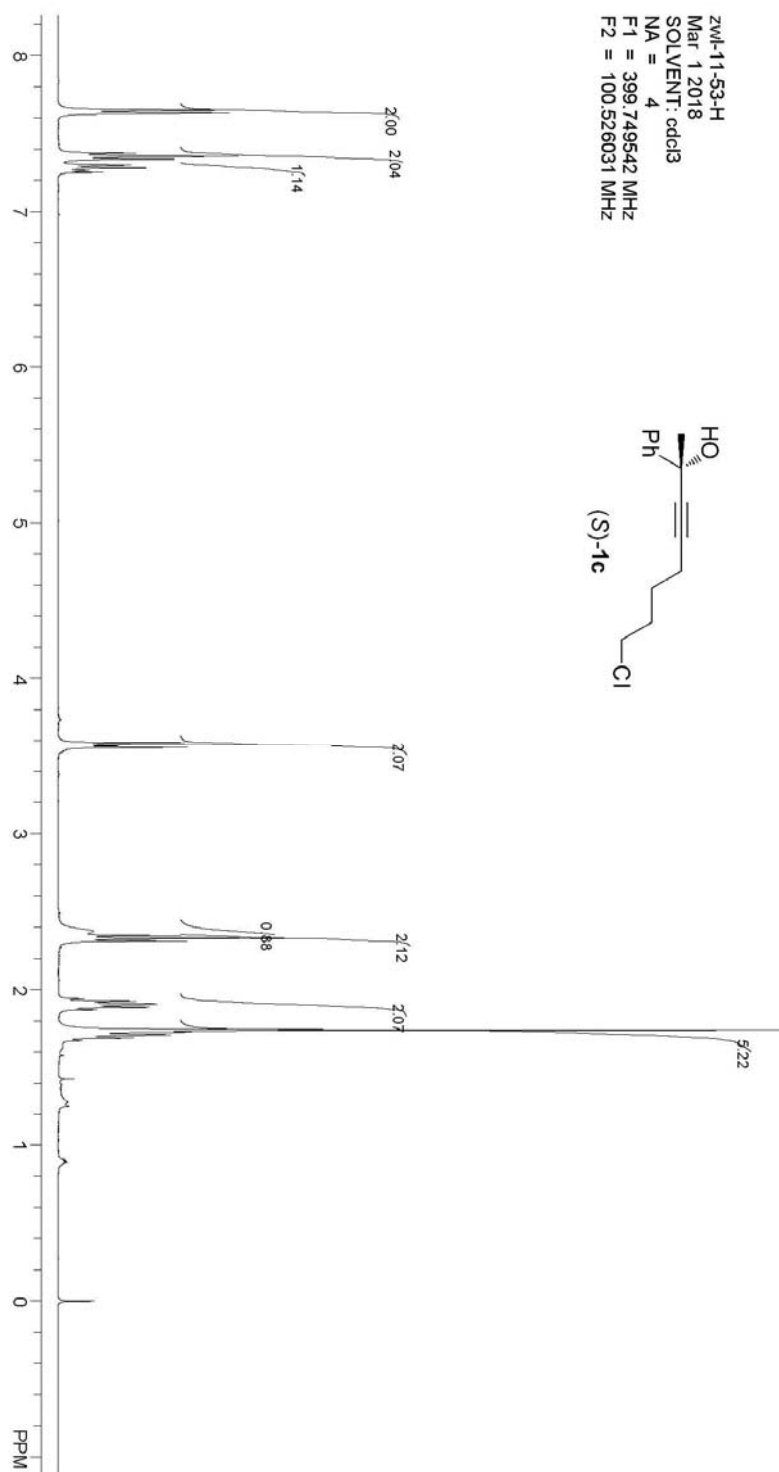

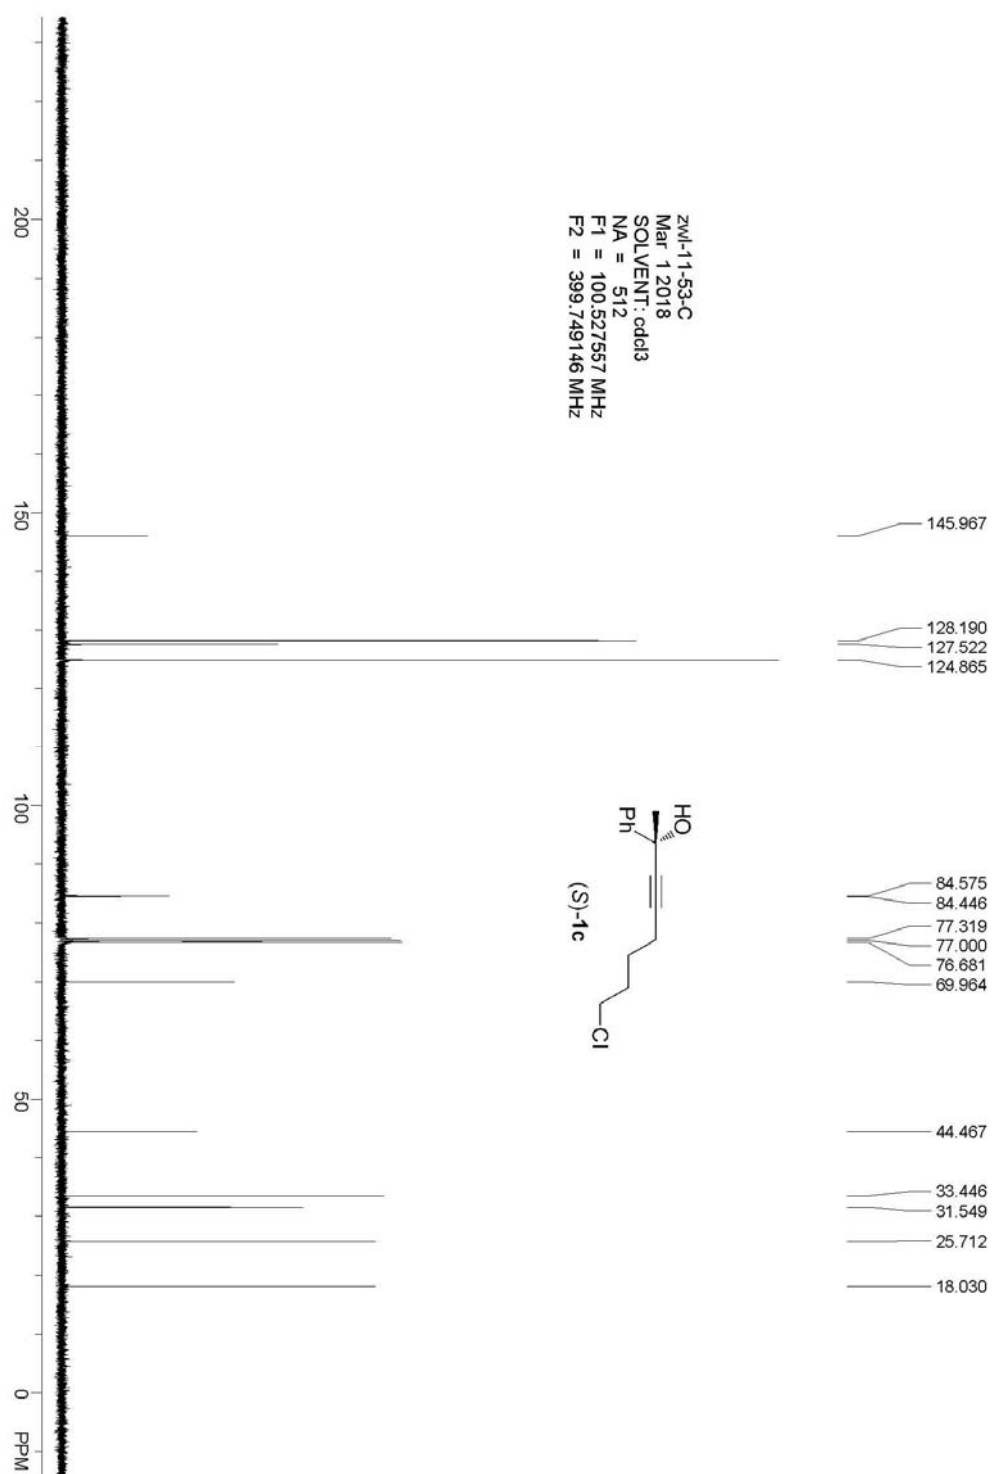

zw1-11-53-wheelk-r, r-100-1-1-214

实验时间: 2018-03-05, 9:50:11  
报告时间: 2018-03-05, 19:33:41  
谱图文件: D:\zhuguangji\zw1\20180305\zw1-11-53-wheelk-r, r-100-1-1-214. org

实验内容简介:

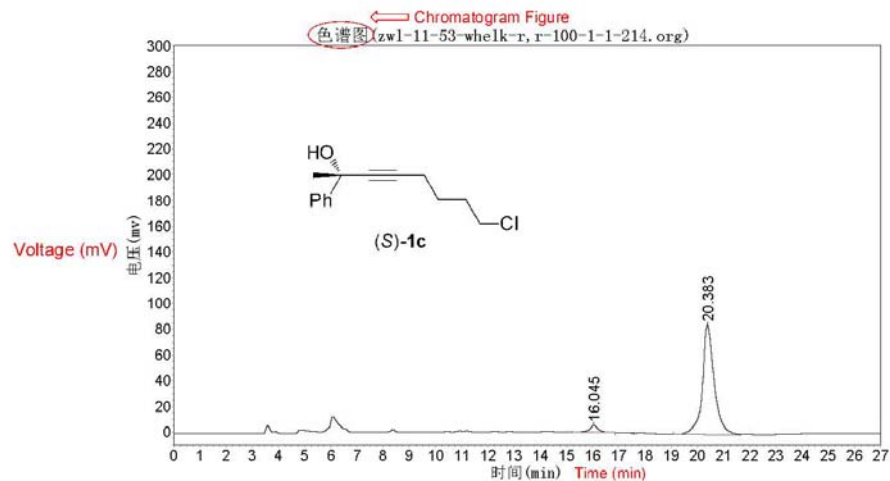

分析结果表

| 峰号 (Peak No.) | 峰名 (Peak name) | 保留时间 (Retention time) | 峰高 (Peak height) | 峰面积 (Peak area) | 含量 (Content) |
|---------------|----------------|-----------------------|------------------|-----------------|--------------|
| 1             |                | 16.045                | 5581.602         | 136916.781      | 4.8496       |
| 2             |                | 20.383                | 85107.570        | 2686343.500     | 95.1504      |
| 总计            |                |                       | 90689.172        | 2823260.281     | 100.0000     |

zw1-8-119-wheelk-r, r-100-1-1-214

实验时间: 2018-03-05, 10:46:32  
报告时间: 2018-03-05, 19:31:22  
谱图文件: D:\zhuguangjiang\zw1\20180305\zw1-8-119-wheelk-r, r-100-1-1-214. org

实验内容简介:

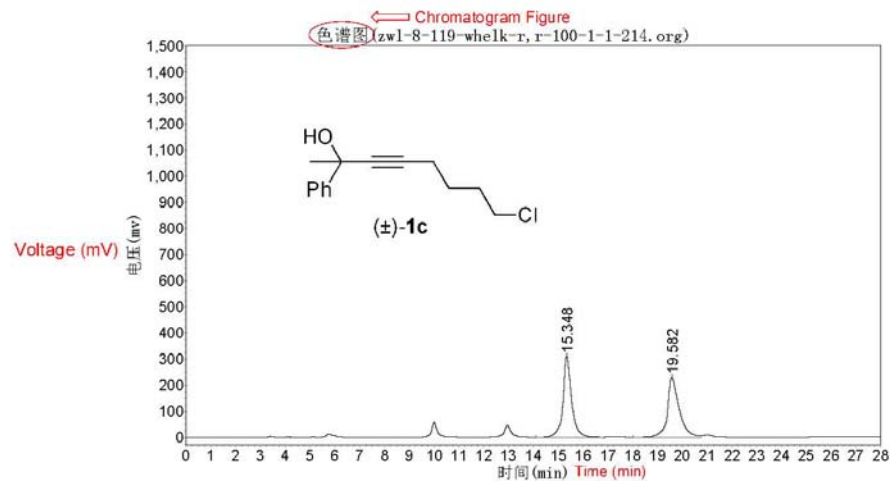

分析结果表

| 峰号 (Peak No.) | 峰名 (Peak name) | 保留时间 (Retention time) | 峰高 (Peak height) | 峰面积 (Peak area) | 含量 (Content) |
|---------------|----------------|-----------------------|------------------|-----------------|--------------|
| 1             |                | 15.348                | 310365.969       | 7532668.000     | 49.9841      |
| 2             |                | 19.582                | 228387.781       | 7537453.000     | 50.0159      |
| 总计            |                |                       | 538753.750       | 15070121.000    | 100.0000     |

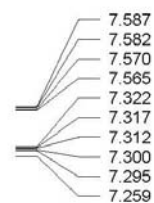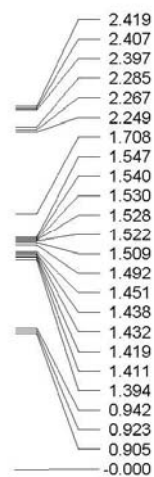

zwl-8-72  
Jul 16 2016  
SOLVENT: cdcl3  
NA = 8  
F1 = 399.749542 MHz  
F2 = 100.526031 MHz

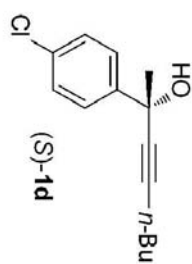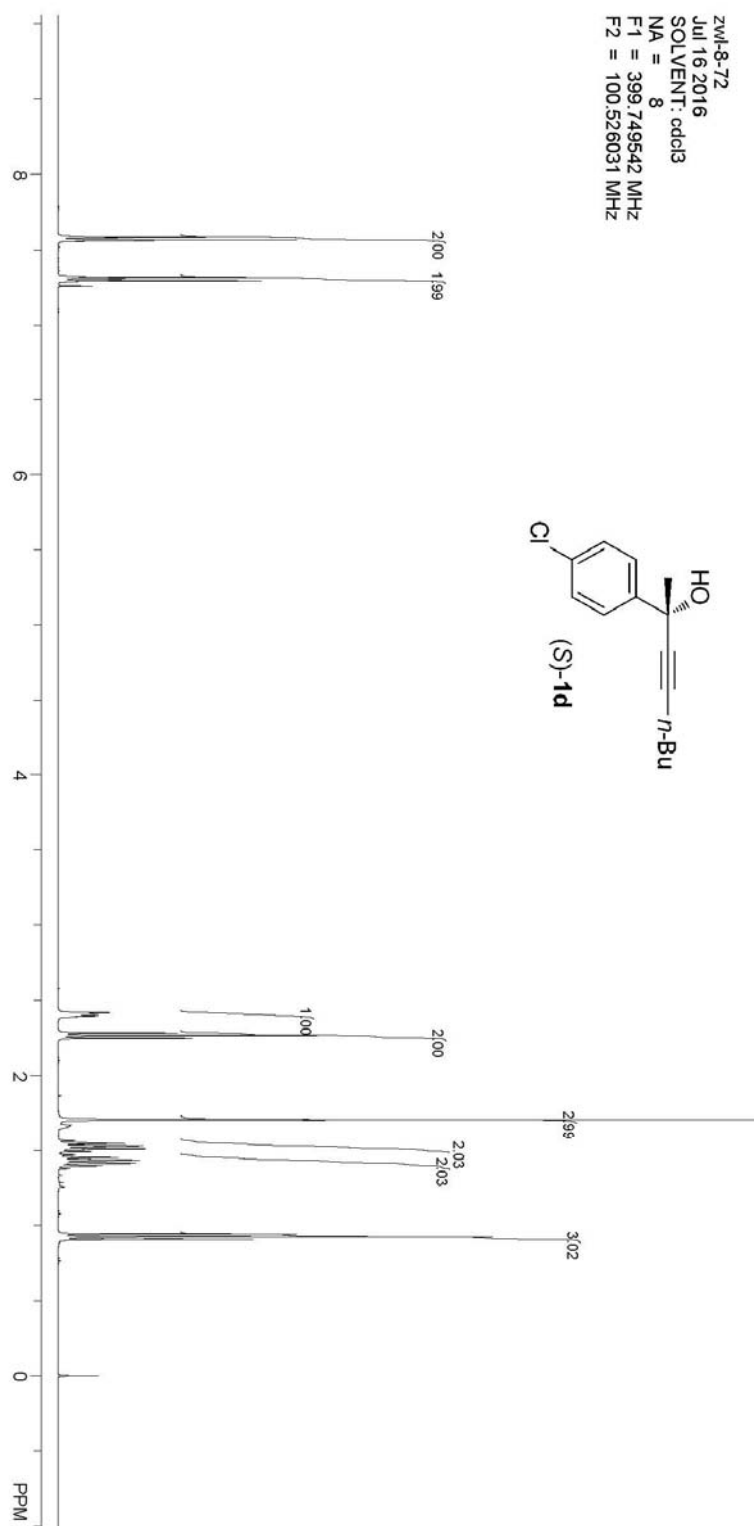

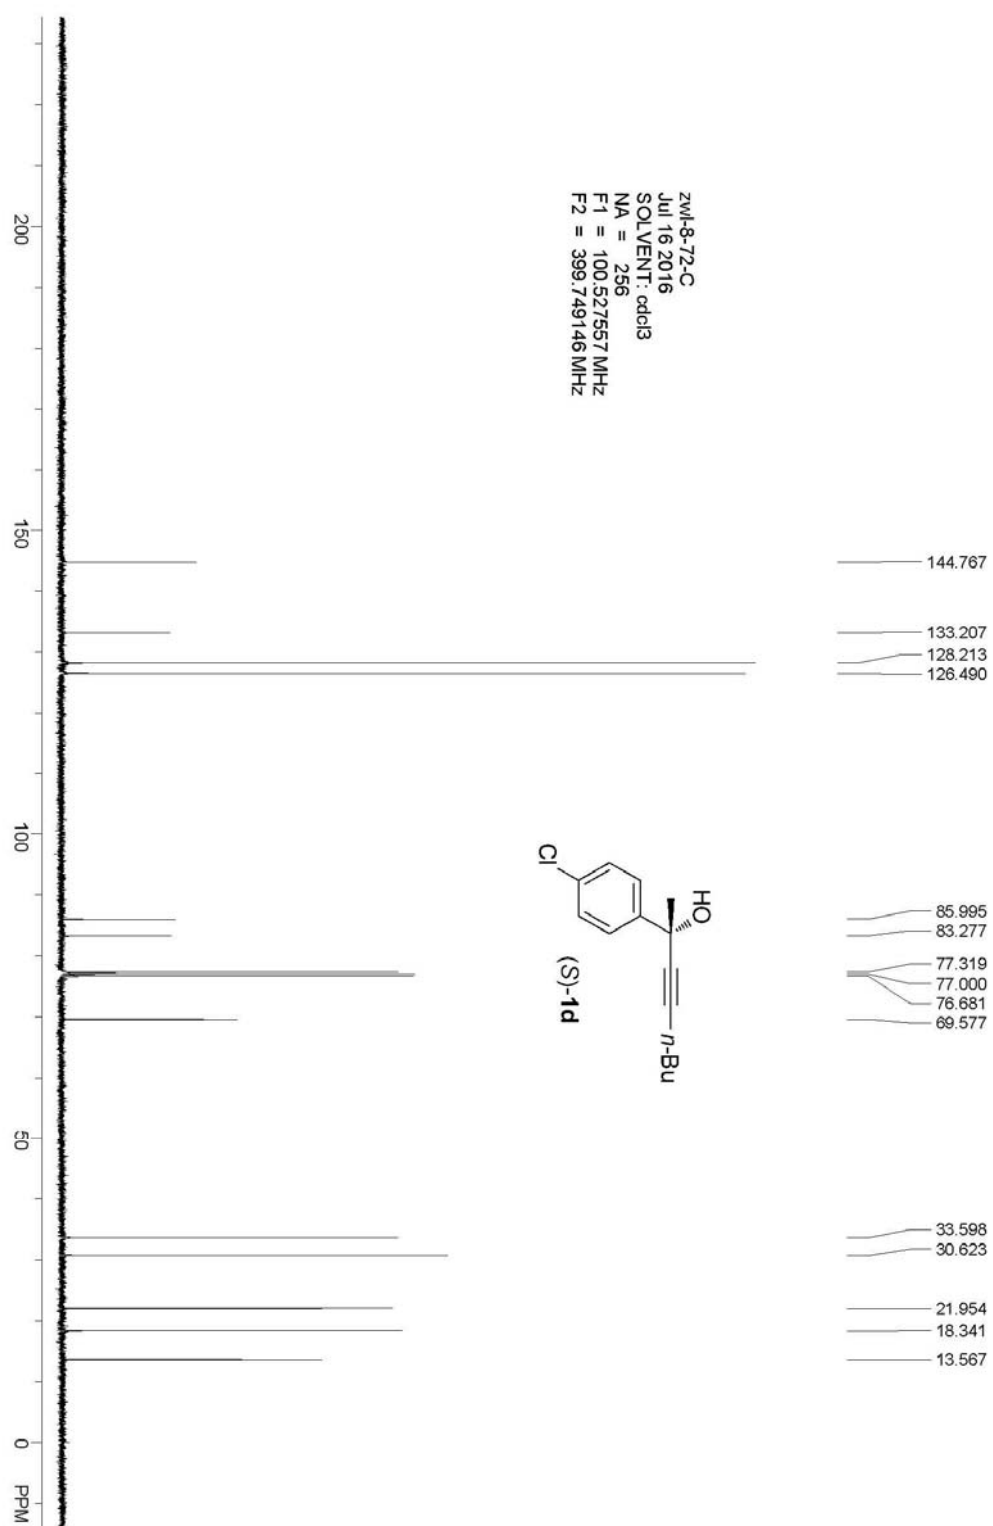

zw1-8-72-whelk-200-1-1-214

实验时间: 2016-04-05, 12:08:52 报告时间: 2016-04-05, 14:57:10  
谱图文件: D:\zhuguangji\zw1\20160405\zw1-8-72-whelk-200-1-1-214.org

实验内容简介:

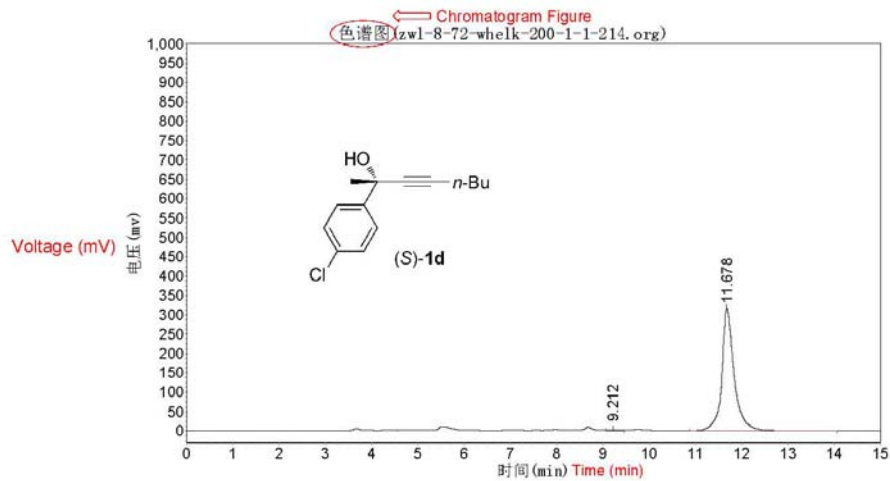

分析结果表

| 峰号(Peak No.) | 峰名(Peak name) | 保留时间(Retention time) | 峰高(Peak height) | 峰面积(Peak area) | 含量(Content) |
|--------------|---------------|----------------------|-----------------|----------------|-------------|
| 1            |               | 9.212                | 2170.168        | 32412.957      | 0.5475      |
| 2            |               | 11.678               | 317154.500      | 5888037.500    | 99.4525     |
| 总计           |               |                      | 319324.668      | 5920450.457    | 100.0000    |

# zw1-8-19-whelk-200-1-1-214

实验时间: 2016-04-05, 12:42:42 报告时间: 2016-04-05, 14:55:18  
 谱图文件: D:\zhuguangji\zw1\20160405\zw1-8-19-whelk-200-1-1-214.org

实验内容简介:

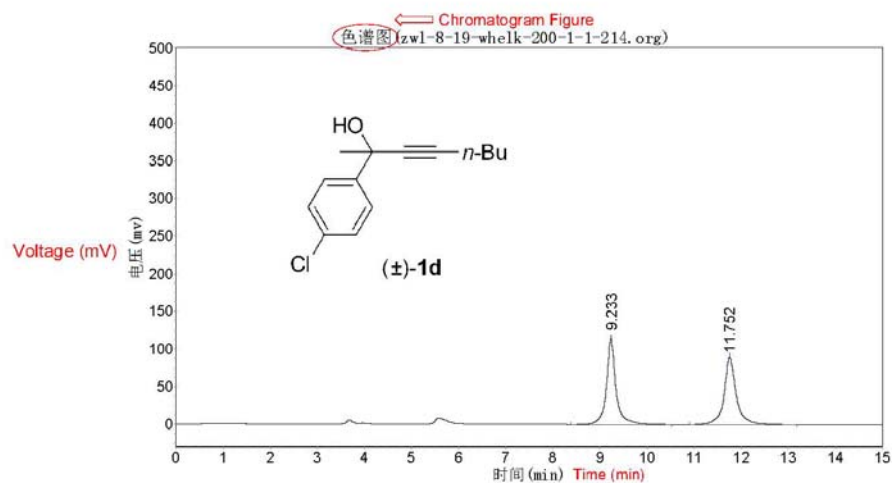

分析结果表

| 峰号(Peak No.) | 峰名(Peak name) | 保留时间(Retention time) | 峰高(Peak height) | 峰面积(Peak area) | 含量(Content) |
|--------------|---------------|----------------------|-----------------|----------------|-------------|
| 1            |               | 9.233                | 113819.242      | 1617175.125    | 50.1100     |
| 2            |               | 11.752               | 89607.492       | 1610075.500    | 49.8900     |
| 总计           |               |                      | 203426.734      | 3227250.625    | 100.0000    |

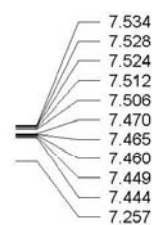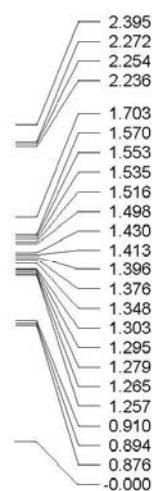

zwl-8-189-H  
Oct 9 2016  
SOLVENT: cdcl3  
NA = 8  
F1 = 399.749542 MHz  
F2 = 100.526031 MHz

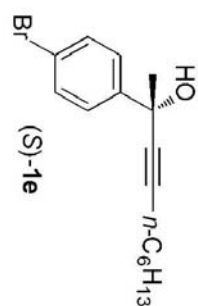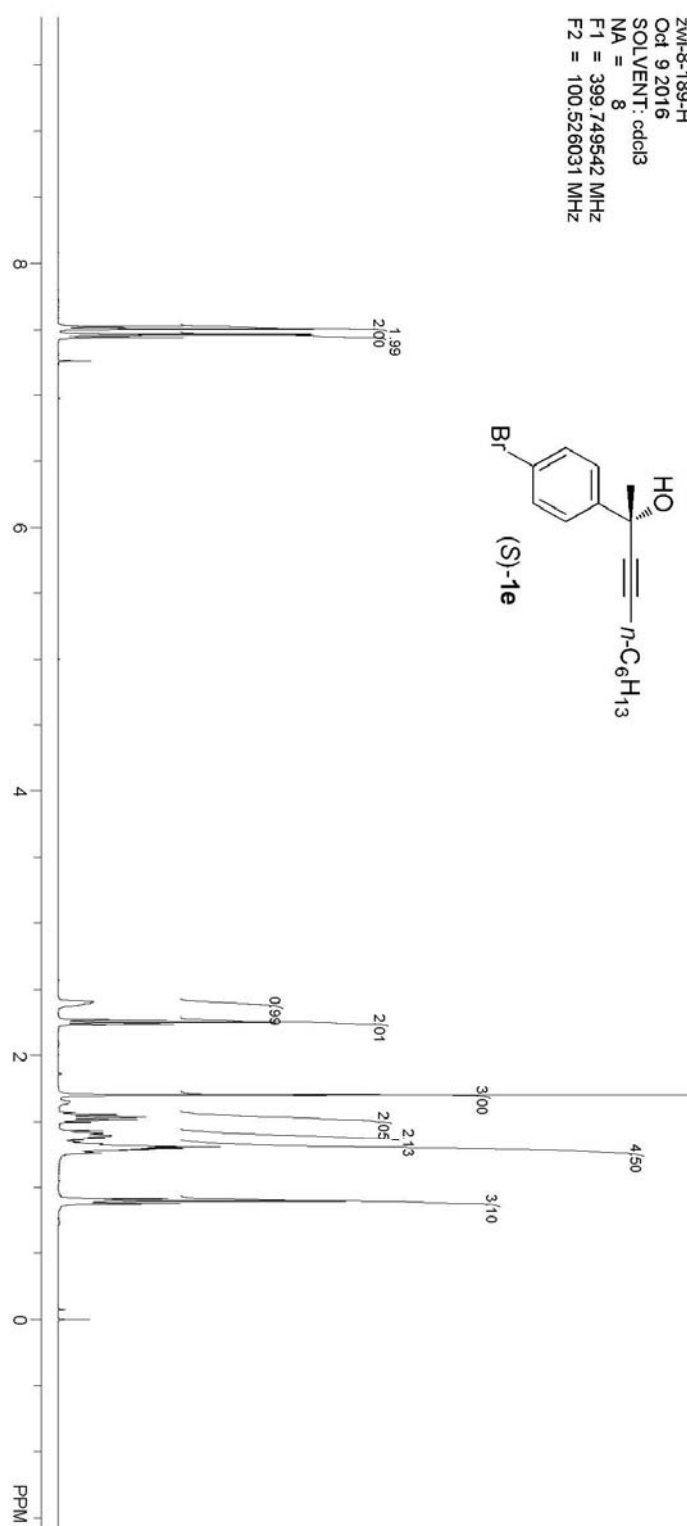

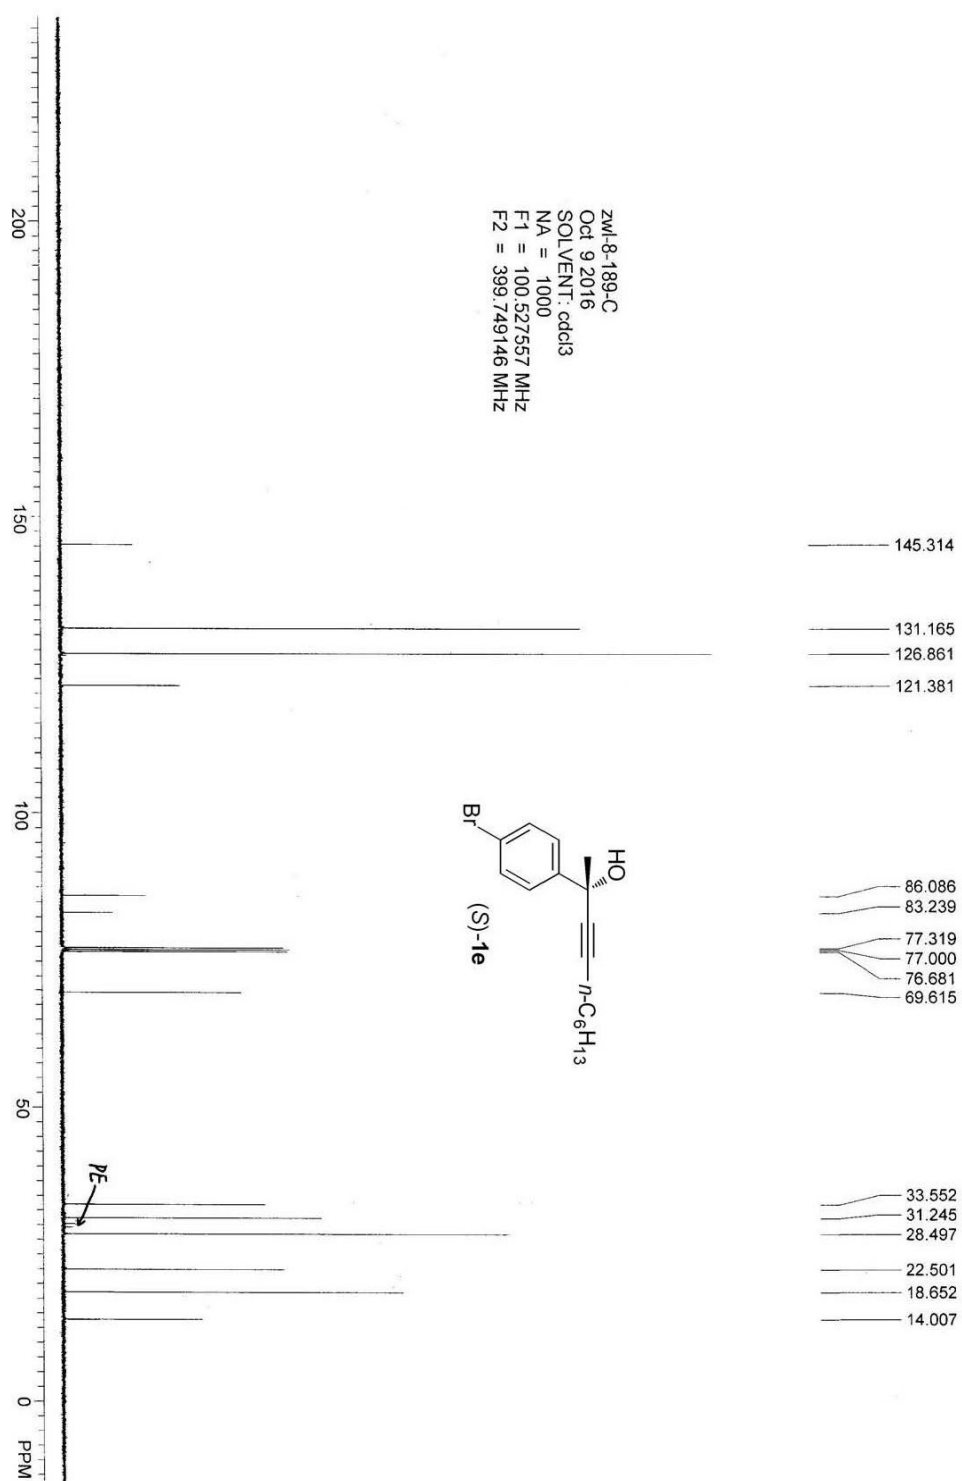

zwl-8-189-2-wheelk-200-1-1-214

实验时间: 2016-06-29, 15:02:56  
报告时间: 2016-06-29, 15:33:13  
谱图文件: D:\zhuguangji\zwl\20160628\zwl-8-189-2-wheelk-200-1-1-214..org

实验内容简介:

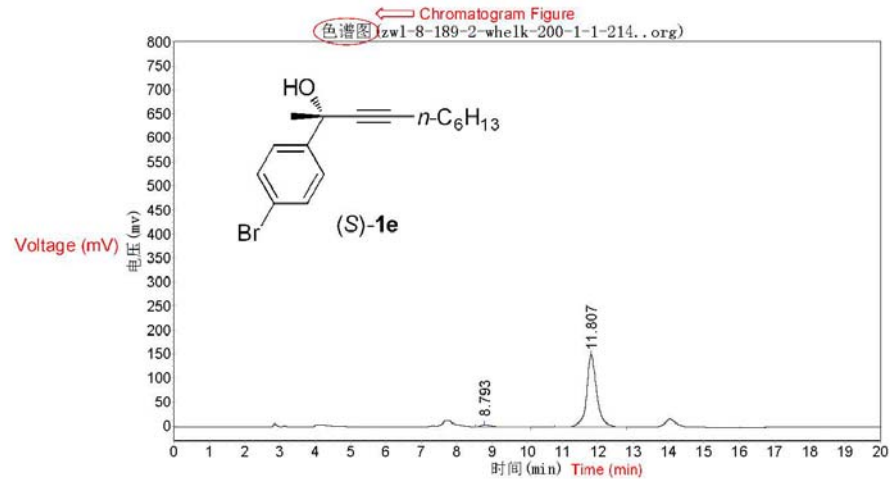

分析结果表

| 峰号 (Peak No.) | 峰名 (Peak name) | 保留时间 (Retention time) | 峰高 (Peak height) | 峰面积 (Peak area) | 含量 (Content) |
|---------------|----------------|-----------------------|------------------|-----------------|--------------|
| 1             |                | 8.793                 | 4195.861         | 115529.656      | 3.6861       |
| 2             |                | 11.807                | 150679.828       | 3018661.500     | 96.3139      |
| 总计            |                |                       | 154875.689       | 3134191.156     | 100.0000     |

zw1-8-179-whelk-200-1-1-214

实验时间: 2016-06-29, 14:36:15  
谱图文件: D:\zhuguangji\zw1\20160628\zw1-8-179-whelk-200-1-1-214..org

报告时间: 2016-06-29, 15:32:21

实验内容简介:

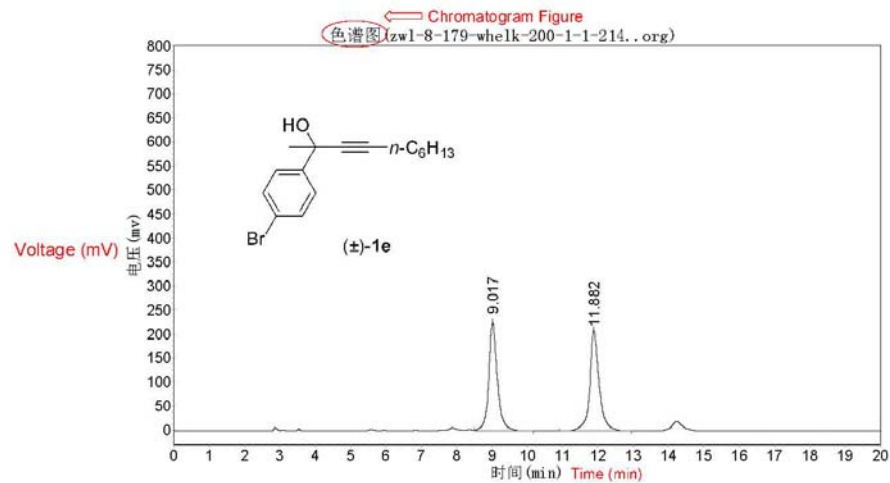

分析结果表

| 峰号 (Peak No.) | 峰名 (Peak name) | 保留时间 (Retention time) | 峰高 (Peak height) | 峰面积 (Peak area) | 含量 (Content) |
|---------------|----------------|-----------------------|------------------|-----------------|--------------|
| 1             |                | 9.017                 | 225030.719       | 3837817.500     | 49.6912      |
| 2             |                | 11.882                | 208576.016       | 3885510.250     | 50.3088      |
| 总计            |                |                       | 433606.734       | 7723327.750     | 100.0000     |

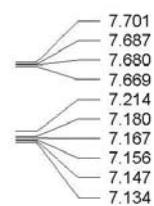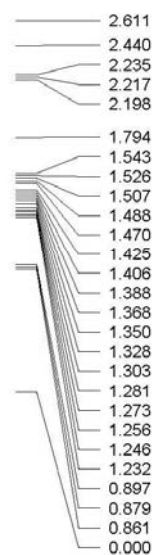

zwf-8-187-H  
Sep 30 2016  
SOLVENT: cdcl3  
NA = 8  
F1 = 399.749542 MHz  
F2 = 100.526031 MHz

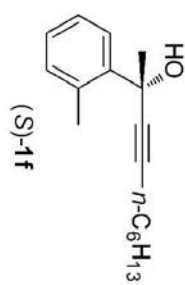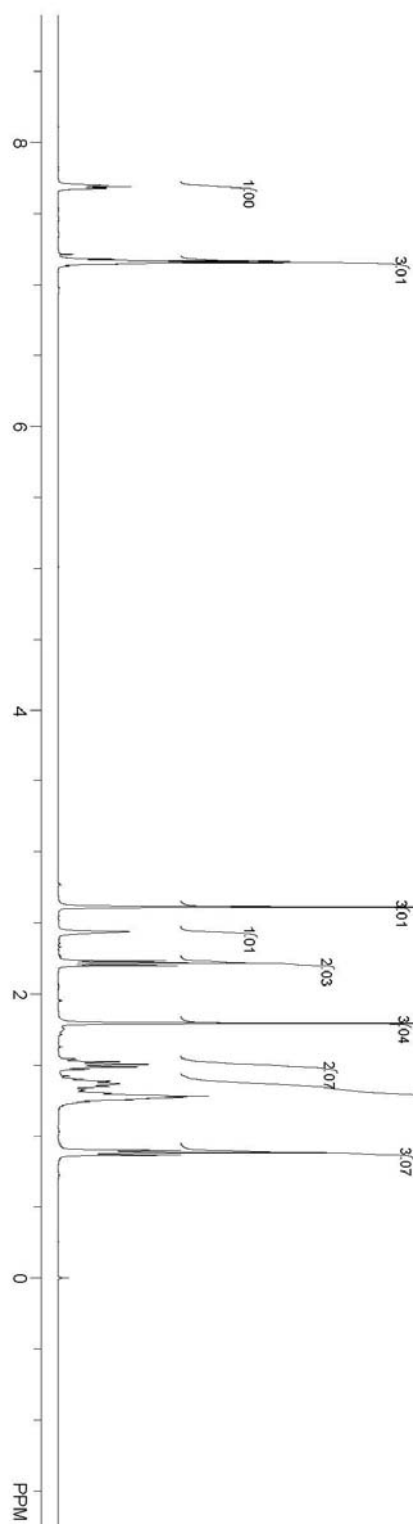

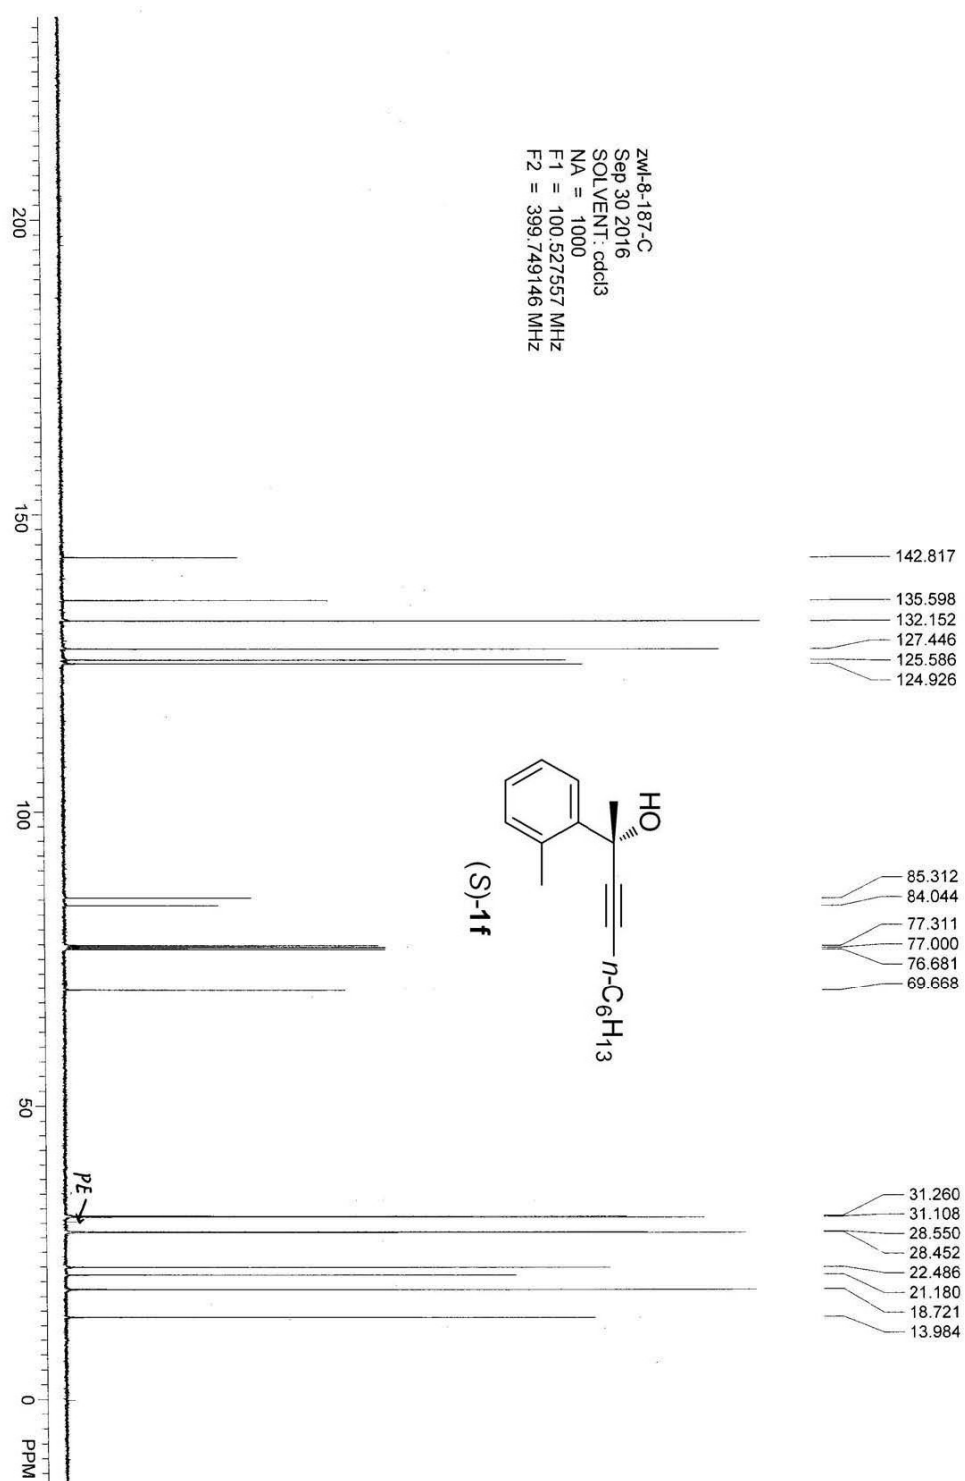

## zw1-8-187-2-oj-h-200-1-1-214

实验时间: 2016-06-29, 17:23:58 报告时间: 2016-06-29, 17:45:23  
谱图文件: D:\zhuguangjiang\zw1\20160628\zw1-8-187-2-oj-h-200-1-1-214..org

实验内容简介:

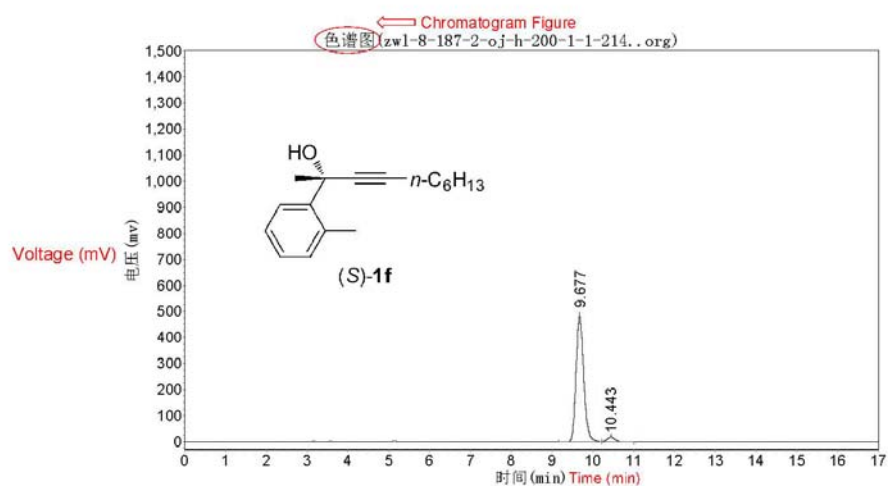

分析结果表

| 峰号 (Peak No.) | 峰名 (Peak name) | 保留时间 (Retention time) | 峰高 (Peak height) | 峰面积 (Peak area) | 含量 (Content) |
|---------------|----------------|-----------------------|------------------|-----------------|--------------|
| 1             |                | 9.677                 | 482537.094       | 6328731.000     | 95.5790      |
| 2             |                | 10.443                | 18904.176        | 292732.063      | 4.4210       |
| 总计            |                |                       | 501441.270       | 6621463.063     | 100.0000     |

# zw1-8-177-oj-h-200-1-1-214

实验时间: 2016-06-29, 16:56:01 报告时间: 2016-06-29, 17:26:43  
谱图文件: D:\zhuguangji\zw1\20160628\zw1-8-177-oj-h-200-1-1-214.org

实验内容简介:

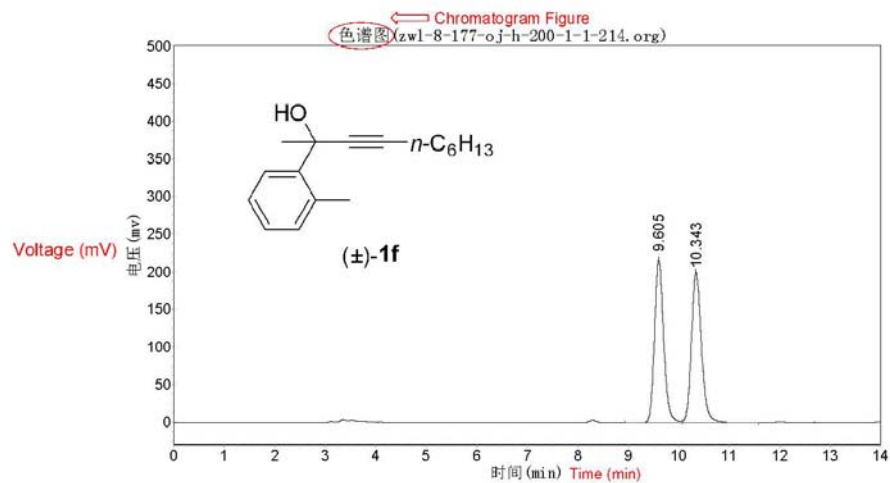

分析结果表

| 峰号(Peak No.) | 峰名(Peak name) | 保留时间(Retention time) | 峰高(Peak height) | 峰面积(Peak area) | 含量(Content) |
|--------------|---------------|----------------------|-----------------|----------------|-------------|
| 1            |               | 9.605                | 216347.641      | 2735003.000    | 49.7589     |
| 2            |               | 10.343               | 200223.797      | 2761504.250    | 50.2411     |
| 总计           |               |                      | 416571.438      | 5496507.250    | 100.0000    |

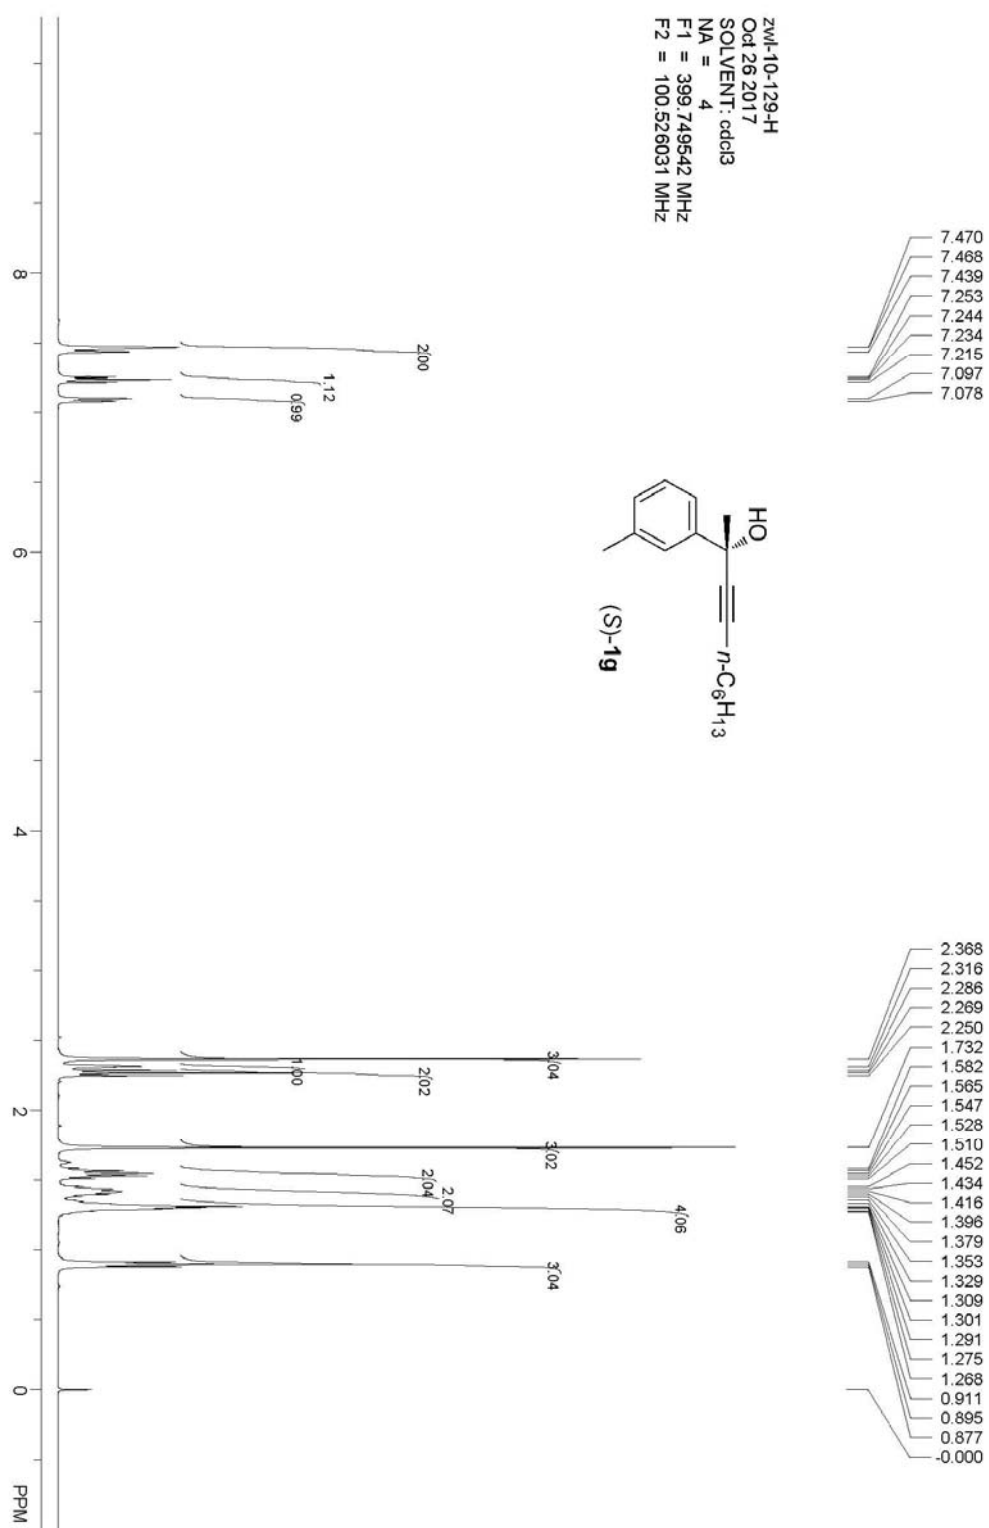

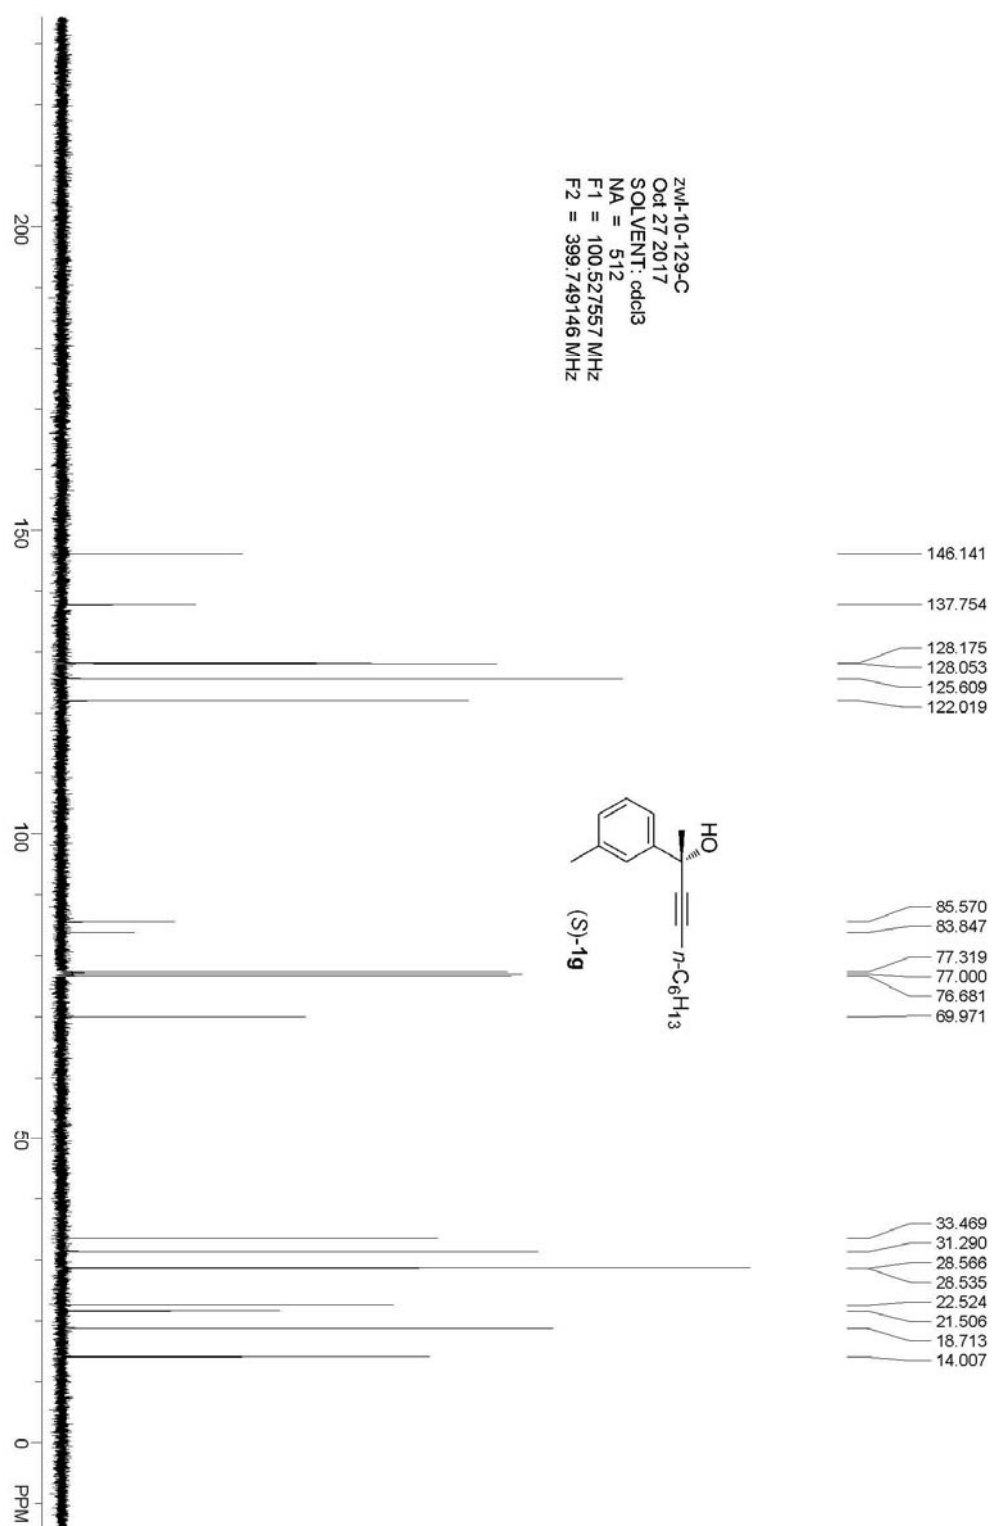

# zw1-10-129

实验时间: 2017-10-25, 21:24:18 报告时间: 2017-10-25, 21:38:47  
 谱图文件: E:\data\zw1\zw1-10-129-whelk-s, s-200-1-1-214. org  
 方法文件: E:\data\zw1\zw1. mtd

Brief introduction of experimental conditions  
 实验内容简介:  
 zw1-10-129-whelk-s, s-200-1-1-214

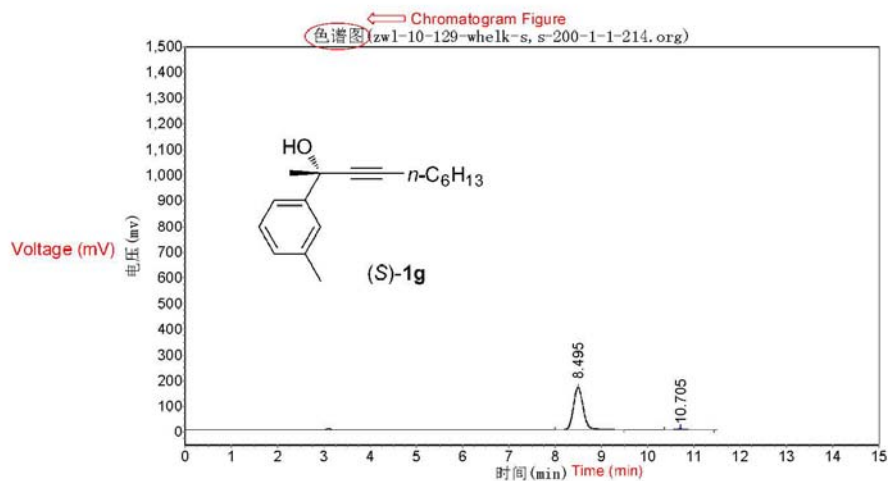

分析结果表

| 峰号 (Peak No.) | 峰名 (Peak name) | 保留时间 (Retention time) | 峰高 (Peak height) | 峰面积 (Peak area) | 含量 (Content) |
|---------------|----------------|-----------------------|------------------|-----------------|--------------|
| 1             |                | 8.495                 | 164122.281       | 2422488.750     | 97.3211      |
| 2             |                | 10.705                | 3391.566         | 66683.594       | 2.6789       |
| 总计            |                |                       | 167513.847       | 2489172.344     | 100.0000     |

## zw1-10-61

实验时间: 2017-10-25, 21:10:46  
谱图文件: E:\data\zw1\zw1-10-61-whelk-s, s-200-1-1-214-  
17.10.25.org  
方法文件: E:\data\zw1\zw1.mtd

报告时间: 2017-10-25, 21:25:20

实验内容简介: Brief introduction of experimental conditions

zw1-10-61-whelk-s, s-200-1-1-214

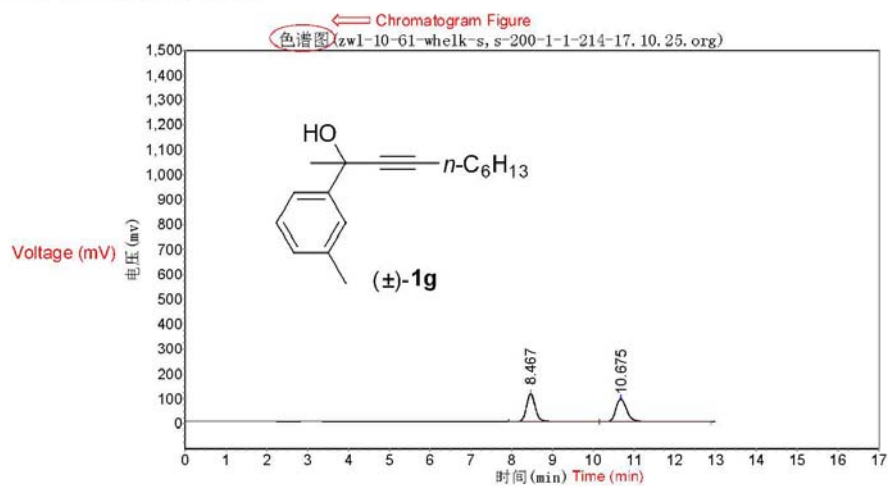

分析结果表

| 峰号 (Peak No.) | 峰名 (Peak name) | 保留时间 (Retention time) | 峰高 (Peak height) | 峰面积 (Peak area) | 含量 (Content) |
|---------------|----------------|-----------------------|------------------|-----------------|--------------|
| 1             |                | 8.467                 | 110892.078       | 1724765.625     | 50.0332      |
| 2             |                | 10.675                | 91118.008        | 1722478.000     | 49.9668      |
| 总计            |                |                       | 202010.086       | 3447243.625     | 100.0000     |

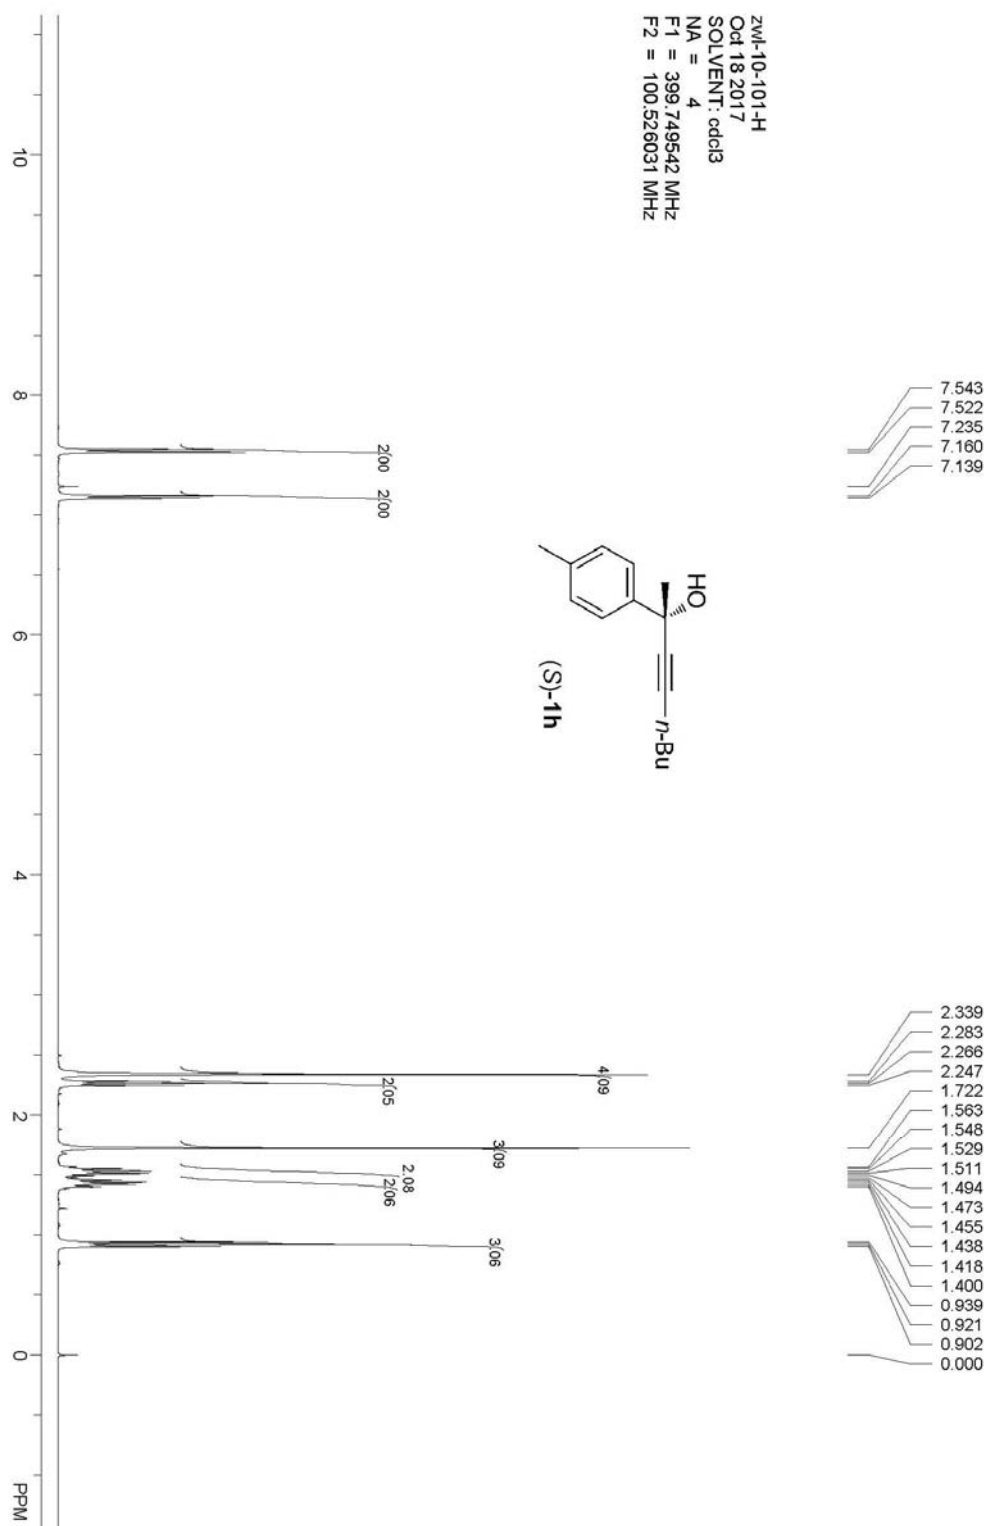

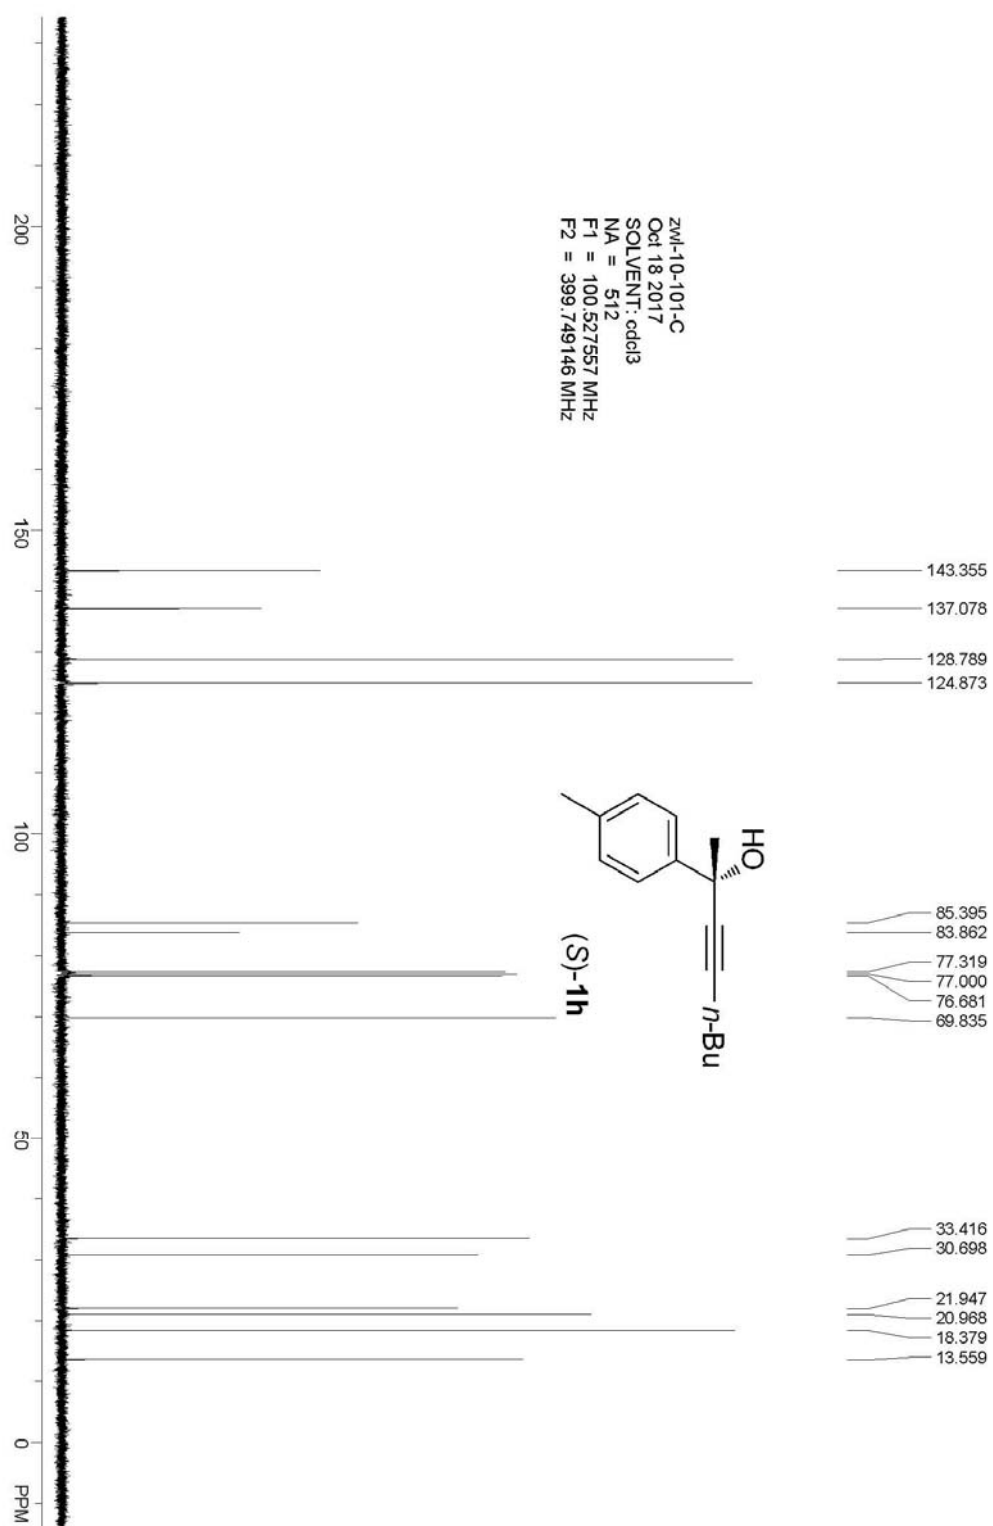

## zw1-10-101

实验时间: 2017-10-14, 10:12:49

报告时间: 2017-10-17, 14:08:31

谱图文件: E:\data\zw1\zw1-10-101-whelk-s, s-200-1-1-214. org

方法文件: E:\data\zw1\zw1.mtd

Brief introduction of experimental conditions

实验内容简介:

zw1-10-101-whelk-s, s-200-1-1-214

Chromatogram Figure

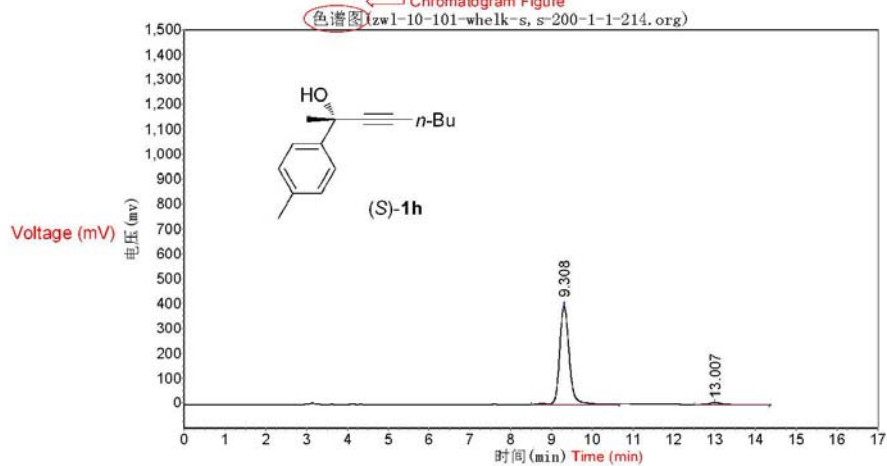

分析结果表

| 峰号 (Peak No.) | 峰名 (Peak name) | 保留时间 (Retention time) | 峰高 (Peak height) | 峰面积 (Peak area) | 含量 (Content) |
|---------------|----------------|-----------------------|------------------|-----------------|--------------|
| 1             |                | 9.308                 | 395926.438       | 6607310.000     | 97.1977      |
| 2             |                | 13.007                | 7925.763         | 190493.828      | 2.8023       |
| 总计            |                |                       | 403852.200       | 6797803.828     | 100.0000     |

## zw1-8-20

实验时间: 2017-10-14, 9:54:41  
 谱图文件: E:\data\zw1\zw1-8-20-whelk-s, s-200-1-1-214-  
 17.10.14.org  
 方法文件: E:\data\zw1\zw1.mtd

报告时间: 2017-10-14, 10:14:18

实验内容简介: Brief introduction of experimental conditions

zw1-8-20-whelk-s, s-200-1-1-214

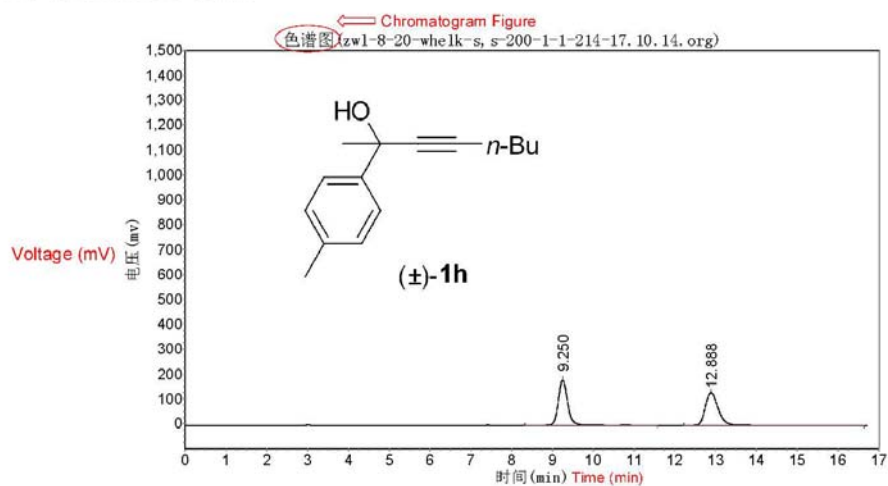

分析结果表

| 峰号 (Peak No.) | 峰名 (Peak name) | 保留时间 (Retention time) | 峰高 (Peak height) | 峰面积 (Peak area) | 含量 (Content) |
|---------------|----------------|-----------------------|------------------|-----------------|--------------|
| 1             |                | 9.250                 | 182265.719       | 3016561.000     | 50.0861      |
| 2             |                | 12.888                | 130924.500       | 3006188.000     | 49.9139      |
| 总计            |                |                       | 313190.219       | 6022749.000     | 100.0000     |

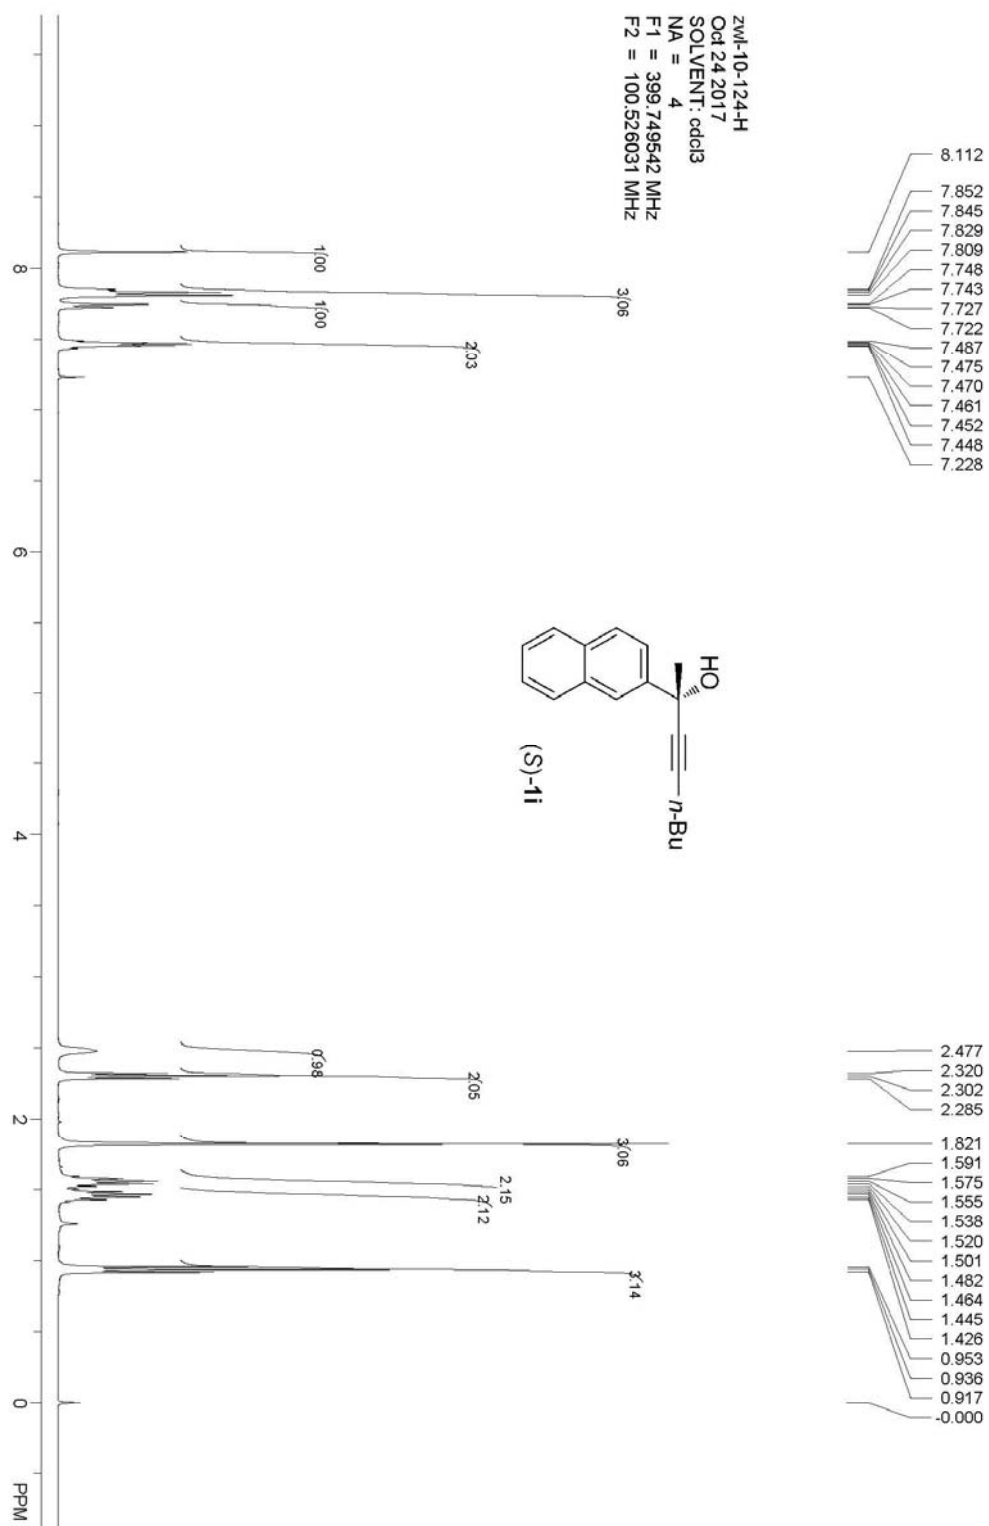

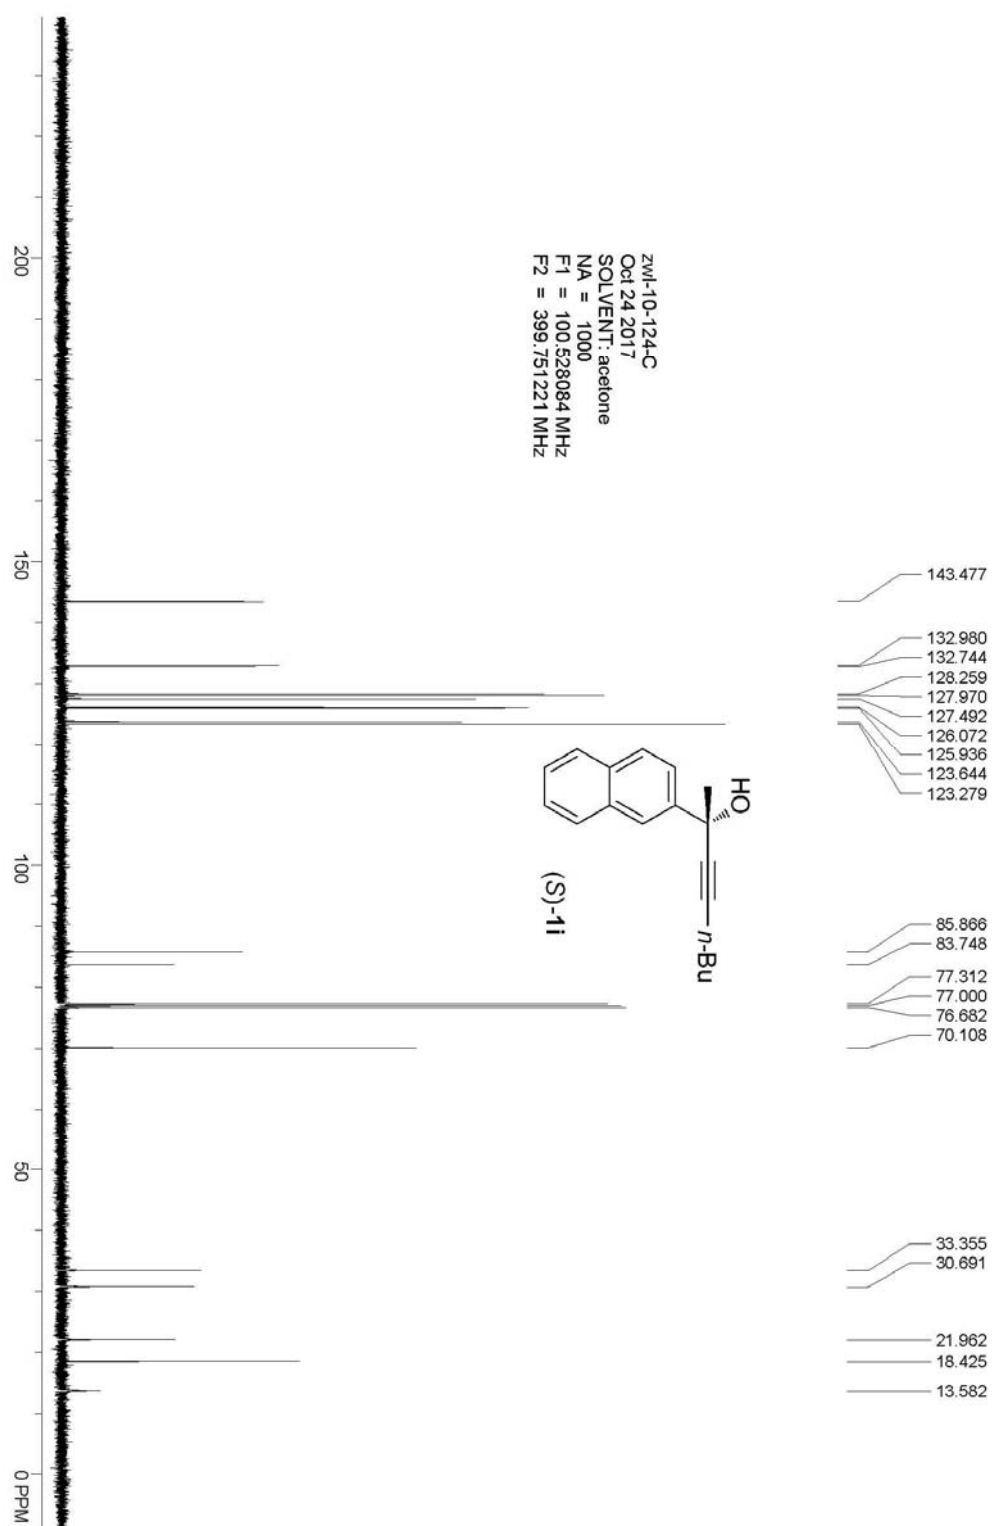

## zw1-10-124

实验时间: 2017-10-23, 20:37:26  
谱图文件: E:\data\zw1\zw1-10-124-whelk-s, s-200-1-1-214. org  
方法文件: E:\data\zw1\zw1. mtd

报告时间: 2017-10-23, 21:20:54

实验内容简介:  
zw1-10-124

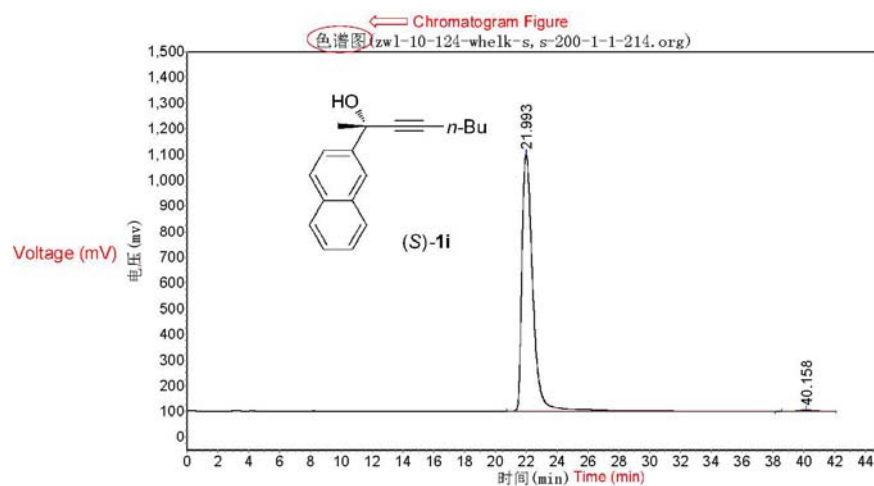

分析结果表

| 峰号 (Peak No.) | 峰名 (Peak name) | 保留时间 (Retention time) | 峰高 (Peak height) | 峰面积 (Peak area) | 含量 (Content) |
|---------------|----------------|-----------------------|------------------|-----------------|--------------|
| 1             |                | 21.993                | 1001682.188      | 50106052.000    | 99.1194      |
| 2             |                | 40.158                | 6194.592         | 445155.594      | 0.8806       |
| 总计            |                |                       | 1007876.779      | 50551207.594    | 100.0000     |

## zw1-8-41

实验时间: 2017-10-23, 19:24:28  
 谱图文件: E:\data\zw1\zw1-8-41-whelk-s, s-200-1-1-214-  
 17.10.23.org  
 方法文件: E:\data\zw1\zw1.mtd

报告时间: 2017-10-23, 20:39:15

实验内容简介: Brief introduction of experimental conditions

zw1-8-41-whelk-s, s-200-1-1-214

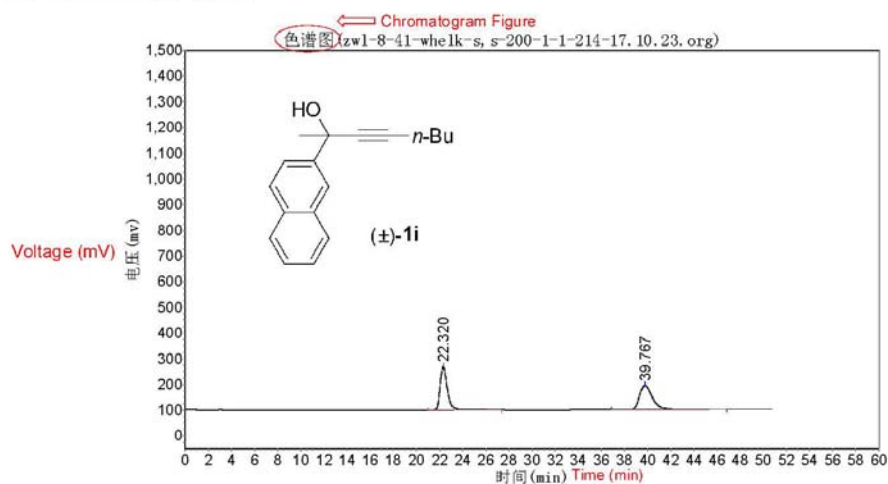

分析结果表

| 峰号 (Peak No.) | 峰名 (Peak name) | 保留时间 (Retention time) | 峰高 (Peak height) | 峰面积 (Peak area) | 含量 (Content) |
|---------------|----------------|-----------------------|------------------|-----------------|--------------|
| 1             |                | 22.320                | 167572.578       | 7365807.000     | 49.8083      |
| 2             |                | 39.767                | 93770.930        | 7422519.500     | 50.1917      |
| 总计            |                |                       | 261343.508       | 14788326.500    | 100.0000     |

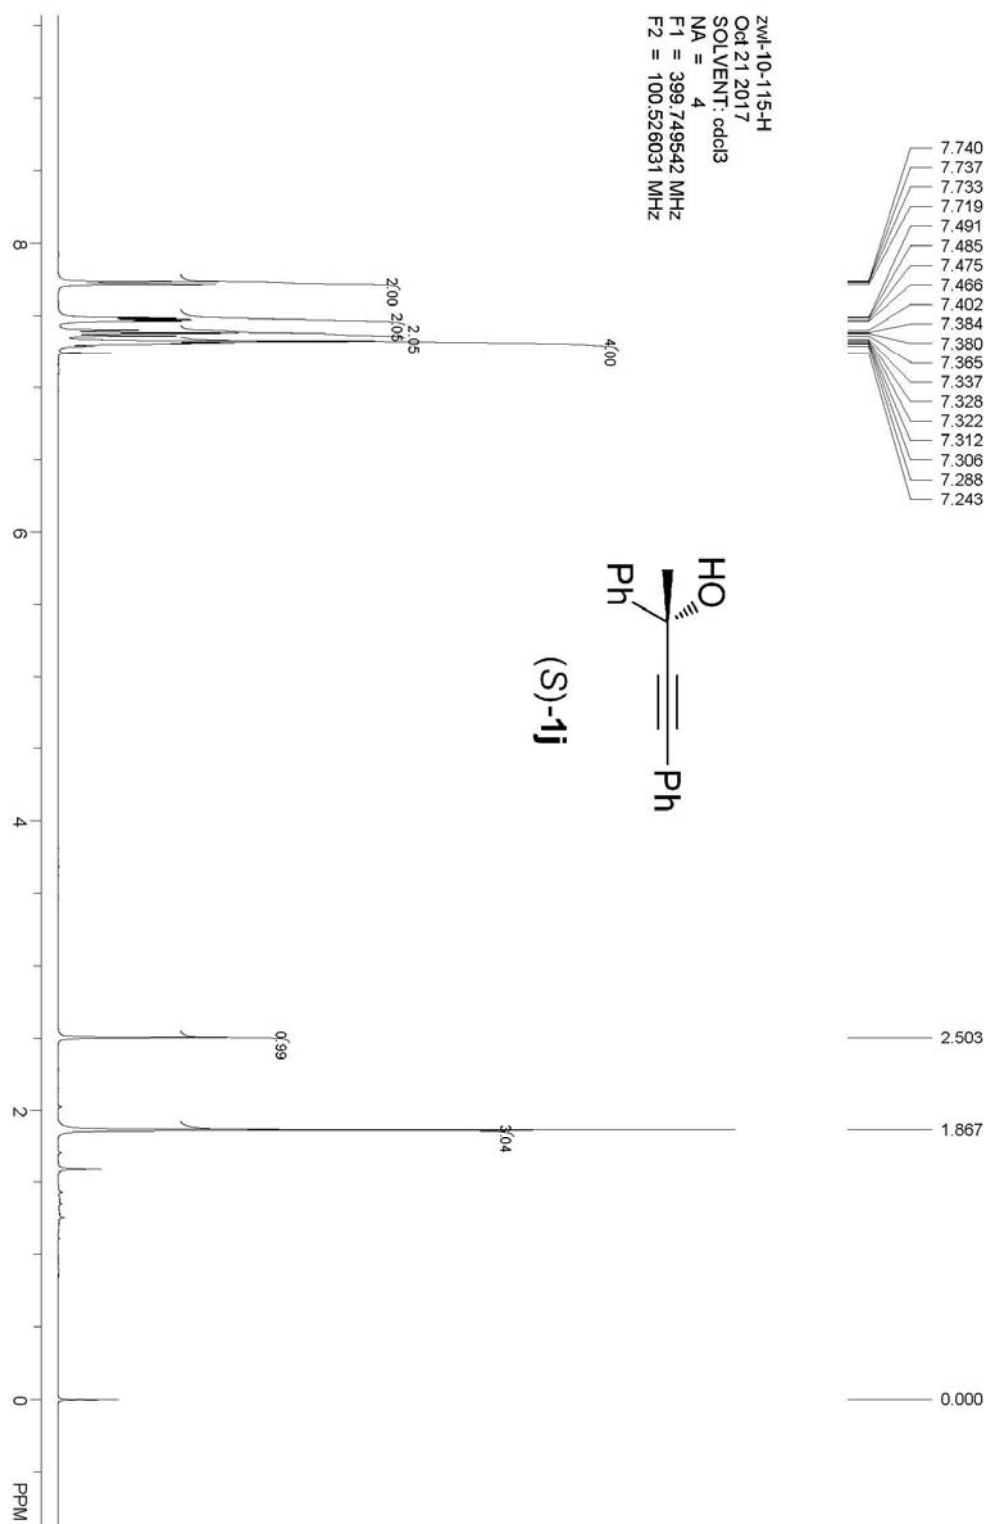

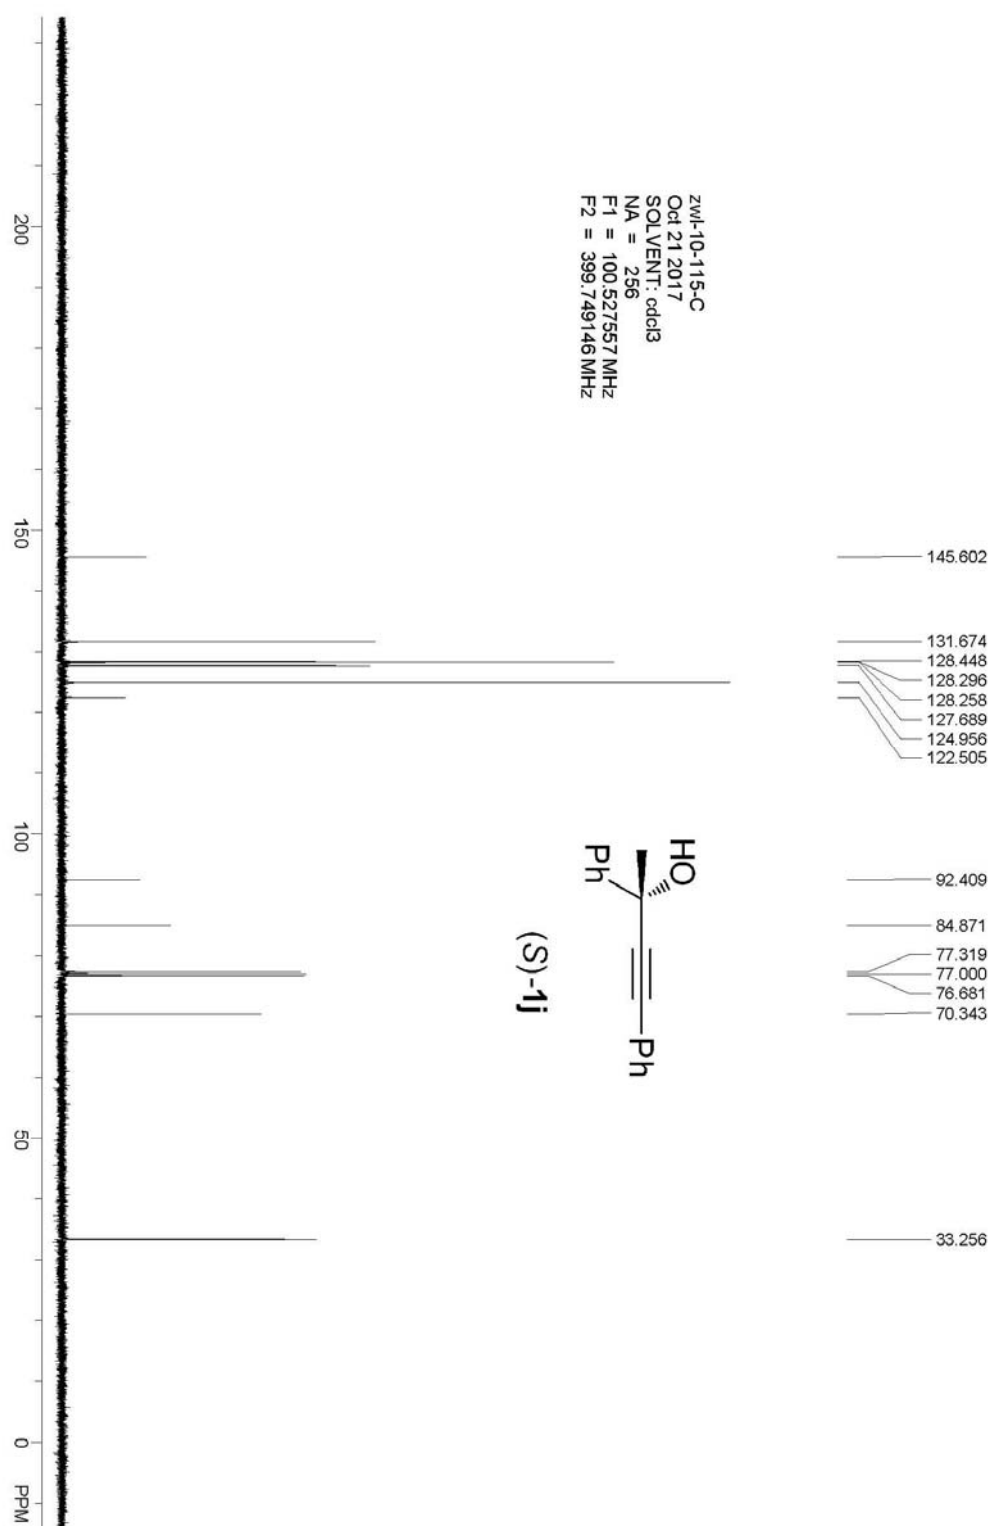

## zwl-10-115

实验时间: 2017-10-18, 19:19:10

报告时间: 2017-10-18, 19:50:52

谱图文件: E:\data\zwl\zwl-10-115-wheelk-s, s-200-1-1-214. org

方法文件: E:\data\zwl\zwl. mtd

← Brief introduction of experimental conditions

实验内容简介:

zwl-10-115-wheelk-s, s-200-1-1-214

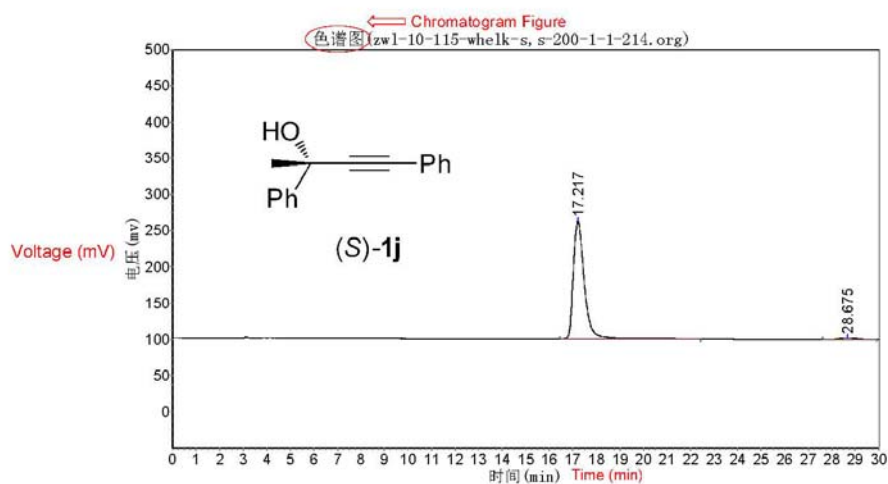

分析结果表

| 峰号 (Peak No.) | 峰名 (Peak name) | 保留时间 (Retention time) | 峰高 (Peak height) | 峰面积 (Peak area) | 含量 (Content) |
|---------------|----------------|-----------------------|------------------|-----------------|--------------|
| 1             |                | 17.217                | 162836.984       | 5330285.000     | 98.2242      |
| 2             |                | 28.675                | 1968.247         | 96368.727       | 1.7758       |
| 总计            |                |                       | 164805.231       | 5426653.727     | 100.0000     |

## zw1-7-28

实验时间: 2017-10-18, 18:17:25  
 谱图文件: E:\data\zw1\zw1-7-28-whelk-s, s-200-1-1-214-  
 17.10.18.org  
 方法文件: E:\data\zw1\zw1.mtd

报告时间: 2017-10-18, 18:49:50

实验内容简介: Brief introduction of experimental conditions

zw1-7-28-whelk-s, s-200-1-1-214

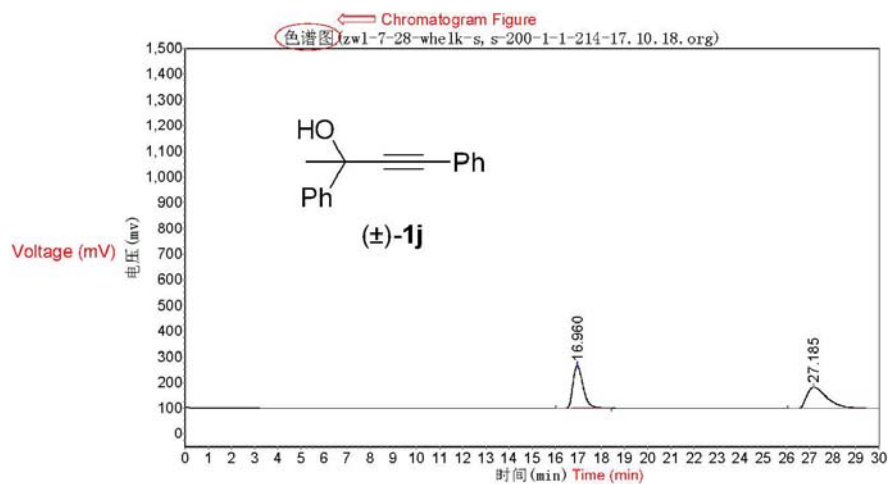

分析结果表

| 峰号 (Peak No.) | 峰名 (Peak name) | 保留时间 (Retention time) | 峰高 (Peak height) | 峰面积 (Peak area) | 含量 (Content) |
|---------------|----------------|-----------------------|------------------|-----------------|--------------|
| 1             |                | 16.960                | 166608.766       | 5118363.500     | 49.7273      |
| 2             |                | 27.185                | 84653.508        | 5174505.000     | 50.2727      |
| 总计            |                |                       | 251262.273       | 10292868.500    | 100.0000     |

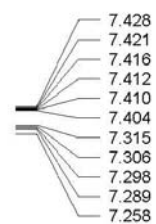

zw/-10-118-H  
Oct 22 2017  
SOLVENT: cdcl3  
NA = 8  
F1 = 399.749542 MHz  
F2 = 100.526031 MHz

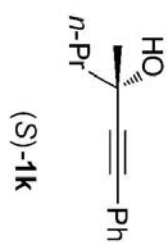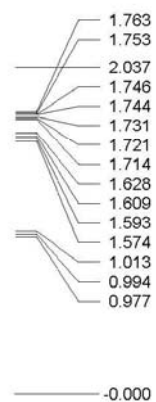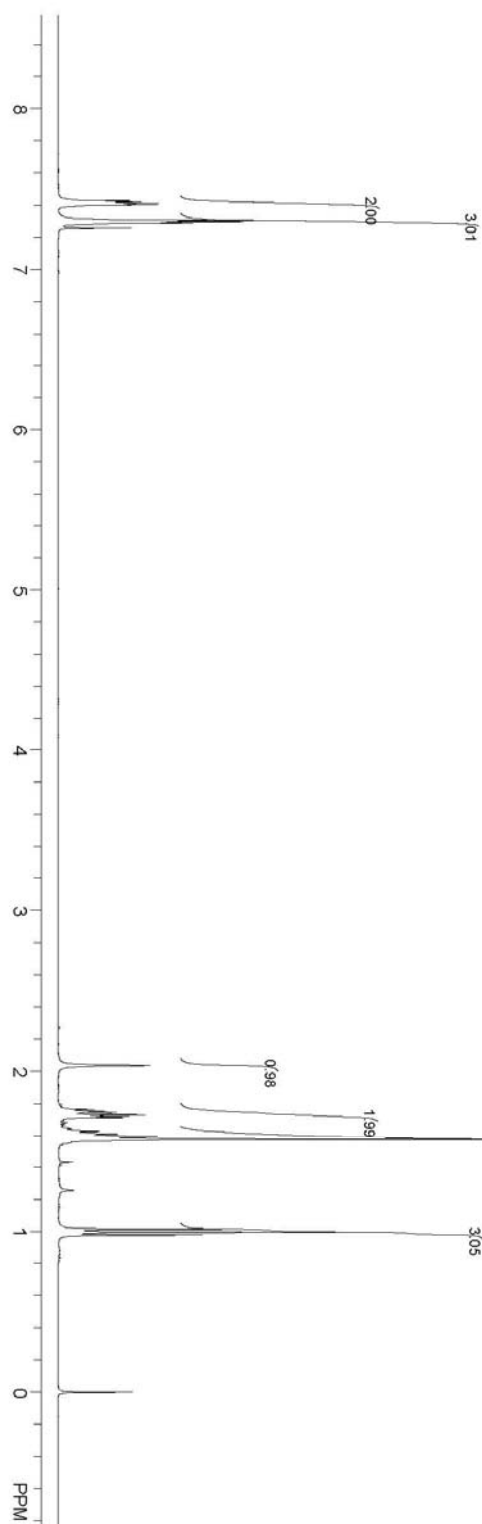

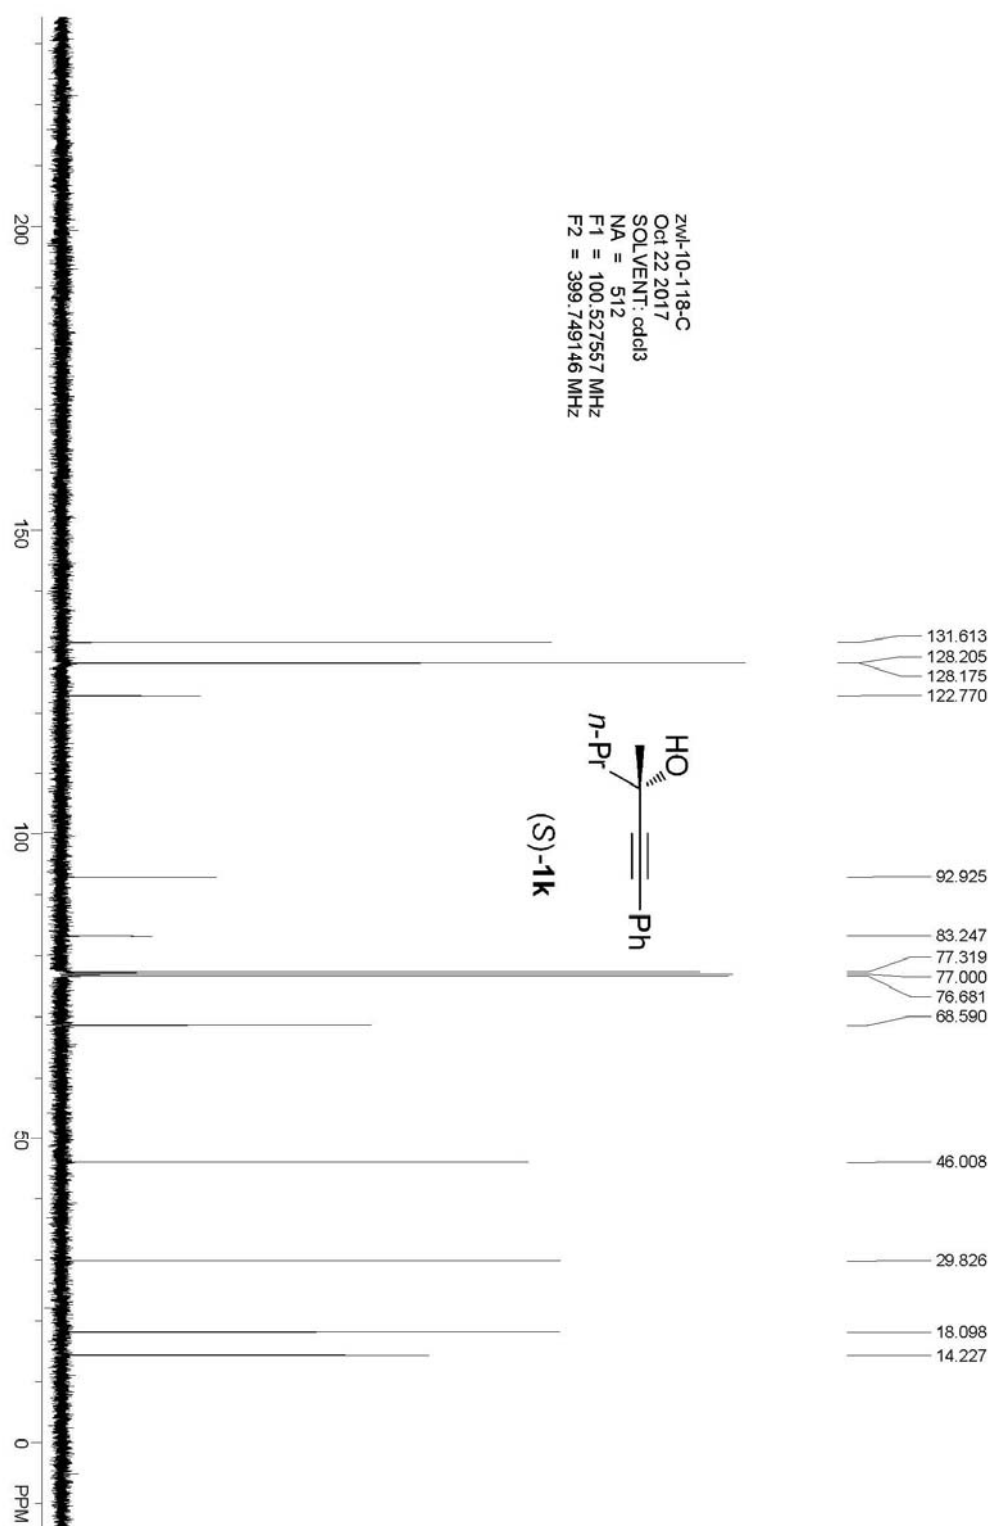

## zw1-10-118

实验时间: 2017-10-21, 10:13:16

报告时间: 2017-10-21, 10:23:23

谱图文件: E:\data\zw1\zw1-10-118-ad-h-95-5-1-214.org

方法文件: E:\data\zw1\zw1.mtd

← Brief introduction of experimental conditions

实验内容简介:

zw1-10-118-ad-h-95-5-1-214

← Chromatogram Figure

(色谱图) (zw1-10-118-ad-h-95-5-1-214.org)

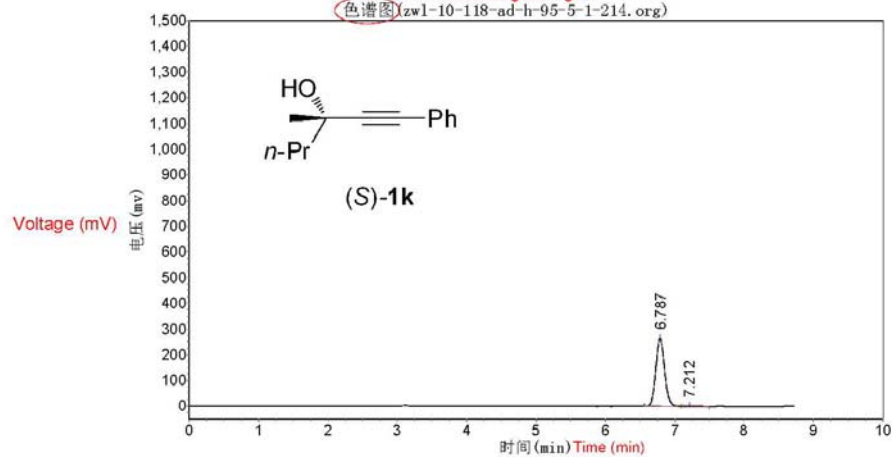

分析结果表

| 峰号(Peak No.) | 峰名(Peak name) | 保留时间(Retention time) | 峰高(Peak height) | 峰面积(Peak area) | 含量(Content) |
|--------------|---------------|----------------------|-----------------|----------------|-------------|
| 1            |               | 6.787                | 263738.281      | 2291700.609    | 99.1329     |
| 2            |               | 7.212                | 1161.604        | 20045.147      | 0.8671      |
| 总计           |               |                      | 264899.886      | 2311745.756    | 100.0000    |

hcf-1-4

实验时间: 2017-10-21, 9:52:30

报告时间: 2017-10-21, 10:13:52

谱图文件: E:\data\zw1\hcf-1-4-ad-h-95-5-1-214-17. 10. 21. org

方法文件: E:\data\zw1\zw1.mtd

Brief introduction of experimental conditions

实验内容简介

hcf-1-4-ad-h-95-5-1-214

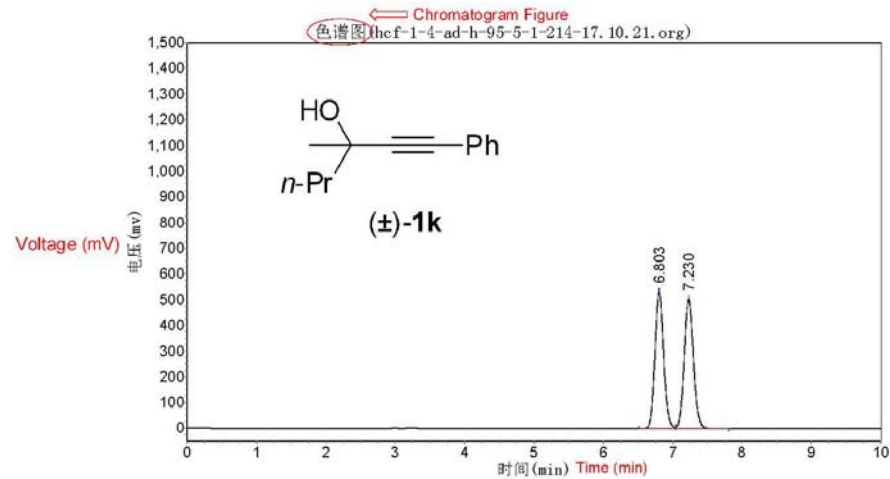

分析结果表

| 峰号 (Peak No.) | 峰名 (Peak name) | 保留时间 (Retention time) | 峰高 (Peak height) | 峰面积 (Peak area) | 含量 (Content) |
|---------------|----------------|-----------------------|------------------|-----------------|--------------|
| 1             |                | 6.803                 | 530138.438       | 4628235.000     | 49.9353      |
| 2             |                | 7.230                 | 503045.531       | 4640231.000     | 50.0647      |
| 总计            |                |                       | 1033183.969      | 9268466.000     | 100.0000     |

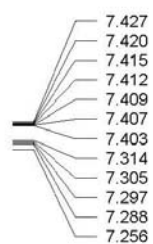

zwf-10-116-H  
Oct 22 2017  
SOLVENT: cdcl3  
NA = 8  
F1 = 399.749542 MHz  
F2 = 100.526031 MHz

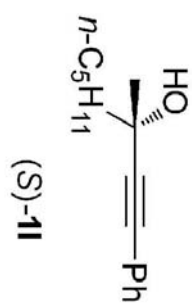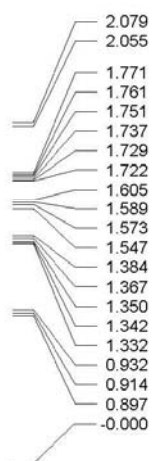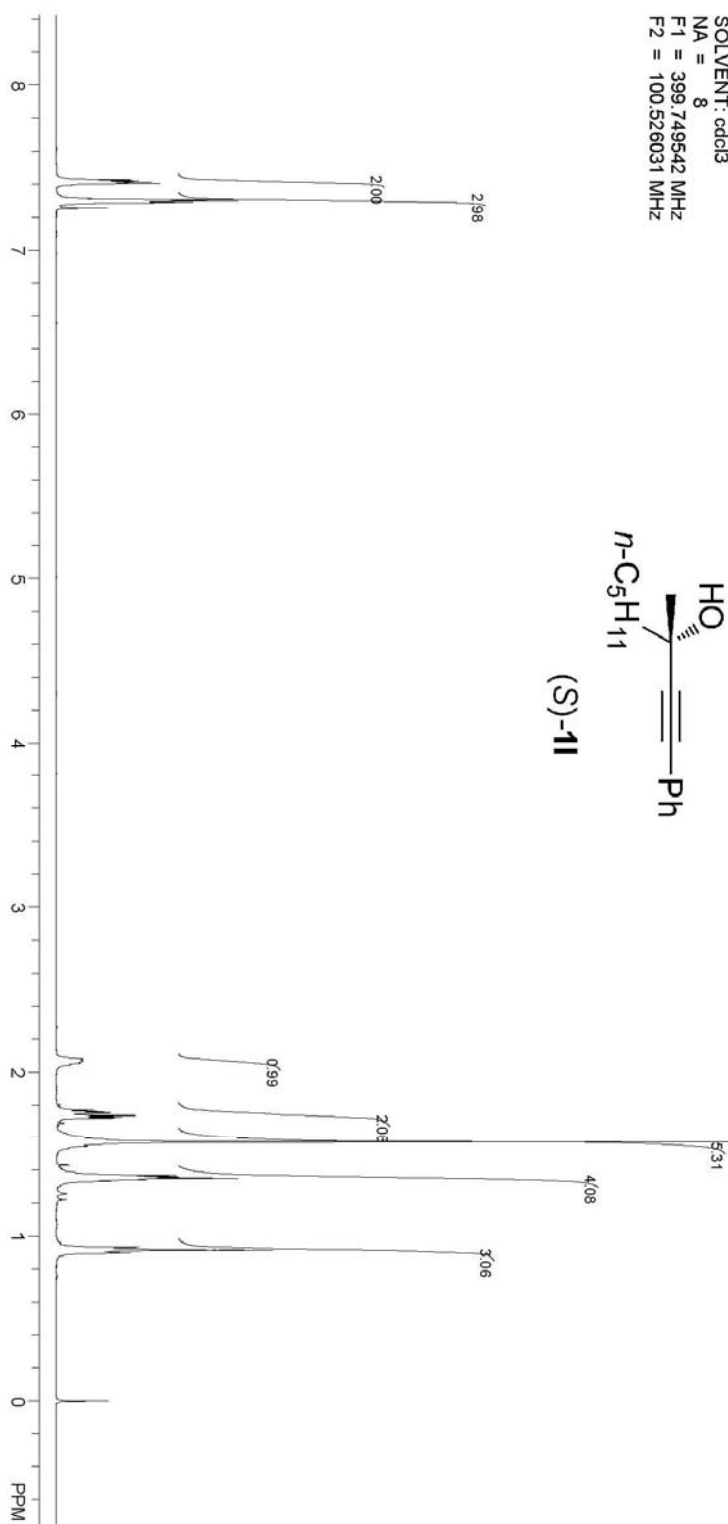

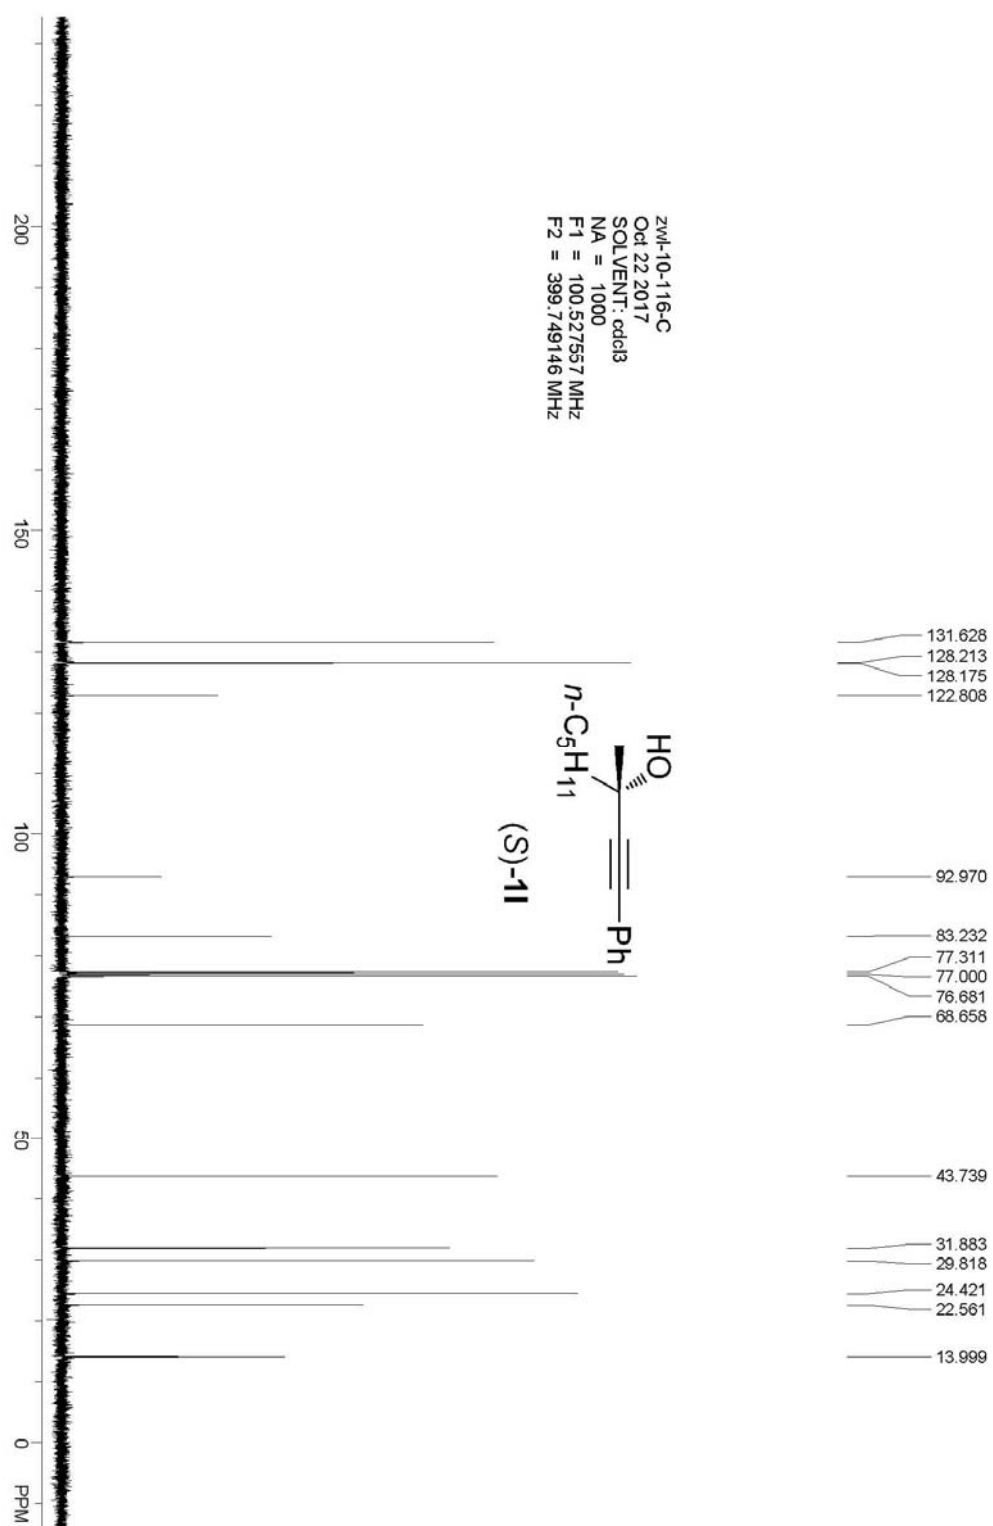

## zw1-10-116

实验时间: 2017-10-18, 20:22:30

报告时间: 2017-10-18, 20:56:37

谱图文件: E:\data\zw1\zw1-10-116-IC-200-1-1-214.org

方法文件: E:\data\zw1\zw1.mtd

← Brief introduction of experimental conditions

实验内容简介:

zw1-10-116-ic-200-1-1-214

← Chromatogram Figure  
色谱图 (zw1-10-116-IC-200-1-1-214.org)

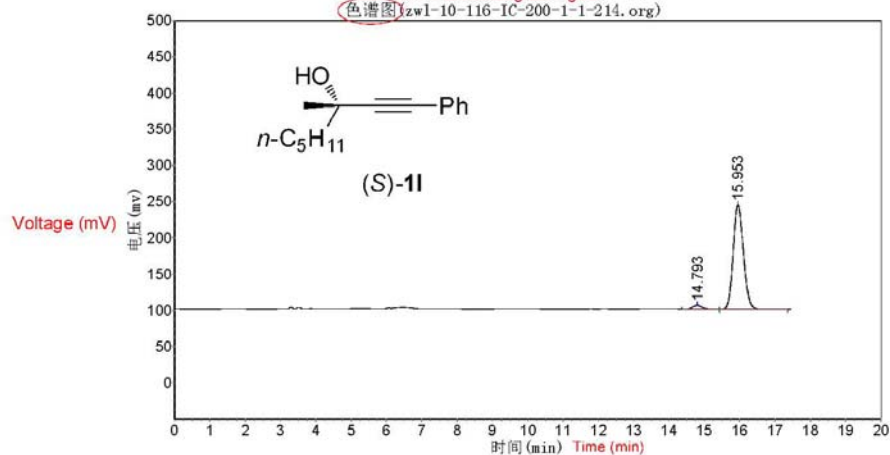

分析结果表

| 峰号(Peak No.) | 峰名(Peak name) | 保留时间(Retention time) | 峰高(Peak height) | 峰面积(Peak area) | 含量(Content) |
|--------------|---------------|----------------------|-----------------|----------------|-------------|
| 1            |               | 14.793               | 5519.999        | 105694.281     | 3.5168      |
| 2            |               | 15.953               | 144096.719      | 2899716.500    | 96.4832     |
| 总计           |               |                      | 149616.718      | 3005410.781    | 100.0000    |

## zw1-10-63

实验时间: 2017-10-18, 20:02:08

报告时间: 2017-10-18, 20:57:42

谱图文件: E:\data\zw1\zw1-10-63-IC-200-1-1-214-17.10.18.org

方法文件: E:\data\zw1\zw1.mtd

Brief introduction of experimental conditions

实验内容简介:

zw1-10-63-ic-200-1-1-214

Chromatogram Figure

色谱图 (zw1-10-63-IC-200-1-1-214-17.10.18.org)

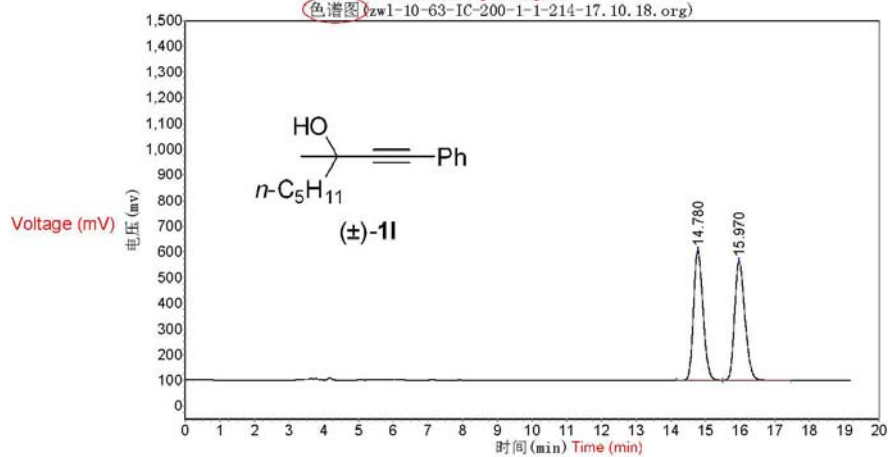

分析结果表

| 峰号 (Peak No.) | 峰名 (Peak name) | 保留时间 (Retention time) | 峰高 (Peak height) | 峰面积 (Peak area) | 含量 (Content) |
|---------------|----------------|-----------------------|------------------|-----------------|--------------|
| 1             |                | 14.780                | 506005.750       | 9542713.000     | 49.9286      |
| 2             |                | 15.970                | 462844.156       | 9569991.000     | 50.0714      |
| 总计            |                |                       | 968849.906       | 19112704.000    | 100.0000     |

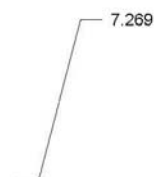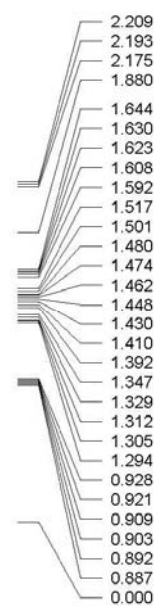

zw4-11-25-H  
Jan 14 2018  
SOLVENT: cdcl3  
NA = 8  
F1 = 399.749542 MHz  
F2 = 100.526031 MHz

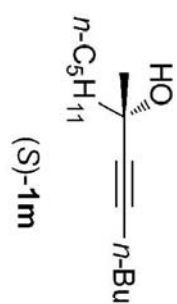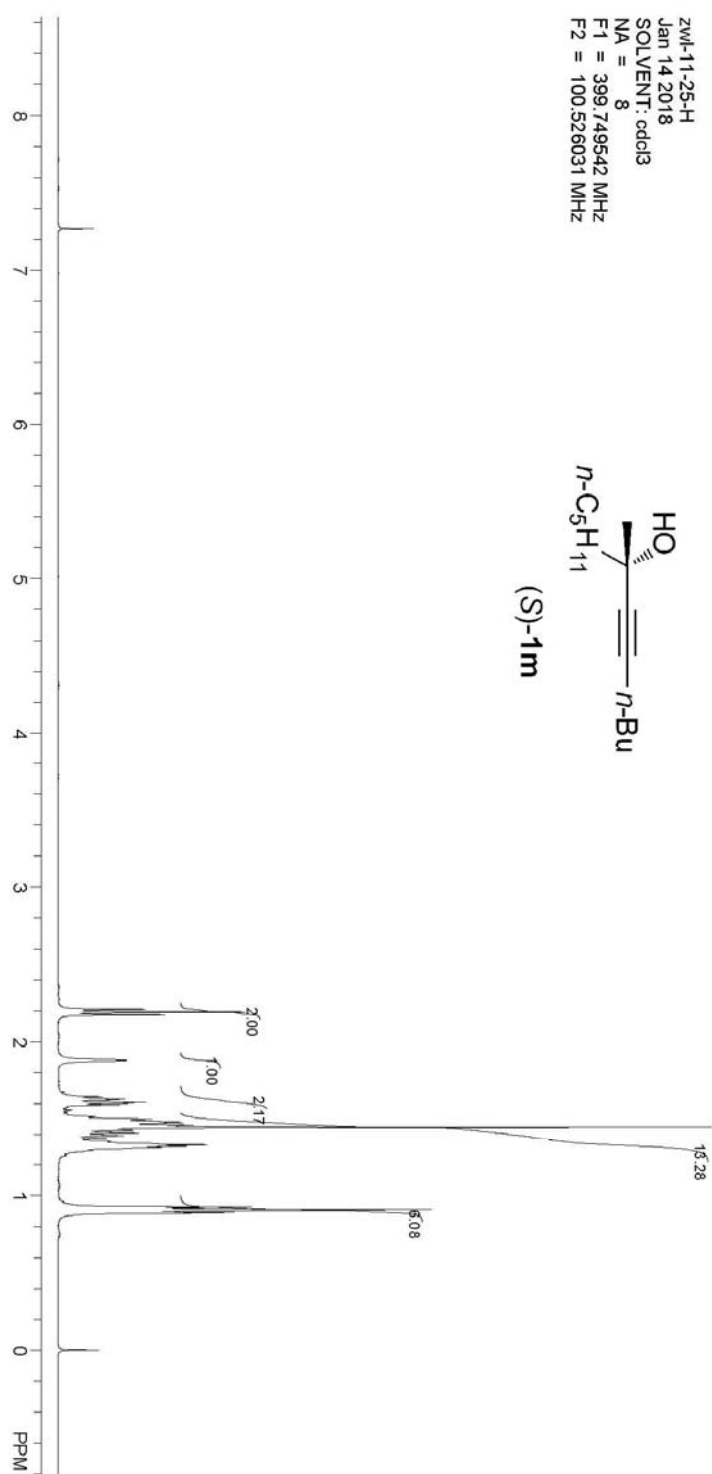

zwil-11-25-C  
 Jan 14 2018  
 SOLVENT: cdcl3  
 NA = 1000  
 F1 = 100.527557 MHz  
 F2 = 399.749146 MHz

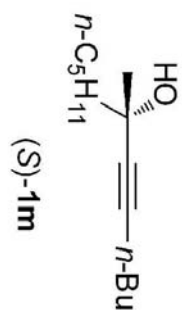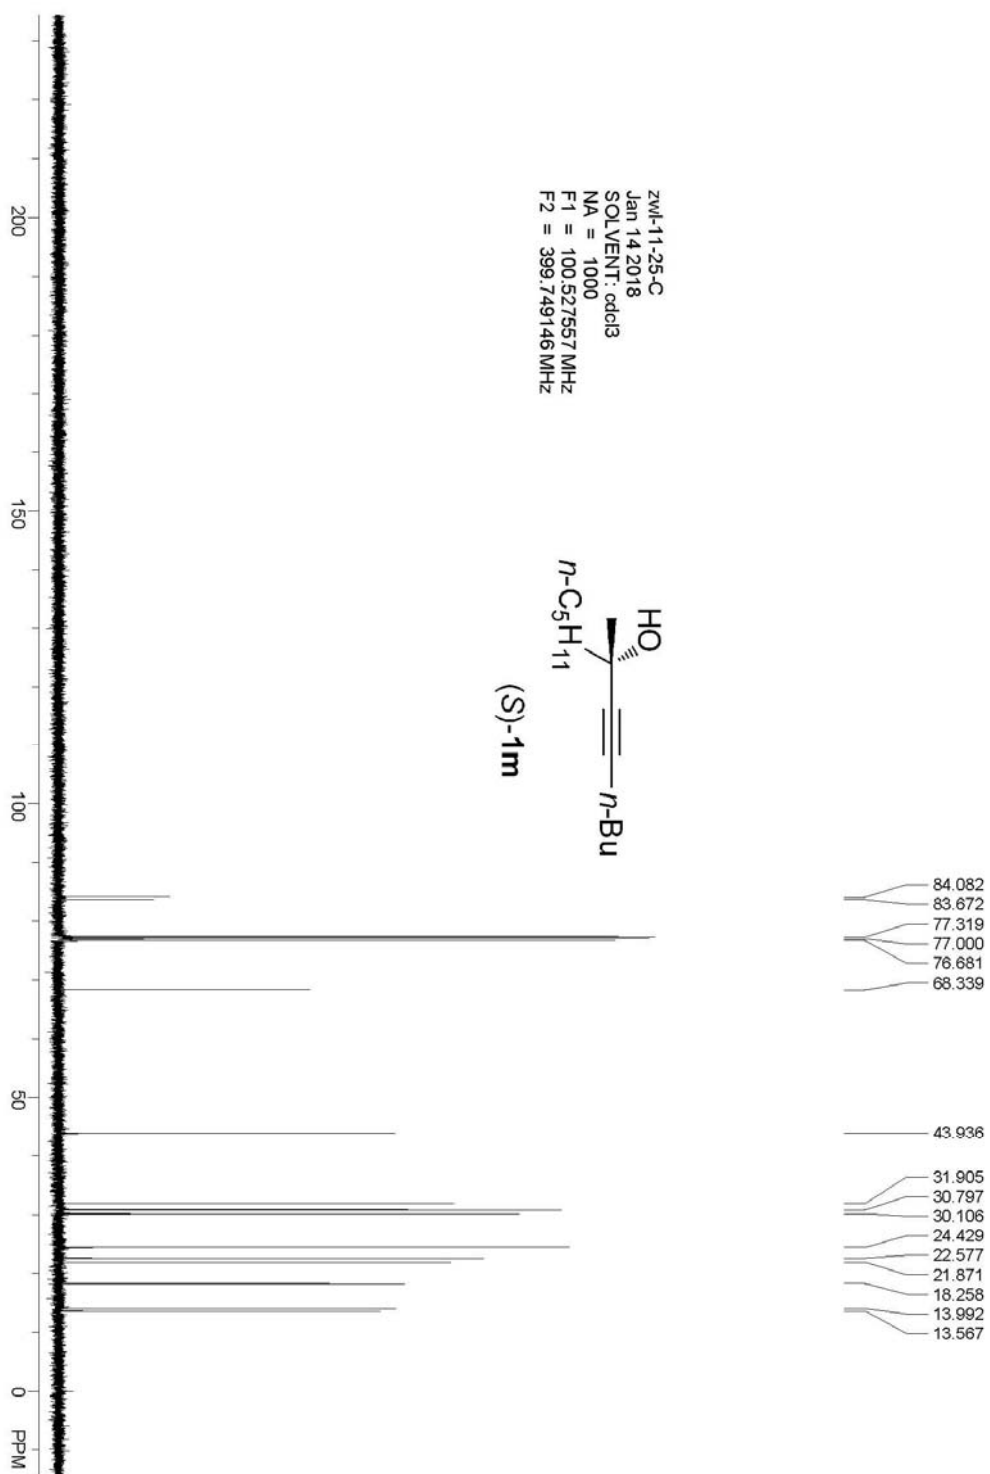

## zw1-11-25

实验时间: 2018-01-10, 19:30:17

报告时间: 2018-01-10, 20:18:16

谱图文件: E:\data\zw1\zw1-11-25-ad-h-100-1-1-214-18.1.10.org

方法文件: E:\data\zw1\zw1.mtd

← Brief introduction of experimental conditions

实验内容简介:

zw1-11-25-ad-h-100-1-1-214

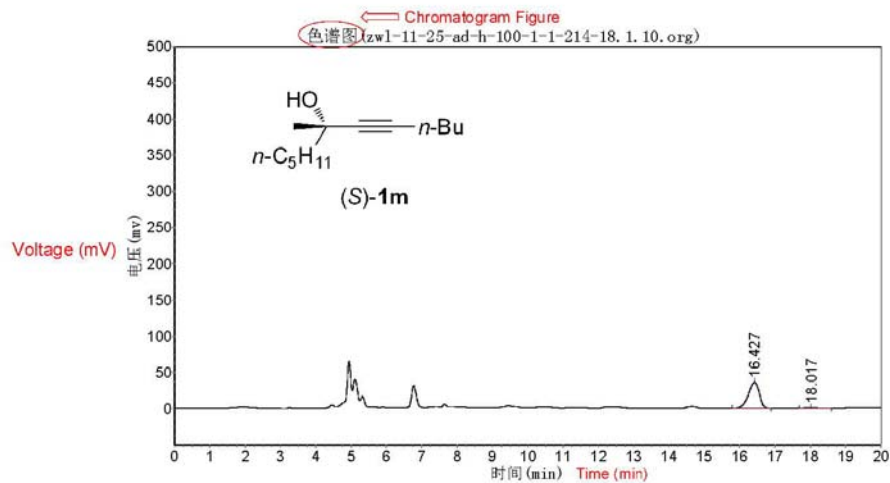

分析结果表

| 峰号 (Peak No.) | 峰名 (Peak name) | 保留时间 (Retention time) | 峰高 (Peak height) | 峰面积 (Peak area) | 含量 (Content) |
|---------------|----------------|-----------------------|------------------|-----------------|--------------|
| 1             |                | 16.427                | 35815.621        | 763236.188      | 98.0941      |
| 2             |                | 18.017                | 785.474          | 14828.752       | 1.9059       |
| 总计            |                |                       | 36601.095        | 778064.939      | 100.0000     |

## zw1-6-130

实验时间: 2018-01-10, 20:16:41

报告时间: 2018-01-10, 20:38:18

谱图文件: E:\data\zw1\zw1-6-130-ad-h-100-1-1-214-18.1.10.org

方法文件: E:\data\zw1\zw1.mtd

← Brief introduction of experimental conditions

实验内容简介:

zw1-6-130-ad-h-100-1-1-214

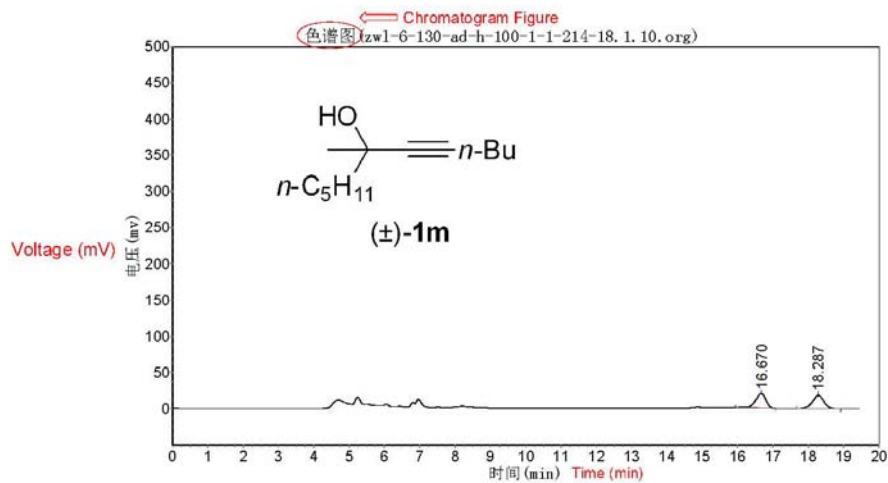

分析结果表

| 峰号 (Peak No.) | 峰名 (Peak name) | 保留时间 (Retention time) | 峰高 (Peak height) | 峰面积 (Peak area) | 含量 (Content) |
|---------------|----------------|-----------------------|------------------|-----------------|--------------|
| 1             |                | 16.670                | 20019.238        | 408204.313      | 50.4626      |
| 2             |                | 18.287                | 18316.678        | 400720.000      | 49.5374      |
| 总计            |                |                       | 38335.916        | 808924.313      | 100.0000     |

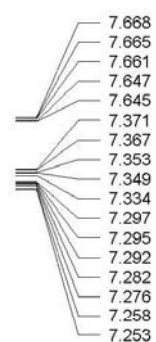

zwf-10-24-H  
Jul 4 2017  
SOLVENT: cdcl3  
NA = 4  
F1 = 399.749542 MHz  
F2 = 100.526031 MHz

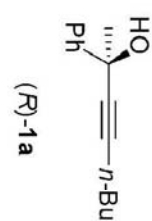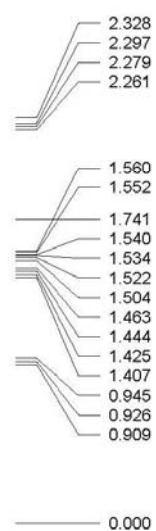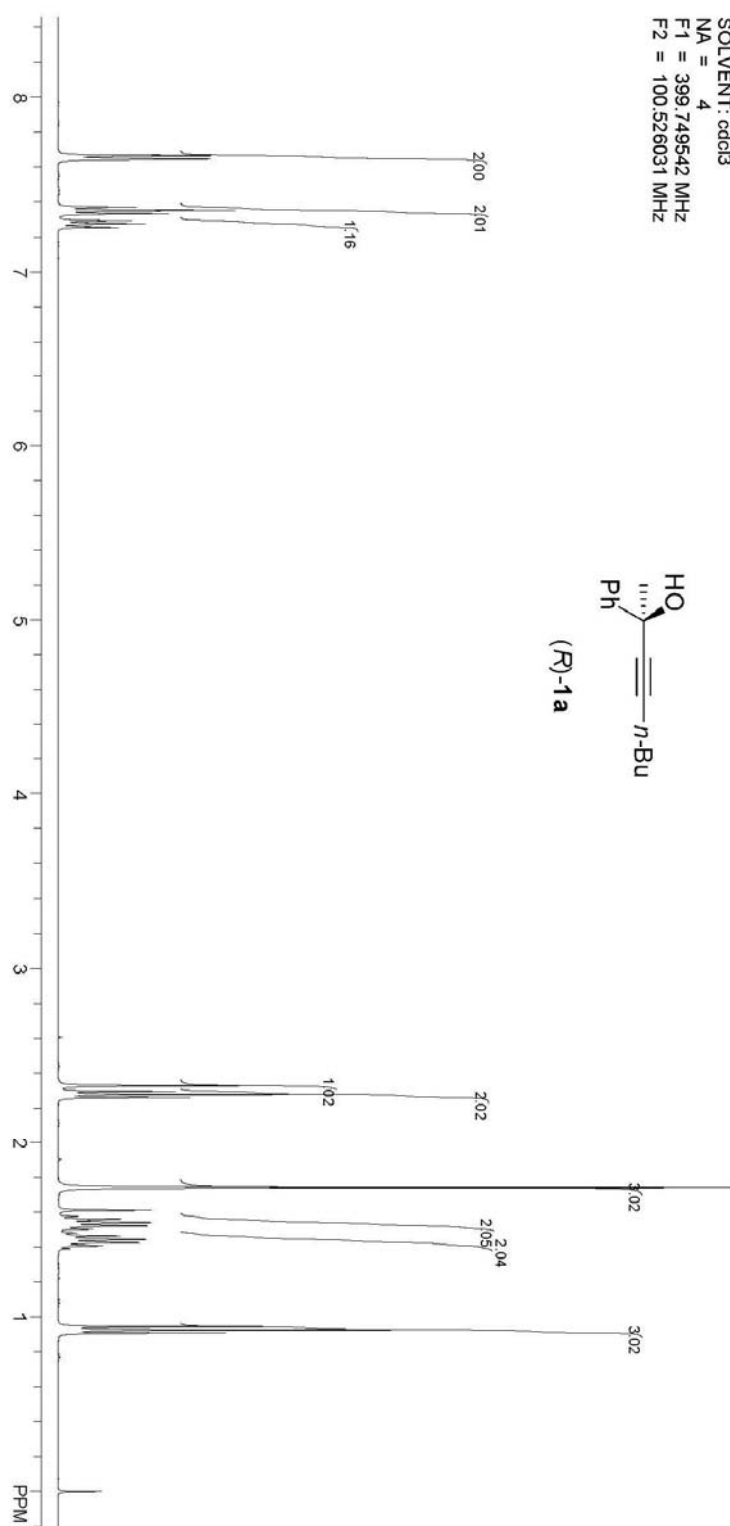

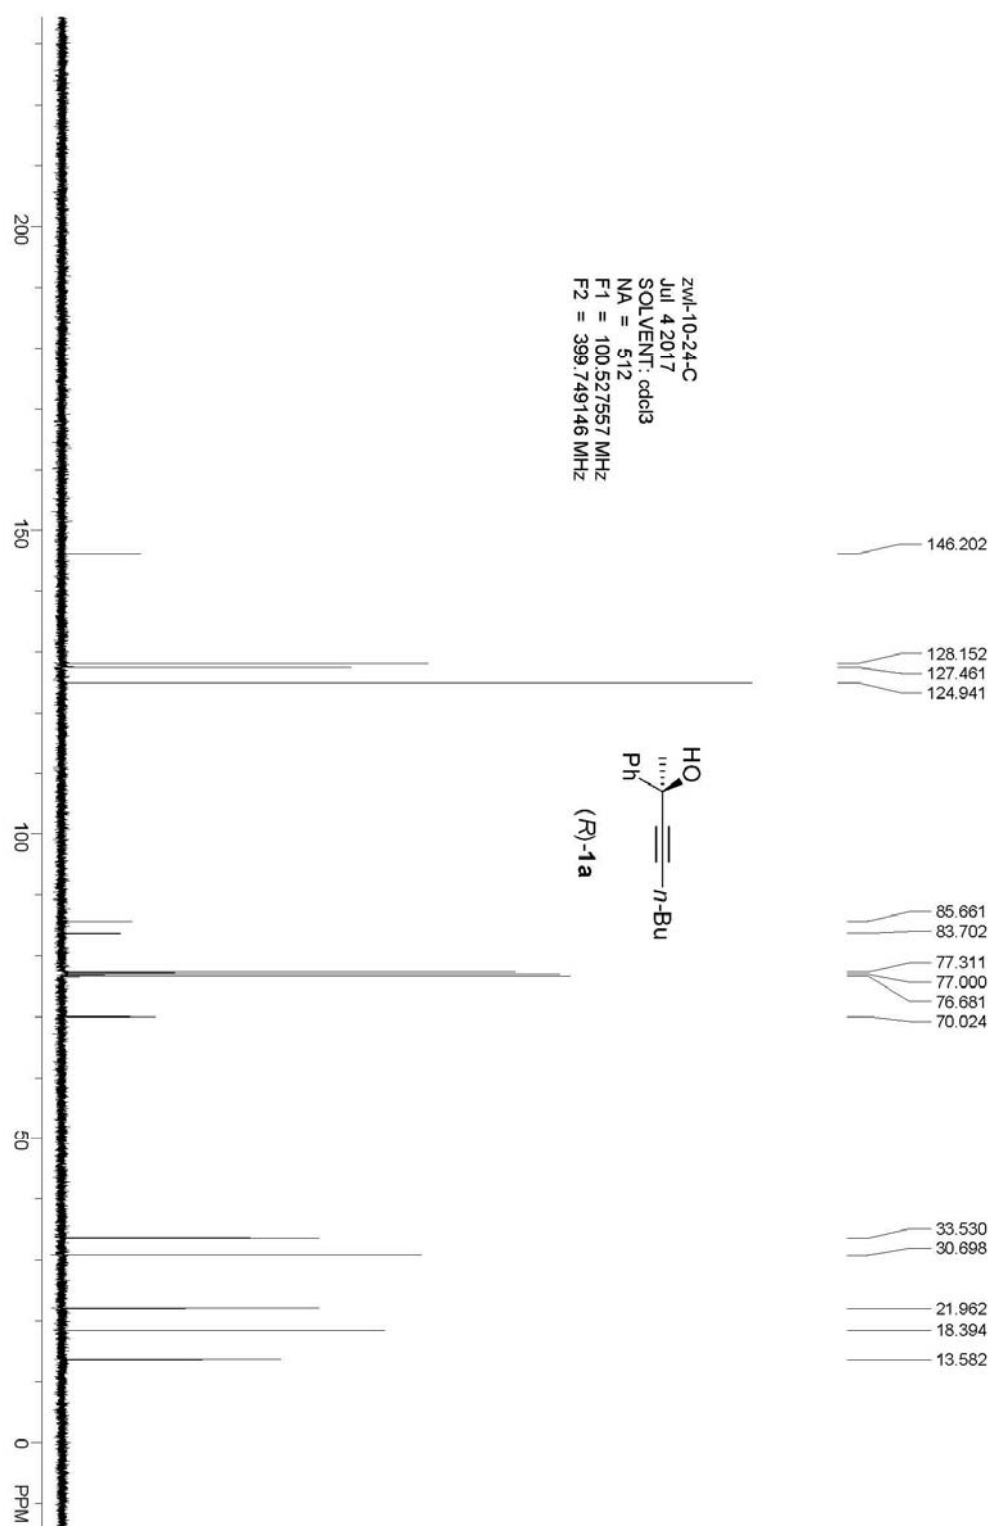

# zw1-10-24

实验时间: 2017-06-19, 21:05:41

报告时间: 2017-06-19, 21:33:07

谱图文件: D:\data\zw1\zw1-10-24-od-h-200-1-1-214. org

Brief introduction of experimental conditions

实验内容简介:

zw1-10-24-od-h-200-1-1-214

Chromatogram Figure

(色谱图) zw1-10-24-od-h-200-1-1-214. org

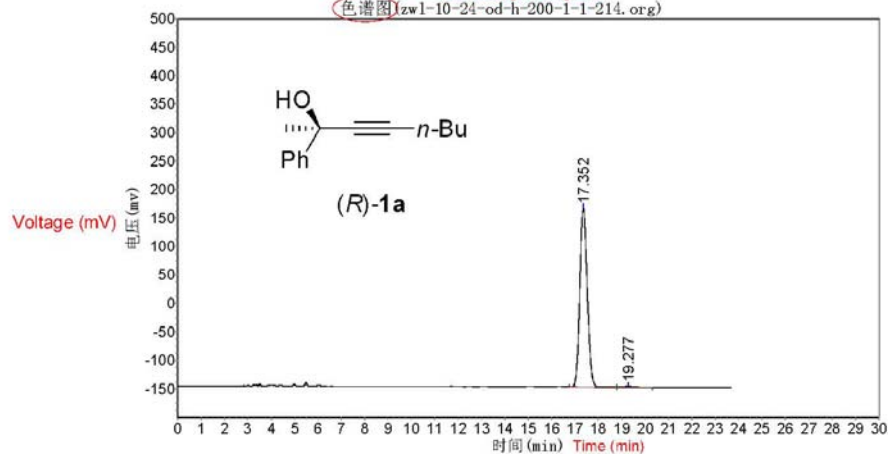

分析结果表

| 峰号 (Peak No.) | 峰名 (Peak name) | 保留时间 (Retention time) | 峰高 (Peak height) | 峰面积 (Peak area) | 含量 (Content) |
|---------------|----------------|-----------------------|------------------|-----------------|--------------|
| 1             |                | 17.352                | 314792.344       | 6976912.500     | 99.1730      |
| 2             |                | 19.277                | 2288.860         | 58176.422       | 0.8269       |
| 总计            |                |                       | 317081.204       | 7035088.922     | 100.0000     |

# zw1-9-184

实验时间: 2017-06-19, 20:30:18

谱图文件: D:\data\zw1\zw1-9-184-200-1-1-214-17.6.19.org

报告时间: 2017-06-19, 21:09:51

Brief introduction of experimental conditions

实验内容简介:

zw1-9-184-od-h-200-1-1-214

Chromatogram Figure

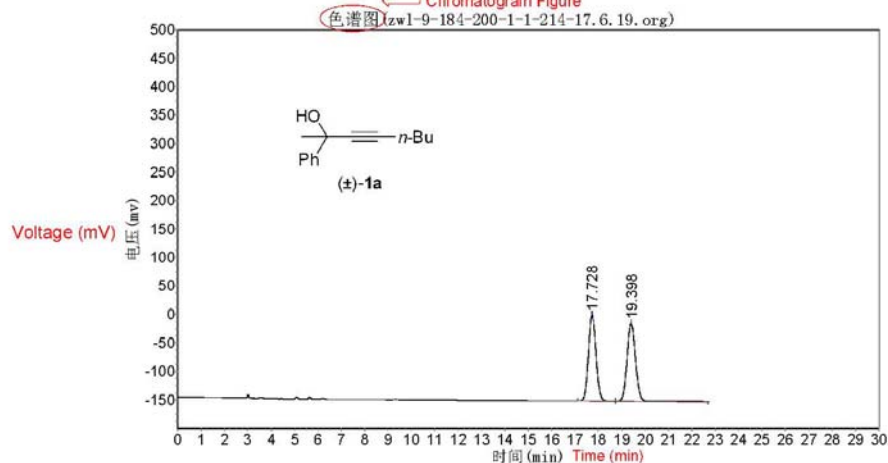

分析结果表

| 峰号 (Peak No.) | 峰名 (Peak name) | 保留时间 (Retention time) | 峰高 (Peak height) | 峰面积 (Peak area) | 含量 (Content) |
|---------------|----------------|-----------------------|------------------|-----------------|--------------|
| 1             |                | 17.728                | 150981.813       | 3379982.000     | 49.9012      |
| 2             |                | 19.398                | 136656.313       | 3393361.250     | 50.0988      |
| 总计            |                |                       | 287638.125       | 6773343.250     | 100.0000     |

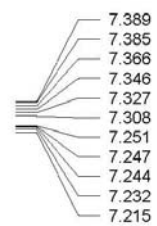

zwl-8-173-1-H  
Jul 17 2016  
SOLVENT: cdcl3  
NA = 8  
F1 = 399.749542 MHz  
F2 = 100.526031 MHz

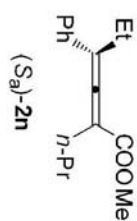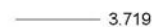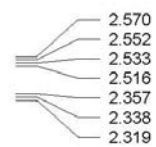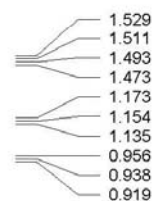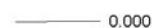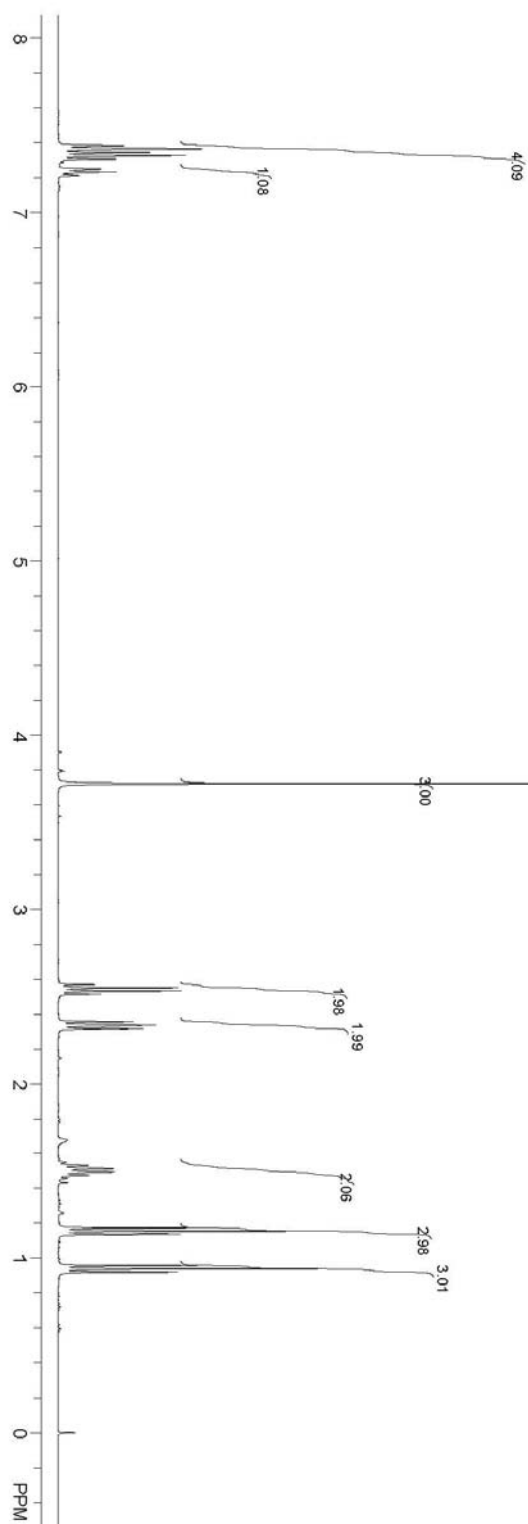

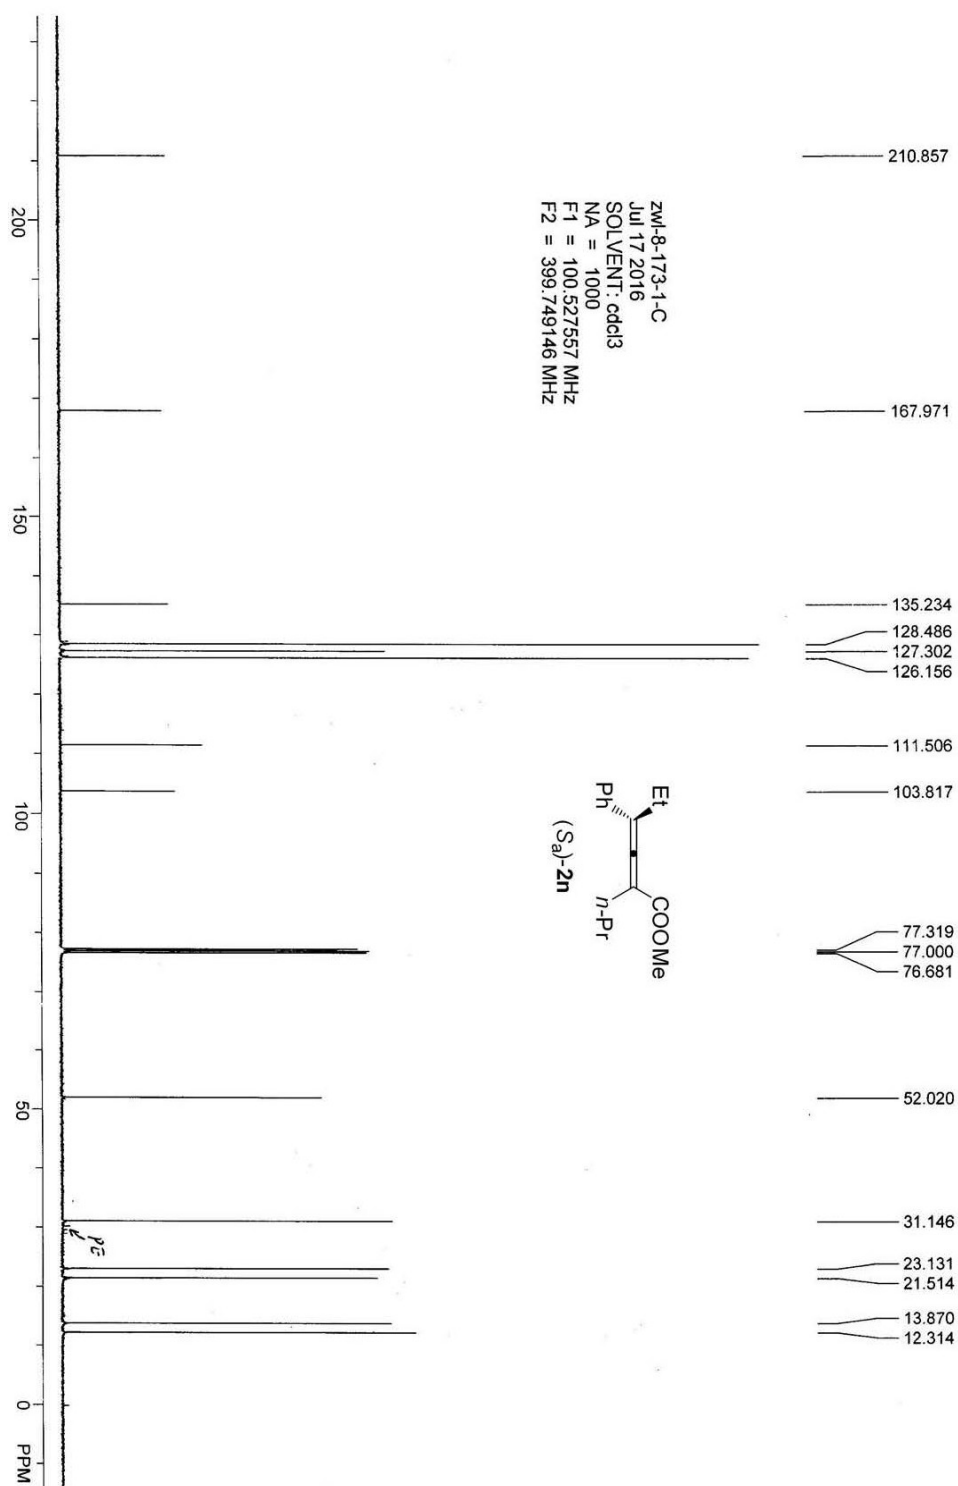

zw1-8-173-1-ic-200-1-1-214

实验时间: 2016/6/17, 13:06:41 报告时间: 2016/6/17, 18:22:24  
谱图文件:D:\zhuguangjiang\zw1\20160616\zw1-8-173-1-ic-200-1-1-214...org

实验内容简介:

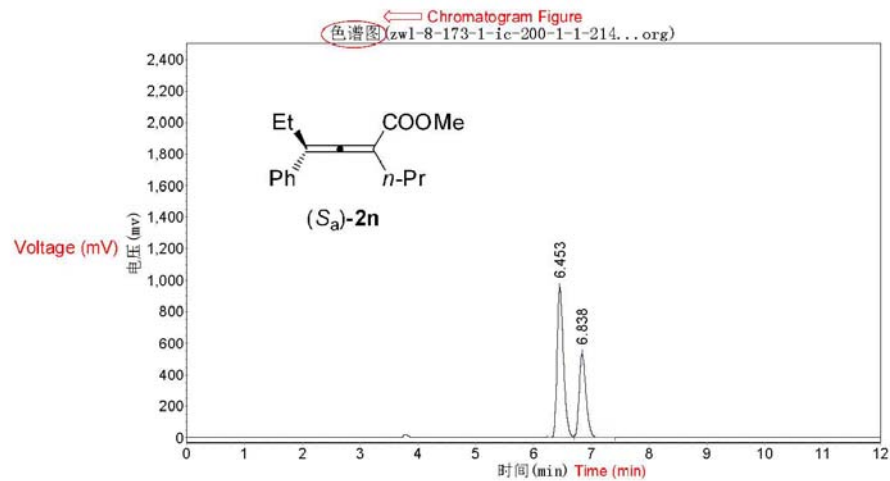

分析结果表

| 峰号 (Peak No.) | 峰名 (Peak name) | 保留时间 (Retention time) | 峰高 (Peak height) | 峰面积 (Peak area) | 含量 (Content) |
|---------------|----------------|-----------------------|------------------|-----------------|--------------|
| 1             |                | 6.453                 | 956853.938       | 7425737.000     | 62.5994      |
| 2             |                | 6.838                 | 536793.813       | 4436579.000     | 37.4006      |
| 总计            |                |                       | 1493647.750      | 11862316.000    | 100.0000     |

zw1-8-25-ic-200-1-1-214

实验时间: 2016/6/17, 12:48:06  
请图文件:D:\zhuguangjiang\zw1\20160616\zw1-8-25-ic-200-1-1-214..org

报告时间: 2016/6/17, 18:21:40

实验内容简介:

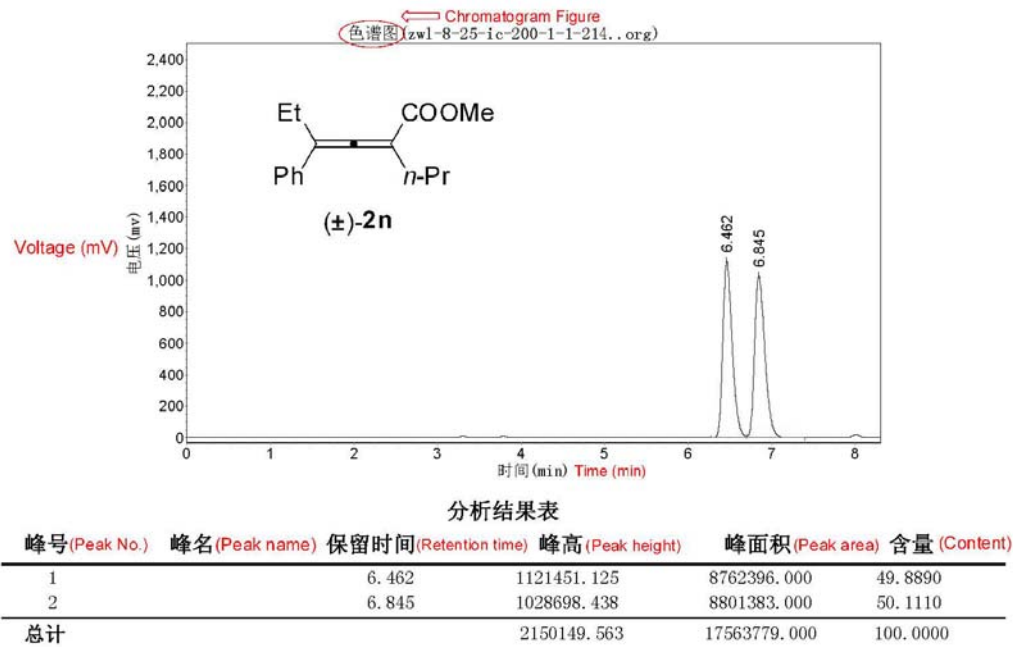

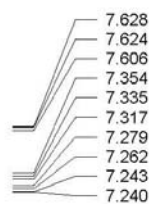

zwl-8-173-2-H  
Jul 17 2016  
SOLVENT: cdcl3  
NA = 8  
F1 = 399.749542 MHz  
F2 = 100.526031 MHz

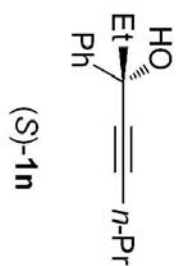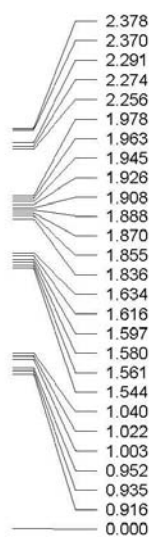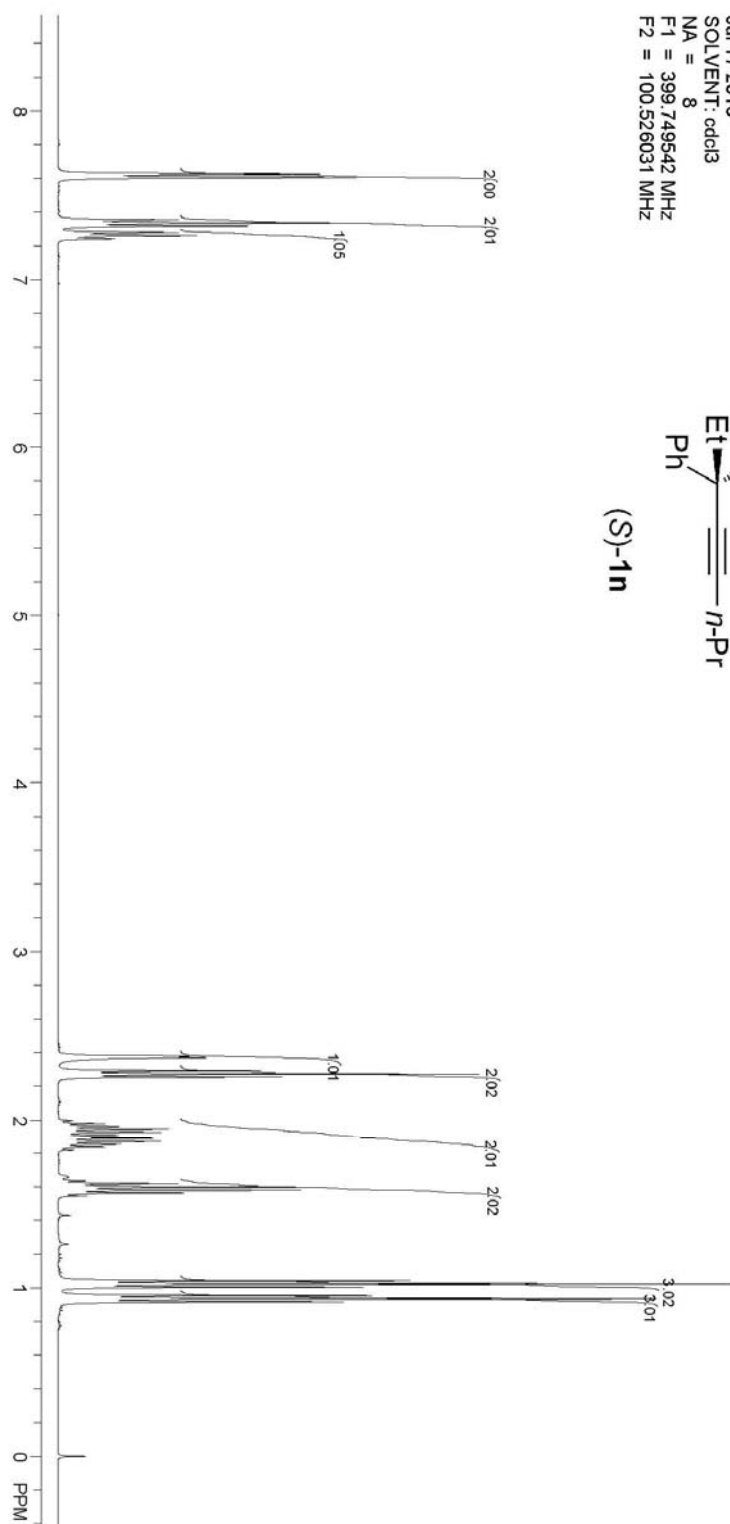

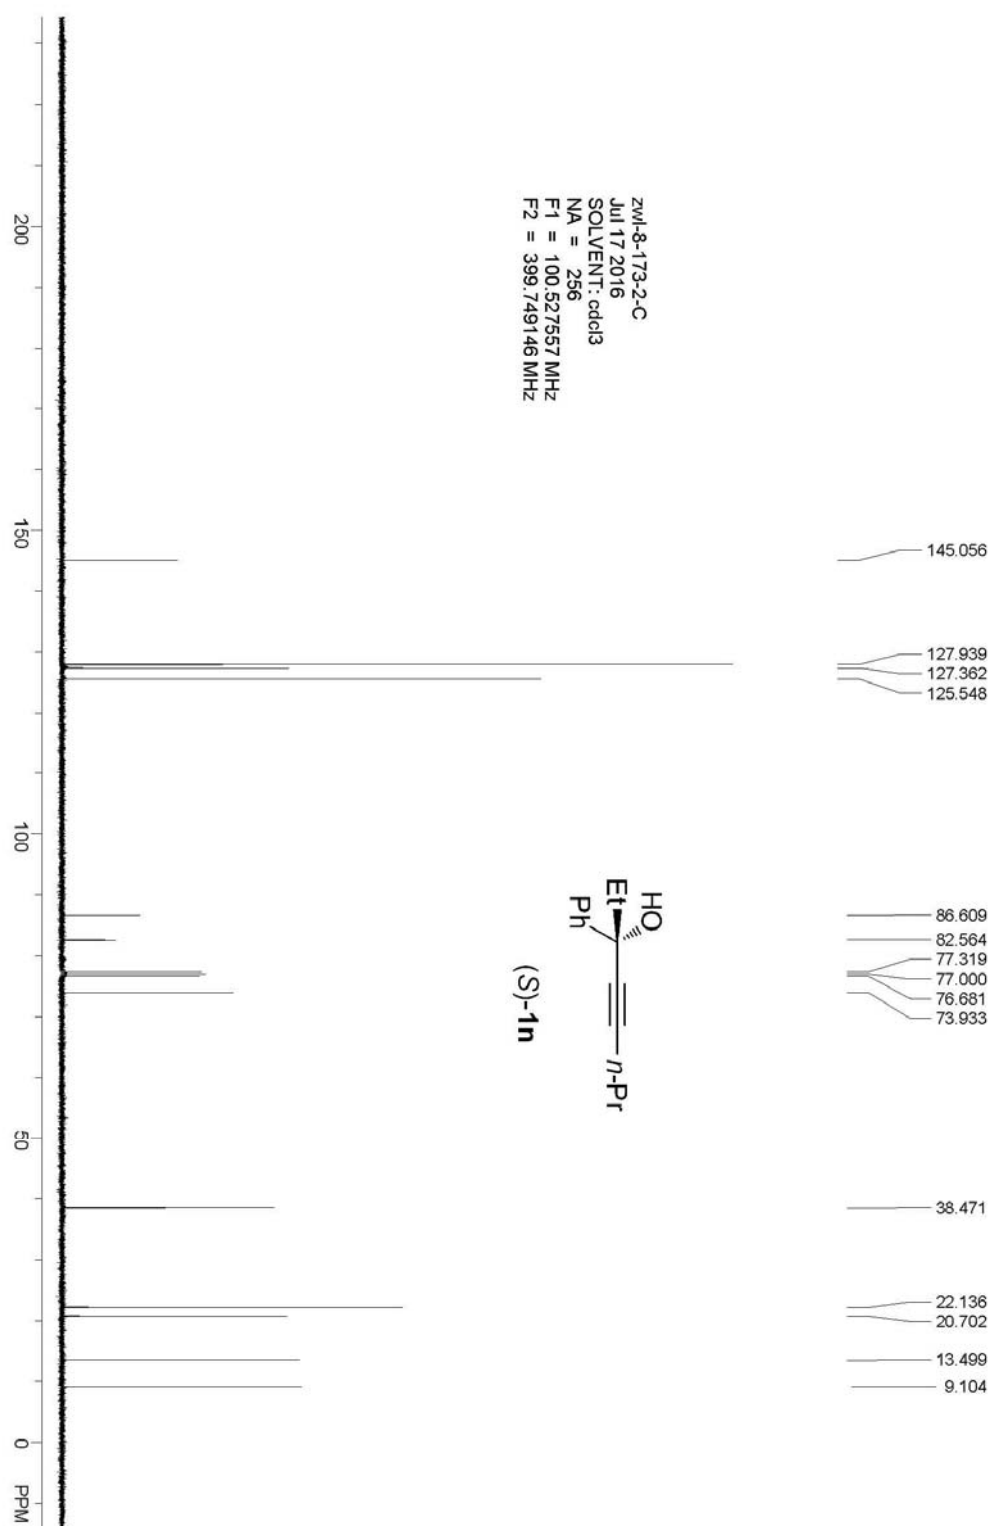

zw1-8-173-2-wheelk-200-1-1-214

实验时间: 2016/6/17, 9:02:41 报告时间: 2016/6/17, 18:20:38  
谱图文件: D:\zhuguangji\zw1\20160616\zw1-8-173-2-wheelk-200-1-1-214..org

实验内容简介:

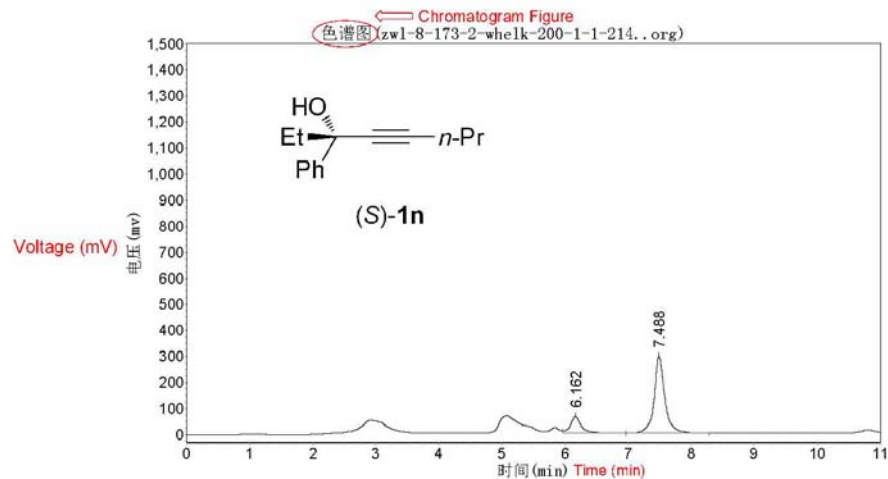

分析结果表

| 峰号(Peak No.) | 峰名(Peak name) | 保留时间(Retention time) | 峰高(Peak height) | 峰面积(Peak area) | 含量(Content) |
|--------------|---------------|----------------------|-----------------|----------------|-------------|
| 1            |               | 6.162                | 63770.379       | 796828.250     | 18.4311     |
| 2            |               | 7.488                | 295348.969      | 3526455.750    | 81.5689     |
| 总计           |               |                      | 359119.348      | 4323284.000    | 100.0000    |

# zw1-8-16-wheelk-200-1-1-214

实验时间: 2016/6/17, 9:23:33 报告时间: 2016/6/17, 18:19:48  
 谱图文件: D:\zhuguangjiang\zw1\20160616\zw1-8-16-wheelk-200-1-1-214..org

实验内容简介:

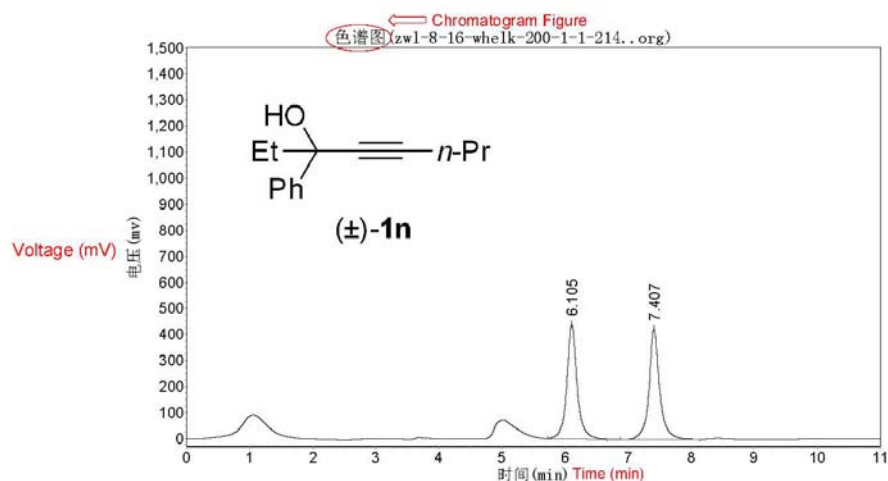

分析结果表

| 峰号(Peak No.) | 峰名(Peak name) | 保留时间(Retention time) | 峰高(Peak height) | 峰面积(Peak area) | 含量(Content) |
|--------------|---------------|----------------------|-----------------|----------------|-------------|
| 1            |               | 6.105                | 437453.531      | 5007110.500    | 49.8224     |
| 2            |               | 7.407                | 423874.688      | 5042801.500    | 50.1776     |
| 总计           |               |                      | 861328.219      | 10049912.000   | 100.0000    |

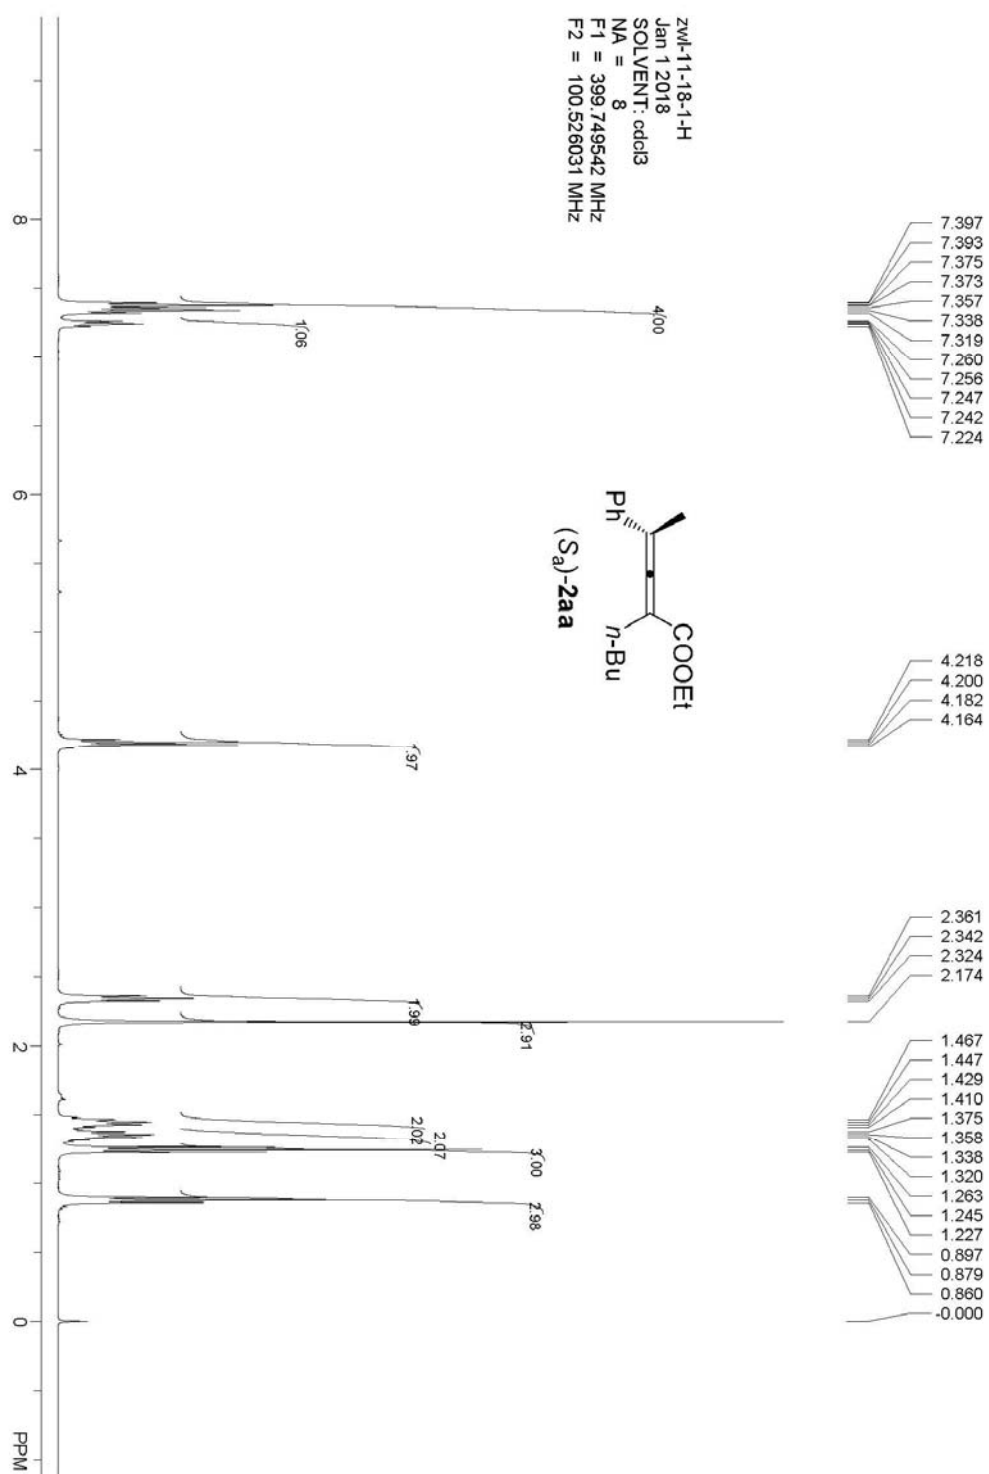

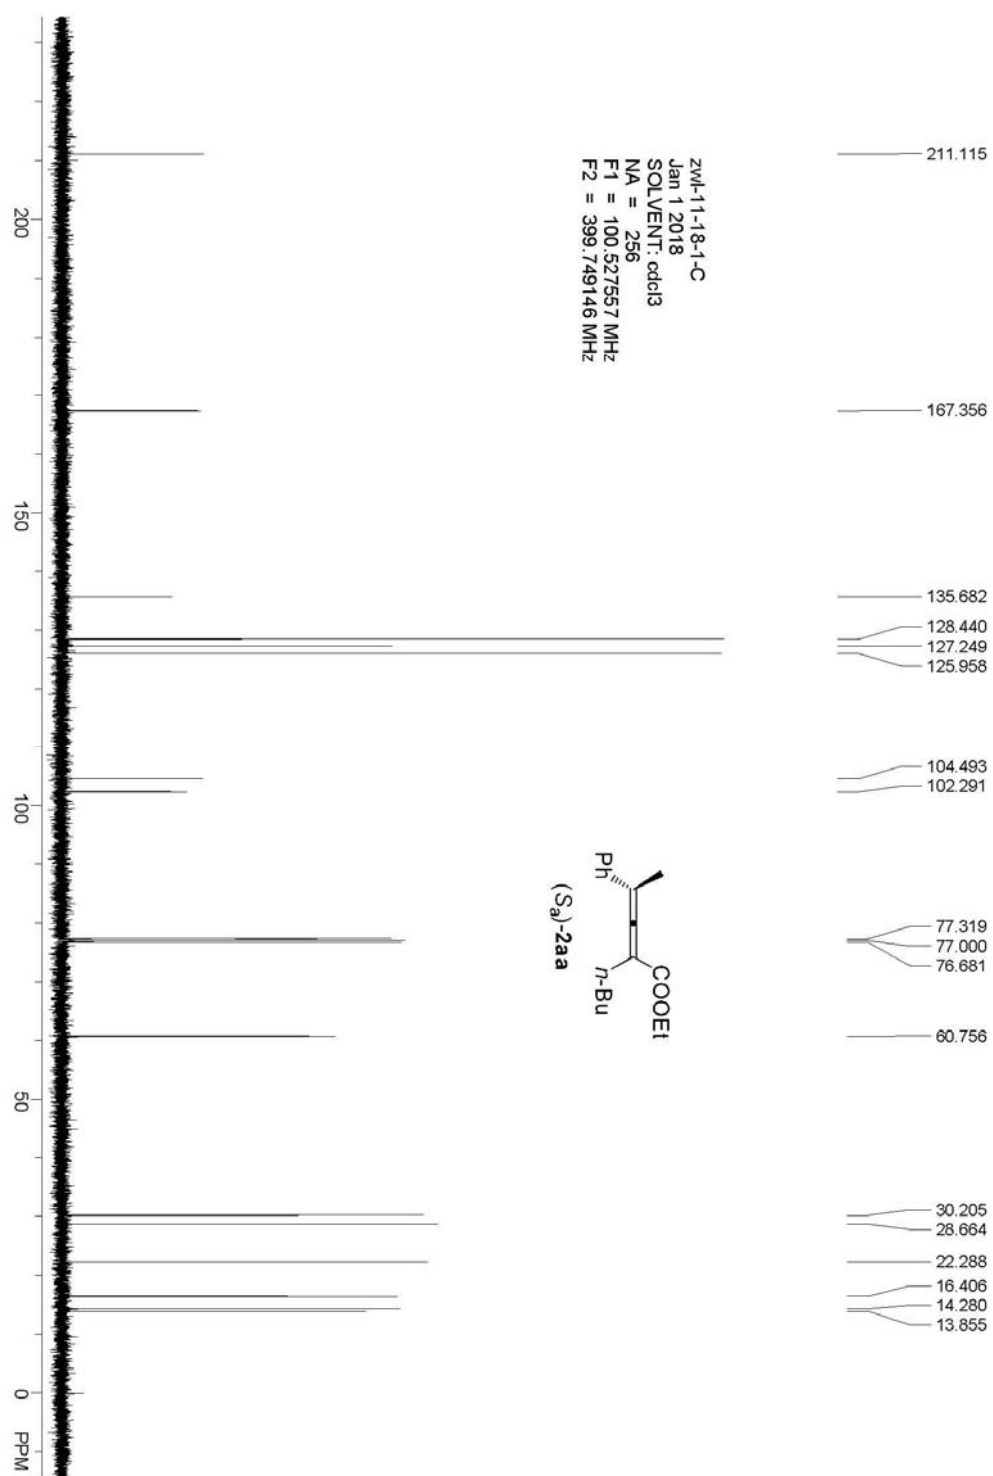

zw1-11-18-1-whelk-r, r-200-1-1-214

实验时间: 2018-01-09, 13:35:56  
请图文件: D:\zhuguangjiang\zw1\20180109\zw1-11-18-1-whelk-r, r-200-1-1-214. . org

报告时间: 2018-01-19, 14:23:23

实验内容简介:

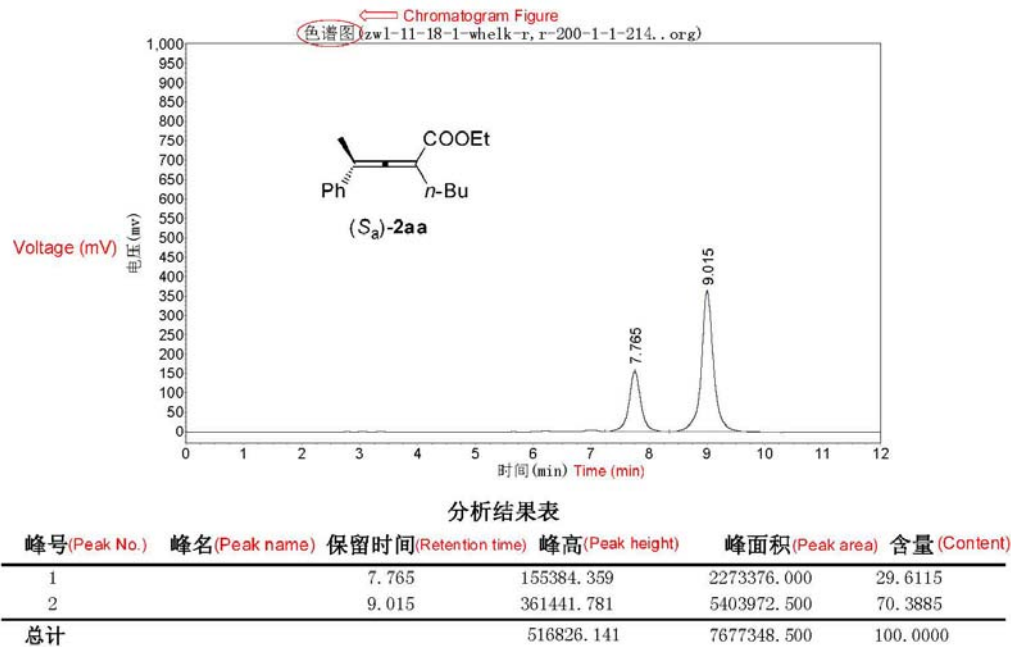

zw1-8-113-wheelk-r, r-200-1-1-214

实验时间: 2018-01-09, 13:06:36  
谱图文件: D:\zhuguangjiang\zw1\20180109\zw1-8-113-wheelk-r, r-200-1-1-214. org

报告时间: 2018-01-19, 14:21:00

实验内容简介:

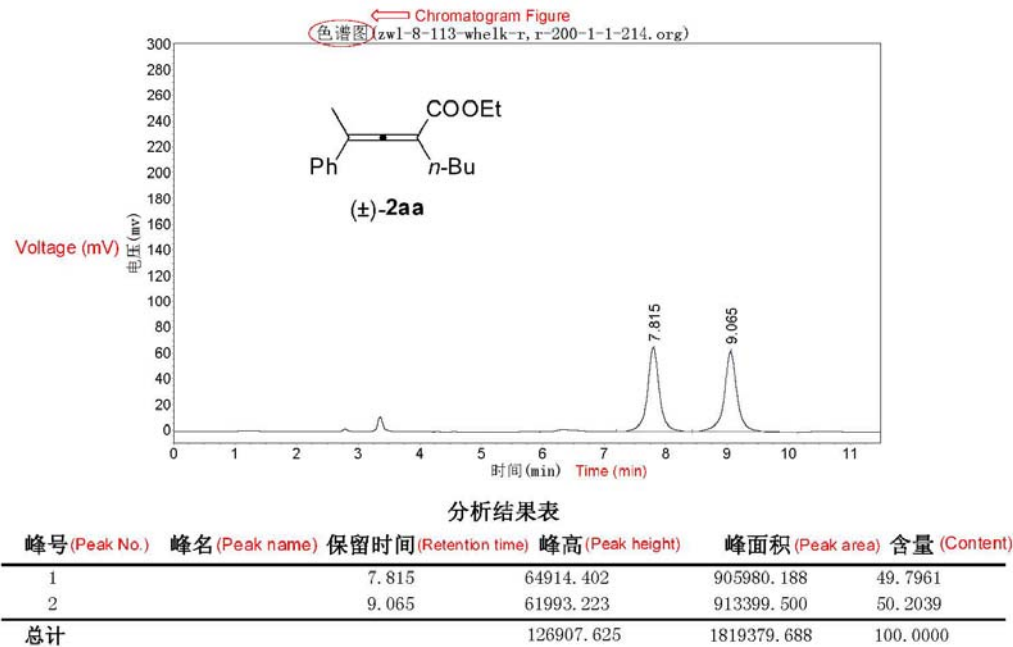

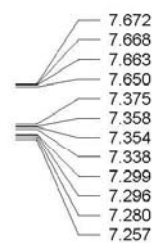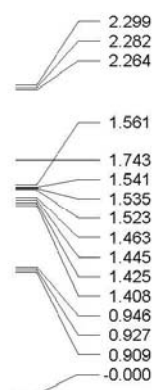

zw/-11-18-2-H  
 Jan 3 2018  
 SOLVENT: cdcl3  
 NA = 4  
 F1 = 399.749542 MHz  
 F2 = 100.526031 MHz

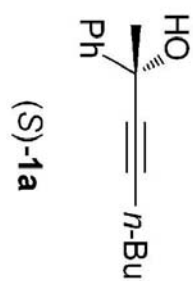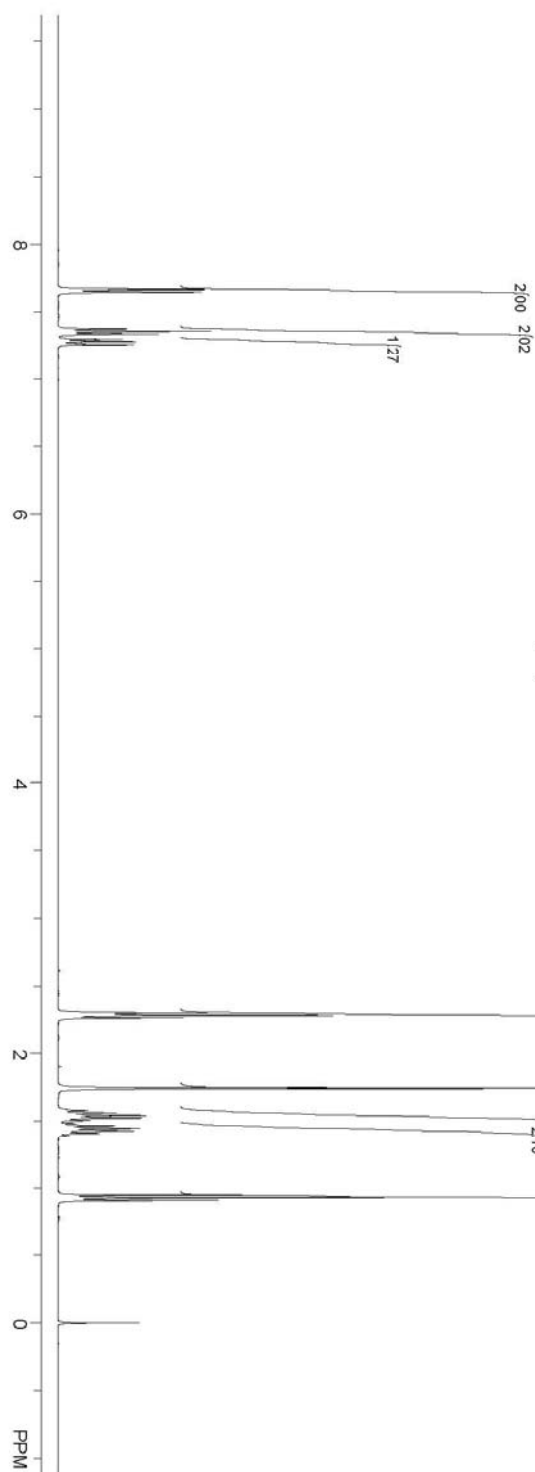

## zw1-11-18-2

实验时间: 2018-01-03, 16:10:23

报告时间: 2018-01-03, 16:41:02

谱图文件: E:\data\zw1\zw1-11-18-2-wheelk-s, s-200-1-1-214. org

方法文件: E:\data\zw1\zw1. mtd

Brief introduction of experimental conditions

实验内容简介:

zw1-11-18-2-wheelk-s, s-200-1-1-214

Chromatogram Figure

色谱图 (zw1-11-18-2-wheelk-s, s-200-1-1-214. org)

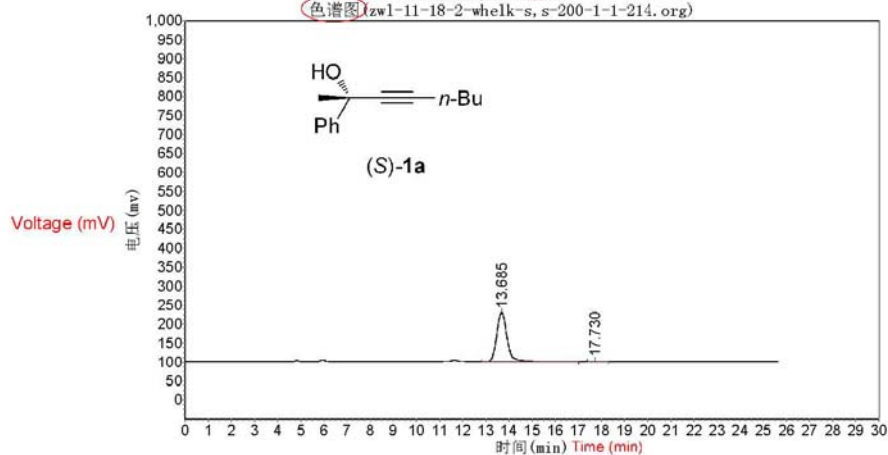

分析结果表

| 峰号 (Peak No.) | 峰名 (Peak name) | 保留时间 (Retention time) | 峰高 (Peak height) | 峰面积 (Peak area) | 含量 (Content) |
|---------------|----------------|-----------------------|------------------|-----------------|--------------|
| 1             |                | 13.685                | 129390.258       | 4035790.750     | 99.7614      |
| 2             |                | 17.730                | 370.315          | 9653.605        | 0.2386       |
| 总计            |                |                       | 129760.572       | 4045444.355     | 100.0000     |

## zw1-10-177

实验时间: 2018-01-03, 14:58:04

报告时间: 2018-01-03, 15:56:13

谱图文件: E:\data\zw1\zw1-10-177-wheelk-s, s-200-1-1-214-

18.1.3.org

方法文件: E:\data\zw1\zw1.mtd

实验内容简介: Brief introduction of experimental conditions

zw1-10-177-wheelk-s, s-200-1-1-214

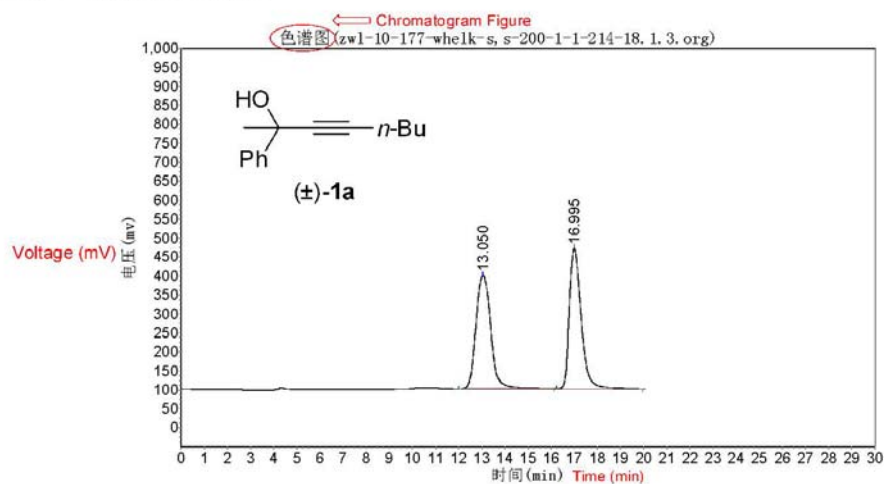

分析结果表

| 峰号 (Peak No.) | 峰名 (Peak name) | 保留时间 (Retention time) | 峰高 (Peak height) | 峰面积 (Peak area) | 含量 (Content) |
|---------------|----------------|-----------------------|------------------|-----------------|--------------|
| 1             |                | 13.050                | 298480.719       | 13337632.000    | 50.2526      |
| 2             |                | 16.995                | 370224.250       | 13203545.000    | 49.7474      |
| 总计            |                |                       | 668704.969       | 26541177.000    | 100.0000     |

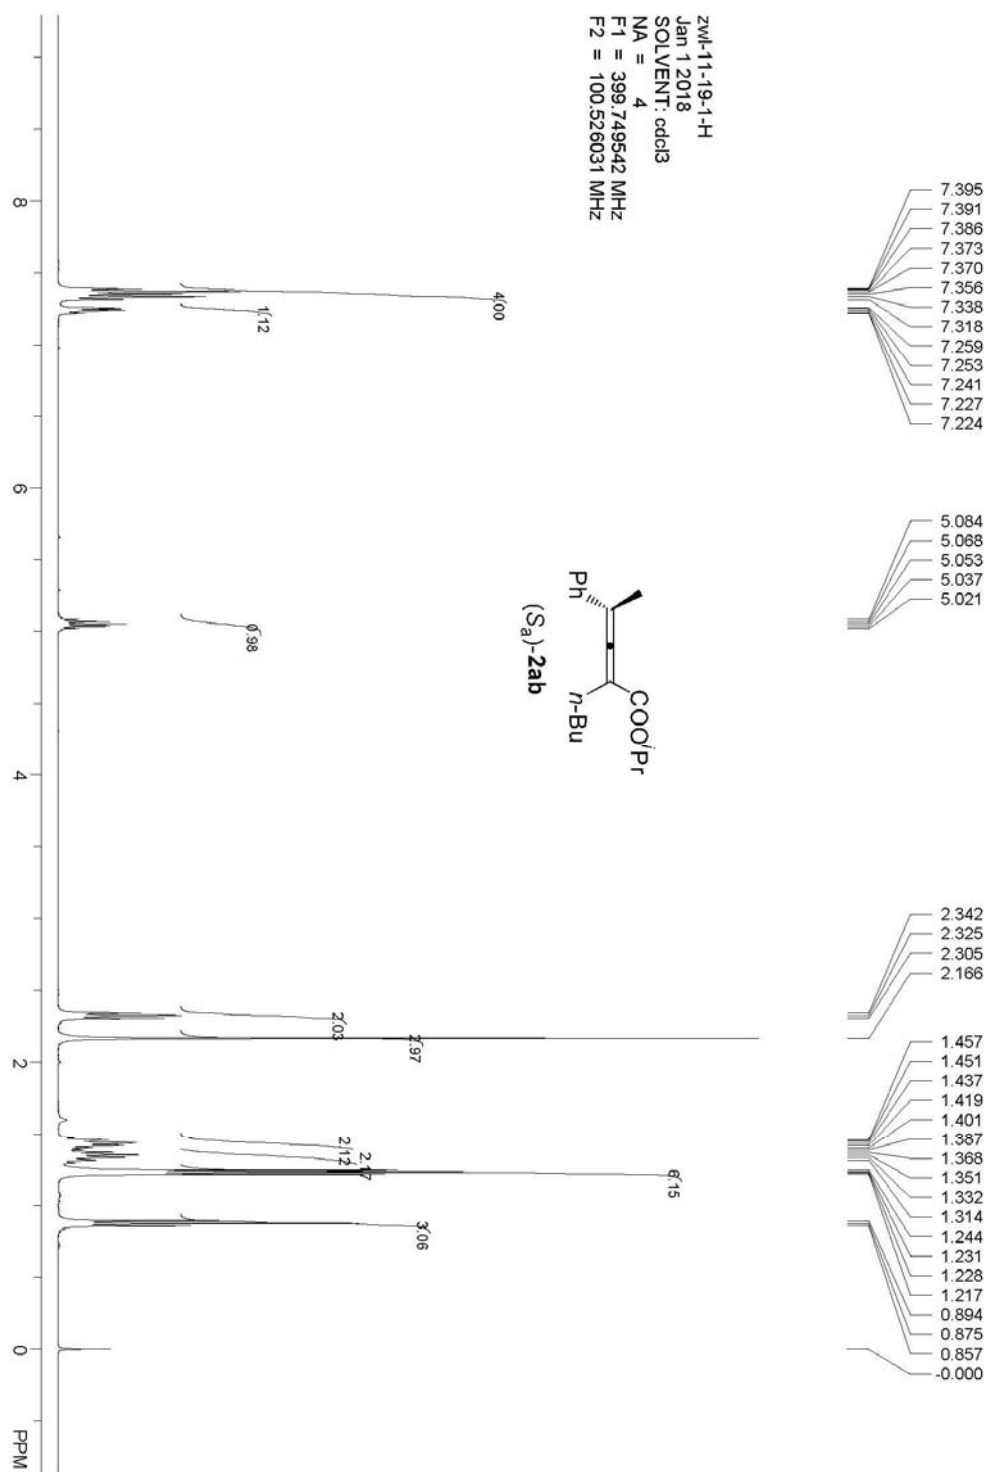

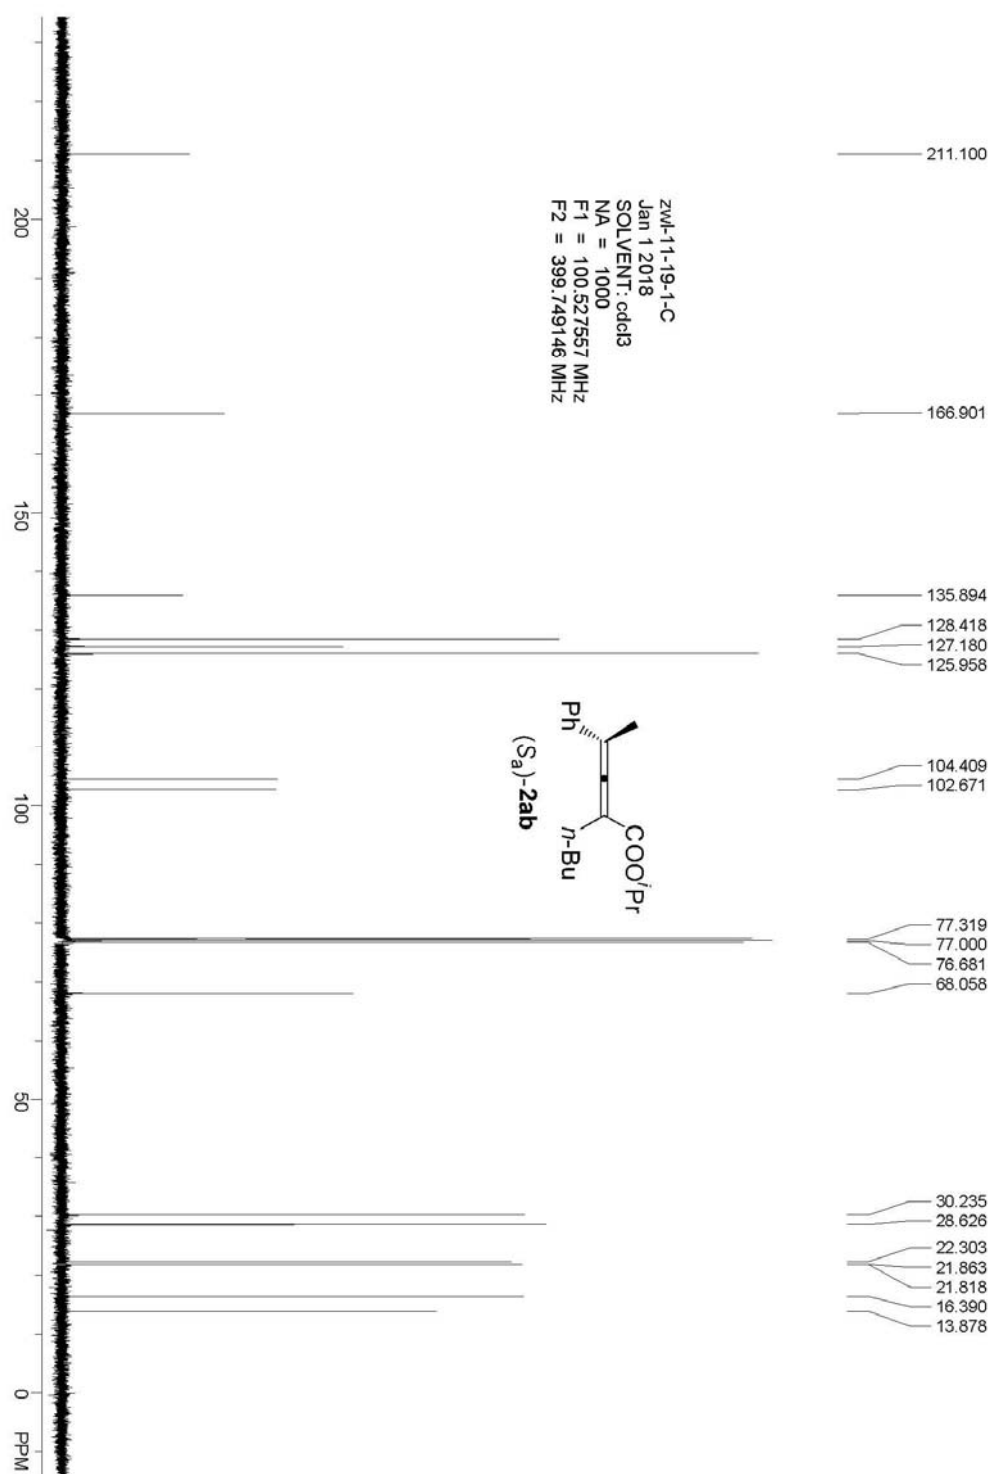

zwl-11-19-1-whelk-r, r-200-1-1-214

实验时间: 2018-01-09, 15:37:43      报告时间: 2018-01-19, 14:24:17  
谱图文件: D:\zhuguangji\zwl\20180109\zwl-11-19-1-whelk-r, r-200-1-1-214. . org

实验内容简介:

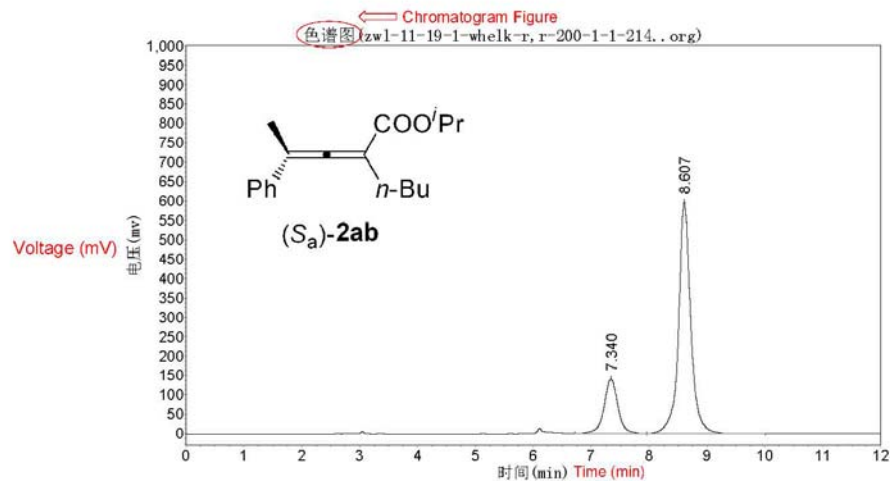

分析结果表

| 峰号(Peak No.) | 峰名(Peak name) | 保留时间(Retention time) | 峰高(Peak height) | 峰面积(Peak area) | 含量(Content) |
|--------------|---------------|----------------------|-----------------|----------------|-------------|
| 1            |               | 7.340                | 141313.141      | 2368081.750    | 21.2115     |
| 2            |               | 8.607                | 597790.563      | 8796077.000    | 78.7885     |
| 总计           |               |                      | 739103.703      | 11164158.750   | 100.0000    |

zw1-8-114-wheelk-r, r-200-1-1-214

实验时间: 2018-01-09, 15:09:31  
谱图文件: D:\zhuguangji\zw1\20180109\zw1-8-114-wheelk-r, r-200-1-1-214. org

报告时间: 2018-01-19, 14:21:53

实验内容简介:

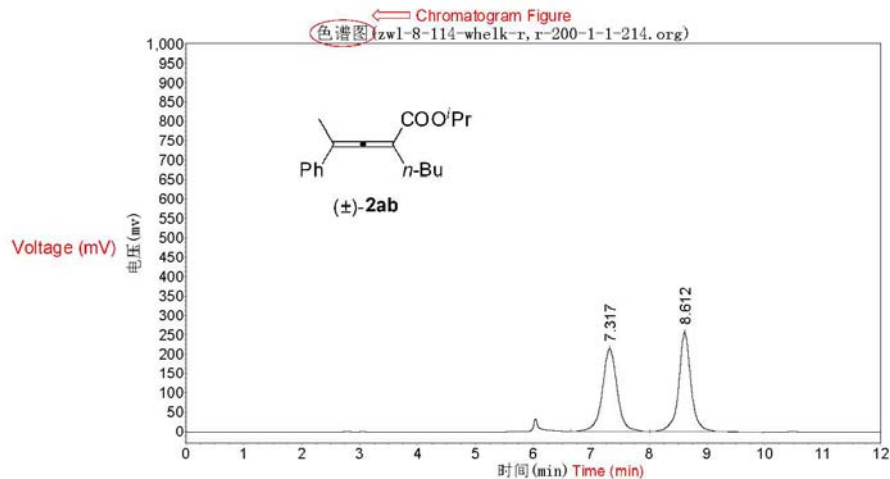

分析结果表

| 峰号(Peak No.) | 峰名(Peak name) | 保留时间(Retention time) | 峰高(Peak height) | 峰面积(Peak area) | 含量(Content) |
|--------------|---------------|----------------------|-----------------|----------------|-------------|
| 1            |               | 7.317                | 212267.281      | 3824037.000    | 50.0884     |
| 2            |               | 8.612                | 255875.906      | 3810538.000    | 49.9116     |
| 总计           |               |                      | 468143.188      | 7634575.000    | 100.0000    |

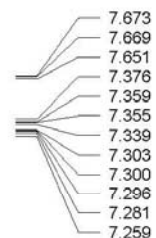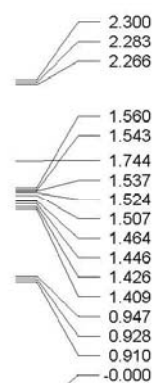

zwf-11-19-2-H  
Jan 3 2018  
SOLVENT: cdcl3  
NA = 4  
F1 = 399.749542 MHz  
F2 = 100.526031 MHz

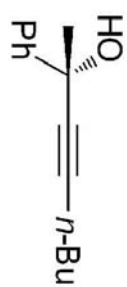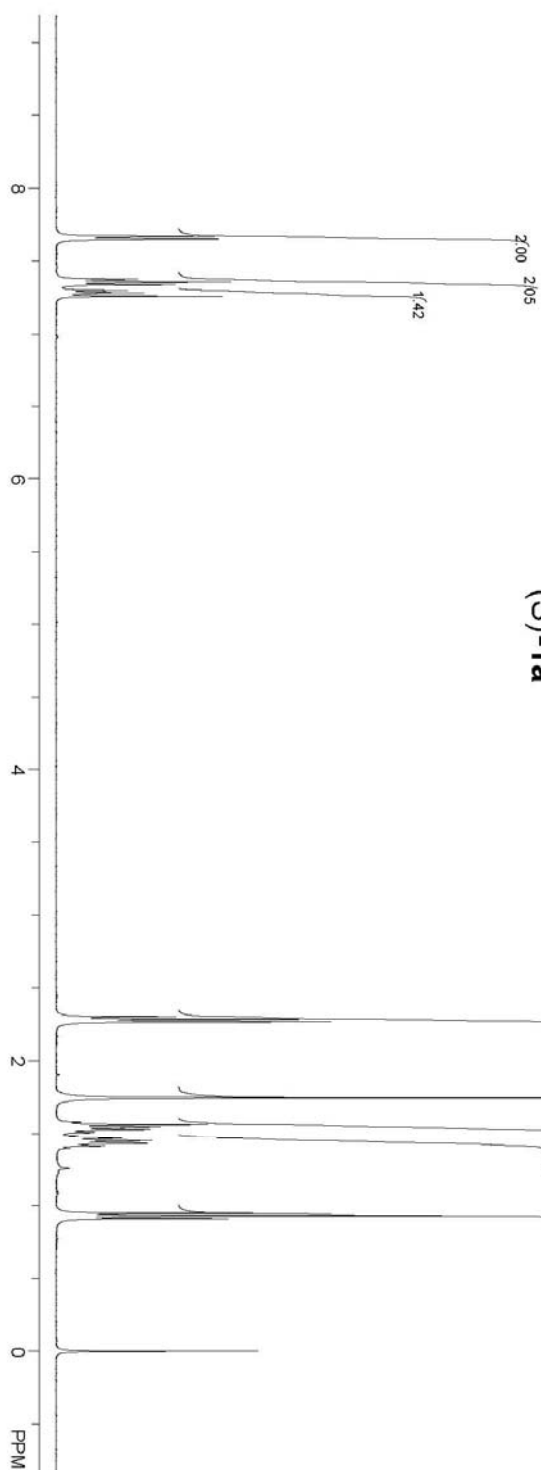

## zw1-11-19-2

实验时间: 2018-01-03, 16:36:32

报告时间: 2018-01-03, 17:03:14

谱图文件: E:\data\zw1\zw1-11-19-2-wheelk-s, s-200-1-1-214. org

方法文件: E:\data\zw1\zw1. mtd

Brief introduction of experimental conditions

实验内容简介:

zw1-11-19-2-wheelk-s, s-200-1-1-214

Chromatogram Figure

色谱图 (zw1-11-19-2-wheelk-s, s-200-1-1-214. org)

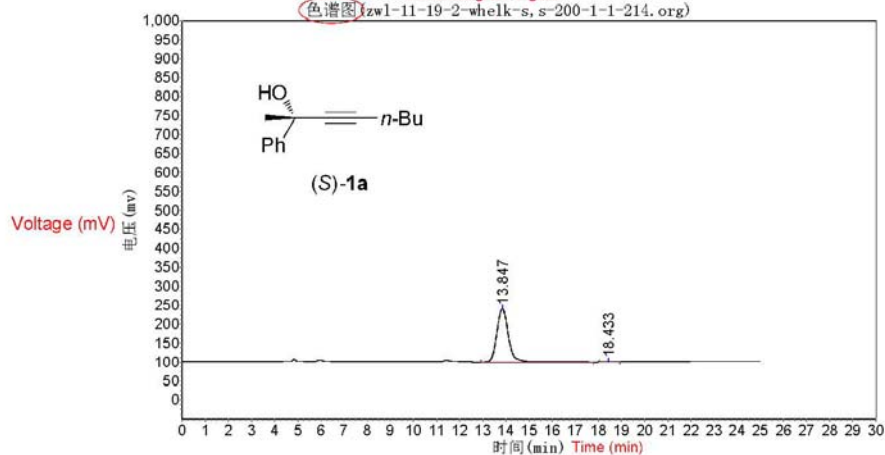

分析结果表

| 峰号 (Peak No.) | 峰名 (Peak name) | 保留时间 (Retention time) | 峰高 (Peak height) | 峰面积 (Peak area) | 含量 (Content) |
|---------------|----------------|-----------------------|------------------|-----------------|--------------|
| 1             |                | 13.847                | 139892.453       | 4895737.500     | 99.7662      |
| 2             |                | 18.433                | 423.490          | 11471.078       | 0.2338       |
| 总计            |                |                       | 140315.943       | 4907208.578     | 100.0000     |

## zw1-10-177

实验时间: 2018-01-03, 14:58:04

报告时间: 2018-01-03, 15:56:13

谱图文件: E:\data\zw1\zw1-10-177-wheelk-s, s-200-1-1-214-

18.1.3.org

方法文件: E:\data\zw1\zw1.mtd

实验内容简介: Brief introduction of experimental conditions

zw1-10-177-wheelk-s, s-200-1-1-214

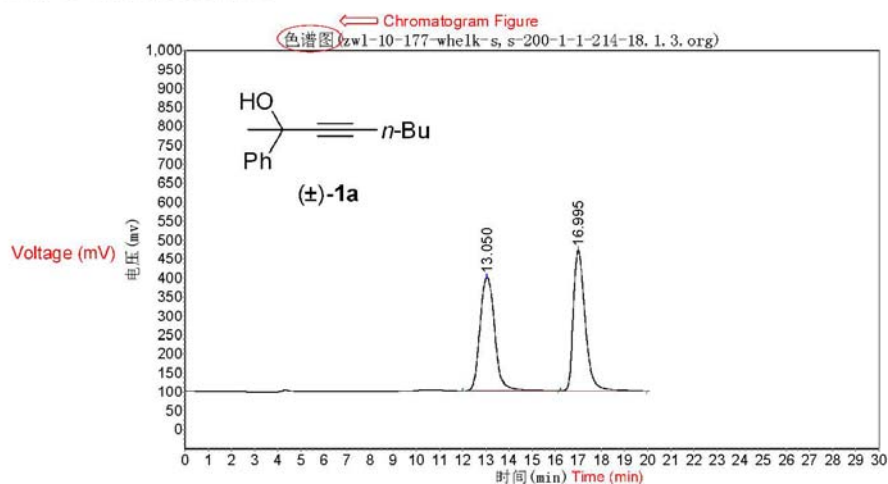

分析结果表

| 峰号 (Peak No.) | 峰名 (Peak name) | 保留时间 (Retention time) | 峰高 (Peak height) | 峰面积 (Peak area) | 含量 (Content) |
|---------------|----------------|-----------------------|------------------|-----------------|--------------|
| 1             |                | 13.050                | 298480.719       | 13337632.000    | 50.2526      |
| 2             |                | 16.995                | 370224.250       | 13203545.000    | 49.7474      |
| 总计            |                |                       | 668704.969       | 26541177.000    | 100.0000     |

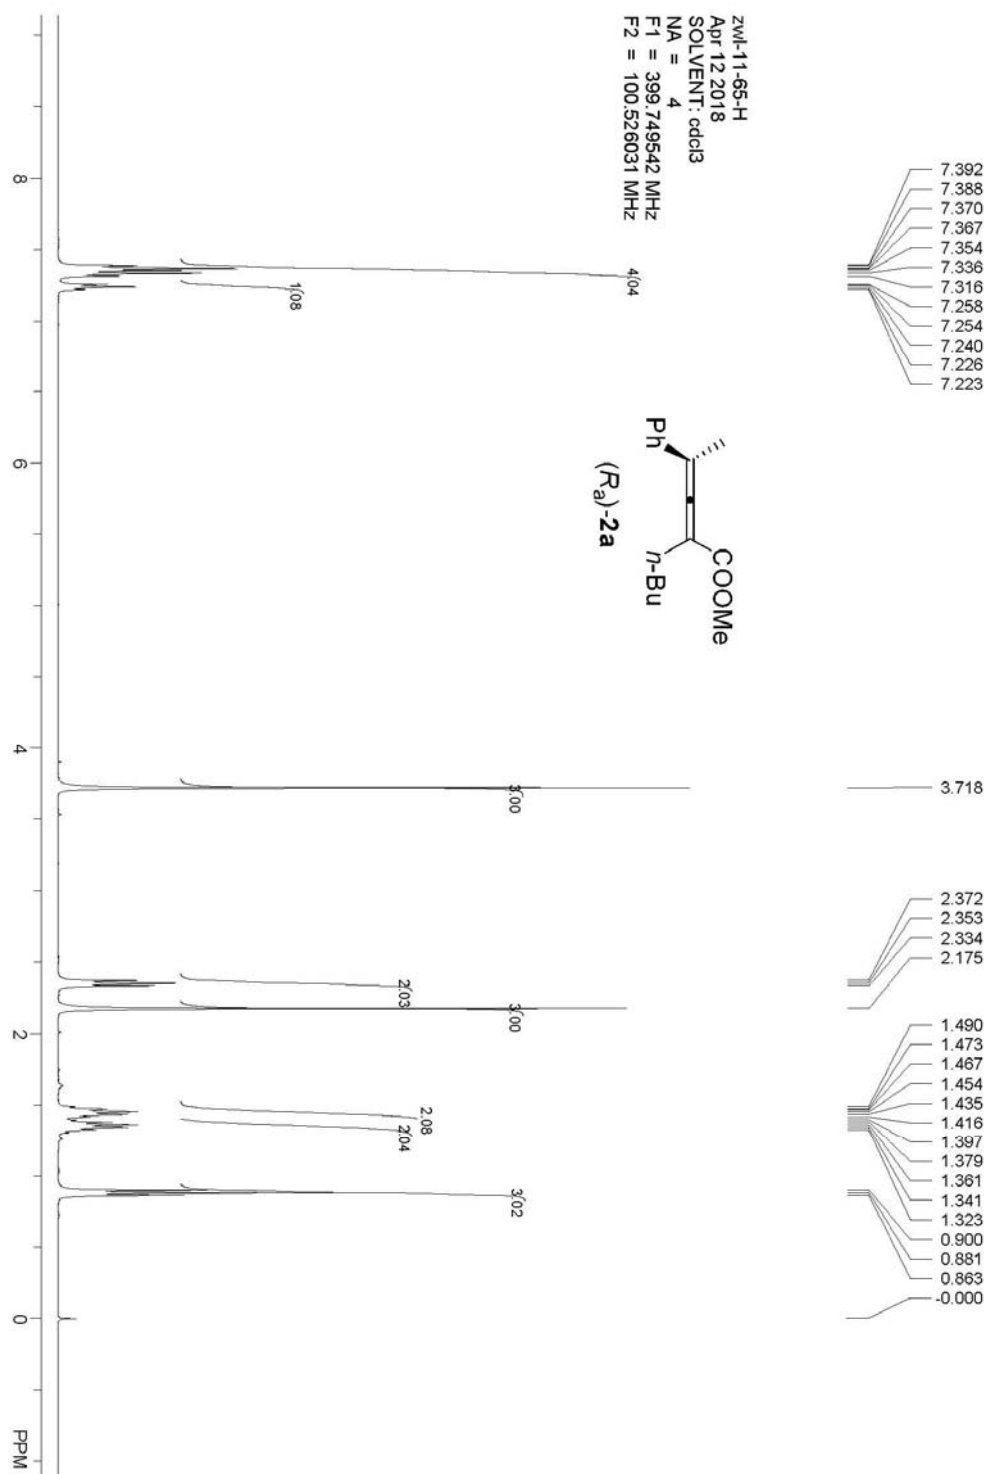

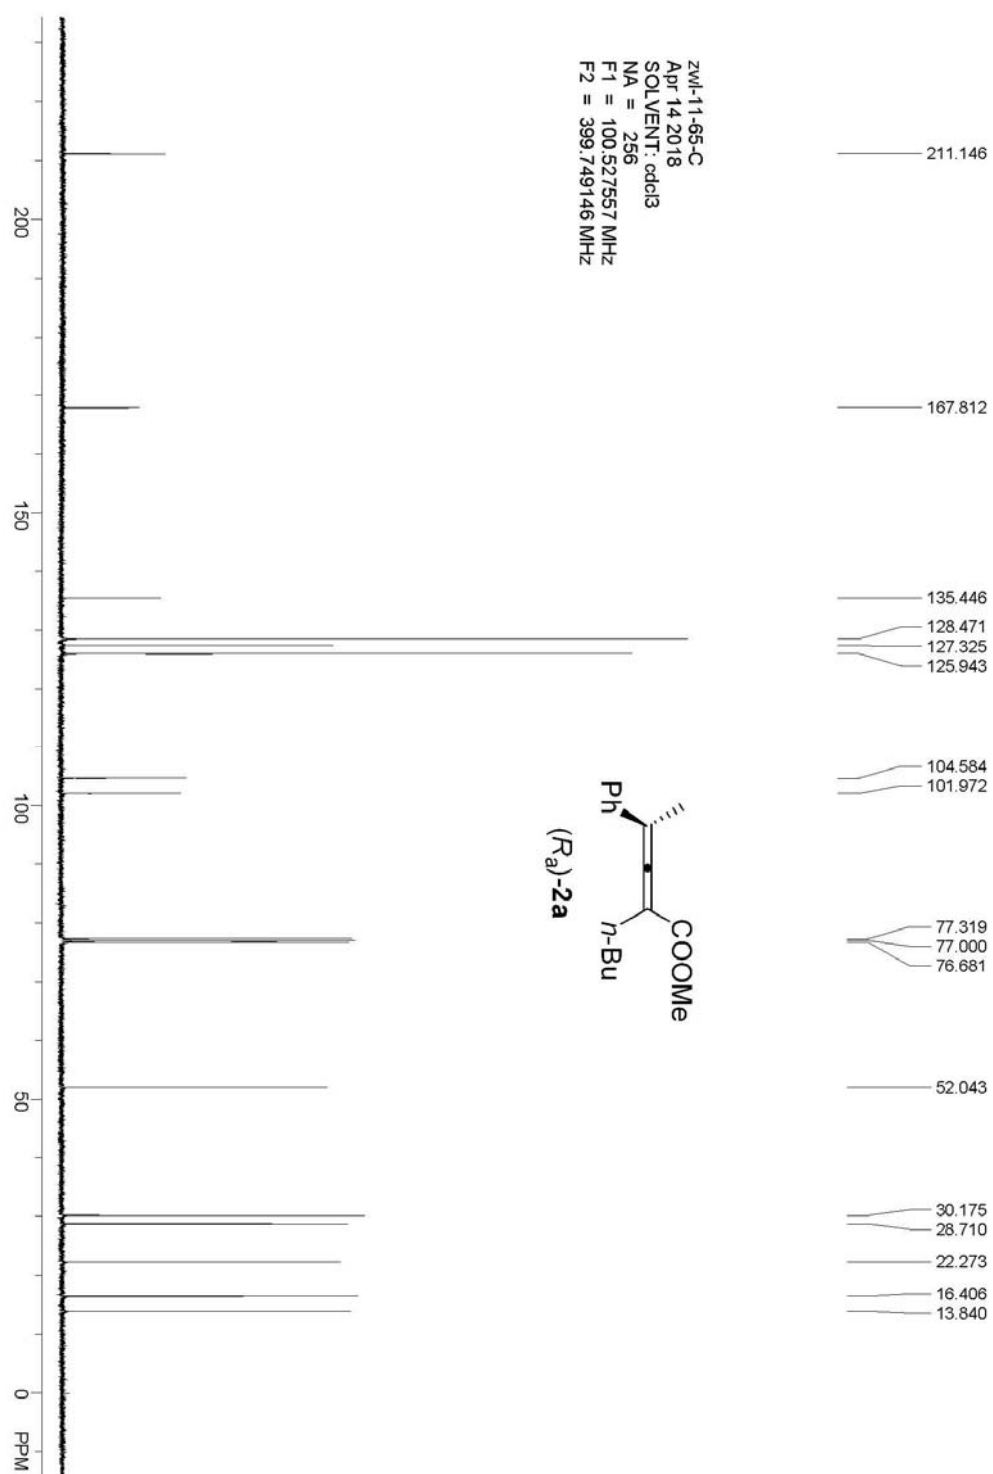

# zw1-11-65

实验时间: 2018-04-12, 17:48:02  
报告时间: 2018-04-12, 18:02:52  
谱图文件: E:\data\zw1\zw1-11-65-wheelk-s, s-200-1-1-214-18.4.12.org

实验内容简介: zw1-11-65-wheelk-s, s-200-1-1-214

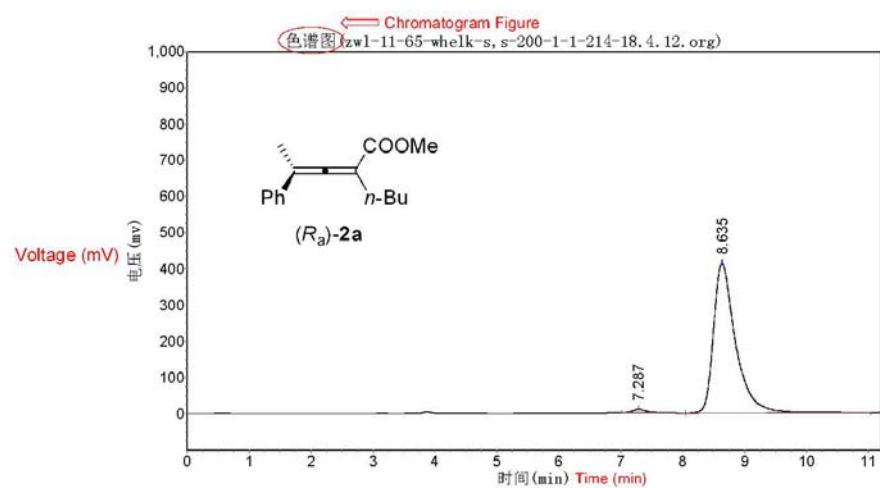

分析结果表

| 峰号 (Peak No.) | 峰名 (Peak name) | 保留时间 (Retention time) | 峰高 (Peak height) | 峰面积 (Peak area) | 含量 (Content) |
|---------------|----------------|-----------------------|------------------|-----------------|--------------|
| 1             |                | 7.287                 | 9732.876         | 158619.156      | 1.5224       |
| 2             |                | 8.635                 | 412723.813       | 10260651.000    | 98.4776      |
| 总计            |                |                       | 422456.688       | 10419270.156    | 100.0000     |

## zw1-9-139

实验时间: 2018-04-12, 18:50:54  
谱图文件: E:\data\zw1\zw1-9-139-whelk-s, s-200-1-1-214-18.4.12.org

报告时间: 2018-04-12, 19:03:18

实验内容简介: zw1-9-139-whelk-s, s-200-1-1-214

Brief introduction of experimental conditions

色谱图 (zw1-9-139-whelk-s, s-200-1-1-214-18.4.12.org)

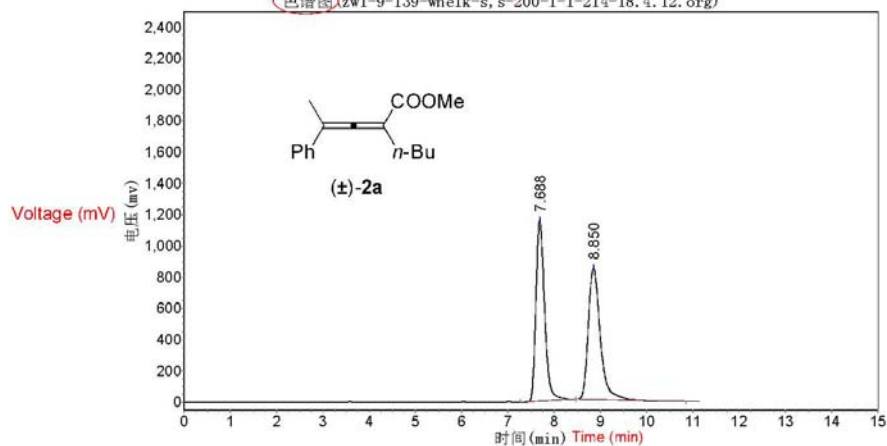

分析结果表

| 峰号 (Peak No.) | 峰名 (Peak name) | 保留时间 (Retention time) | 峰高 (Peak height) | 峰面积 (Peak area) | 含量 (Content) |
|---------------|----------------|-----------------------|------------------|-----------------|--------------|
| 1             |                | 7.688                 | 1155792.375      | 15057648.000    | 49.6680      |
| 2             |                | 8.850                 | 841111.750       | 15258977.000    | 50.3320      |
| 总计            |                |                       | 1996904.125      | 30316625.000    | 100.0000     |

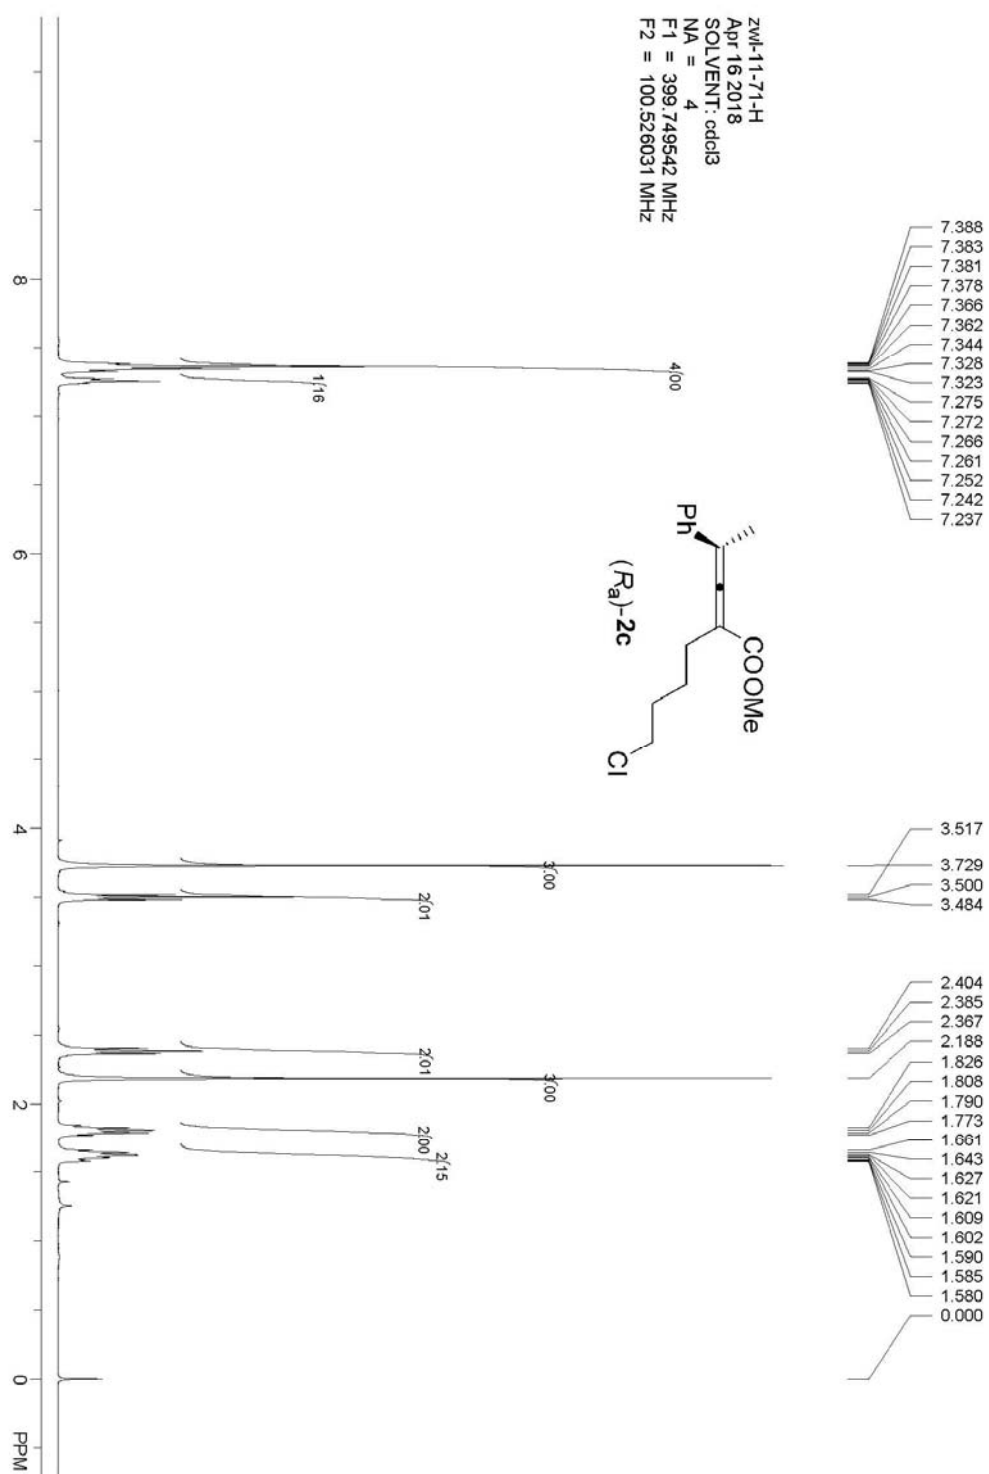

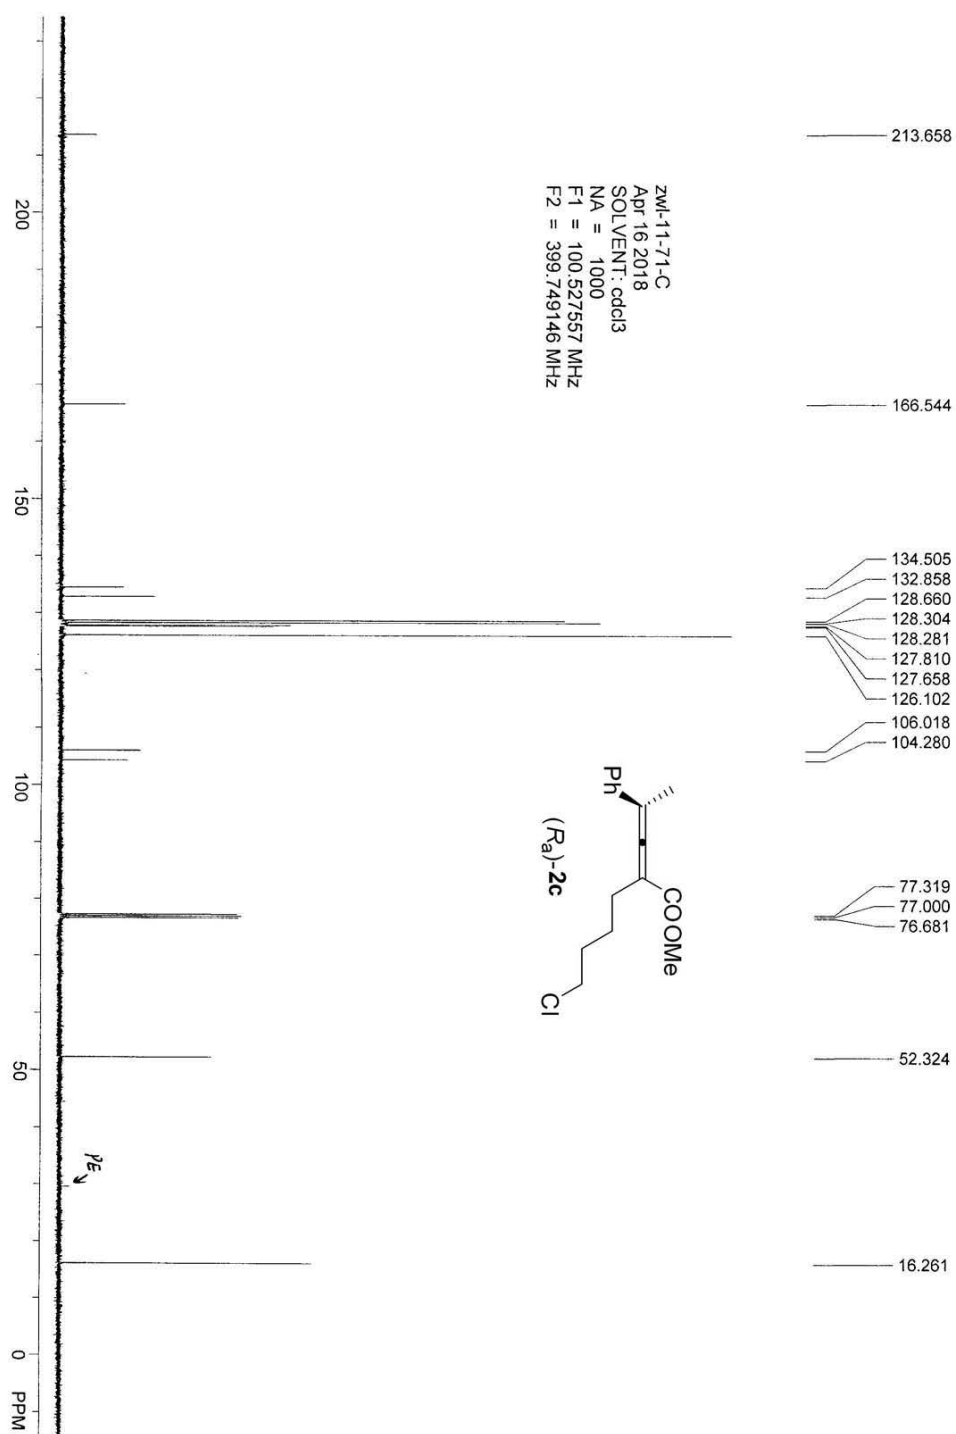

## zw1-11-71

实验时间: 2018-04-16, 21:55:07  
谱图文件: E:\data\zw1\zw1-11-71-whelk-s, s-100-1-1-214-  
18.4.16-1.org  
方法文件: E:\data\yaoyuan\0414.mtd

报告时间: 2018-04-17, 18:08:59

实验内容简介: Brief introduction of experimental conditions

zw1-11-71-whelk-s, s-100-1-1-214

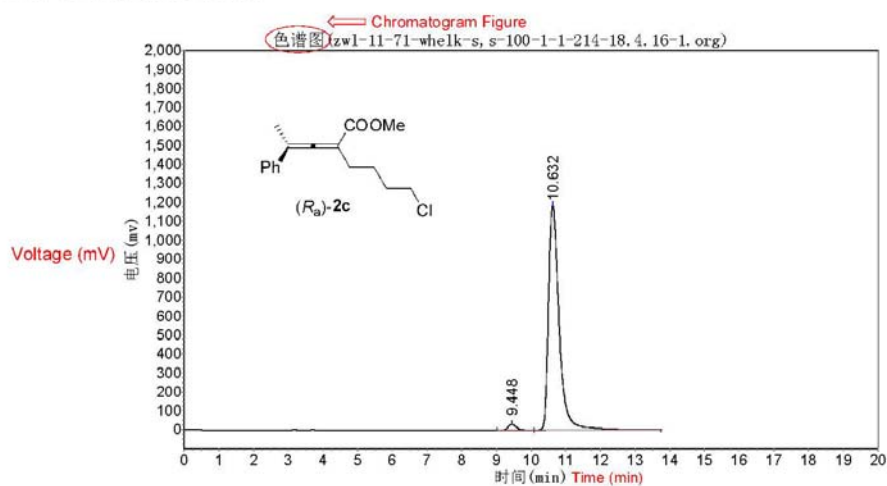

分析结果表

| 峰号 (Peak No.) | 峰名 (Peak name) | 保留时间 (Retention time) | 峰高 (Peak height) | 峰面积 (Peak area) | 含量 (Content) |
|---------------|----------------|-----------------------|------------------|-----------------|--------------|
| 1             |                | 9.448                 | 30770.469        | 534250.500      | 2.0541       |
| 2             |                | 10.632                | 1185332.625      | 25474468.000    | 97.9459      |
| 总计            |                |                       | 1216103.094      | 26008718.500    | 100.0000     |

## zw1-8-145

实验时间: 2018-04-16, 21:11:37  
谱图文件: E:\data\zw1\zw1-8-145-whelk-s, s-100-1-1-214-  
18.4.16.org  
方法文件: E:\data\yaoyuan\0414.mtd

报告时间: 2018-04-17, 18:08:23

实验内容简介: Brief introduction of experimental conditions

zw1-8-145-whelk-s, s-100-1-1-214

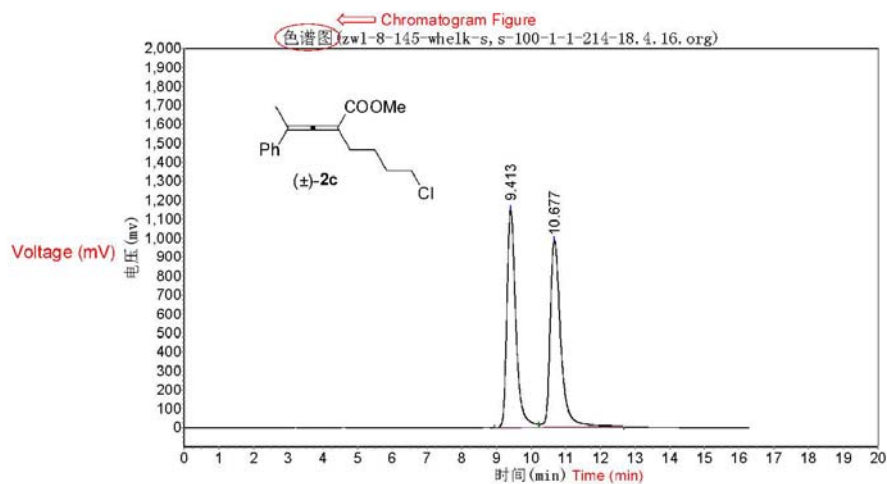

分析结果表

| 峰号 (Peak No.) | 峰名 (Peak name) | 保留时间 (Retention time) | 峰高 (Peak height) | 峰面积 (Peak area) | 含量 (Content) |
|---------------|----------------|-----------------------|------------------|-----------------|--------------|
| 1             |                | 9.413                 | 1151041.125      | 20616230.000    | 49.6995      |
| 2             |                | 10.677                | 985227.375       | 20865558.000    | 50.3005      |
| 总计            |                |                       | 2136268.500      | 41481788.000    | 100.0000     |

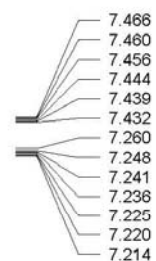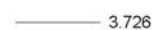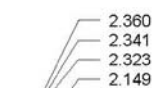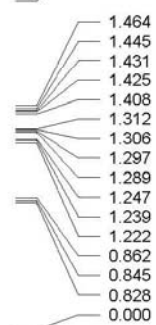

zw/-11-73-H  
Apr 18 2018  
SOLVENT: cdcl3  
NA = 8  
F1 = 399.749542 MHz  
F2 = 100.526031 MHz

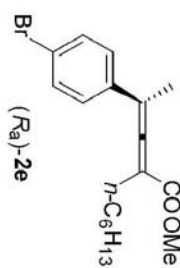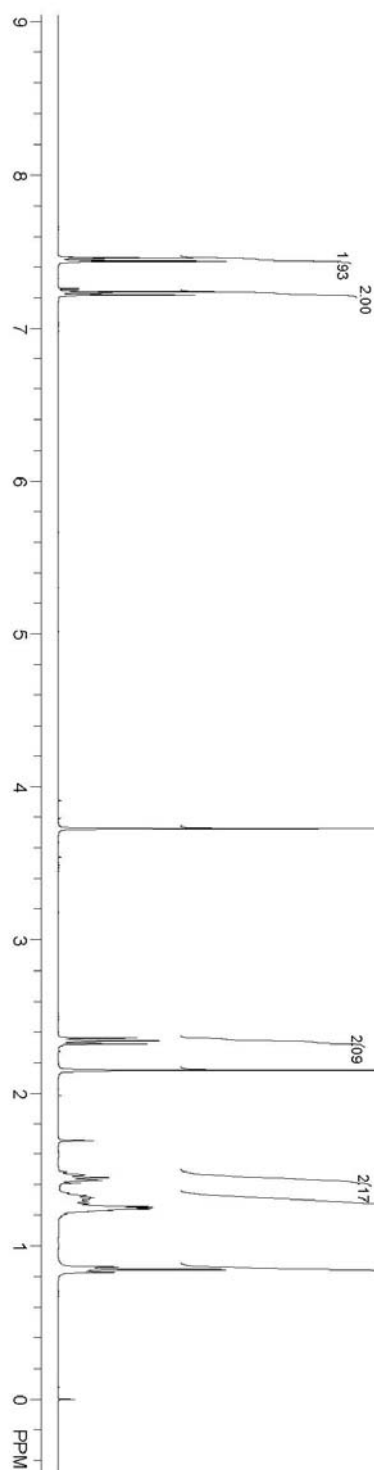

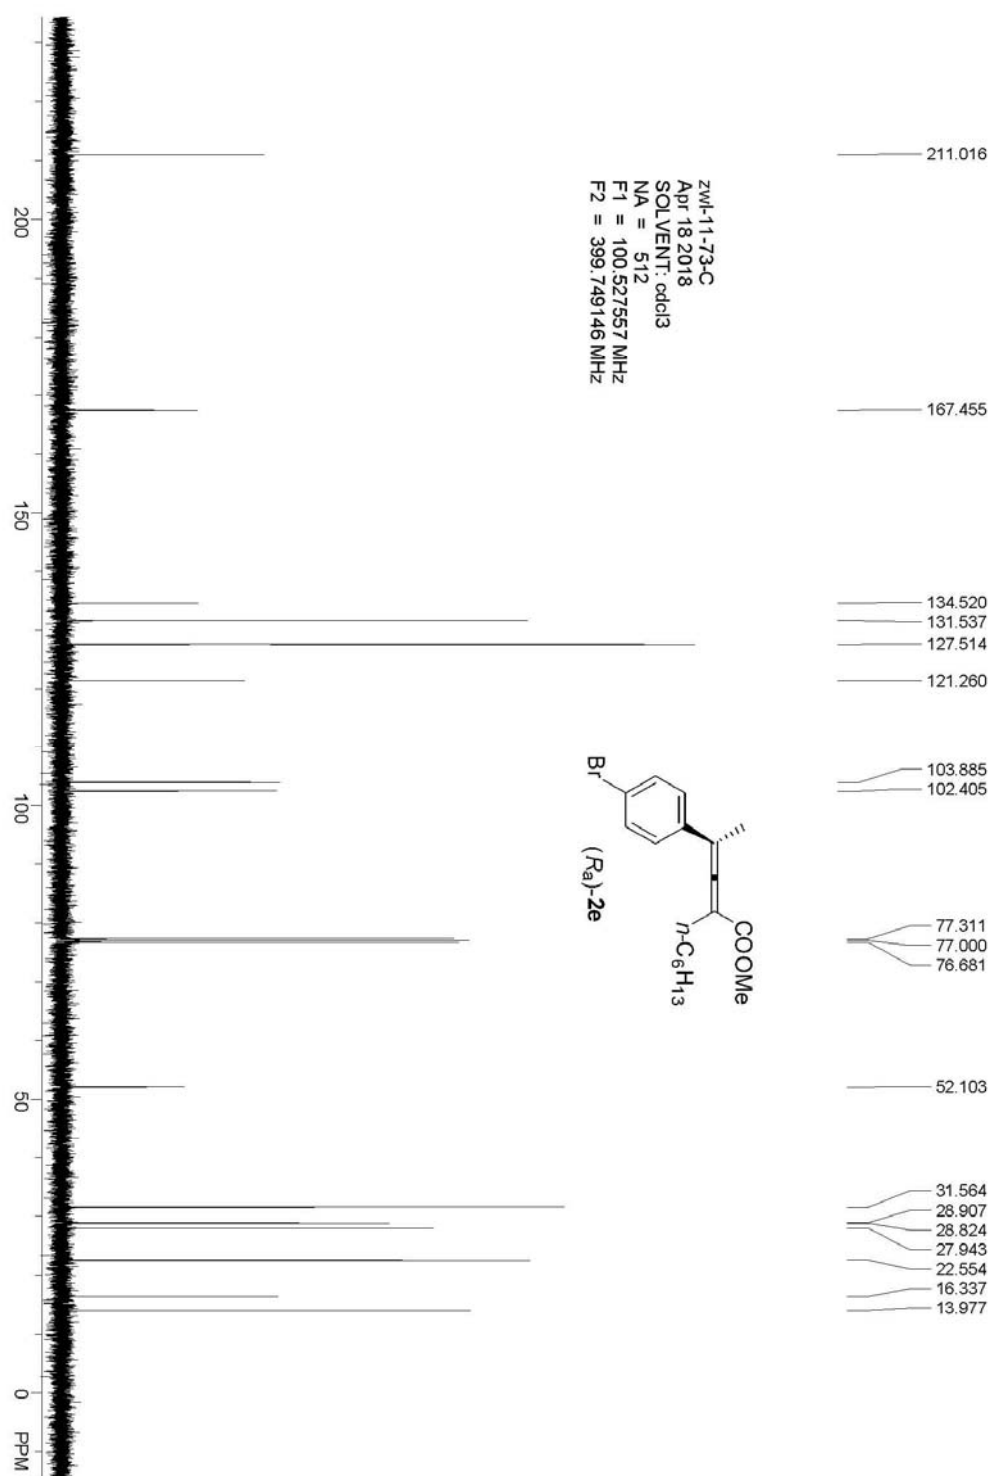

## zw1-11-73

实验时间: 2018-04-17, 17:03:47  
谱图文件: E:\data\zw1\zw1-11-73-wheelk-s, s, -200-1-1-214-  
18.4.17-1.org  
方法文件: E:\data\yaoyuan\0414.mtd

报告时间: 2018-04-19, 20:42:18

实验内容简介: Brief introduction of experimental conditions

zw1-11-73-wheelk-s, s-200-1-1-214

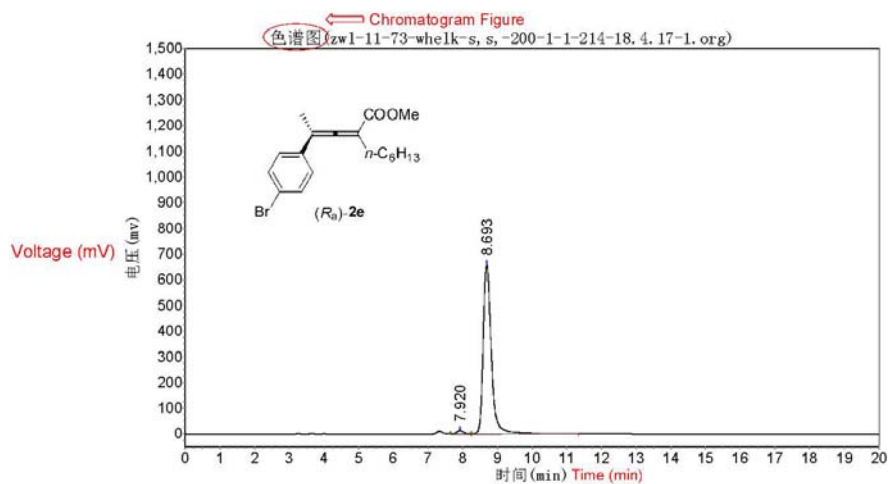

分析结果表

| 峰号 (Peak No.) | 峰名 (Peak name) | 保留时间 (Retention time) | 峰高 (Peak height) | 峰面积 (Peak area) | 含量 (Content) |
|---------------|----------------|-----------------------|------------------|-----------------|--------------|
| 1             |                | 7.920                 | 13356.616        | 191971.297      | 1.7227       |
| 2             |                | 8.693                 | 660292.250       | 10951710.000    | 98.2773      |
| 总计            |                |                       | 673648.866       | 11143681.297    | 100.0000     |

## zw1-8-200

实验时间: 2018-04-17, 16:10:49  
谱图文件: E:\data\zw1\zw1-8-200-wheelk-s, s, -200-1-1-214-  
18.4.17.org  
方法文件: E:\data\yaoyuan\0414.mtd

报告时间: 2018-04-17, 16:26:10

实验内容简介: Brief introduction of experimental conditions

zw1-8-200-wheelk-s, s-200-1-1-214

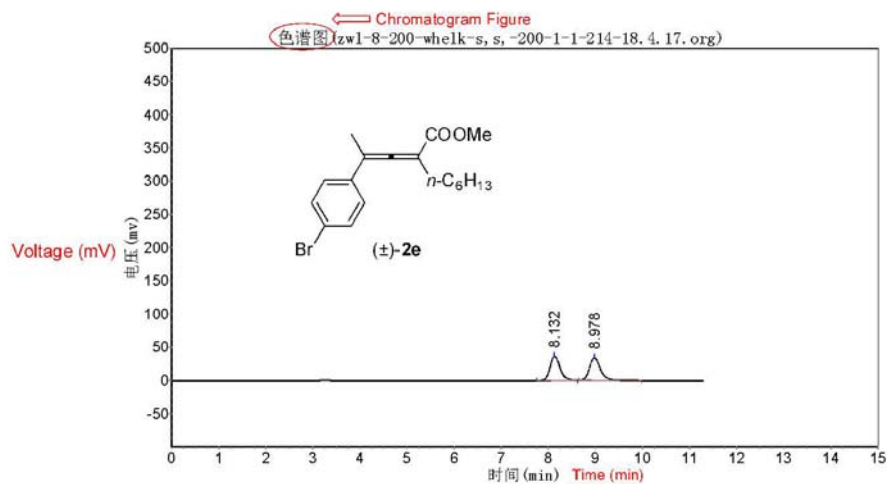

分析结果表

| 峰号 (Peak No.) | 峰名 (Peak name) | 保留时间 (Retention time) | 峰高 (Peak height) | 峰面积 (Peak area) | 含量 (Content) |
|---------------|----------------|-----------------------|------------------|-----------------|--------------|
| 1             |                | 8.132                 | 36212.492        | 533018.250      | 49.8637      |
| 2             |                | 8.978                 | 33533.133        | 535932.188      | 50.1363      |
| 总计            |                |                       | 69745.625        | 1068950.438     | 100.0000     |

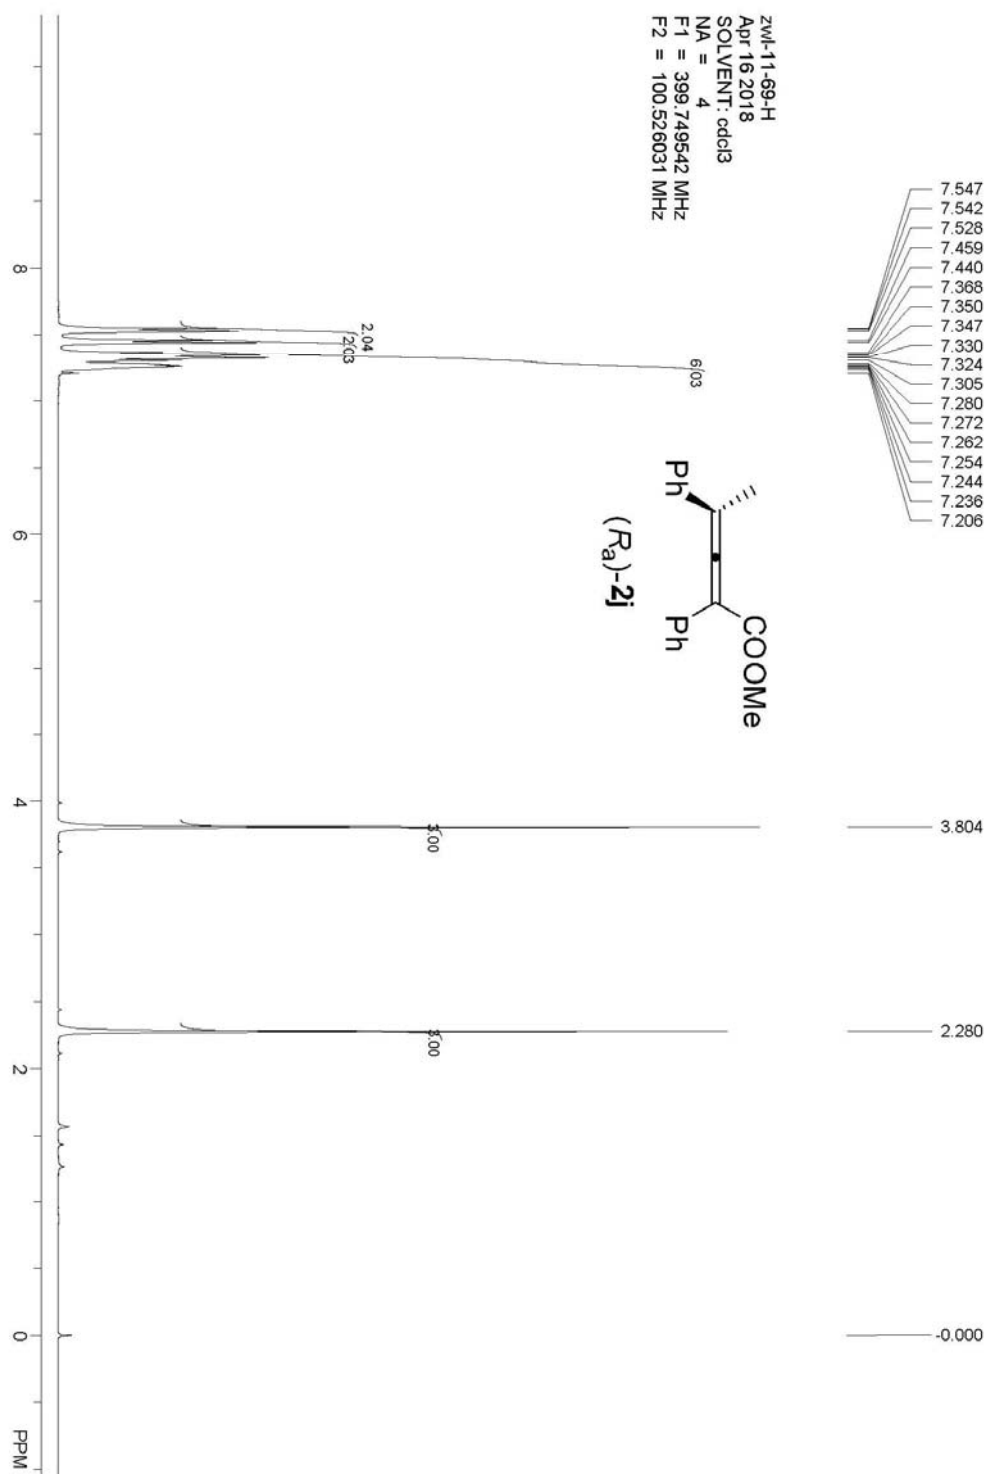

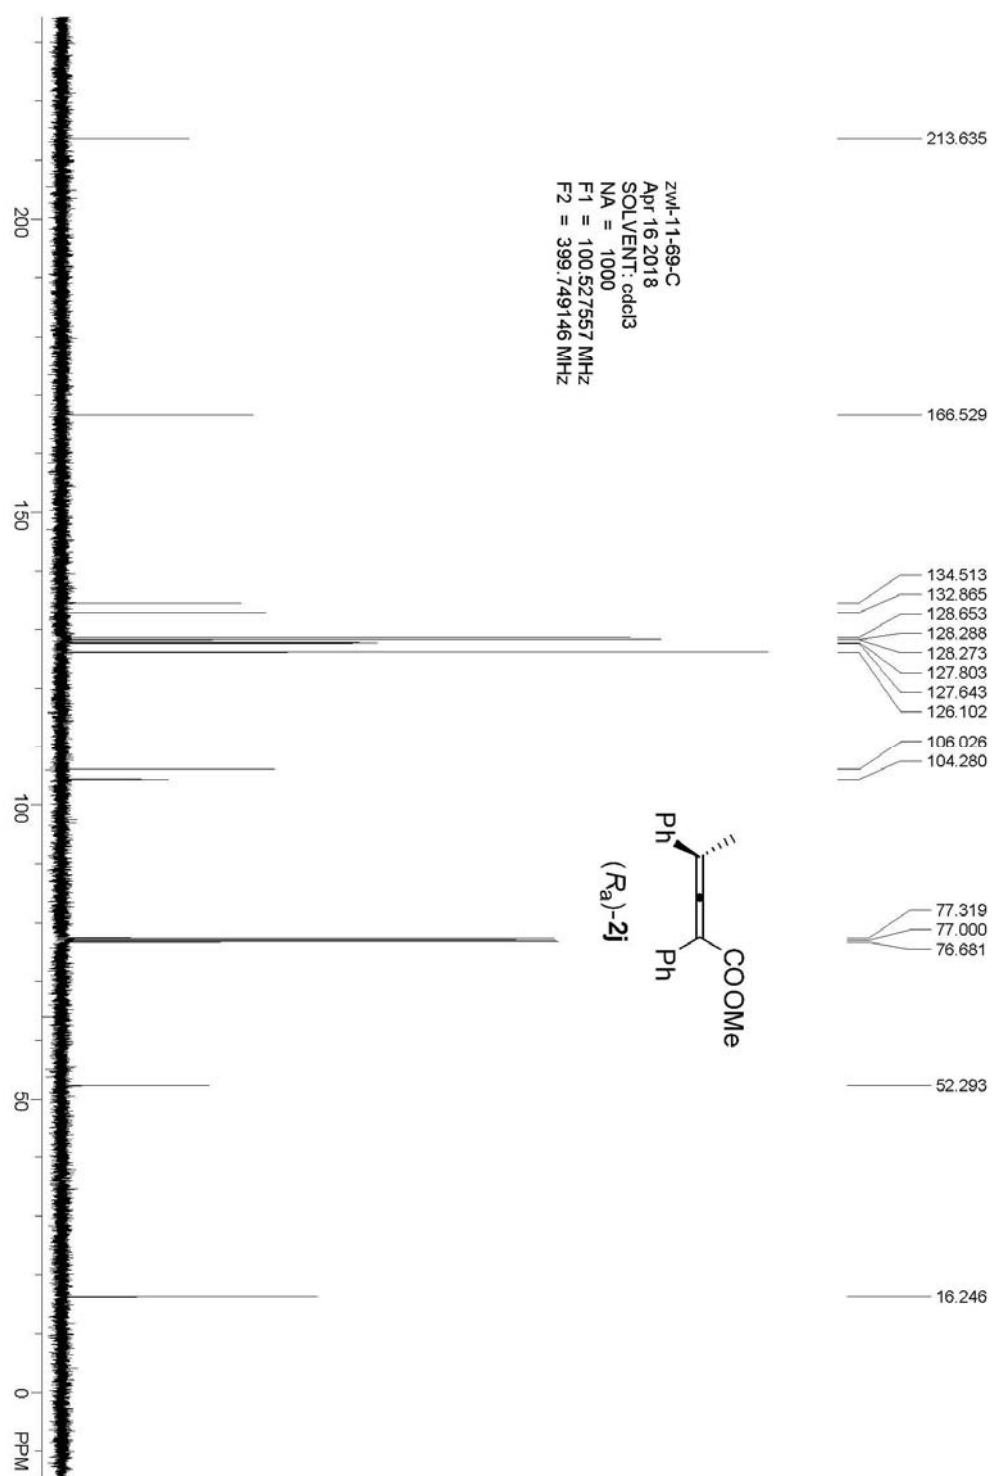

## SAMPLE INFORMATION

|                   |                           |                  |                        |
|-------------------|---------------------------|------------------|------------------------|
| Sample Name:      | zw-11-69-pc-2-100-1-1-214 | Acquired By:     | Breeze                 |
| Sample Type:      | 未知                        | Date Acquired:   | 2018/4/17 19:43:56 CST |
| Vial:             | 999                       | Acq. Method:     | zgj1001                |
| Injection#:       | 71                        | Date Processed:  | 2018/4/17 20:45:04 CST |
| Injection Volume: | 10.00 $\mu$ l             | Channel Name:    | V2489 ChA              |
| Run Time:         | 15.00 Minutes             | Channel Desc.:   | V2489 ChA 230nm        |
| Column Type:      |                           | Sample Set Name: |                        |

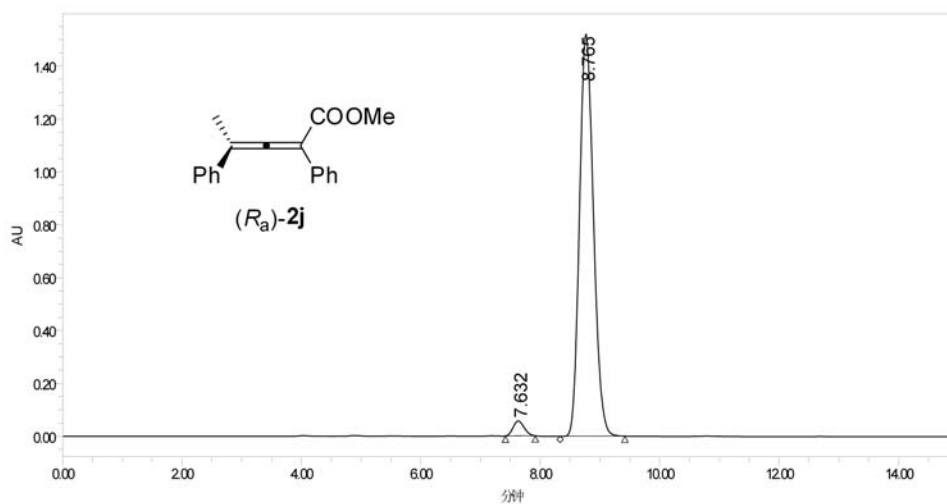

|   | RT<br>(min) | Area<br>(AU#sec) | %Area | Height<br>(AU) | %<br>Height |
|---|-------------|------------------|-------|----------------|-------------|
| 1 | 7.632       | 717405           | 2.82  | 55441          | 3.58        |
| 2 | 8.766       | 24751422         | 97.18 | 1520022        | 96.42       |

## SAMPLE INFORMATION

|                   |                           |                  |                        |
|-------------------|---------------------------|------------------|------------------------|
| Sample Name:      | zw-7-135-pc-2-100-1-1-214 | Acquired By:     | Breeze                 |
| Sample Type:      | 未知                        | Date Acquired:   | 2018/4/17 18:59:03 CST |
| Vial:             | 999                       | Acq. Method:     | zgj1001                |
| Injection#:       | 69                        | Date Processed:  | 2018/4/17 20:44:39 CST |
| Injection Volume: | 10.00 $\mu$ l             | Channel Name:    | V2489 ChA              |
| Run Time:         | 15.00 Minutes             | Channel Desc.:   | V2489 ChA 230nm        |
| Column Type:      |                           | Sample Set Name: |                        |

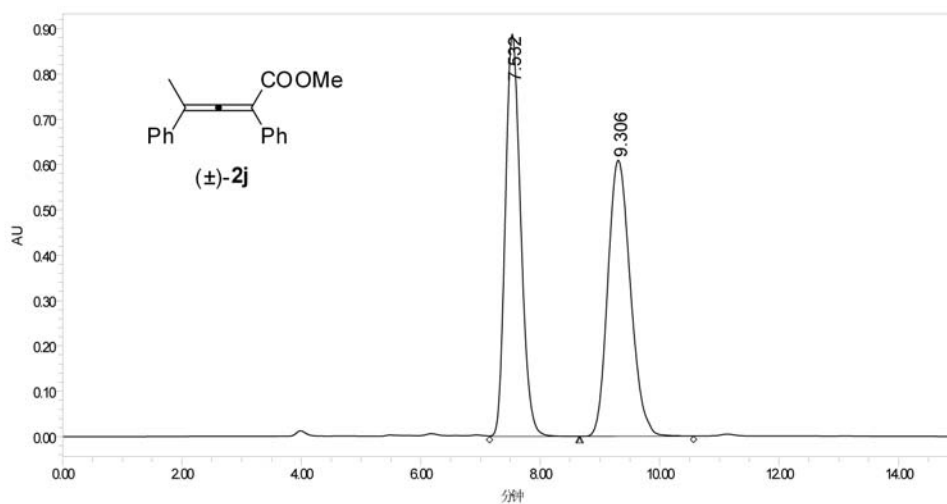

|   | RT<br>(min) | Area<br>(AU*sec) | %Area | Height<br>(AU) | %<br>Height |
|---|-------------|------------------|-------|----------------|-------------|
| 1 | 7.532       | 15876841         | 49.82 | 887215         | 59.25       |
| 2 | 9.306       | 15991546         | 50.18 | 609144         | 40.71       |

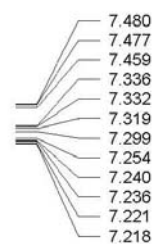

zw/-11-70-H  
Apr 16 2018  
SOLVENT: cdcl3  
NA = 4  
F1 = 399.749542 MHz  
F2 = 100.526031 MHz

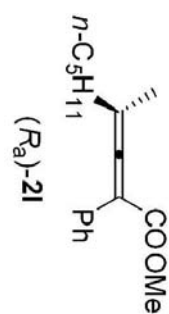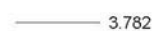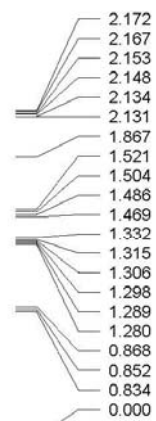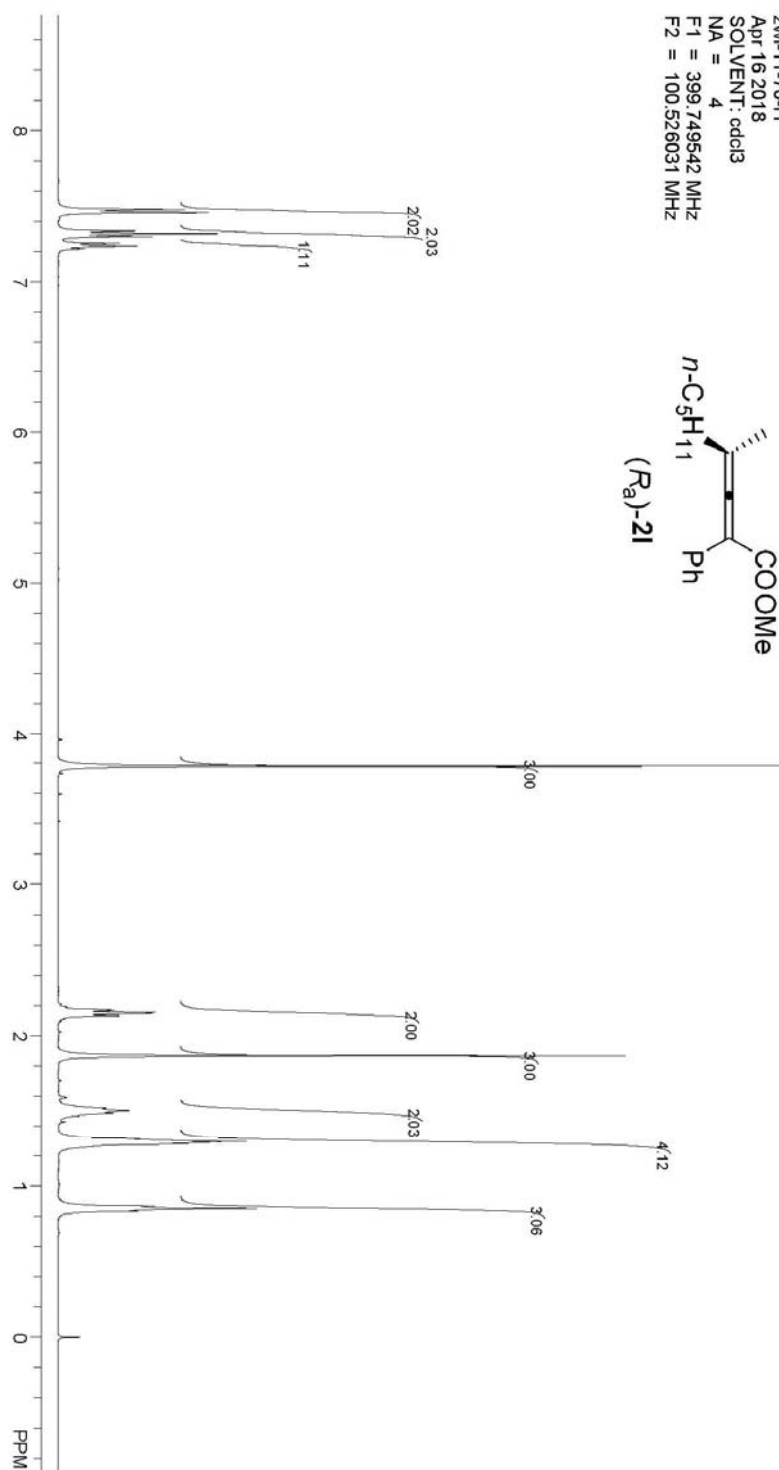

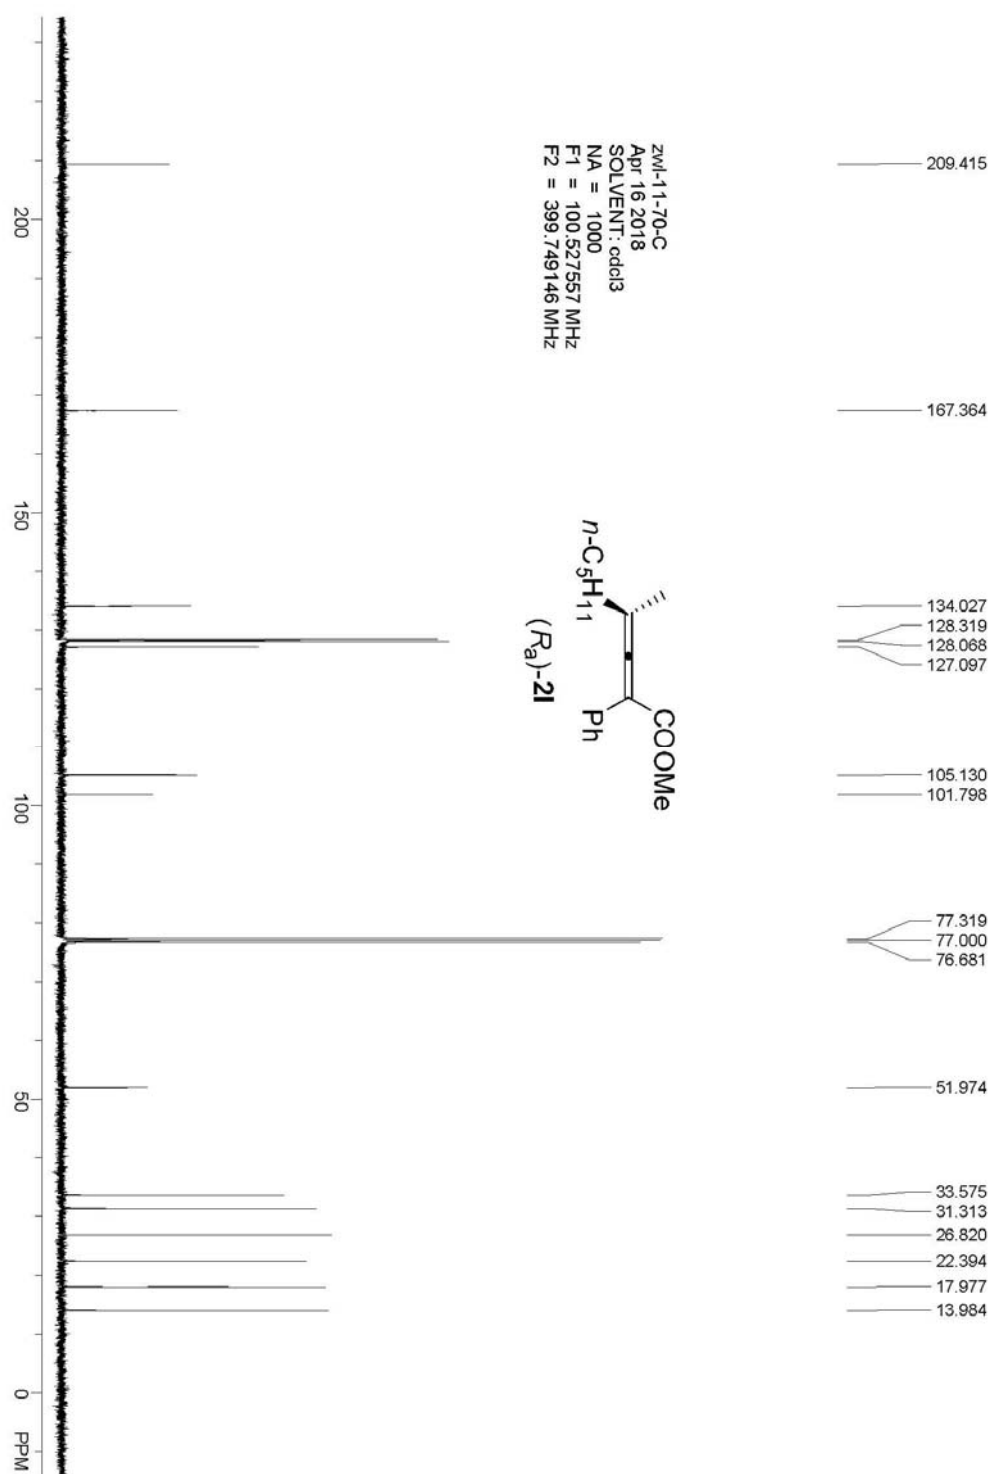

# zw1-11-70

实验时间: 2018-04-16, 20:31:05  
谱图文件: E:\data\zw1\zw1-11-70-whelk-s, s-200-1-1-214-18.4.16-2.org  
方法文件: E:\data\yaoyuan\0414.mtd

报告时间: 2018-04-17, 18:11:30

Brief introduction of experimental conditions

实验内容简介:  
zw1-11-70-whelk-s, s-200-1-1-214

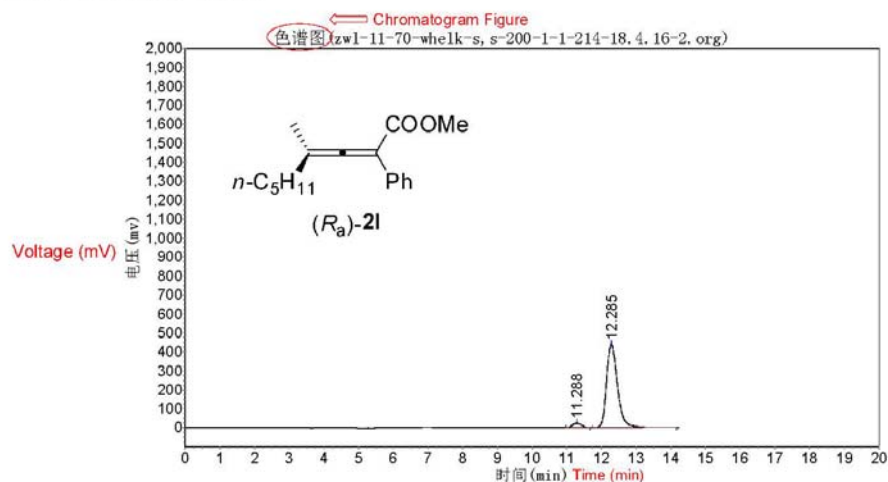

分析结果表

| 峰号 (Peak No.) | 峰名 (Peak name) | 保留时间 (Retention time) | 峰高 (Peak height) | 峰面积 (Peak area) | 含量 (Content) |
|---------------|----------------|-----------------------|------------------|-----------------|--------------|
| 1             |                | 11.288                | 23293.891        | 422110.094      | 4.2103       |
| 2             |                | 12.285                | 438309.594       | 9603543.000     | 95.7897      |
| 总计            |                |                       | 461603.484       | 10025653.094    | 100.0000     |

# zw1-8-147

实验时间: 2018-04-16, 19:28:42 报告时间: 2018-04-20, 15:20:43  
谱图文件:E:\data\zw1\zw1-8-147-whelk-s, s-200-1-1-214-18.4.16-1.org  
方法文件:E:\data\yaoyuan\0414.mtd

Brief introduction of experimental conditions

实验内容简介:  
zw1-8-147-whelk-s, s-200-1-1-214

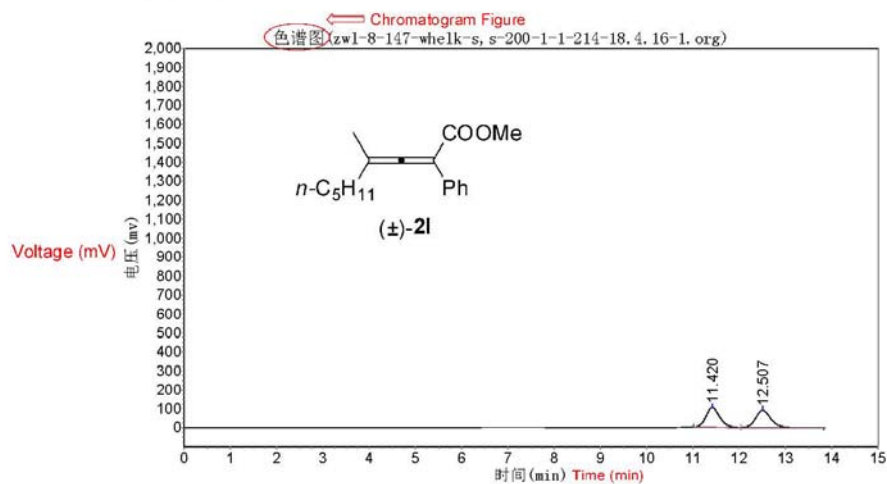

分析结果表

| 峰号 (Peak No.) | 峰名 (Peak name) | 保留时间 (Retention time) | 峰高 (Peak height) | 峰面积 (Peak area) | 含量 (Content) |
|---------------|----------------|-----------------------|------------------|-----------------|--------------|
| 1             |                | 11.420                | 101879.672       | 2118019.500     | 50.0813      |
| 2             |                | 12.507                | 91350.055        | 2111141.750     | 49.9187      |
| 总计            |                |                       | 193229.727       | 4229161.250     | 100.0000     |

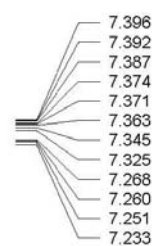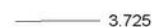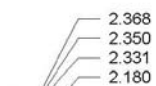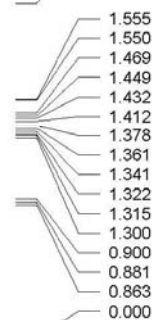

zw/-11-22-H  
Jan 3 2018  
SOLVENT: cdcl3  
NA = 4  
F1 = 399.749542 MHz  
F2 = 100.526031 MHz

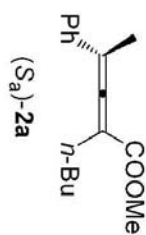

**Schme 2a**

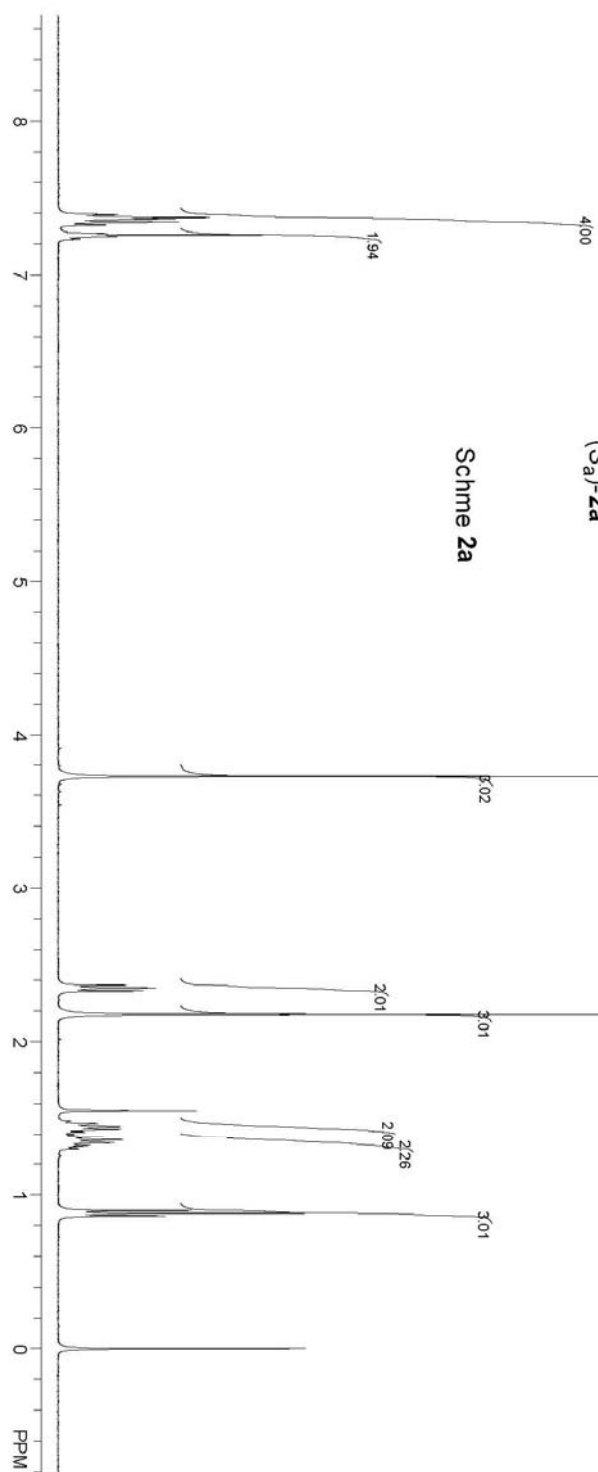

## zw1-11-22

实验时间: 2018-01-03, 11:09:13  
谱图文件: E:\data\zw1\zw1-11-22-wheelk-s, s-200-1-1-214. org  
方法文件: E:\data\zw1\zw1. mtd

报告时间: 2018-01-04, 13:08:31

实验内容简介: Brief introduction of experimental conditions  
zw1-11-22-wheelk-s, s-200-1-1-214

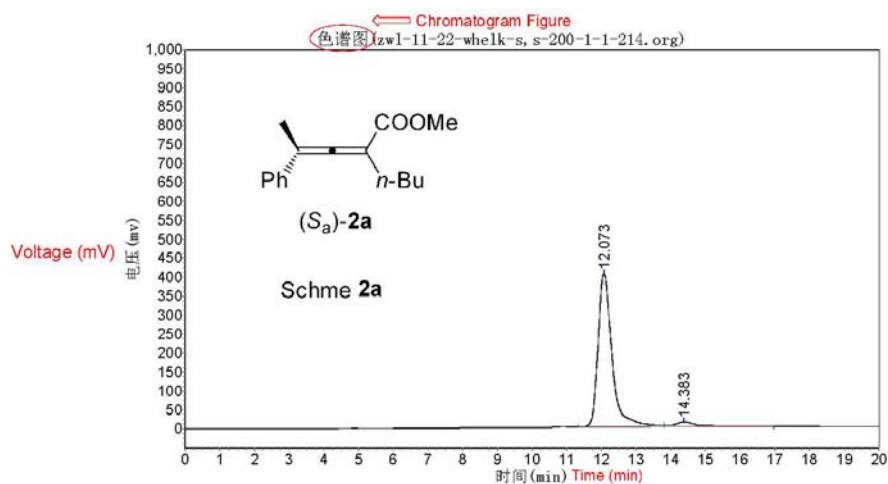

分析结果表

| 峰号 (Peak No.) | 峰名 (Peak name) | 保留时间 (Retention time) | 峰高 (Peak height) | 峰面积 (Peak area) | 含量 (Content) |
|---------------|----------------|-----------------------|------------------|-----------------|--------------|
| 1             |                | 12.073                | 403891.813       | 11379891.000    | 95.2917      |
| 2             |                | 14.383                | 12924.046        | 562267.938      | 4.7083       |
| 总计            |                |                       | 416815.858       | 11942158.938    | 100.0000     |

## zw1-9-139

实验时间: 2018-01-03, 9:32:37  
 谱图文件: E:\data\zw1\zw1-9-139-whelk-s, s-200-1-1-214-  
 18.1.3.org  
 方法文件: E:\data\zw1\zw1.mtd

报告时间: 2018-01-03, 9:54:10

实验内容简介: Brief introduction of experimental conditions

zw1-9-139-whelk-s, s-200-1-1-214

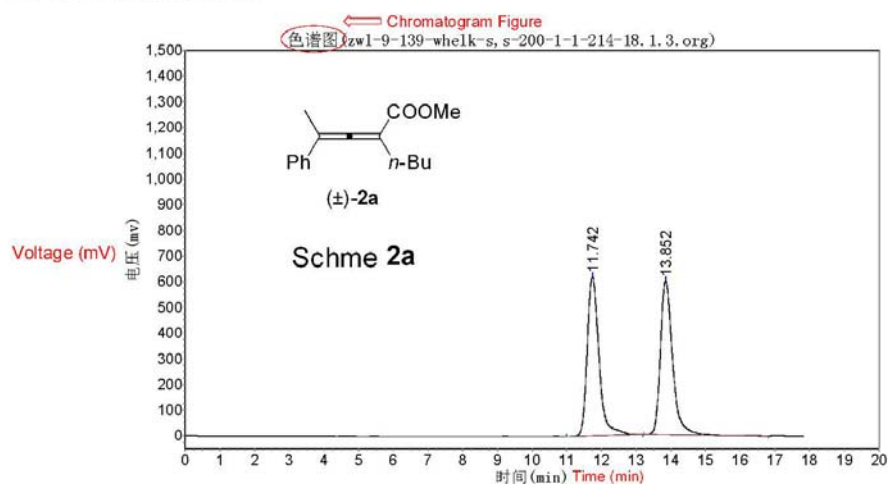

分析结果表

| 峰号 (Peak No.) | 峰名 (Peak name) | 保留时间 (Retention time) | 峰高 (Peak height) | 峰面积 (Peak area) | 含量 (Content) |
|---------------|----------------|-----------------------|------------------|-----------------|--------------|
| 1             |                | 11.742                | 619896.125       | 14716571.000    | 50.0764      |
| 2             |                | 13.852                | 599002.500       | 14671686.000    | 49.9236      |
| 总计            |                |                       | 1218898.625      | 29388257.000    | 100.0000     |

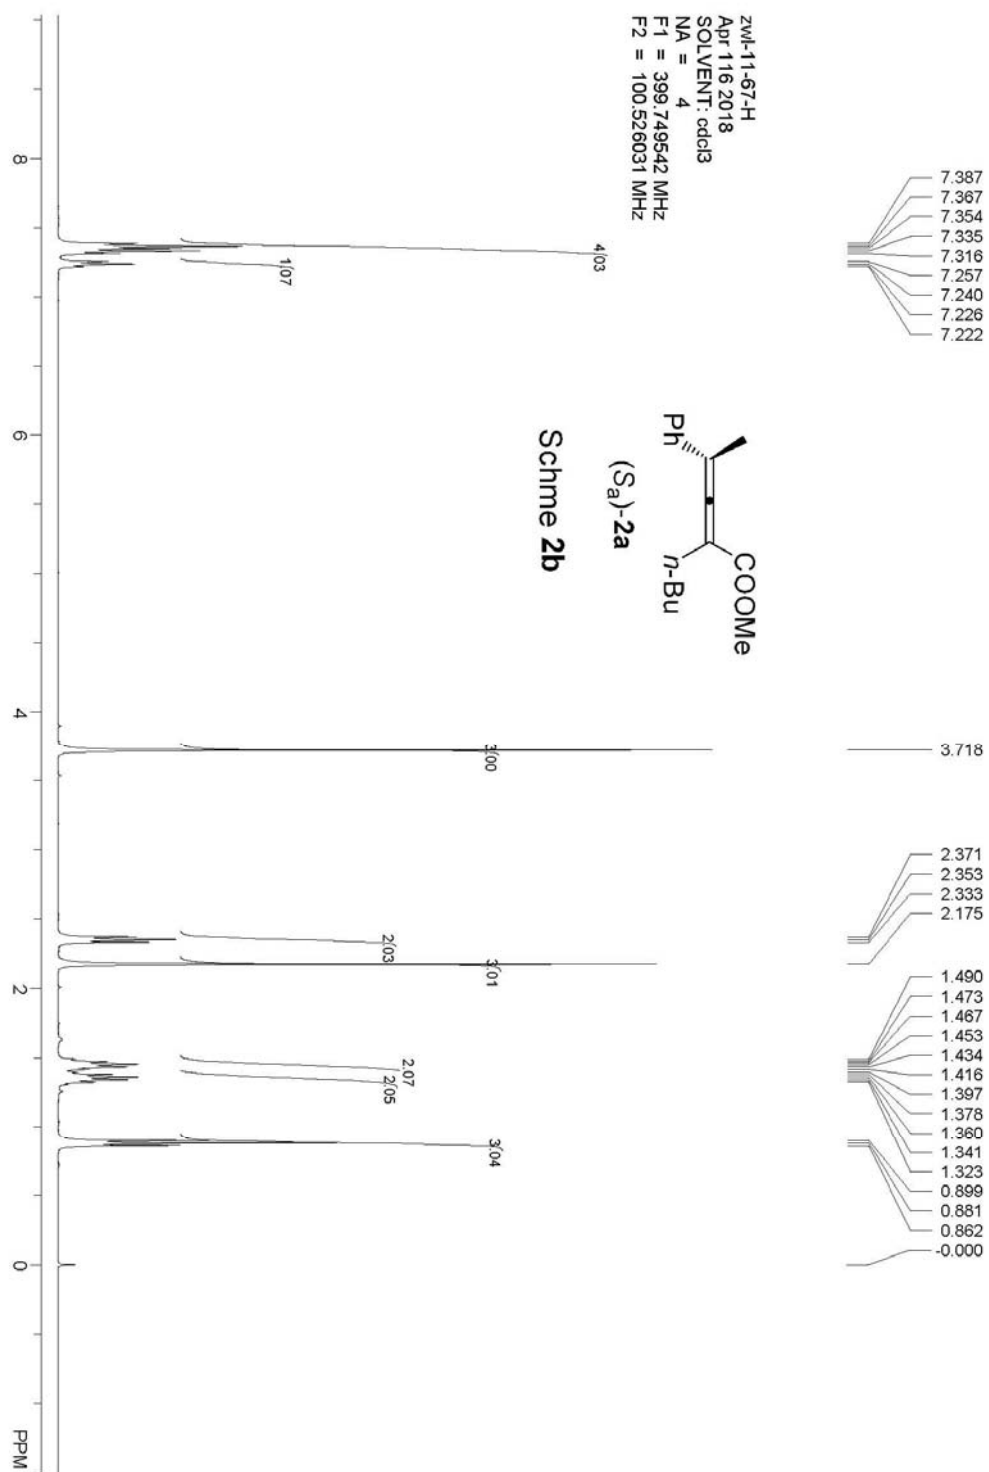

zw1-11-67

实验时间: 2018-04-11, 16:46:54 报告时间: 2018-04-11, 19:28:52  
谱图文件: E:\data\zw1\zw1-11-67-wheelk-s, s-200-1-1-214-18.4.11.org

Brief introduction of experimental conditions  
实验内容简介:  
zw1-11-67-wheelk-s, s-200-1-1-214

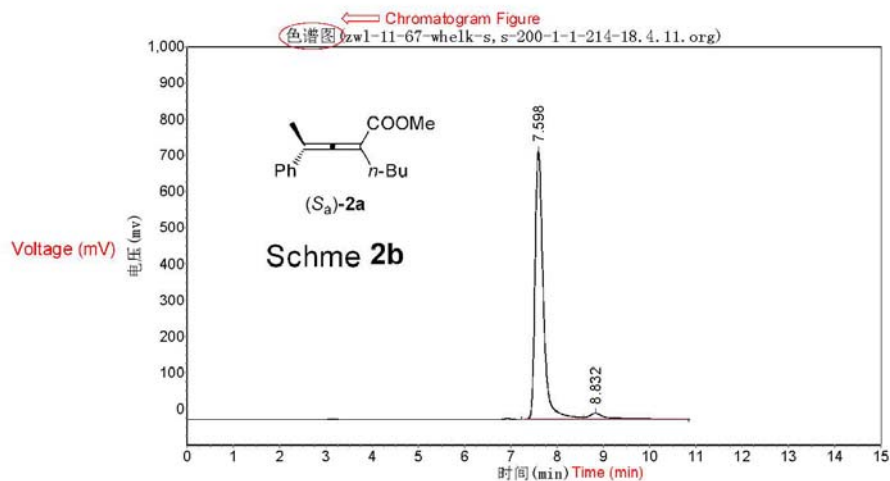

分析结果表

| 峰号(Peak No.) | 峰名(Peak name) | 保留时间(Retention time) | 峰高(Peak height) | 峰面积(Peak area) | 含量(Content) |
|--------------|---------------|----------------------|-----------------|----------------|-------------|
| 1            |               | 7.598                | 741111.063      | 9224980.000    | 95.3200     |
| 2            |               | 8.832                | 16986.834       | 452923.063     | 4.6800      |
| 总计           |               |                      | 758097.896      | 9677903.063    | 100.0000    |

# zw1-9-139

实验时间: 2018-04-11, 16:15:33  
谱图文件: E:\data\zw1\zw1-9-139-whelk-s, s-200-1-1-214-18.4.11.org

报告时间: 2018-04-11, 16:32:17

Brief introduction of experimental conditions

实验内容简介:  
zw1-9-139-whelk-s, s-200-1-1-214

Chromatogram Figure

色谱图 zw1-9-139-whelk-s, s-200-1-1-214-18.4.11.org

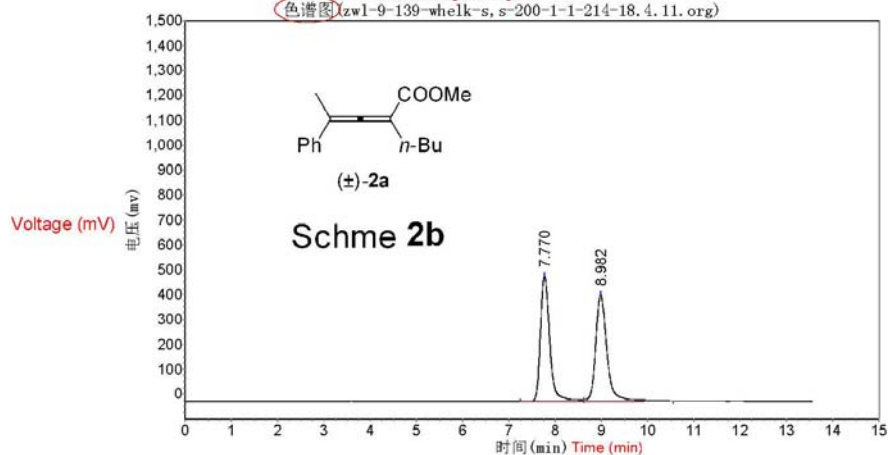

分析结果表

| 峰号 (Peak No.) | 峰名 (Peak name) | 保留时间 (Retention time) | 峰高 (Peak height) | 峰面积 (Peak area) | 含量 (Content) |
|---------------|----------------|-----------------------|------------------|-----------------|--------------|
| 1             |                | 7.770                 | 502055.188       | 7019085.000     | 49.5363      |
| 2             |                | 8.982                 | 426594.656       | 7150499.500     | 50.4637      |
| 总计            |                |                       | 928649.844       | 14169584.500    | 100.0000     |

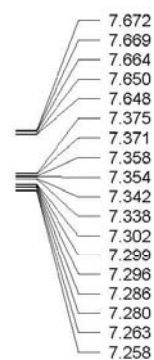

zwf-11-42-H  
Jan 29 2018  
SOLVENT: cdcl3  
NA = 8  
F1 = 399.749542 MHz  
F2 = 100.526031 MHz

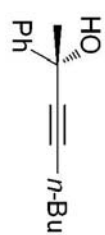

Schme 2c

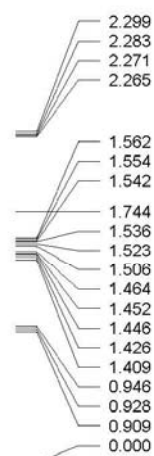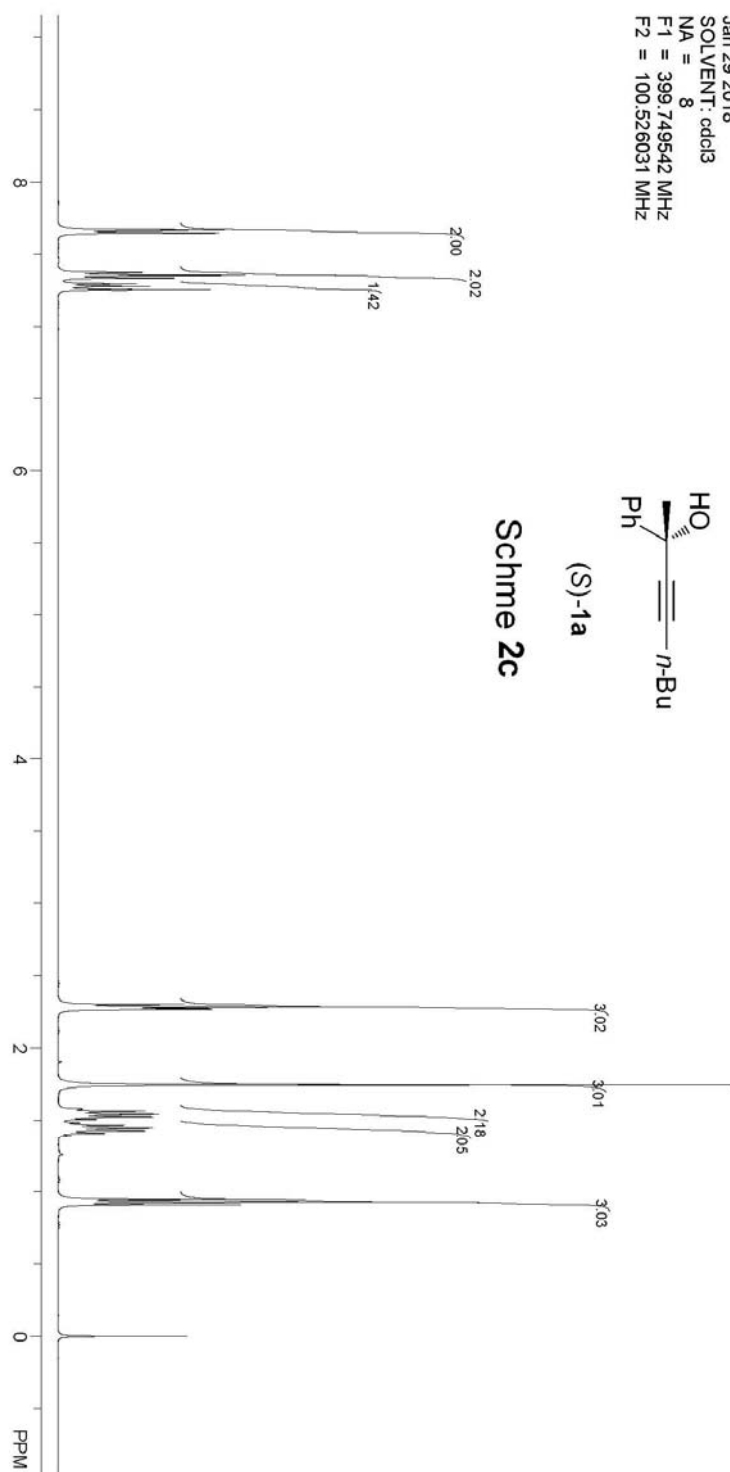

# zw1-11-42

实验时间: 2018-01-29, 10:37:25 报告时间: 2018-01-29, 13:27:28  
谱图文件: E:\data\zw1\zw1-11-42-od-h-200-1-1-214-18.1.29.org

Brief introduction of experimental conditions  
实验内容简介:  
zw1-11-42-od-h-200-1-1-214

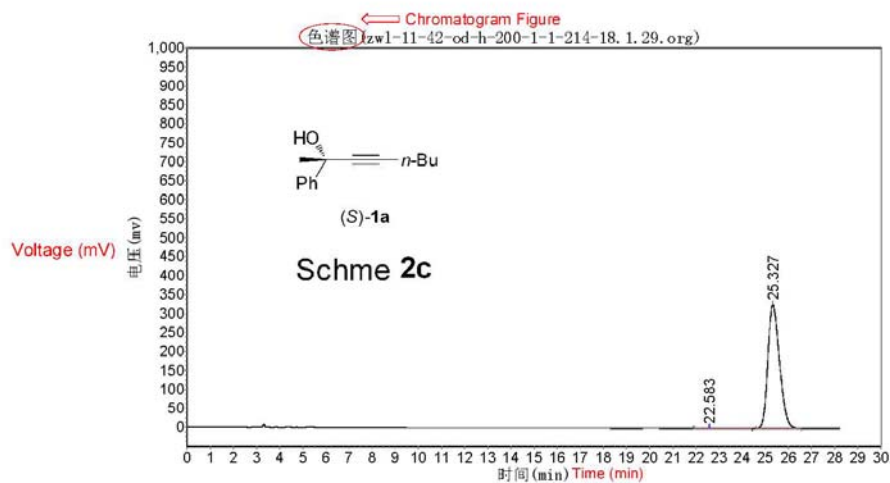

分析结果表

| 峰号(Peak No.) | 峰名(Peak name) | 保留时间(Retention time) | 峰高(Peak height) | 峰面积(Peak area) | 含量(Content) |
|--------------|---------------|----------------------|-----------------|----------------|-------------|
| 1            |               | 22.583               | 1442.024        | 47599.824      | 0.4186      |
| 2            |               | 25.327               | 326420.031      | 11324125.000   | 99.5814     |
| 总计           |               |                      | 327862.055      | 11371724.824   | 100.0000    |

zw1-10-177

实验时间: 2018-01-29, 9:09:05 报告时间: 2018-01-29, 9:42:01  
谱图文件: E:\data\zw1\zw1-10-177-od-h-200-1-1-214-18.1.29.org

实验内容简介: Brief introduction of experimental conditions  
zw1-10-177-od-h-200-1-1-214

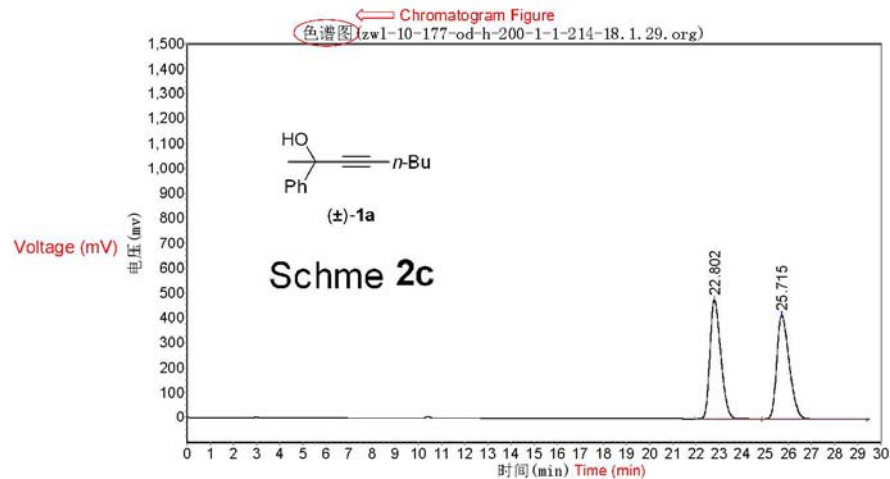

分析结果表

| 峰号 (Peak No.) | 峰名 (Peak name) | 保留时间 (Retention time) | 峰高 (Peak height) | 峰面积 (Peak area) | 含量 (Content) |
|---------------|----------------|-----------------------|------------------|-----------------|--------------|
| 1             |                | 22.802                | 477322.750       | 15513478.000    | 49.9342      |
| 2             |                | 25.715                | 416485.000       | 15554379.000    | 50.0658      |
| 总计            |                |                       | 893807.750       | 31067857.000    | 100.0000     |

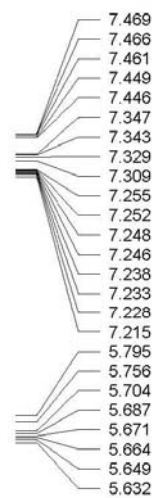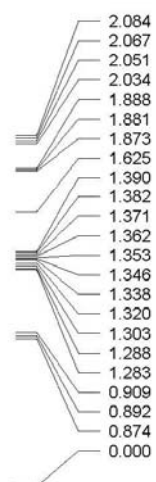

zw/-10-37-H  
Jul 1 2017  
SOLVENT: cdcl3  
NA = 8  
F1 = 399.749542 MHz  
F2 = 100.526031 MHz

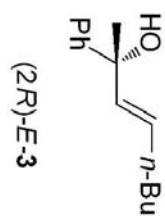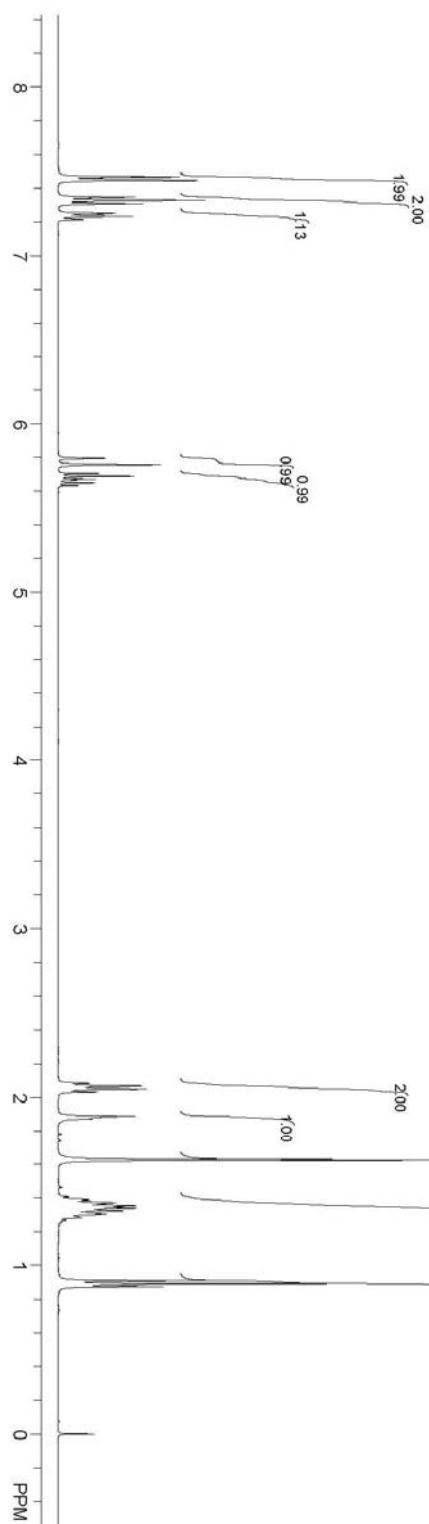

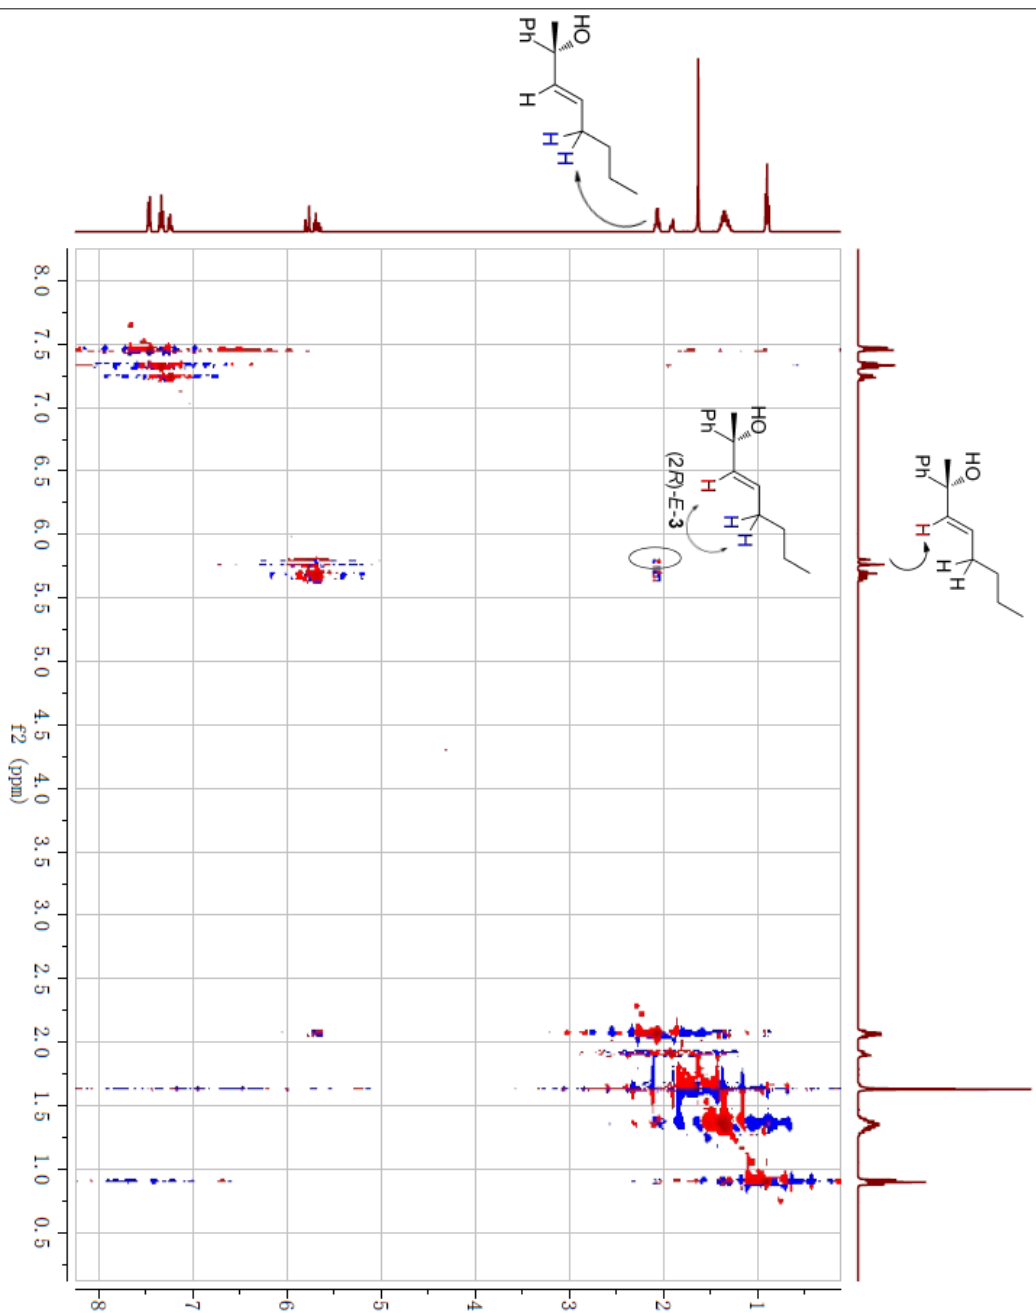

f1 (ppm)

| Parameter                 | Value (f2, f1)      |
|---------------------------|---------------------|
| 1 Title                   | zwl-10-37-NOE       |
| 2 Origin                  | Varian              |
| 3 Solvent                 | cdcl3               |
| 4 Temperature             | 26.0                |
| 5 Pulse Sequence          | NOESY               |
| 6 Experiment              | 2D-NOESY            |
| 7 Number of Scans         | 16                  |
| 8 Receiver Gain           | 38                  |
| 9 Relaxation Delay        | 1.0000              |
| 10 Pulse Width            | 0.0000              |
| 11 Acquisition Time       | 0.1499              |
| 12 Acquisition Date       | 2017-08-23T16:41:01 |
| 13 Modification Date      | 2017-08-23T20:05:06 |
| 14 Spectrometer Frequency | (399.75, 399.75)    |
| 15 Spectral Width         | (3255.2, 3255.2)    |
| 16 Lowest Frequency       | (41.2, 41.2)        |
| 17 Nucleus                | (1H, 1H)            |
| 18 Acquired Size          | (488, 200)          |
| 19 Spectral Size          | (512, 512)          |

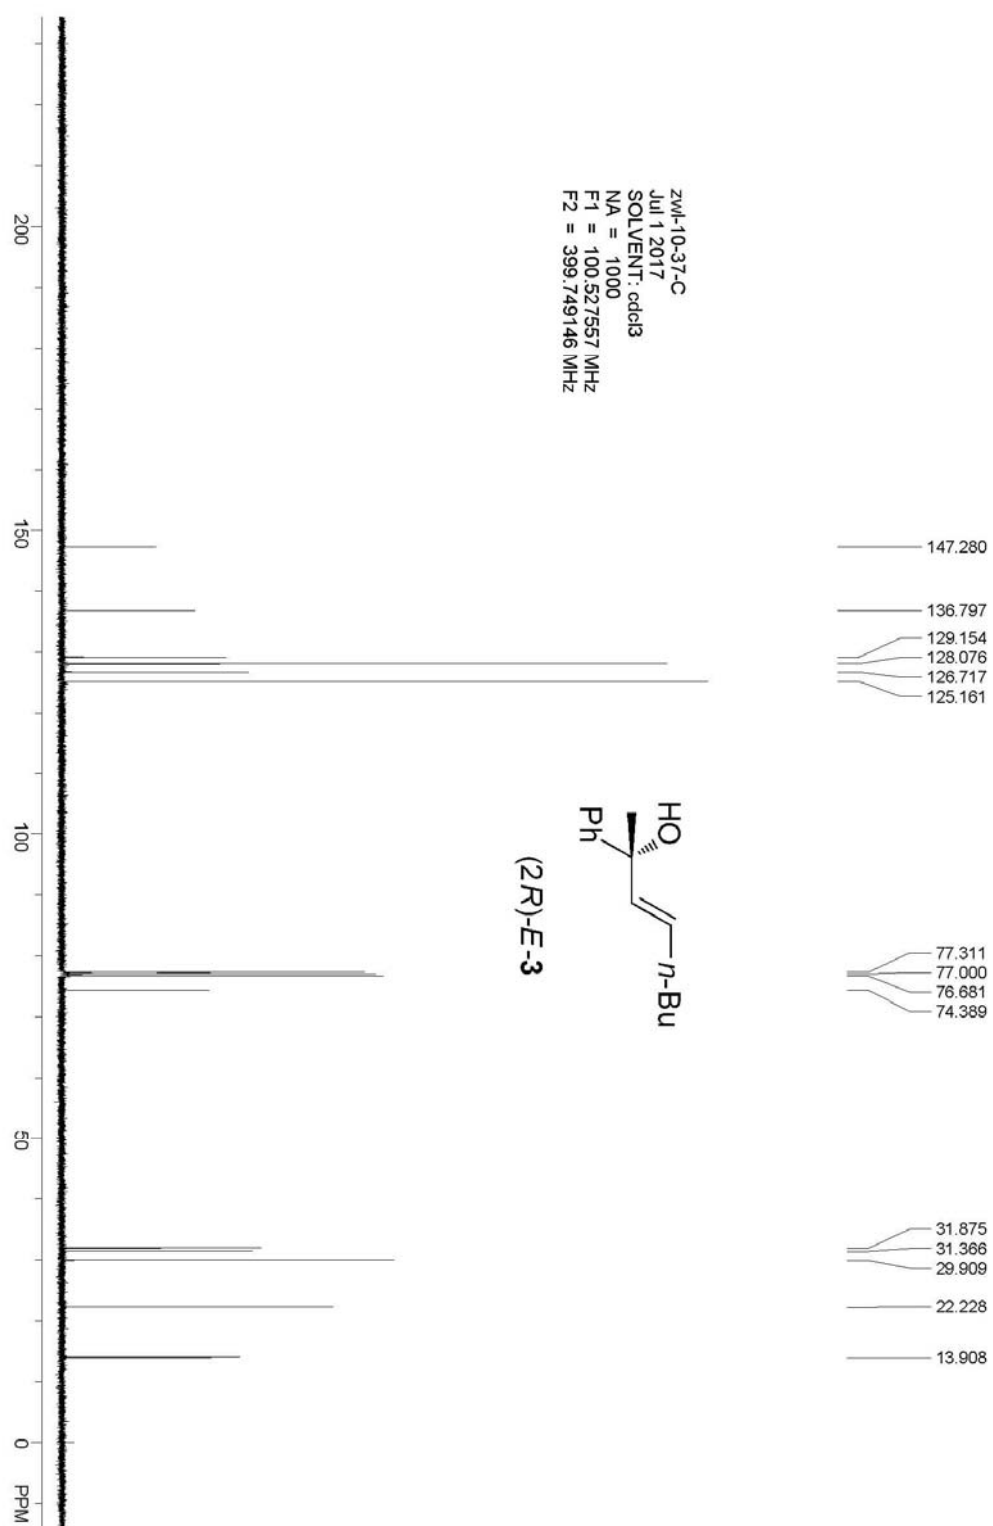

zw1-10-37-as-h-98-2-1-214

实验时间: 2017-07-06, 17:08:56 报告时间: 2017-07-06, 17:32:56  
谱图文件: D:\zhuguangjiong\zw1\20170706\zw1-10-37-as-h-98-2-1-214.org

实验内容简介:

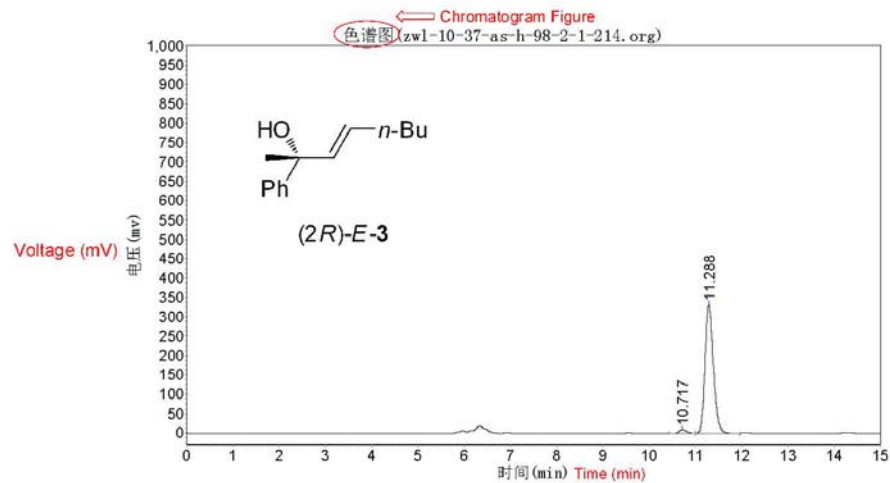

分析结果表

| 峰号 (Peak No.) | 峰名 (Peak name) | 保留时间 (Retention time) | 峰高 (Peak height) | 峰面积 (Peak area) | 含量 (Content) |
|---------------|----------------|-----------------------|------------------|-----------------|--------------|
| 1             |                | 10.717                | 9781.789         | 113525.742      | 2.6545       |
| 2             |                | 11.288                | 331645.469       | 4163275.250     | 97.3455      |
| 总计            |                |                       | 341427.258       | 4276800.992     | 100.0000     |

zwl-10-19-rac-as-h-98-2-1-214

实验时间: 2017-07-06, 16:30:02 报告时间: 2017-07-06, 17:31:30  
谱图文件: D:\zhuguangjiang\zwl\20170706\zwl-10-19-rac-as-h-98-2-1-214. org

实验内容简介:

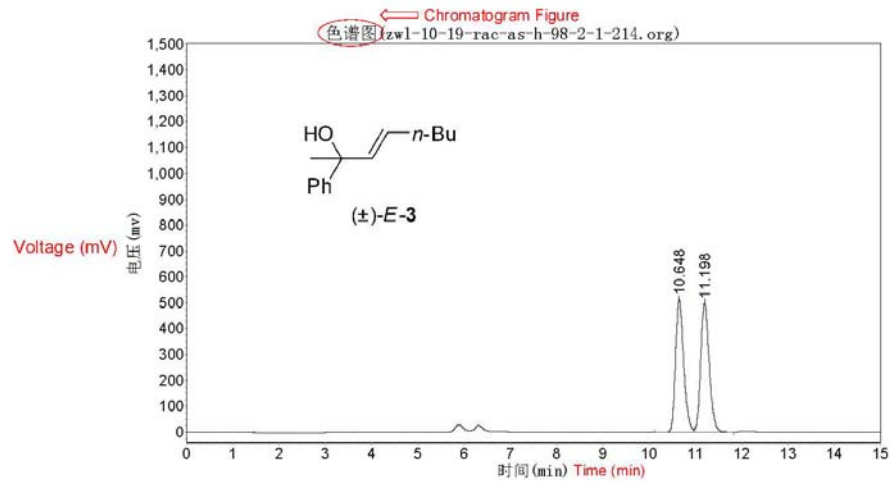

分析结果表

| 峰号 (Peak No.) | 峰名 (Peak name) | 保留时间 (Retention time) | 峰高 (Peak height) | 峰面积 (Peak area) | 含量 (Content) |
|---------------|----------------|-----------------------|------------------|-----------------|--------------|
| 1             |                | 10.648                | 513380.281       | 6305159.500     | 49.4812      |
| 2             |                | 11.198                | 499607.563       | 6437378.000     | 50.5188      |
| 总计            |                |                       | 1012987.844      | 12742537.500    | 100.0000     |

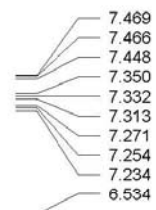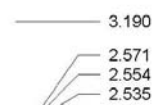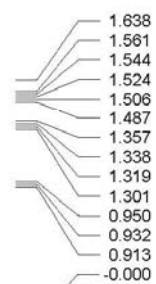

zw/-11-38-H  
Jan 16 2018  
SOLVENT: cdcl3  
NA = 4  
F1 = 399.749542 MHz  
F2 = 100.526031 MHz

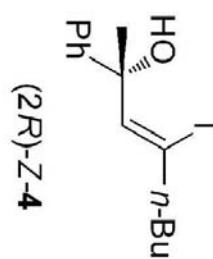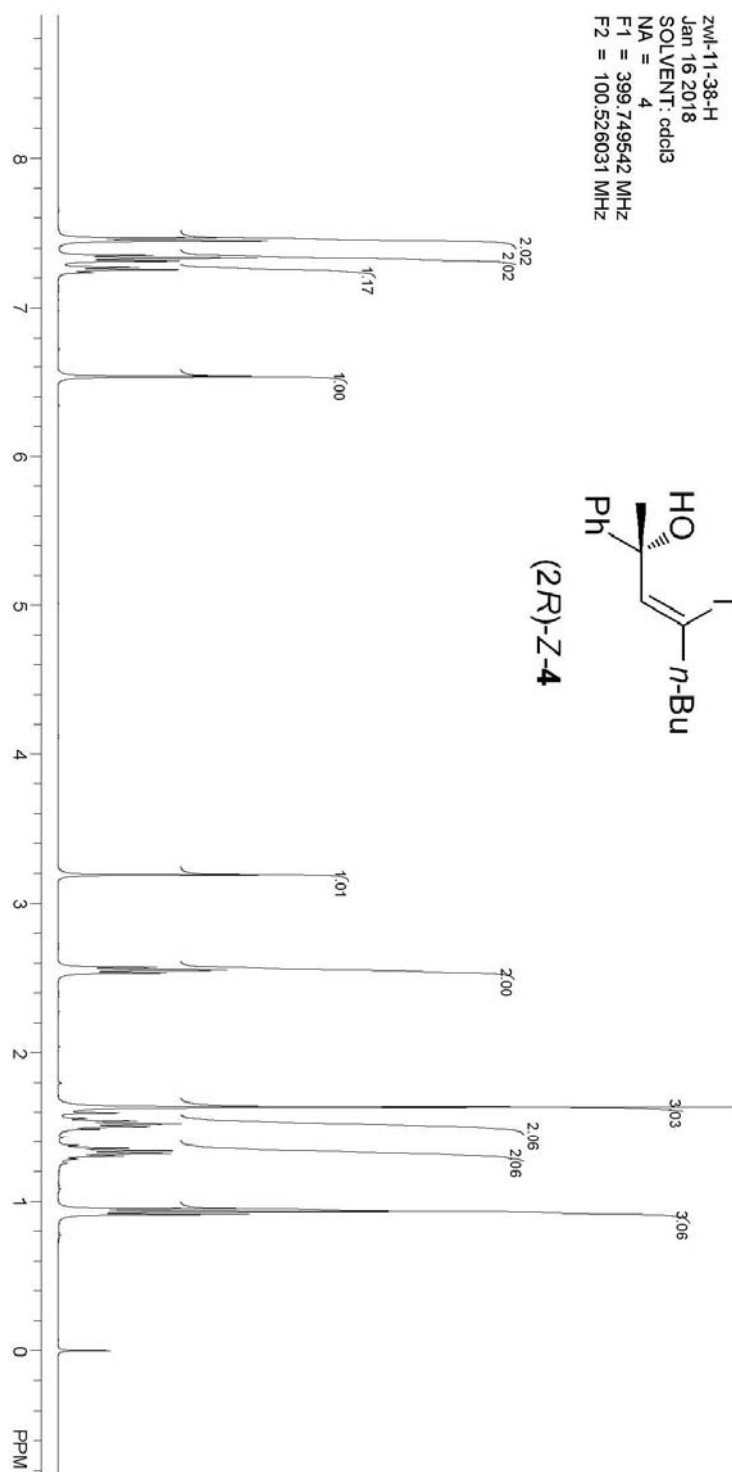

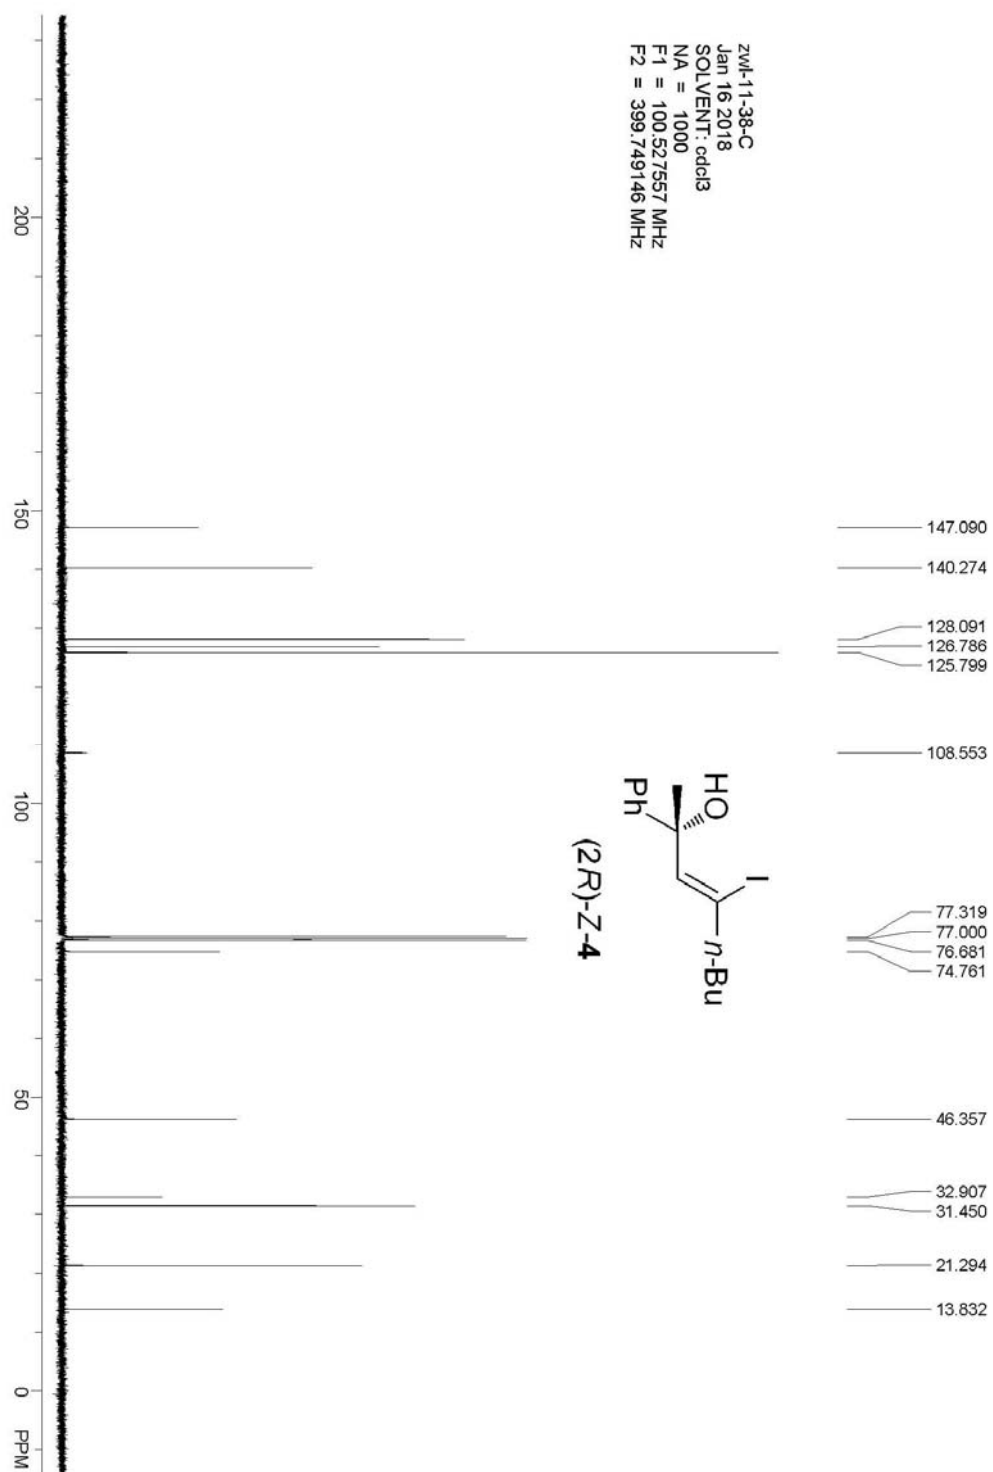

# zw1-11-38

实验时间: 2018-01-16, 20:51:53  
谱图文件: E:\data\zw1\zw1-11-38-ic-400-1-1-214-18.1.16.org  
方法文件: E:\data\zw1\zw1.mtd

报告时间: 2018-01-16, 21:52:06

实验内容简介: zw1-11-38-ic-400-1-1-214

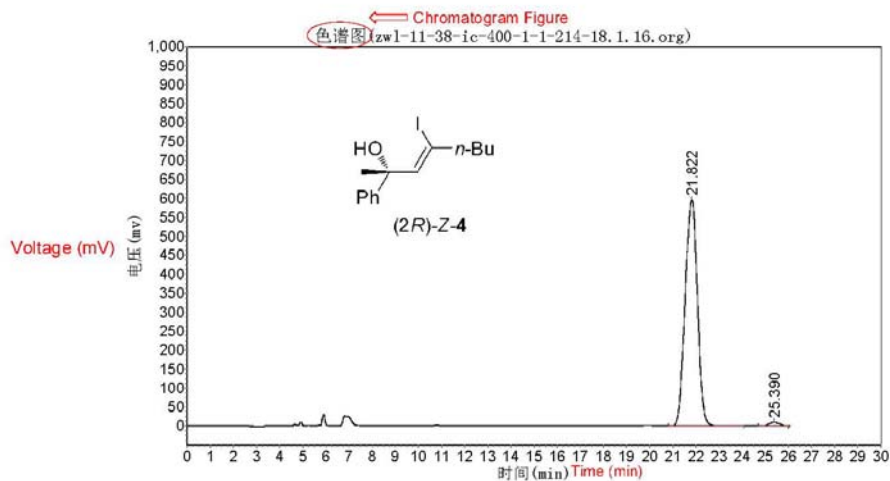

分析结果表

| 峰号(Peak No.) | 峰名(Peak name) | 保留时间(Retention time) | 峰高(Peak height) | 峰面积(Peak area) | 含量(Content) |
|--------------|---------------|----------------------|-----------------|----------------|-------------|
| 1            |               | 21.822               | 595813.625      | 21841568.368   | 97.8551     |
| 2            |               | 25.390               | 9618.172        | 478748.476     | 2.1449      |
| 总计           |               |                      | 605431.797      | 22320316.844   | 100.0000    |

## zw1-10-30

实验时间: 2018-01-16, 21:47:18

报告时间: 2018-01-16, 22:16:32

谱图文件: E:\data\zw1\zw1-10-30-ic-400-1-1-214-18.1.16.org

方法文件: E:\data\zw1\zw1.mtd

Brief introduction of experimental conditions

实验内容简介:

zw1-10-30-ic-400-1-1-214

Chromatogram Figure

色谱图 (zw1-10-30-ic-400-1-1-214-18.1.16.org)

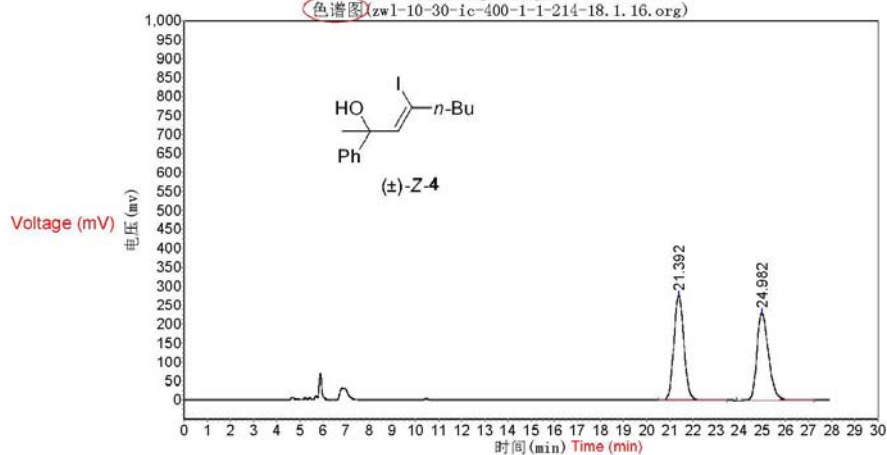

分析结果表

| 峰号 (Peak No.) | 峰名 (Peak name) | 保留时间 (Retention time) | 峰高 (Peak height) | 峰面积 (Peak area) | 含量 (Content) |
|---------------|----------------|-----------------------|------------------|-----------------|--------------|
| 1             |                | 21.392                | 275902.938       | 8311843.500     | 50.0182      |
| 2             |                | 24.982                | 230701.609       | 8305795.000     | 49.9818      |
| 总计            |                |                       | 506604.547       | 16617638.500    | 100.0000     |



zwf-10-18-purity  
 Jun 21 2017  
 SOLVENT: cdcl3  
 NA = 4  
 F1 = 399.749542 MHz  
 F2 = 100.526031 MHz

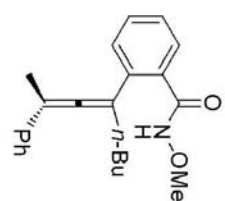

**(S)-6a**

dibromomethane (3.5  $\mu$ L, 0.05 mmol) as the  
 internal standard in 26.4 mg product

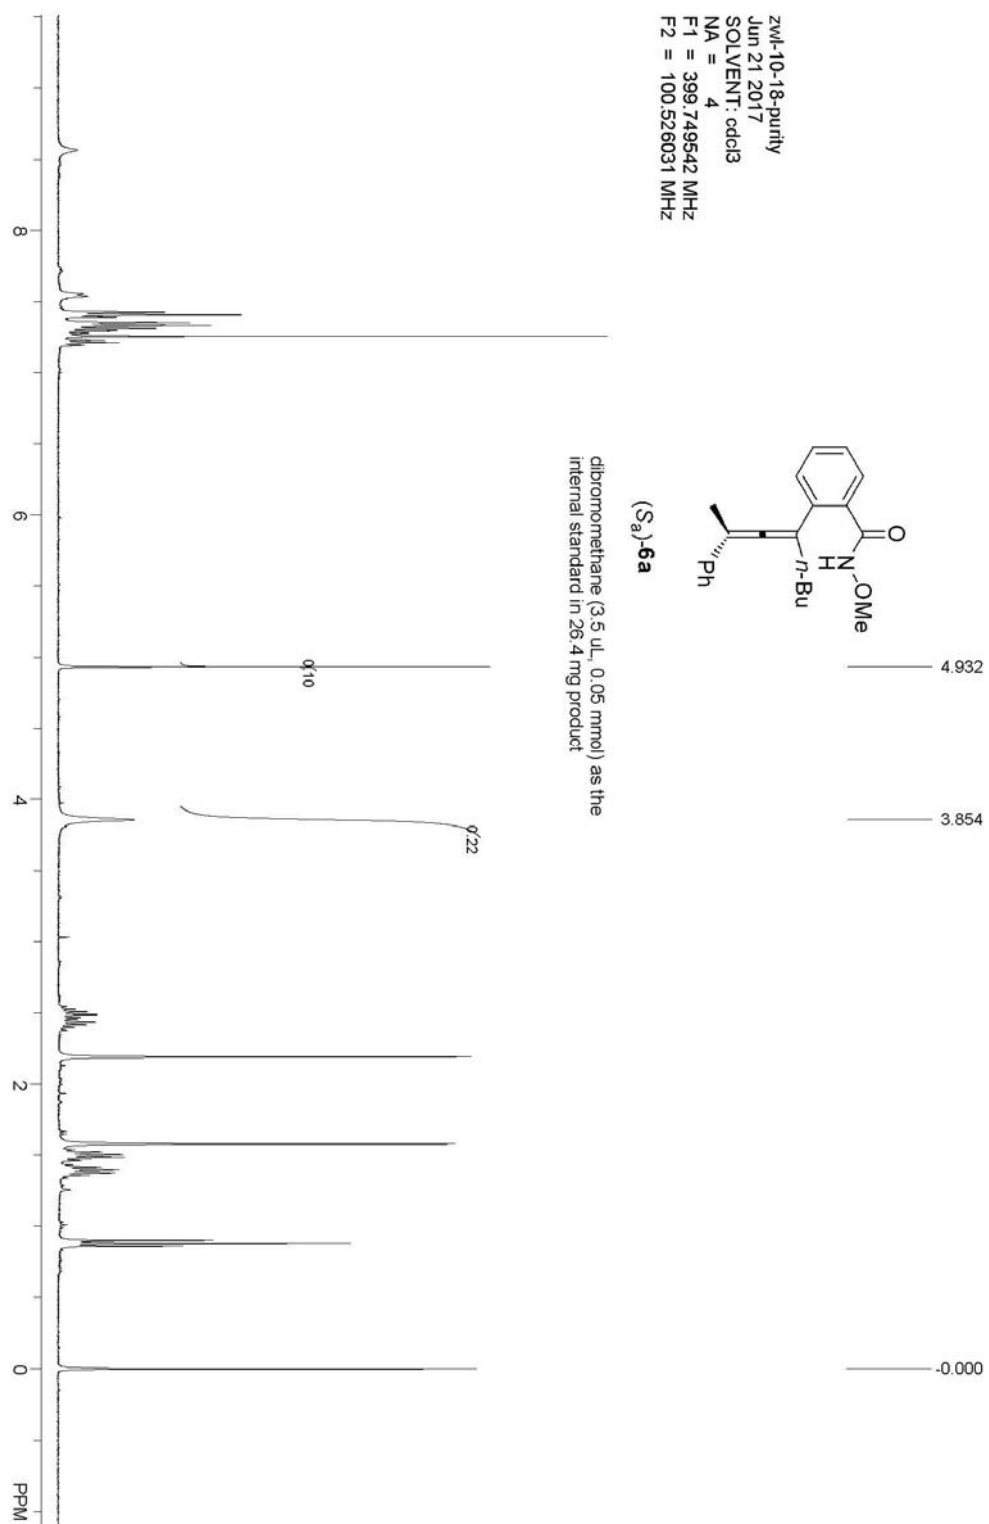

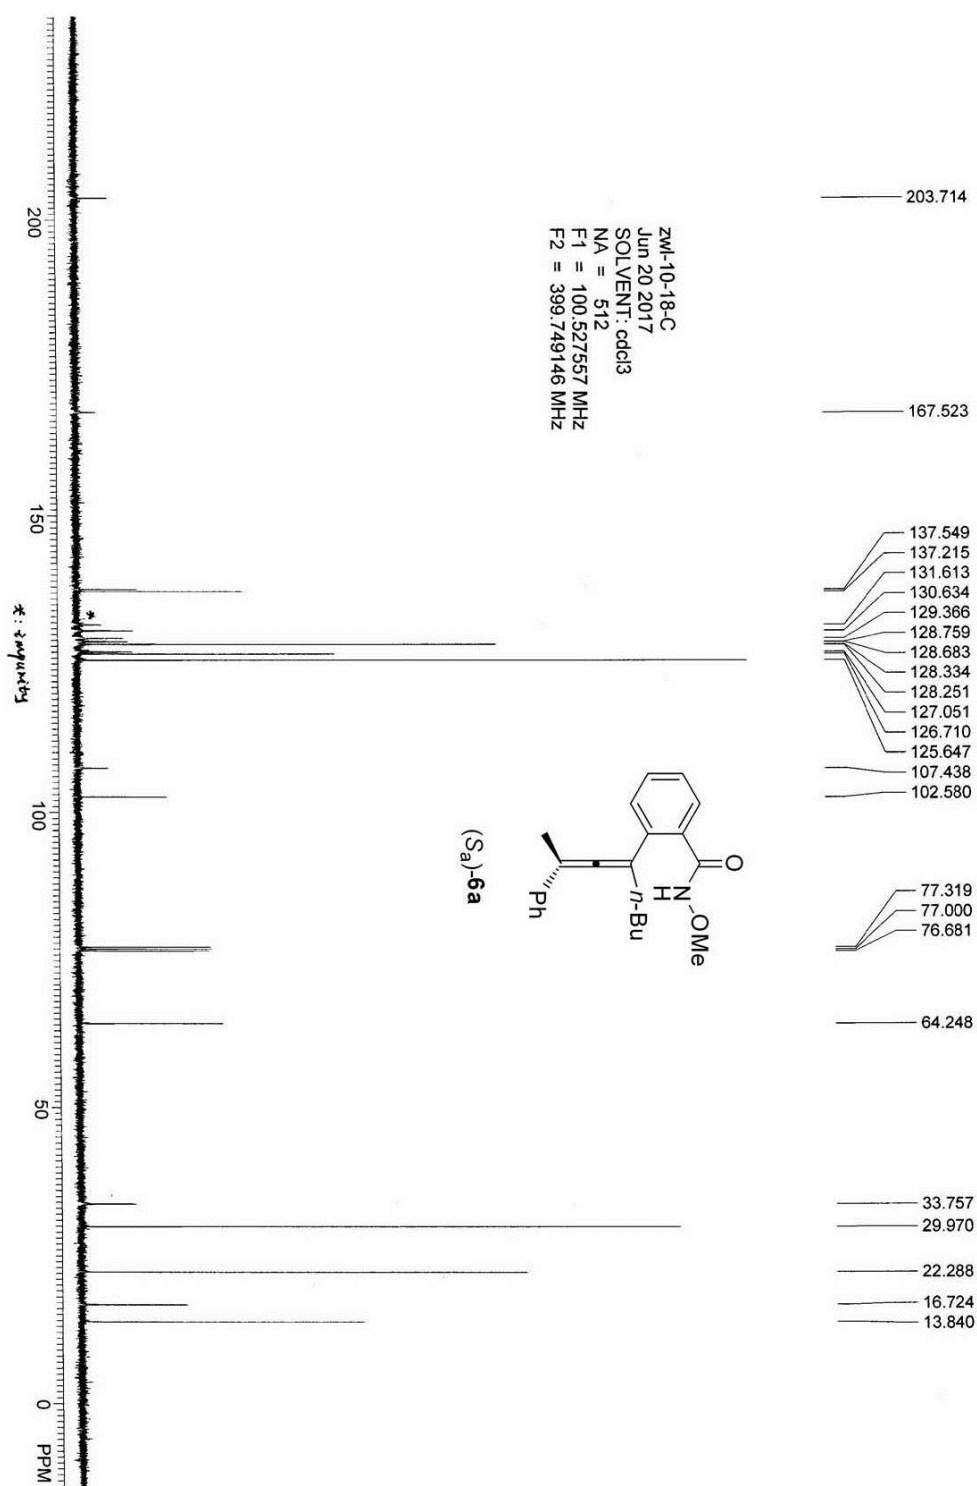

# zwl-10-18-ic-90-10-1-214

实验时间: 2017-06-23, 11:03:40 报告时间: 2017-06-23, 14:33:20  
谱图文件: D:\zhuguangjiang\zwl\20170622\zwl-10-18-ic-90-10-1-214...org

实验内容简介:

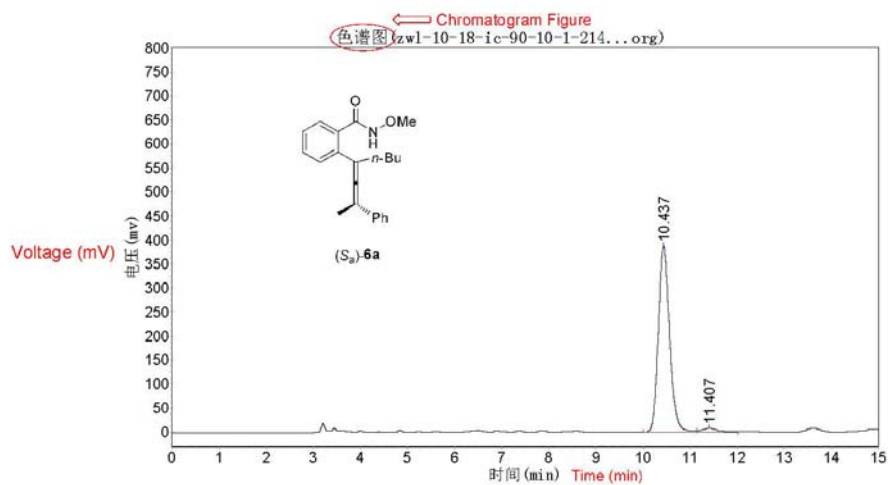

分析结果表

| 峰号(Peak No.) | 峰名(Peak name) | 保留时间(Retention time) | 峰高(Peak height) | 峰面积(Peak area) | 含量(Content) |
|--------------|---------------|----------------------|-----------------|----------------|-------------|
| 1            |               | 10.437               | 387483.156      | 6427971.500    | 97.2336     |
| 2            |               | 11.407               | 8051.422        | 182880.094     | 2.7664      |
| 总计           |               |                      | 395534.579      | 6610851.594    | 100.0000    |

# zw1-10-11-ic-90-10-1-214

实验时间: 2017-06-23, 11:20:28 报告时间: 2017-06-23, 14:32:09  
谱图文件: D:\zhuguangjiang\zw1\20170622\zw1-10-11-ic-90-10-1-214...org

实验内容简介:

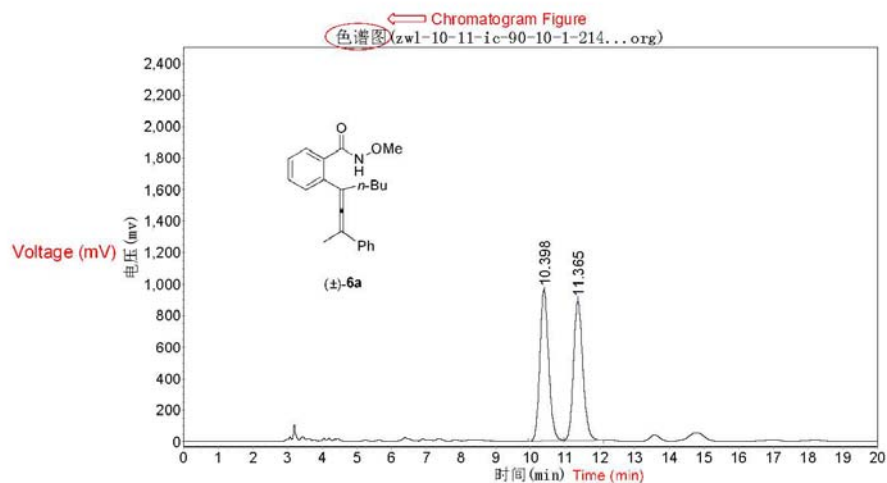

分析结果表

| 峰号 (Peak No.) | 峰名 (Peak name) | 保留时间 (Retention time) | 峰高 (Peak height) | 峰面积 (Peak area) | 含量 (Content) |
|---------------|----------------|-----------------------|------------------|-----------------|--------------|
| 1             |                | 10.398                | 961972.500       | 17275850.000    | 50.1575      |
| 2             |                | 11.365                | 887794.125       | 17167346.000    | 49.8425      |
| 总计            |                |                       | 1849766.625      | 34443196.000    | 100.0000     |

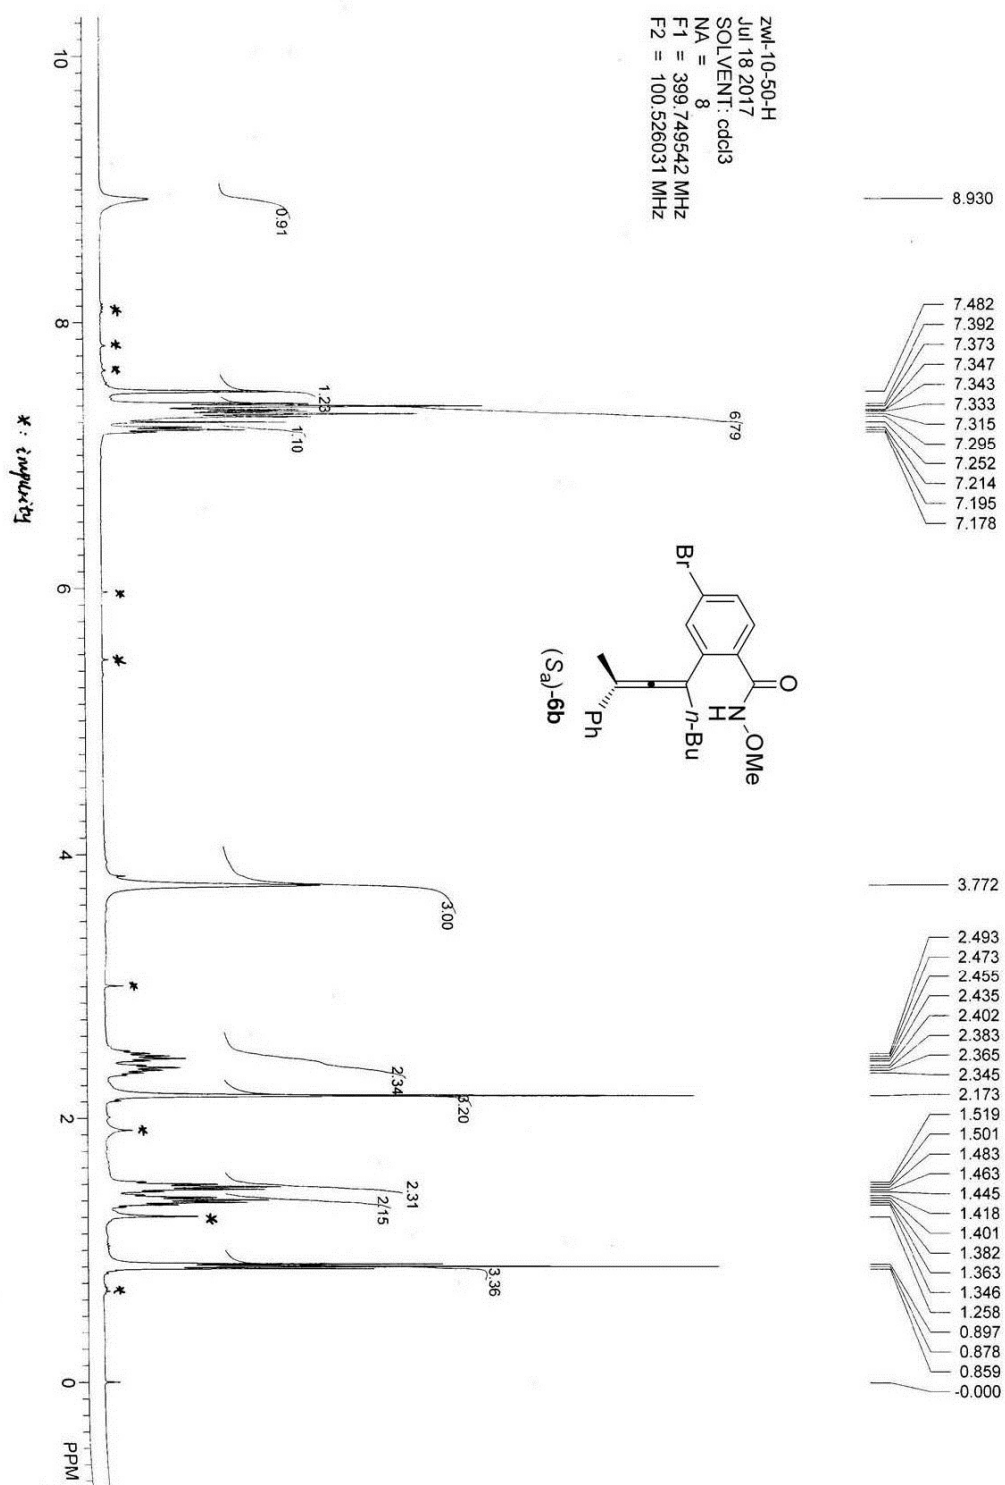

zw/-10-50-purity  
 Jul 19 2017  
 SOLVENT: cdcl3  
 NA = 4  
 F1 = 399.749542 MHz  
 F2 = 100.526031 MHz

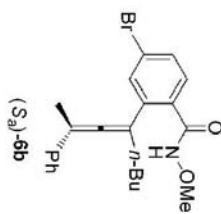

dibromomethane (1.4  $\mu$ L, 0.02 mmol) as the  
 internal standard in 39.4 mg product

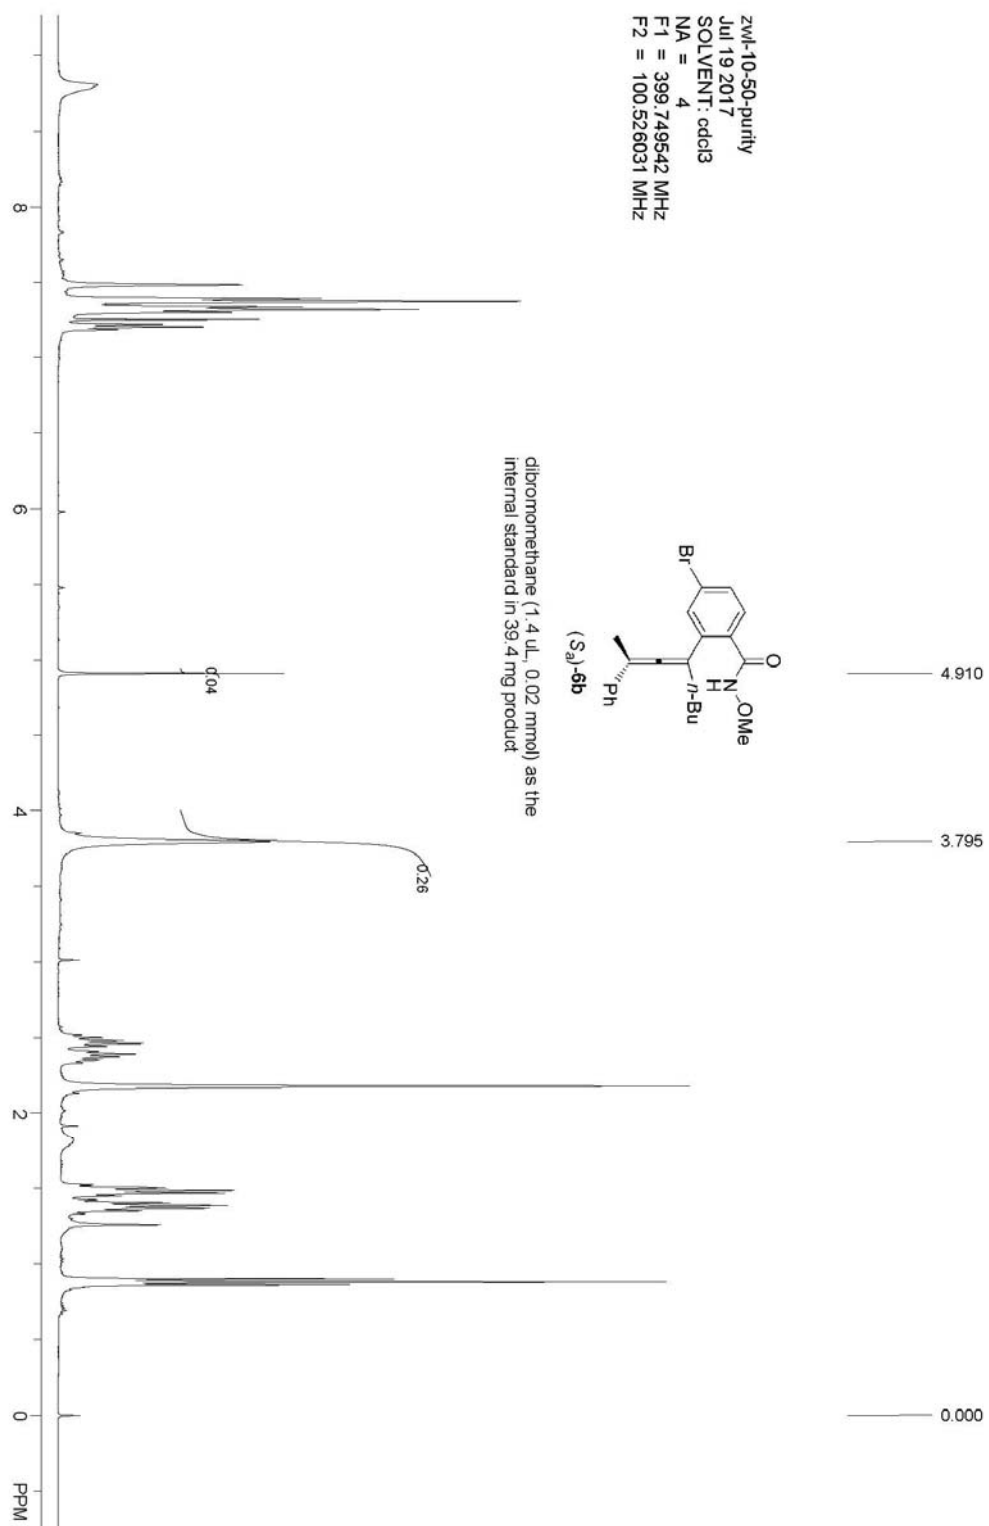

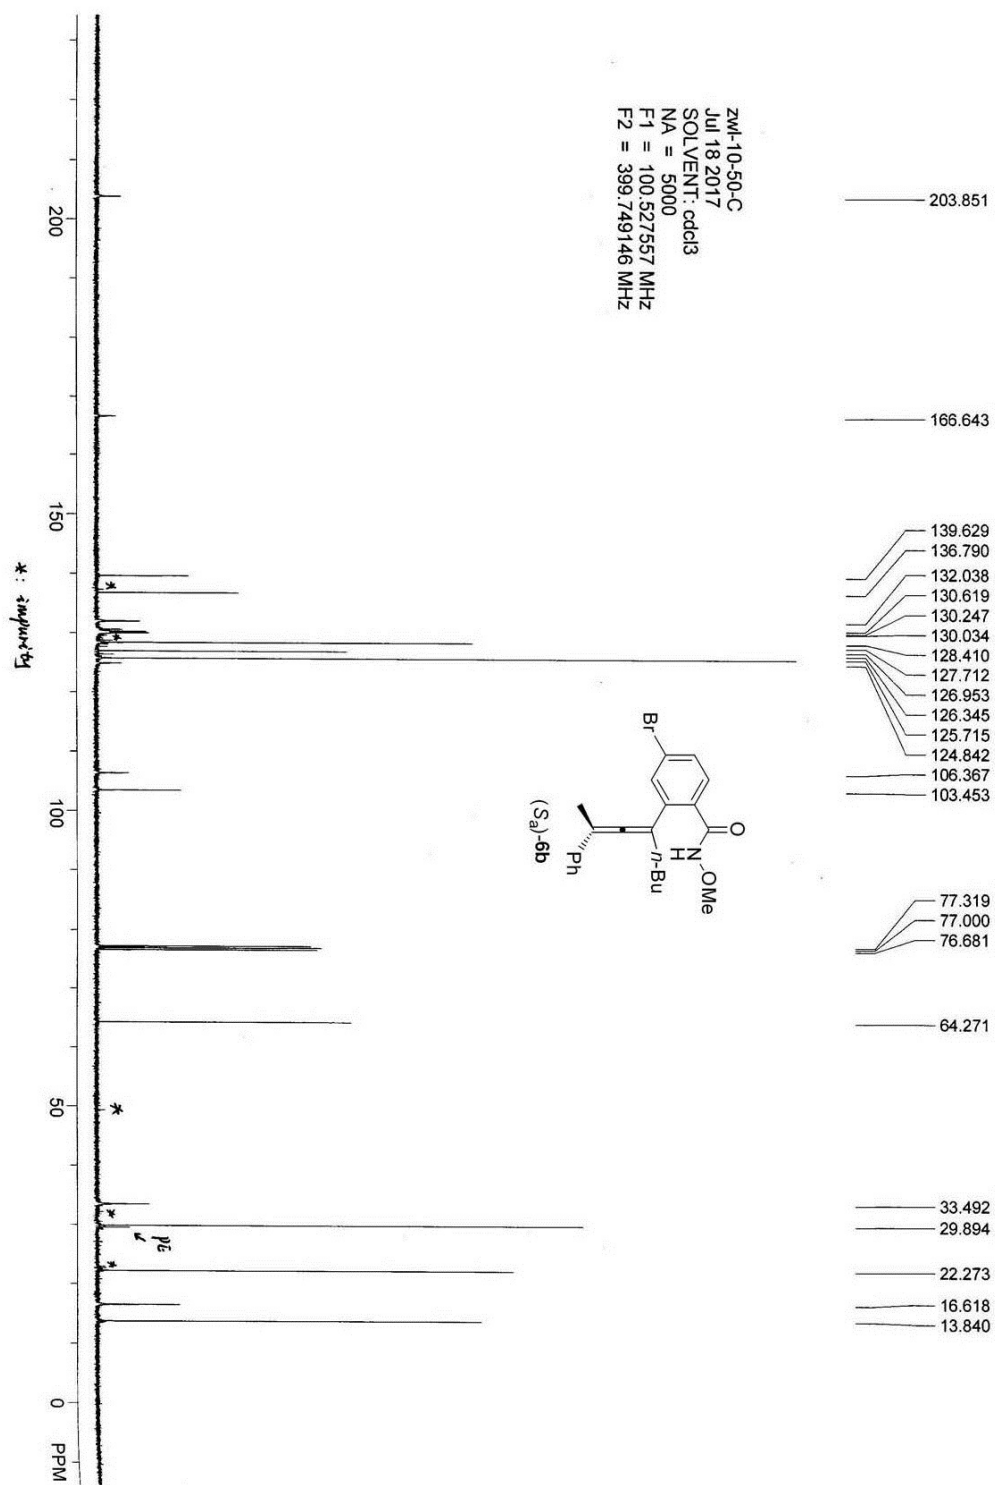

## SAMPLE INFORMATION

|                   |                       |                  |                        |
|-------------------|-----------------------|------------------|------------------------|
| Sample Name:      | zw-1050-ic-95-5-1-214 | Acquired By:     | Breeze                 |
| Sample Type:      | 未知                    | Date Acquired:   | 2017/7/13 17:10:27 CST |
| Vial:             | 999                   | Acq. Method:     | zg95                   |
| Injection#:       | 191                   | Date Processed:  | 2017/7/13 18:22:04 CST |
| Injection Volume: | 10.00 uL              | Channel Name:    | V0489 ChA              |
| Run Time:         | 20.00 Minutes         | Channel Desc.:   | V0489 ChA.214nm        |
| Column Type:      |                       | Sample Set Name: |                        |

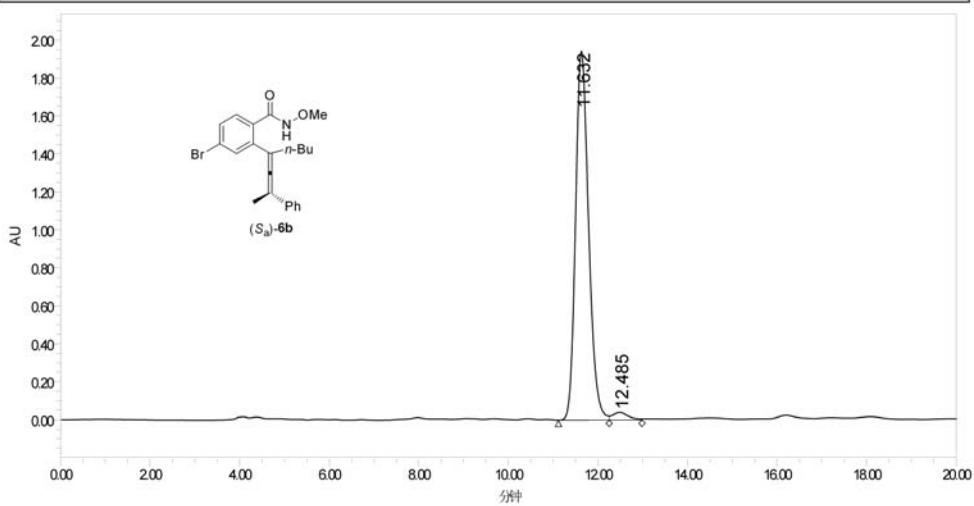

|   | RT<br>(min) | Area<br>(AU*sec) | %Area | Height<br>(AU) | %<br>Height |
|---|-------------|------------------|-------|----------------|-------------|
| 1 | 11.632      | 36813384         | 97.56 | 1942947        | 97.96       |
| 2 | 12.485      | 965271           | 2.44  | 40052          | 2.02        |

## SAMPLE INFORMATION

|                   |                      |                  |                        |
|-------------------|----------------------|------------------|------------------------|
| Sample Name:      | zw-1049ic-95-5-1-214 | Acquired By:     | Breeze                 |
| Sample Type:      | 未知                   | Date Acquired:   | 2017/7/13 16:00:50 CST |
| Vial:             | 999                  | Acq. Method:     | zg95                   |
| Injection#:       | 189                  | Date Processed:  | 2017/7/13 16:43:49 CST |
| Injection Volume: | 10.00 u              | Channel Name:    | V0489 ChA              |
| Run Time:         | 65.00 Minutes        | Channel Desc.:   | V0489 ChA.214nm        |
| Column Type:      |                      | Sample Set Name: |                        |

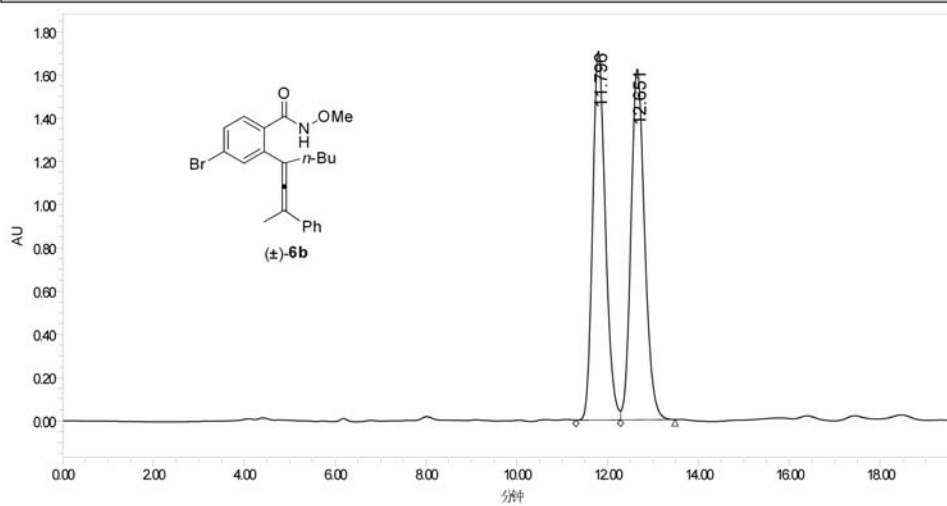

|   | RT<br>(min) | Area<br>(AU*sec) | %Area | Height<br>(AU) | %<br>Height |
|---|-------------|------------------|-------|----------------|-------------|
| 1 | 11.796      | 3329062          | 49.52 | 1707801        | 51.27       |
| 2 | 12.651      | 3391962          | 50.47 | 1623272        | 48.72       |
